# Supplementary material
Source: MDPI journal article supplement (https://www.mdpi.com/2075-163X/8/12/586)
Supplement: s1 [file s1]

data_anders_1
_audit_creation_date               2018-11-01
_audit_creation_method
;
Olex2 1.2
(compiled 2018.05.29 svn.r3508 for OlexSys, GUI svn.r5506)
;
_shelx_SHELXL_version_number       '2018/3'
_audit_contact_author_address      ?
_audit_contact_author_email        ?
_audit_contact_author_name         ''
_audit_contact_author_phone        ?
_publ_contact_author_id_orcid      ?
_publ_section_references
;
Dolomanov, O.V., Bourhis, L.J., Gildea, R.J, Howard, J.A.K. & Puschmann, H.
 (2009), J. Appl. Cryst. 42, 339-341.

Sheldrick, G.M. (2008). Acta Cryst. A64, 112-122.

Sheldrick, G.M. (2015). Acta Cryst. C71, 3-8.
;
_chemical_name_common              ?
_chemical_name_systematic          ?
_chemical_formula_moiety          
 'Na2 Ca [(U O2)(C O3)3], 5.28(H2O)'
_chemical_formula_sum              'C3 H10.56 Ca Na2 O16.28 U'
_chemical_formula_weight           631.25
_chemical_melting_point            ?

loop_
  _atom_type_symbol
  _atom_type_description
  _atom_type_scat_dispersion_real
  _atom_type_scat_dispersion_imag
  _atom_type_scat_source
 'C' 'C' 0.0033 0.0016 'International Tables Vol C Tables 4.2.6.8 and 6.1.1.4'
 'H' 'H' 0.0000 0.0000 'International Tables Vol C Tables 4.2.6.8 and 6.1.1.4'
 'Ca' 'Ca' 0.2262 0.3064 'International Tables Vol C Tables 4.2.6.8 and 6.1.1.4'
 'Na' 'Na' 0.0362 0.0249 'International Tables Vol C Tables 4.2.6.8 and 6.1.1.4'
 'O' 'O' 0.0106 0.0060 'International Tables Vol C Tables 4.2.6.8 and 6.1.1.4'
 'U' 'U' -9.6767 9.6646 'International Tables Vol C Tables 4.2.6.8 and 6.1.1.4'

_shelx_space_group_comment
;
The symmetry employed for this shelxl refinement is uniquely defined
by the following loop, which should always be used as a source of
symmetry information in preference to the above space-group names.
They are only intended as comments.
;
_space_group_crystal_system        'trigonal'
_space_group_IT_number             166
_space_group_name_H-M_alt          'R -3 m'
_space_group_name_Hall             '-R 3 2"'
loop_
  _space_group_symop_operation_xyz
 'x, y, z'
 '-y, x-y, z'
 '-x+y, -x, z'
 'x-y, -y, -z'
 '-x, -x+y, -z'
 'y, x, -z'
 'x+2/3, y+1/3, z+1/3'
 '-y+2/3, x-y+1/3, z+1/3'
 '-x+y+2/3, -x+1/3, z+1/3'
 'x-y+2/3, -y+1/3, -z+1/3'
 '-x+2/3, -x+y+1/3, -z+1/3'
 'y+2/3, x+1/3, -z+1/3'
 'x+1/3, y+2/3, z+2/3'
 '-y+1/3, x-y+2/3, z+2/3'
 '-x+y+1/3, -x+2/3, z+2/3'
 'x-y+1/3, -y+2/3, -z+2/3'
 '-x+1/3, -x+y+2/3, -z+2/3'
 'y+1/3, x+2/3, -z+2/3'
 '-x, -y, -z'
 'y, -x+y, -z'
 'x-y, x, -z'
 '-x+y, y, z'
 'x, x-y, z'
 '-y, -x, z'
 '-x+2/3, -y+1/3, -z+1/3'
 'y+2/3, -x+y+1/3, -z+1/3'
 'x-y+2/3, x+1/3, -z+1/3'
 '-x+y+2/3, y+1/3, z+1/3'
 'x+2/3, x-y+1/3, z+1/3'
 '-y+2/3, -x+1/3, z+1/3'
 '-x+1/3, -y+2/3, -z+2/3'
 'y+1/3, -x+y+2/3, -z+2/3'
 'x-y+1/3, x+2/3, -z+2/3'
 '-x+y+1/3, y+2/3, z+2/3'
 'x+1/3, x-y+2/3, z+2/3'
 '-y+1/3, -x+2/3, z+2/3'

_cell_length_a                     17.8448(4)
_cell_length_b                     17.8448(4)
_cell_length_c                     23.6688(6)
_cell_angle_alpha                  90
_cell_angle_beta                   90
_cell_angle_gamma                  120
_cell_volume                       6527.3(3)
_cell_formula_units_Z              18
_cell_measurement_reflns_used      5401
_cell_measurement_temperature      100(2)
_cell_measurement_theta_max        30.8040
_cell_measurement_theta_min        2.2730
_shelx_estimated_absorpt_T_max     ?
_shelx_estimated_absorpt_T_min     ?
_exptl_absorpt_coefficient_mu      11.691
_exptl_absorpt_correction_T_max    0.06098
_exptl_absorpt_correction_T_min    0.03321
_exptl_absorpt_correction_type            analytical
_exptl_absorpt_process_details
;
CrysAlisPro 1.171.39.44a (Rigaku Oxford Diffraction, 2018)
Analytical numeric absorption correction using a multifaceted crystal
			model based on expressions derived by R.C. Clark & J.S. Reid.
(Clark, R. C. & Reid, J. S. (1995). Acta Cryst. A51, 887-897)
Empirical absorption correction using spherical harmonics,
 implemented in SCALE3 ABSPACK scaling algorithm.
;
_exptl_absorpt_special_details     ?
_exptl_crystal_colour              'yellow'
_exptl_crystal_density_diffrn      2.891
_exptl_crystal_density_meas        ?
_exptl_crystal_density_method      ?
_exptl_crystal_description         'prism'
_exptl_crystal_F_000               5271
loop_
  _exptl_crystal_face_index_h
  _exptl_crystal_face_index_k
  _exptl_crystal_face_index_l
  _exptl_crystal_face_perp_dist
 -17 23 10 0.0924
 -15 9 -27 0.1676
 -6 -3 -31 0.1654
 -7 -1 31 0.1999
 15 10 2 0.0998
 3 -1 -33 0.1651
 20 -22 6 0.1123
 -15 -9 11 0.0935
 17 -13 23 0.1137

_exptl_crystal_size_max            0.384
_exptl_crystal_size_mid            0.27
_exptl_crystal_size_min            0.248
loop_
  _exptl_oxdiff_crystal_face_indexfrac_h
  _exptl_oxdiff_crystal_face_indexfrac_k
  _exptl_oxdiff_crystal_face_indexfrac_l
  _exptl_oxdiff_crystal_face_x
  _exptl_oxdiff_crystal_face_y
  _exptl_oxdiff_crystal_face_z
 -16.5576 23.2871 10.1683 0.2113 0.8837 0.4176
 -14.7860 9.2458 -26.8638 0.1381 0.5732 -0.8077
 -6.1127 -2.6232 -31.1650 0.0289 0.1164 -0.9928
 -6.8266 -1.2321 31.3115 -0.6313 0.1519 0.7605
 15.0939 9.8269 2.1889 0.8830 -0.2111 0.4192
 2.8440 -1.4854 -33.1421 0.4073 -0.0984 -0.9080
 20.2357 -22.4071 6.3914 -0.2315 -0.9668 0.1079
 -15.0492 -8.5310 10.5257 -0.9715 0.2327 -0.0441
 17.1024 -13.0898 23.4952 -0.1689 -0.7078 0.6860

_exptl_transmission_factor_max     ?
_exptl_transmission_factor_min     ?
_diffrn_reflns_av_R_equivalents    0.0342
_diffrn_reflns_av_unetI/netI       0.0218
_diffrn_reflns_Laue_measured_fraction_full  0.999
_diffrn_reflns_Laue_measured_fraction_max  0.999
_diffrn_reflns_limit_h_max         18
_diffrn_reflns_limit_h_min         -22
_diffrn_reflns_limit_k_max         22
_diffrn_reflns_limit_k_min         -23
_diffrn_reflns_limit_l_max         30
_diffrn_reflns_limit_l_min         -30
_diffrn_reflns_number              11925
_diffrn_reflns_point_group_measured_fraction_full  0.999
_diffrn_reflns_point_group_measured_fraction_max  0.999
_diffrn_reflns_theta_full          25.242
_diffrn_reflns_theta_max           27.493
_diffrn_reflns_theta_min           2.168
_diffrn_ambient_temperature        100(2)
_diffrn_detector                   'CCD plate'
_diffrn_detector_area_resol_mean   16.2096
_diffrn_detector_type              Eos
_diffrn_measured_fraction_theta_full  0.999
_diffrn_measured_fraction_theta_max  0.999
_diffrn_measurement_details
;
List of Runs (angles in degrees, time in seconds):

  # Type    Start    End  Width  t~exp~   \w     \q     \k     \f   Frames
--------------------------------------------------------------------------
  1  \w    -98.00 -32.00   1.00    5.00    --  -22.42 178.00 120.00   66
  2  \w     12.00  75.00   1.00    5.00    --   23.36  38.00  90.00   63
  3  \w     20.00  87.00   1.00    5.00    --   23.36  19.00  30.00   67
  4  \w      3.00  77.00   1.00    5.00    --   23.36  57.00-120.00   74
;
_diffrn_measurement_device         'four-circle diffractometer'
_diffrn_measurement_device_type    'Xcalibur, Eos'
_diffrn_measurement_method         '\w scans'
_diffrn_orient_matrix_type        
 'CrysAlisPro convention (1999,Acta A55,543-557)'
_diffrn_orient_matrix_UB_11        0.0349027000
_diffrn_orient_matrix_UB_12        0.0387044000
_diffrn_orient_matrix_UB_13        -0.0110294000
_diffrn_orient_matrix_UB_21        -0.0264640000
_diffrn_orient_matrix_UB_22        0.0192036000
_diffrn_orient_matrix_UB_23        -0.0001614000
_diffrn_orient_matrix_UB_31        0.0136568000
_diffrn_orient_matrix_UB_32        0.0154711000
_diffrn_orient_matrix_UB_33        0.0278748000
_diffrn_radiation_monochromator    graphite
_diffrn_radiation_probe            x-ray
_diffrn_radiation_type             MoK\a
_diffrn_radiation_wavelength       0.71073
_diffrn_source                     'fine-focus sealed X-ray tube'
_diffrn_source_type                'Enhance (Mo) X-ray Source'
_reflns_Friedel_coverage           0.000
_reflns_Friedel_fraction_full      .
_reflns_Friedel_fraction_max       .
_reflns_number_gt                  1697
_reflns_number_total               1836
_reflns_odcompleteness_completeness  99.95
_reflns_odcompleteness_iscentric   1
_reflns_odcompleteness_theta       28.51
_reflns_special_details
;
 Reflections were merged by SHELXL according to the crystal
 class for the calculation of statistics and refinement.
 
 _reflns_Friedel_fraction is defined as the number of unique
 Friedel pairs measured divided by the number that would be
 possible theoretically, ignoring centric projections and
 systematic absences.
;
_reflns_threshold_expression       'I > 2\s(I)'
_computing_cell_refinement         'CrysAlisPro 1.171.39.44a (Rigaku OD, 2018)'
_computing_data_collection         'CrysAlisPro 1.171.39.44a (Rigaku OD, 2018)'
_computing_data_reduction          'CrysAlisPro 1.171.39.44a (Rigaku OD, 2018)'
_computing_molecular_graphics      'Olex2 (Dolomanov et al., 2009)'
_computing_publication_material    'Olex2 (Dolomanov et al., 2009)'
_computing_structure_refinement    'ShelXL (Sheldrick, 2015)'
_computing_structure_solution      'ShelXS (Sheldrick, 2008)'
_refine_diff_density_max           0.945
_refine_diff_density_min           -0.958
_refine_diff_density_rms           0.128
_refine_ls_extinction_coef         0.000047(5)
_refine_ls_extinction_expression  
 'Fc^*^=kFc[1+0.001xFc^2^\l^3^/sin(2\q)]^-1/4^'
_refine_ls_extinction_method       'SHELXL-2018/3 (Sheldrick 2018)'
_refine_ls_goodness_of_fit_ref     1.121
_refine_ls_hydrogen_treatment      mixed
_refine_ls_matrix_type             full
_refine_ls_number_parameters       161
_refine_ls_number_reflns           1836
_refine_ls_number_restraints       16
_refine_ls_R_factor_all            0.0215
_refine_ls_R_factor_gt             0.0182
_refine_ls_restrained_S_all        1.121
_refine_ls_shift/su_max            0.000
_refine_ls_shift/su_mean           0.000
_refine_ls_structure_factor_coef   Fsqd
_refine_ls_weighting_details      
 'w=1/[\s^2^(Fo^2^)+(0.0103P)^2^+58.4261P] where P=(Fo^2^+2Fc^2^)/3'
_refine_ls_weighting_scheme        calc
_refine_ls_wR_factor_gt            0.0382
_refine_ls_wR_factor_ref           0.0390
_refine_special_details            ?
_olex2_refinement_description
;
1. Fixed Uiso
 At 1.5 times of:
  All H(H) groups, All O(H) groups, All O(H,H) groups
2. Restrained distances
 OW3-HW3
 0.9 with sigma of 0.02
 OW4-HW4
 0.9 with sigma of 0.02
 OW4-HW4A
 0.9 with sigma of 0.02
 OW4A-HW4A
 0.9 with sigma of 0.02
 Na2-HW4B
 3 with sigma of 0.02
 OW4A-HW4B = OW4-HW4B
 0.9 with sigma of 0.02
 HW4B-OW4A_$2
 1.95 with sigma of 0.02
 Na1-HW2B
 2.8 with sigma of 0.02
 OW2-HW2A
 0.9 with sigma of 0.02
 OW2-HW2B
 0.9 with sigma of 0.02
 HW2B-OW2_$1
 1.8 with sigma of 0.02
 OW1-HW1
 0.9 with sigma of 0.02
 HW5-OW5
 0.9 with sigma of 0.02
 HW5-HW5_$3
 1.5 with sigma of 0.02
 HW5C-OW5A
 0.9 with sigma of 0.02
3. Uiso/Uaniso restraints and constraints
Uanis(OW4A) = Uanis(OW4)
Uanis(OW5A) = Uanis(OW5)
Uanis(OW5B) = Uanis(OW1)
4. Others
 Sof(OW4A)=1-FVAR(1)
 Sof(OW4)=Sof(HW4)=FVAR(1)
 Sof(OW5B)=Sof(HW5A)=Sof(HW5B)=0.5*(1-FVAR(3))
 Sof(HW5C)=0.33334*(1-FVAR(3))
 Sof(OW5A)=0.16667*(1-FVAR(3))
 Sof(OW1)=0.5*FVAR(3)
 Sof(HW1)=FVAR(2)
 Sof(OW5)=0.16667*FVAR(4)
 Sof(HW5)=0.33334*FVAR(4)
 Fixed Sof: HW2B(0.5) HW4A(0.56051) HW4B(0.56051)
 Fixed X: HW5C(0.638) HW5A(0.737499) HW5B(0.6975)
 Fixed Y: HW5C(0.362) HW5A(0.2625) HW5B(0.3025)
 Fixed Z: HW5C(0.360701) HW5A(0.490549) HW5B(0.46512)
;
_atom_sites_solution_hydrogens     difmap
_atom_sites_solution_primary       direct
_atom_sites_solution_secondary     ?
loop_
  _atom_site_label
  _atom_site_type_symbol
  _atom_site_fract_x
  _atom_site_fract_y
  _atom_site_fract_z
  _atom_site_U_iso_or_equiv
  _atom_site_adp_type
  _atom_site_occupancy
  _atom_site_site_symmetry_order
  _atom_site_calc_flag
  _atom_site_refinement_flags_posn
  _atom_site_refinement_flags_adp
  _atom_site_refinement_flags_occupancy
  _atom_site_disorder_assembly
  _atom_site_disorder_group
 Na1 Na 0.51663(6) 0.48337(6) 0.82964(7) 0.0070(4) Uani 1 2 d DS T P A .
 Na2 Na 0.54058(7) 0.45942(7) 0.44251(8) 0.0131(4) Uani 1 2 d DS T P . .
 Ca Ca 0.45594(3) 0.54406(3) 0.94394(4) 0.00413(18) Uani 1 2 d S T P A .
 U U 0.55663(2) 0.44337(2) 0.67846(2) 0.00420(7) Uani 1 2 d S T P A .
 C1 C 0.59021(15) 0.40979(15) 0.56575(19) 0.0071(9) Uani 1 2 d S T P A .
 C2 C 0.6832(2) 0.5986(2) 0.73519(13) 0.0049(6) Uani 1 1 d . . . . .
 O1 O 0.59553(11) 0.40447(11) 0.51354(13) 0.0088(4) Uani 1 2 d S T P A .
 O2 O 0.52559(15) 0.35307(15) 0.59583(9) 0.0088(4) Uani 1 1 d . . . . .
 O3 O 0.60320(14) 0.55322(15) 0.75196(9) 0.0079(5) Uani 1 1 d . . . . .
 O4 O 0.69945(15) 0.57427(15) 0.68723(9) 0.0072(5) Uani 1 1 d . . . . .
 O5 O 0.59310(14) 0.58736(14) 0.90360(9) 0.0049(4) Uani 1 1 d . . . . .
 O6 O 0.60695(11) 0.39305(11) 0.71534(13) 0.0103(7) Uani 1 2 d S T P . .
 O7 O 0.50574(11) 0.49426(11) 0.64221(14) 0.0109(7) Uani 1 2 d S T P . .
 OW1 O 0.43997(11) 0.56003(11) 0.83858(14) 0.0049(4) Uani 0.928(5) 2 d DS T P A 1
 HW1 H 0.459(3) 0.6150(13) 0.8367(17) 0.015(11) Uiso 0.928(5) 1 d D . . A 1
 OW2 O 0.58955(11) 0.41045(11) 0.86128(14) 0.0098(7) Uani 1 2 d DS T P A .
 HW2A H 0.598(2) 0.402(2) 0.8967(12) 0.026(18) Uiso 1 2 d DS T P . .
 HW2B H 0.564(4) 0.357(3) 0.845(3) 0.04(3) Uiso 0.5 1 d D . . . .
 OW3 O 0.5924(2) 0.5924(2) 0.500000 0.0116(7) Uani 1 2 d DS T P B .
 HW3 H 0.611(3) 0.6376(19) 0.4778(14) 0.017(11) Uiso 1 1 d D . . . .
 OW4 O 0.4728(2) 0.3219(2) 0.39299(12) 0.0166(8) Uani 0.881(6) 1 d D . . B 2
 HW4 H 0.4155(14) 0.296(4) 0.396(3) 0.06(2) Uiso 0.881(6) 1 d D . . B 2
 OW4A O 0.5289(17) 0.3323(14) 0.3882(9) 0.0166(8) Uani 0.119(6) 1 d D . . B 1
 HW4A H 0.497(3) 0.334(7) 0.3590(11) 0.05(3) Uiso 0.5605 1 d D . . . .
 HW4B H 0.488(2) 0.2806(12) 0.399(2) 0.082 Uiso 0.5605 1 d DR . . . .
 OW5 O 0.666667 0.333333 0.4217(6) 0.089(8) Uani 0.76(3) 6 d DS T P C 1
 HW5 H 0.6946(4) 0.3054(4) 0.434(3) 0.134 Uiso 0.507(19) 2 d DRS T P C 1
 OW5A O 0.666667 0.333333 0.354(4) 0.089(8) Uani 0.072(5) 6 d DS T P A 2
 HW5C H 0.638000 0.362000 0.360701 0.134 Uiso 0.048(4) 2 d DRS T P A 2
 OW5B O 0.7265(14) 0.2735(14) 0.4583(17) 0.0049(4) Uani 0.072(5) 2 d S T P A 2
 HW5A H 0.737499 0.262500 0.490549 0.007 Uiso 0.072(5) 2 d RS T P A 2
 HW5B H 0.697500 0.302500 0.465120 0.007 Uiso 0.072(5) 2 d RS T P A 2

loop_
  _atom_site_aniso_label
  _atom_site_aniso_U_11
  _atom_site_aniso_U_22
  _atom_site_aniso_U_33
  _atom_site_aniso_U_23
  _atom_site_aniso_U_13
  _atom_site_aniso_U_12
 Na1 0.0074(7) 0.0074(7) 0.0065(9) -0.0006(3) 0.0006(3) 0.0039(8)
 Na2 0.0127(7) 0.0127(7) 0.0099(9) 0.0013(4) -0.0013(4) 0.0033(9)
 Ca 0.0038(3) 0.0038(3) 0.0054(4) -0.00008(16) 0.00008(16) 0.0023(4)
 U 0.00330(8) 0.00330(8) 0.00445(9) -0.00037(3) 0.00037(3) 0.00048(7)
 C1 0.0043(16) 0.0043(16) 0.012(2) 0.0006(9) -0.0006(9) 0.0013(19)
 C2 0.0057(15) 0.0032(15) 0.0068(15) 0.0016(12) 0.0005(12) 0.0030(13)
 O1 0.0065(7) 0.0065(7) 0.0079(9) -0.0017(4) 0.0017(4) -0.0009(8)
 O2 0.0065(7) 0.0065(7) 0.0079(9) -0.0017(4) 0.0017(4) -0.0009(8)
 O3 0.0033(11) 0.0067(11) 0.0097(11) -0.0013(9) 0.0018(9) -0.0005(10)
 O4 0.0074(12) 0.0079(12) 0.0046(10) -0.0014(9) 0.0030(9) 0.0024(10)
 O5 0.0033(10) 0.0064(10) 0.0058(9) 0.0002(8) -0.0006(8) 0.0029(8)
 O6 0.0104(13) 0.0104(13) 0.0111(16) 0.0003(7) -0.0003(7) 0.0060(15)
 O7 0.0122(13) 0.0122(13) 0.0111(17) 0.0016(7) -0.0016(7) 0.0081(15)
 OW1 0.0033(10) 0.0064(10) 0.0058(9) 0.0002(8) -0.0006(8) 0.0029(8)
 OW2 0.0094(13) 0.0094(13) 0.0109(18) -0.0003(7) 0.0003(7) 0.0049(15)
 OW3 0.0091(13) 0.0091(13) 0.0129(17) 0.0025(7) -0.0025(7) 0.0017(15)
 OW4 0.020(2) 0.0157(16) 0.0131(14) 0.0015(12) -0.0001(13) 0.0084(15)
 OW4A 0.020(2) 0.0157(16) 0.0131(14) 0.0015(12) -0.0001(13) 0.0084(15)
 OW5 0.112(11) 0.112(11) 0.044(9) 0.000 0.000 0.056(5)
 OW5A 0.112(11) 0.112(11) 0.044(9) 0.000 0.000 0.056(5)
 OW5B 0.0033(10) 0.0064(10) 0.0058(9) 0.0002(8) -0.0006(8) 0.0029(8)

_geom_special_details
;
 All esds (except the esd in the dihedral angle between two l.s. planes)
 are estimated using the full covariance matrix.  The cell esds are taken
 into account individually in the estimation of esds in distances, angles
 and torsion angles; correlations between esds in cell parameters are only
 used when they are defined by crystal symmetry.  An approximate (isotropic)
 treatment of cell esds is used for estimating esds involving l.s. planes.
;
loop_
  _geom_bond_atom_site_label_1
  _geom_bond_atom_site_label_2
  _geom_bond_distance
  _geom_bond_site_symmetry_2
  _geom_bond_publ_flag
 Na1 Ca 3.292(2) . ?
 Na1 U 3.7858(17) . ?
 Na1 O3 2.323(3) . ?
 Na1 O3 2.323(3) 24_665 ?
 Na1 O5 2.416(3) 24_665 ?
 Na1 O5 2.416(3) . ?
 Na1 OW1 2.379(4) . ?
 Na1 OW2 2.375(4) . ?
 Na2 Na2 3.701(4) 19_666 ?
 Na2 U 4.150(2) 19_666 ?
 Na2 O1 2.390(4) . ?
 Na2 O7 2.464(4) 19_666 ?
 Na2 OW3 2.479(3) 19_666 ?
 Na2 OW3 2.479(3) . ?
 Na2 OW4 2.427(3) . ?
 Na2 OW4 2.427(3) 24_665 ?
 Na2 OW4A 2.52(2) 24_665 ?
 Na2 OW4A 2.52(2) . ?
 Ca Ca 3.8024(17) 19_667 ?
 Ca U 3.9521(6) 9_565 ?
 Ca C2 3.195(3) 17_656 ?
 Ca C2 3.195(3) 33_546 ?
 Ca O2 2.304(2) 28 ?
 Ca O2 2.304(2) 8 ?
 Ca O4 2.396(2) 29_455 ?
 Ca O4 2.396(2) 9_565 ?
 Ca O5 2.368(2) . ?
 Ca O5 2.368(2) 24_665 ?
 Ca OW1 2.542(3) . ?
 U O2 2.416(2) 24_665 ?
 U O2 2.416(2) . ?
 U O3 2.435(2) . ?
 U O3 2.435(2) 24_665 ?
 U O4 2.458(2) 24_665 ?
 U O4 2.458(2) . ?
 U O6 1.784(3) . ?
 U O7 1.792(3) . ?
 C1 O1 1.247(5) . ?
 C1 O2 1.301(3) . ?
 C1 O2 1.302(3) 24_665 ?
 C2 O3 1.302(4) . ?
 C2 O4 1.299(4) . ?
 C2 O5 1.255(4) 17_656 ?
 OW5A OW5A 0.97(17) 31_655 ?

loop_
  _geom_angle_atom_site_label_1
  _geom_angle_atom_site_label_2
  _geom_angle_atom_site_label_3
  _geom_angle
  _geom_angle_site_symmetry_1
  _geom_angle_site_symmetry_3
  _geom_angle_publ_flag
 Ca Na1 U 164.32(6) . . ?
 O3 Na1 Ca 135.55(7) 24_665 . ?
 O3 Na1 Ca 135.55(7) . . ?
 O3 Na1 U 38.33(6) . . ?
 O3 Na1 U 38.33(6) 24_665 . ?
 O3 Na1 O3 73.86(12) . 24_665 ?
 O3 Na1 O5 101.11(8) . . ?
 O3 Na1 O5 173.46(11) 24_665 . ?
 O3 Na1 O5 101.11(8) 24_665 24_665 ?
 O3 Na1 O5 173.47(11) . 24_665 ?
 O3 Na1 OW1 100.44(11) 24_665 . ?
 O3 Na1 OW1 100.44(11) . . ?
 O3 Na1 OW2 98.28(11) . . ?
 O3 Na1 OW2 98.28(11) 24_665 . ?
 O5 Na1 Ca 45.92(6) 24_665 . ?
 O5 Na1 Ca 45.92(6) . . ?
 O5 Na1 U 137.93(6) . . ?
 O5 Na1 U 137.93(6) 24_665 . ?
 O5 Na1 O5 83.58(12) . 24_665 ?
 OW1 Na1 Ca 50.16(9) . . ?
 OW1 Na1 U 114.16(10) . . ?
 OW1 Na1 O5 76.13(9) . 24_665 ?
 OW1 Na1 O5 76.13(9) . . ?
 OW2 Na1 Ca 106.36(10) . . ?
 OW2 Na1 U 89.32(10) . . ?
 OW2 Na1 O5 86.48(10) . . ?
 OW2 Na1 O5 86.48(10) . 24_665 ?
 OW2 Na1 OW1 156.52(14) . . ?
 Na2 Na2 U 90.95(7) 19_666 19_666 ?
 O1 Na2 Na2 87.96(10) . 19_666 ?
 O1 Na2 U 178.91(11) . 19_666 ?
 O1 Na2 O7 170.23(15) . 19_666 ?
 O1 Na2 OW3 88.48(8) . . ?
 O1 Na2 OW3 88.48(8) . 19_666 ?
 O1 Na2 OW4 91.39(11) . 24_665 ?
 O1 Na2 OW4 91.39(11) . . ?
 O1 Na2 OW4A 81.7(5) . . ?
 O1 Na2 OW4A 81.7(5) . 24_665 ?
 O7 Na2 Na2 101.81(12) 19_666 19_666 ?
 O7 Na2 U 10.86(8) 19_666 19_666 ?
 O7 Na2 OW3 98.79(9) 19_666 19_666 ?
 O7 Na2 OW3 98.79(9) 19_666 . ?
 O7 Na2 OW4A 89.8(5) 19_666 24_665 ?
 O7 Na2 OW4A 89.8(5) 19_666 . ?
 OW3 Na2 Na2 41.70(7) . 19_666 ?
 OW3 Na2 Na2 41.70(7) 19_666 19_666 ?
 OW3 Na2 U 90.71(5) . 19_666 ?
 OW3 Na2 U 90.71(5) 19_666 19_666 ?
 OW3 Na2 OW3 83.41(14) 19_666 . ?
 OW3 Na2 OW4A 108.1(6) . 24_665 ?
 OW3 Na2 OW4A 164.5(6) 19_666 24_665 ?
 OW3 Na2 OW4A 164.5(6) . . ?
 OW3 Na2 OW4A 108.1(6) 19_666 . ?
 OW4 Na2 OW3 89.29(10) 24_665 . ?
 OW4 Na2 OW3 172.70(12) . . ?
 OW4 Na2 OW3 89.29(10) . 19_666 ?
 OW4 Na2 OW3 172.70(12) 24_665 19_666 ?
 OW4 Na2 OW4 98.01(17) . 24_665 ?
 OW4A Na2 Na2 148.6(6) 24_665 19_666 ?
 OW4A Na2 Na2 148.6(6) . 19_666 ?
 OW4A Na2 U 99.2(5) 24_665 19_666 ?
 OW4A Na2 U 99.2(5) . 19_666 ?
 OW4A Na2 OW4A 58.8(12) 24_665 . ?
 Na1 Ca Ca 99.52(5) . 19_667 ?
 Na1 Ca U 129.430(14) . 9_565 ?
 Ca Ca U 95.45(2) 19_667 9_565 ?
 C2 Ca Na1 59.57(6) 33_546 . ?
 C2 Ca Na1 59.57(6) 17_656 . ?
 C2 Ca Ca 61.54(6) 33_546 19_667 ?
 C2 Ca Ca 61.54(6) 17_656 19_667 ?
 C2 Ca U 87.34(6) 17_656 9_565 ?
 C2 Ca U 156.97(6) 33_546 9_565 ?
 C2 Ca C2 80.87(12) 17_656 33_546 ?
 O2 Ca Na1 105.87(7) 8 . ?
 O2 Ca Na1 105.87(7) 28 . ?
 O2 Ca Ca 127.32(6) 28 19_667 ?
 O2 Ca Ca 127.32(6) 8 19_667 ?
 O2 Ca U 34.03(6) 28 9_565 ?
 O2 Ca U 102.32(7) 8 9_565 ?
 O2 Ca C2 93.46(8) 8 33_546 ?
 O2 Ca C2 93.46(8) 28 17_656 ?
 O2 Ca C2 165.31(8) 8 17_656 ?
 O2 Ca C2 165.31(8) 28 33_546 ?
 O2 Ca O2 88.72(12) 28 8 ?
 O2 Ca O4 123.51(9) 8 9_565 ?
 O2 Ca O4 68.84(8) 8 29_455 ?
 O2 Ca O4 68.84(8) 28 9_565 ?
 O2 Ca O4 123.51(9) 28 29_455 ?
 O2 Ca O5 147.37(8) 28 24_665 ?
 O2 Ca O5 147.37(8) 8 . ?
 O2 Ca O5 83.76(8) 28 . ?
 O2 Ca O5 83.76(8) 8 24_665 ?
 O2 Ca OW1 73.47(8) 28 . ?
 O2 Ca OW1 73.47(8) 8 . ?
 O4 Ca Na1 129.62(6) 29_455 . ?
 O4 Ca Na1 129.62(6) 9_565 . ?
 O4 Ca Ca 59.44(6) 9_565 19_667 ?
 O4 Ca Ca 59.44(6) 29_455 19_667 ?
 O4 Ca U 36.02(6) 9_565 9_565 ?
 O4 Ca U 99.47(6) 29_455 9_565 ?
 O4 Ca C2 70.57(8) 29_455 33_546 ?
 O4 Ca C2 70.57(8) 9_565 17_656 ?
 O4 Ca C2 120.96(8) 9_565 33_546 ?
 O4 Ca C2 120.96(8) 29_455 17_656 ?
 O4 Ca O4 81.54(11) 9_565 29_455 ?
 O4 Ca OW1 137.48(6) 9_565 . ?
 O4 Ca OW1 137.48(6) 29_455 . ?
 O5 Ca Na1 47.13(6) . . ?
 O5 Ca Na1 47.13(6) 24_665 . ?
 O5 Ca Ca 80.95(6) . 19_667 ?
 O5 Ca Ca 80.95(6) 24_665 19_667 ?
 O5 Ca U 88.90(5) . 9_565 ?
 O5 Ca U 173.90(6) 24_665 9_565 ?
 O5 Ca C2 86.62(8) 24_665 17_656 ?
 O5 Ca C2 19.78(7) . 17_656 ?
 O5 Ca C2 86.62(8) . 33_546 ?
 O5 Ca C2 19.78(7) 24_665 33_546 ?
 O5 Ca O4 83.00(8) 24_665 29_455 ?
 O5 Ca O4 140.00(9) . 29_455 ?
 O5 Ca O4 140.00(9) 24_665 9_565 ?
 O5 Ca O4 83.00(8) . 9_565 ?
 O5 Ca O5 85.68(11) . 24_665 ?
 O5 Ca OW1 73.95(8) 24_665 . ?
 O5 Ca OW1 73.95(8) . . ?
 OW1 Ca Na1 45.94(9) . . ?
 OW1 Ca Ca 145.46(9) . 19_667 ?
 OW1 Ca U 107.21(5) . 9_565 ?
 OW1 Ca C2 93.21(8) . 17_656 ?
 OW1 Ca C2 93.21(8) . 33_546 ?
 O2 U O2 53.25(11) 24_665 . ?
 O2 U O3 170.90(8) . . ?
 O2 U O3 118.28(8) 24_665 . ?
 O2 U O3 118.28(8) . 24_665 ?
 O2 U O3 170.90(8) 24_665 24_665 ?
 O2 U O4 66.09(7) 24_665 . ?
 O2 U O4 66.09(7) . 24_665 ?
 O2 U O4 119.04(7) 24_665 24_665 ?
 O2 U O4 119.03(7) . . ?
 O3 U O3 69.93(10) . 24_665 ?
 O3 U O4 53.15(7) 24_665 24_665 ?
 O3 U O4 122.62(7) . 24_665 ?
 O3 U O4 53.15(7) . . ?
 O3 U O4 122.63(7) 24_665 . ?
 O4 U O4 167.03(11) . 24_665 ?
 O6 U O2 93.76(11) . . ?
 O6 U O2 93.76(11) . 24_665 ?
 O6 U O3 90.03(10) . . ?
 O6 U O3 90.03(10) . 24_665 ?
 O6 U O4 83.88(5) . . ?
 O6 U O4 83.88(5) . 24_665 ?
 O6 U O7 179.31(15) . . ?
 O7 U O2 86.85(11) . . ?
 O7 U O2 86.85(11) . 24_665 ?
 O7 U O3 89.40(10) . 24_665 ?
 O7 U O3 89.40(10) . . ?
 O7 U O4 96.10(5) . . ?
 O7 U O4 96.10(5) . 24_665 ?
 O1 C1 O2 123.7(2) . . ?
 O1 C1 O2 123.7(2) . 24_665 ?
 O2 C1 O2 112.6(4) . 24_665 ?
 O4 C2 O3 114.6(3) . . ?
 O5 C2 O3 122.8(3) 17_656 . ?
 O5 C2 O4 122.5(3) 17_656 . ?
 C1 O1 Na2 127.1(3) . . ?
 Ca O2 U 113.71(9) 15_554 . ?
 C1 O2 Ca 148.5(2) . 15_554 ?
 C1 O2 U 96.1(2) . . ?
 Na1 O3 U 105.41(9) . . ?
 C2 O3 Na1 143.4(2) . . ?
 C2 O3 U 96.31(18) . . ?
 Ca O4 U 109.00(9) 14_654 . ?
 C2 O4 Ca 155.3(2) . 14_654 ?
 C2 O4 U 95.33(19) . . ?
 Ca O5 Na1 86.95(8) . . ?
 C2 O5 Na1 119.4(2) 17_656 . ?
 C2 O5 Ca 120.5(2) 17_656 . ?
 U O7 Na2 154.14(19) . 19_666 ?
 Na1 OW1 Ca 83.90(12) . . ?
 Na2 OW3 Na2 96.59(14) 19_666 . ?

loop_
  _geom_torsion_atom_site_label_1
  _geom_torsion_atom_site_label_2
  _geom_torsion_atom_site_label_3
  _geom_torsion_atom_site_label_4
  _geom_torsion
  _geom_torsion_site_symmetry_1
  _geom_torsion_site_symmetry_2
  _geom_torsion_site_symmetry_3
  _geom_torsion_site_symmetry_4
  _geom_torsion_publ_flag
 O1 C1 O2 Ca 34.8(8) . . . 15_554 ?
 O1 C1 O2 U -163.6(4) . . . . ?
 O2 U O7 Na2 -26.67(5) . . . 19_666 ?
 O2 U O7 Na2 26.67(5) 24_665 . . 19_666 ?
 O2 C1 O1 Na2 88.6(4) . . . . ?
 O2 C1 O1 Na2 -88.6(4) 24_665 . . . ?
 O2 C1 O2 Ca -147.8(2) 24_665 . . 15_554 ?
 O2 C1 O2 U 13.8(4) 24_665 . . . ?
 O3 U O7 Na2 -145.03(5) 24_665 . . 19_666 ?
 O3 U O7 Na2 145.03(5) . . . 19_666 ?
 O3 C2 O4 Ca -177.3(3) . . . 14_654 ?
 O3 C2 O4 U -7.4(3) . . . . ?
 O4 U O7 Na2 92.21(5) . . . 19_666 ?
 O4 U O7 Na2 -92.21(5) 24_665 . . 19_666 ?
 O4 C2 O3 Na1 134.2(3) . . . . ?
 O4 C2 O3 U 7.4(3) . . . . ?
 O5 C2 O3 Na1 -45.8(5) 17_656 . . . ?
 O5 C2 O3 U -172.5(3) 17_656 . . . ?
 O5 C2 O4 Ca 2.7(7) 17_656 . . 14_654 ?
 O5 C2 O4 U 172.6(3) 17_656 . . . ?

_shelx_res_file
;
TITL Anders_1 in R-3m #166
    anders_1.res
    created by SHELXL-2018/3 at 01:13:09 on 05-Nov-2018
REM reset to R-3m #166
CELL 0.71073 17.844843 17.844843 23.66881 90 90 120
ZERR 18 0.00042 0.00042 0.000555 0 0 0
LATT 3
SYMM -Y,+X-Y,+Z
SYMM +Y-X,-X,+Z
SYMM -Y+X,-Y,-Z
SYMM -X,-X+Y,-Z
SYMM +Y,+X,-Z
SFAC C H Ca Na O U
UNIT 54 190.11 18 36 293.05 18
EQIV $1 0.333-Y+X,-0.333+X,1.667-Z
EQIV $2 +X,+X-Y,+Z
EQIV $3 1+Y-X,1-X,+Z
DFIX 0.9 OW3 HW3
DFIX 0.9 OW4 HW4
DFIX 0.9 OW4 HW4a
DFIX 0.9 OW4A HW4a
DFIX 3 Na2 HW4b
DFIX 0.9 OW4A HW4b OW4 HW4b
DFIX 1.95 HW4b OW4A_$2
DFIX 2.8 Na1 HW2b
DFIX 0.9 OW2 HW2a
DFIX 0.9 OW2 HW2b
DFIX 1.8 HW2b OW2_$1
DFIX 0.9 OW1 HW1
DFIX 0.9 HW5 OW5
DFIX 1.5 HW5 HW5_$3
DFIX 0.9 HW5c OW5A
EADP OW4A OW4
EADP OW5A OW5
EADP OW5B OW1 O5
EADP O2 O1

L.S. 20
PLAN  20
CONN 3 $C
CONN 8 $U
Htab
list 3
Conf
fmap 2
acta
OMIT -4 55
REM <olex2.extras>
REM <HklSrc "%.\\Anders_1.hkl">
REM </olex2.extras>

WGHT    0.010300   61.448502
EXTI    0.000046
FVAR       0.72507   0.88055   0.92770   0.76068
NA1   4    0.516633    0.483367    0.829642    10.50000    0.00737    0.00737 =
         0.00648   -0.00062    0.00062    0.00391
NA2   4    0.540580    0.459420    0.442514    10.50000    0.01269    0.01269 =
         0.00986    0.00128   -0.00128    0.00327
CA    3    0.455943    0.544057    0.943944    10.50000    0.00379    0.00379 =
         0.00541   -0.00008    0.00008    0.00235
U     6    0.556630    0.443370    0.678460    10.50000    0.00330    0.00330 =
         0.00445   -0.00037    0.00037    0.00048
C1    1    0.590207    0.409793    0.565751    10.50000    0.00435    0.00435 =
         0.01157    0.00057   -0.00057    0.00130
C2    1    0.683200    0.598622    0.735193    11.00000    0.00568    0.00322 =
         0.00675    0.00165    0.00049    0.00299
O1    5    0.595531    0.404469    0.513545    10.50000    0.00649    0.00649 =
         0.00794   -0.00170    0.00170   -0.00091
O2    5    0.525595    0.353071    0.595834    11.00000    0.00649    0.00649 =
         0.00794   -0.00170    0.00170   -0.00091
O3    5    0.603199    0.553219    0.751960    11.00000    0.00329    0.00674 =
         0.00970   -0.00130    0.00185   -0.00053
O4    5    0.699445    0.574275    0.687234    11.00000    0.00735    0.00789 =
         0.00462   -0.00142    0.00298    0.00244
O5    5    0.593103    0.587363    0.903604    11.00000    0.00328    0.00636 =
         0.00576    0.00021   -0.00061    0.00287
O6    5    0.606950    0.393050    0.715343    10.50000    0.01044    0.01044 =
         0.01110    0.00028   -0.00028    0.00596
O7    5    0.505738    0.494262    0.642205    10.50000    0.01219    0.01219 =
         0.01112    0.00163   -0.00163    0.00815
PART 1
OW1   5    0.439966    0.560034    0.838580    30.50000    0.00328    0.00636 =
         0.00576    0.00021   -0.00061    0.00287
HW1   2    0.459150    0.614999    0.836677    31.00000    0.01527
PART 0
OW2   5    0.589553    0.410447    0.861276    10.50000    0.00942    0.00942 =
         0.01094   -0.00032    0.00032    0.00493
HW2A  2    0.597976    0.402024    0.896653    10.50000    0.02598
HW2B  2    0.563696    0.357367    0.844578    10.50000    0.03568
OW3   5    0.592410    0.592410    0.500000    10.50000    0.00913    0.00913 =
         0.01285    0.00249   -0.00249    0.00169
HW3   2    0.610662    0.637631    0.477820    11.00000    0.01741
PART 2
OW4   5    0.472781    0.321911    0.392990    21.00000    0.02026    0.01572 =
         0.01306    0.00146   -0.00012    0.00845
HW4   2    0.415520    0.296105    0.396325    21.00000    0.06009
PART 0
PART 1
OW4A  5    0.528932    0.332292    0.388178   -21.00000    0.02026    0.01572 =
         0.01306    0.00146   -0.00012    0.00845
PART 0
HW4A  2    0.497123    0.333918    0.358959    10.56051    0.05493
HW4B  2    0.488157    0.280604    0.399073    10.56051   -1.50000

PART 1
OW5   5    0.666667    0.333333    0.421704    40.16667    0.11168    0.11168 =
         0.04420    0.00000    0.00000    0.05584
HW5   2    0.694570    0.305430    0.433773    40.33334   -1.50000

PART 0
PART 2
OW5A  5    0.666667    0.333333    0.353887   -30.16667    0.11168    0.11168 =
         0.04420    0.00000    0.00000    0.05584
HW5C  2   10.638000   10.362000   10.360701   -30.33334   -1.50000

OW5B  5    0.726529    0.273471    0.458326   -30.50000    0.00328    0.00636 =
         0.00576    0.00021   -0.00061    0.00287
HW5A  2   10.737499   10.262500   10.490549   -30.50000   -1.50000
HW5B  2   10.697500   10.302500   10.465120   -30.50000   -1.50000
HKLF 4


REM  Anders_1 in R-3m #166
REM wR2 = 0.0397, GooF = S = 1.126, Restrained GooF = 1.125 for all data
REM R1 = 0.0185 for 1697 Fo > 4sig(Fo) and 0.0217 for all 1836 data
REM 151 parameters refined using 16 restraints

END

WGHT      0.0103     61.4328

REM Instructions for potential hydrogen bonds
EQIV $10 -x+y+2/3, -x+4/3, z+1/3
HTAB OW1 O1_$10
EQIV $13 -x+y+2/3, y+1/3, z+1/3
HTAB OW1 O2_$13
EQIV $7 y+1/3, -x+y+2/3, -z+5/3
HTAB OW2 O6_$7
HTAB OW2 O6_$1
HTAB OW2 OW2_$1
EQIV $16 x-y+2/3, -y+4/3, -z+4/3
HTAB OW3 O5_$16
EQIV $17 -x+y+1/3, y-1/3, z-1/3
HTAB OW4 O3_$17
EQIV $18 x-y+1/3, -y+2/3, -z+2/3
HTAB OW4 OW4_$18
HTAB OW4A OW4A_$18
HTAB OW4 OW4_$2
HTAB OW4 OW5B_$3
EQIV $8 -x+y+1/3, -x+2/3, z-1/3
HTAB OW4A OW1_$8
EQIV $19 -y+1, x-y, z
HTAB OW5 OW4A_$19
EQIV $20 -x+y+1, y, z
HTAB OW5 OW4A_$20
HTAB OW5B OW5B_$19
HTAB OW5B OW5B_$3

REM Highest difference peak  1.207,  deepest hole -0.985,  1-sigma level  0.131
Q1    1   0.5125  0.4165  0.6582  11.00000  0.05    0.67
Q2    1   0.6667  0.3333  0.6936  10.16667  0.05    0.67
Q3    1   0.5469  0.4531  0.7103  10.50000  0.05    0.65
Q4    1   0.4659  0.5341  0.8341  10.50000  0.05    0.60
Q5    1   0.5661  0.3711  0.6955  11.00000  0.05    0.57
Q6    1   0.4957  0.4445  0.6723  11.00000  0.05    0.57
Q7    1   0.5079  0.4921  0.6727  10.50000  0.05    0.54
Q8    1   0.5536  0.4464  0.6130  10.50000  0.05    0.53
Q9    1   0.7817  0.5634  0.7209  10.50000  0.05    0.52
Q10   1   0.5650  0.3681  0.5110  11.00000  0.05    0.52
Q11   1   0.5012  0.3566  0.5814  11.00000  0.05    0.50
Q12   1   0.6219  0.5047  0.6835  11.00000  0.05    0.50
Q13   1   0.5270  0.3676  0.6241  11.00000  0.05    0.50
Q14   1   0.5828  0.4172  0.6569  10.50000  0.05    0.48
Q15   1   0.6089  0.5716  0.8881  11.00000  0.05    0.43
Q16   1   0.6011  0.3989  0.6854  10.50000  0.05    0.42
Q17   1   0.6271  0.3729  0.7080  10.50000  0.05    0.40
Q18   1   0.6326  0.3674  0.5007  10.50000  0.05    0.40
Q19   1   0.5863  0.5924  0.7518  11.00000  0.05    0.39
Q20   1   0.7034  0.4067  0.6587  10.50000  0.05    0.39
;
_shelx_res_checksum                93031
_shelx_hkl_file
;
   0   0   3 809561. 15338.9   1
   0   0  -3 774939. 15338.1   1
   0   0   6 273064. 5914.15   1
   0   0  -6 276005. 5912.72   1
   0   0   9 26025.8 1361.14   1
   0   0  -9 25463.6 1003.20   3
   0   0 -12 662344. 13294.7   3
   0   0  12 654963. 14282.7   1
   0   0  15 48931.6 2430.78   1
   0   0 -15 48235.5 1596.51   3
   0   0  18 131926. 4645.19   1
   0   0 -18 123185. 2888.90   3
   0   0 -21 10191.3 1713.64   4
   0   0  21 9523.07 1392.76   1
   0   0  24 73705.8 3919.22   1
   0   0 -24 68411.9 4207.79   4
   0   0  27 159900. 6625.17   1
   0   0 -27 163854. 7118.31   4
   0   0  30 60684.6 4178.04   1
   0   0 -30 64134.9 4510.54   4
   0   0 -33 103715. 6128.68   4
   1   0 -32 42320.2 3857.19   4
   0  -1 -32 49045.4 3994.56   4
  -1   1 -32 42558.8 3750.69   4
   1  -1  32 51233.5 4083.82   1
   1  -1  29 91643.3 5072.31   1
   1   0 -29 81993.9 5145.95   4
   0  -1 -29 85798.1 5074.17   4
  -1   1 -29 91924.3 5303.26   4
  -1   0  29 84664.9 4893.56   1
   1   0 -26 150017. 6803.71   4
   1  -1  26 132043. 5918.26   1
  -1   1 -26 154108. 6743.61   4
  -1   0  26 139786. 5950.99   1
   0   1  26 146565. 6057.42   1
   0  -1 -26 141762. 6358.56   4
   1   0 -23 115221. 5538.42   4
  -1   0  23 112833. 4858.17   1
   1  -1  23 110771. 4910.79   1
   0  -1 -23 110520. 5282.81   4
   0   1  23 113922. 4876.57   1
  -1   1 -23 108730. 5444.34   4
   1  -1  20 51374.8 2911.65   1
   0   1  20 49609.2 2858.41   1
  -1   1 -20 50237.2 3368.72   4
  -1   0  20 47035.4 2746.01   1
  -1   1 -17 166536. 6148.93   4
  -1   1 -17 144419. 4073.78   3
   0   1  17 156420. 5152.70   1
   1   0 -17 153720. 3673.21   3
   1  -1  17 154235. 5189.97   1
  -1   0  17 157302. 5164.26   1
   1  -1  14 52942.7 2527.35   1
  -1   1 -14 55120.7 2025.24   3
   0   1  14 53606.0 2453.97   1
   1   0 -14 51562.2 1769.33   3
  -1   1 -14 54089.9 3168.16   4
  -1   0  14 51113.9 2428.17   1
   0  -1 -14 55460.3 1328.03   2
   1   0 -11 126859. 3359.14   3
  -1   1 -11 137662. 4865.41   4
   1  -1  11 132630. 4025.67   1
   0   1  11 132483. 3919.37   1
  -1   0  11 135804. 3963.93   1
  -1   1 -11 134609. 3479.93   3
   0  -1 -11 130527. 2910.36   2
  -1   0   8 38697.3 1317.35   3
   1  -1   8 40512.4 1682.21   1
   1   0  -8 36579.4 1350.18   3
  -1   1  -8 39105.8 2131.78   4
   0  -1  -8 39561.1 1165.03   2
  -1   0   8 38065.2 1568.63   1
   0   1   8 38558.0 1584.26   1
   0  -1  -5 1053.84 169.001   2
   1  -1   5 646.333 241.293   1
  -1   0   5 1246.20 214.137   3
  -1   0   5 488.595 197.181   1
  -1   1  -5 212.906 287.835   4
   1   0  -5 1300.82 218.526   3
   0   1   5 865.607 252.555   1
   0  -1  -5 1391.75 223.692   1
  -1   1  -5 787.887 205.410   1
   1   0  -5 542.685 185.877   1
  -1   1  -2 80162.2 1855.53   1
   1   0  -2 78317.7 1831.63   3
   1  -1   2 75114.8 1999.01   4
  -1   1  -2 80370.7 2022.09   4
  -1   0   2 74539.8 1810.62   3
   0  -1   4 97987.9 2467.29   3
  -1   0  -4 104984. 2799.27   4
   1  -1  -4 100742. 2353.31   1
  -1   1   4 98014.0 2209.88   2
  -1   0  -4 99811.4 2473.39   1
  -1   1   4 94450.1 2326.30   1
   0   1  -4 100859. 2486.33   1
   0   1  -4 93450.6 2493.74   3
   0  -1   4 96475.6 2468.20   1
   1  -1  -4 95862.6 2157.56   2
   1   0   4 99641.0 2470.10   1
   0  -1   7 190397. 4602.69   1
   0   1  -7 185336. 4471.54   3
  -1   1   7 179761. 4450.01   1
   1  -1  -7 190466. 3908.91   2
   1   0   7 186397. 4585.09   1
   1  -1  -7 198445. 4523.75   1
  -1   1   7 184805. 4051.34   2
  -1   0 -10 232137. 4818.19   2
  -1   1  10 225575. 5752.86   1
   1   0  10 231700. 5876.20   1
   0   1 -10 236367. 5593.99   3
   0  -1  10 226365. 5878.98   1
   1  -1 -10 239076. 4781.24   2
  -1   1  13 311848. 7762.44   1
   1   0  13 300424. 7853.18   1
   0  -1  13 311057. 7955.54   1
   0   1 -13 318919. 7307.32   3
  -1   0 -13 323146. 6806.32   3
  -1   1  16 171914. 5390.30   1
   0  -1  16 180531. 5577.59   1
  -1   0 -16 179819. 6244.54   4
   1   0  16 175586. 5528.12   1
  -1   0 -16 178634. 4127.88   3
   0   1 -16 169571. 4633.38   3
   0   1 -16 182465. 6488.77   4
   1   0  19 99537.9 4140.33   1
  -1   0 -19 107466. 4851.22   4
  -1   1  19 101312. 4102.03   1
   0   1 -19 106889. 4964.18   4
   0  -1  19 105119. 4250.36   1
   1   0  22 78822.7 3913.18   1
   0   1 -22 72597.9 4341.50   4
   0  -1  22 72724.4 3812.12   1
  -1   0 -22 83919.2 4405.99   4
  -1   1  22 77022.8 3796.42   1
   0   1 -25 76730.1 4668.13   4
   1   0  25 87305.1 4414.85   1
   0  -1  25 82915.6 4329.19   1
   1  -1 -25 78048.1 4539.63   4
  -1   0 -25 80300.2 4597.42   4
  -1   1  25 83308.6 4278.23   1
  -1   0 -28 29528.7 2875.71   4
   0  -1  28 29689.3 2761.78   1
  -1   1  28 32335.3 2843.19   1
   1  -1 -28 30817.8 3015.48   4
   0   1 -28 28292.9 3006.63   4
   1   0  28 29244.9 2742.47   1
   0  -1  31 23445.5 2787.94   1
   0   1 -31 20966.4 2738.99   4
  -1   0 -31 21818.0 2719.32   4
   1  -1 -31 20344.0 2758.89   4
   1   1   0 10538.3 566.253   3
  -1   2   0 10197.4 522.083   2
  -1   2   0 9783.25 455.151   4
   1  -2   0 10119.4 464.509   4
   1  -2   0 9986.55 515.923   2
  -1  -1   0 10398.6 573.226   3
   1  -2   3 2752.15 319.773   1
  -1  -1   3 1142.49 256.561   3
  -1   2  -3 617.587 141.662   2
   1   1  -3 600.703 216.538   3
   2  -1   3 284.629 184.391   4
   1  -2  -3 811.312 211.494   2
  -2   1   3 448.564 108.306   1
  -2   1  -3 911.787 215.754   4
  -1   2  -3 2101.83 368.440   4
   2  -1  -3 635.792 114.225   1
   2  -1   3 364.040 166.036   1
   1  -2   3 772.364 154.999   2
  -1   2   3 1061.33 209.687   2
  -1  -1  -3 797.461 167.559   3
  -2   1  -3 437.251 139.770   1
   1  -2   3 404.226 213.798   4
   1  -2   6 1842.08 367.456   1
   1  -2  -6 2465.79 330.718   1
  -1  -1   6 1925.45 323.409   1
  -1   2   6 1572.72 280.526   2
   2  -1   6 1158.70 322.524   1
  -1   2  -6 2155.43 590.623   4
   1  -2  -6 1657.34 250.796   2
  -2   1  -6 1579.79 416.251   4
   1   1  -6 1532.31 346.291   3
  -1   2  -6 1640.24 322.620   1
  -2   1   6 2224.75 265.952   3
  -2   1  -6 1500.60 314.722   1
  -1  -1  -6 4116.05 414.596   1
  -2   1   6 2571.60 254.253   2
  -2   1   6 1432.14 273.428   1
   1   1  -6 2089.94 340.750   1
   2  -1  -6 1466.64 253.140   1
   1   1   6 2907.95 420.276   1
  -1  -1   6 1764.38 316.015   3
  -2   1   9 2486.69 279.442   2
  -2   1   9 2748.47 462.561   1
  -1   2   9 3335.10 526.843   1
   1  -2   9 2267.80 494.818   1
  -1  -1   9 2833.17 476.886   1
   1   1  -9 3313.47 477.377   3
  -2   1  -9 2684.90 649.399   4
   1  -2  -9 2606.37 303.732   2
  -2   1   9 3237.32 349.237   3
   1   1   9 2723.10 502.210   1
   2  -1   9 2669.61 466.368   1
  -1   2  -9 3421.20 479.852   3
  -1  -1   9 2942.72 453.862   3
  -1   2  -9 2551.18 760.198   4
   1   1  12 12454.7 1084.99   1
  -2   1  12 11825.4 625.079   2
  -1   2 -12 12732.6 968.906   3
  -2   1 -12 12364.1 1485.40   4
  -1   2 -12 13623.8 1587.81   4
  -2   1  12 13164.6 1054.46   1
  -1   2  12 13309.2 1079.19   1
  -1  -1 -12 11575.0 664.866   2
   1  -2 -12 12511.5 643.287   2
  -2   1  12 12834.1 700.056   3
   2  -1  12 12797.8 1128.01   1
  -1  -1  12 14237.3 1147.98   1
   1  -2  12 13972.3 1194.08   1
   1   1 -12 13836.0 1003.32   3
  -2   1 -15 9536.63 1329.95   4
   1  -2 -15 8856.13 496.809   2
   1   1  15 9437.13 1111.83   1
  -1   2 -15 11370.5 1614.59   4
  -2   1 -15 9704.59 751.495   3
   1  -2  15 10955.5 1281.24   1
   2  -1  15 8978.71 1080.82   1
  -2   1  15 8576.58 1003.66   1
  -1  -1  15 9016.15 1121.83   1
  -1   2  15 10104.4 1132.16   1
   1   1 -15 8850.48 820.325   3
  -1  -1 -15 9058.24 484.866   2
   2  -1  18 439.147 700.419   1
  -2   1 -18-162.370 825.924   4
  -1   2  18-406.316 583.457   1
   1  -2  18 317.660 649.628   1
  -1  -1  18 318.986 622.959   1
  -2   1  18 499.253 611.309   1
   1   1  18 1318.88 709.293   1
  -1   2 -18 1274.18 1015.48   4
  -1  -1 -18 370.970 835.277   4
  -1  -1  21 1252.63 787.130   1
  -1  -1 -21 2942.32 1088.97   4
  -1   2  21 2443.83 924.916   1
   1  -2  21 985.166 781.044   1
  -1   2 -21 3426.25 1253.34   4
  -2   1  21 3048.03 954.956   1
  -2   1 -21 2528.55 1078.19   4
   1   1 -21 1869.83 1001.84   4
   1   1  21 1649.01 868.350   1
   2  -1  21 2965.98 1015.25   1
  -2   1 -24 1653.21 1134.03   4
  -1  -1 -24-1.49341 801.887   4
  -1  -1  24 941.591 834.211   1
  -1   2  24 900.987 947.093   1
  -2   1  24 662.195 778.833   1
   2  -1  24 2068.21 1096.67   1
   1   1 -24 356.823 1014.36   4
   1   1  24 762.060 908.365   1
   1  -2  24-185.196 912.019   1
  -1   2 -24-1010.70 1180.11   4
   2  -1  27 2636.79 1438.08   1
  -2   1 -27 1626.93 1061.94   4
   1  -2 -27 405.092 989.613   4
  -1  -1  27 4808.46 1387.72   1
  -2   1  27 2225.55 1110.26   1
  -1   2 -27 43.6086 1084.57   4
   2  -1 -27 1479.07 1058.11   4
   1   1 -27 1546.06 1279.52   4
   1  -2  27 1796.05 1086.66   1
  -1  -1 -27 2871.80 1282.72   4
   1  -2 -30-1556.68 1276.97   4
  -1   2 -30 889.210 1198.19   4
  -1  -1  30 1713.50 1270.84   1
  -2   1 -30-722.255 995.749   4
   2  -1  30 1273.88 1394.53   1
   1  -2  30-122.557 1153.19   1
  -1  -1 -30-643.026 1199.31   4
   2  -1 -30 363.699 1117.95   4
   1   1 -30 663.129 1232.20   4
   2  -1 -33 1027.24 1571.09   4
  -2   1 -33 517.414 1045.94   4
  -1   2 -33-1564.80 1488.78   4
   1  -2 -33 1773.61 1304.64   4
   2  -2  31 63672.4 4506.74   1
  -2   2 -31 57634.1 4326.42   4
   0  -2 -31 63551.2 4419.65   4
  -2   0  31 62402.8 4335.97   1
   2   0 -31 59541.8 4601.48   4
   0  -2 -28 44882.3 3535.67   4
  -2   0  28 48266.8 3522.13   1
  -2   2 -28 43423.7 3619.29   4
   2  -2  28 49778.2 3632.81   1
   2   0 -28 44412.2 3713.28   4
  -2   0  25 43027.4 3045.85   1
   2   0 -25 50293.9 3709.73   4
  -2   2 -25 45777.4 3542.89   4
   0  -2 -25 50351.9 3517.30   4
   2  -2  25 53250.7 3480.07   1
   2  -2  22 73439.5 3804.44   1
  -2   2 -22 71748.4 4251.72   4
   0   2  22 67583.1 3539.33   1
  -2   0  22 68231.9 3566.54   1
   0  -2 -22 69252.3 3846.65   4
   2  -2  19 73948.5 3524.00   1
  -2   0  19 79015.1 3521.78   1
   0   2  19 70731.3 3384.85   1
  -2   2 -19 74146.6 4207.62   4
   0  -2 -16 91003.9 2286.26   2
   2  -2  16 92039.4 3764.56   1
  -2   0  16 95102.2 3609.11   1
   0   2  16 87516.9 3539.99   1
  -2   2 -16 93858.8 4495.38   4
  -2   0  13 10377.2 999.112   1
   2  -2  13 10148.8 1120.33   1
   0  -2 -13 10973.9 659.182   2
   2   0 -13 11948.4 803.246   3
  -2   2 -13 12589.0 1503.64   4
   0   2  13 10067.5 1093.71   1
  -2   0  13 11747.7 493.027   2
  -2   0  13 13105.4 864.595   3
  -2   2 -13 11291.6 883.437   3
  -2   2 -10 47796.7 2713.07   4
  -2   0  10 51319.6 1368.93   2
  -2   0  10 48959.1 1788.78   3
   2  -2  10 50846.4 2176.22   1
   2   0 -10 48749.0 1752.45   3
   0  -2 -10 51076.4 1666.33   2
   0   2  10 54135.6 2113.54   1
  -2   0  10 50665.3 2042.36   1
  -2   2  -7 44391.5 1165.55   2
   0  -2  -7 46386.5 1618.38   2
  -2   2  -7 47396.8 2211.32   4
   2   0  -7 42853.3 1584.90   1
  -2   0   7 43540.7 1573.93   3
   2  -2   7 47115.3 1782.39   1
   2   0  -7 43697.6 1551.70   3
  -2   0   7 42578.1 1577.55   1
   2  -2   4 29631.9 1118.49   1
   0  -2  -4 29766.7 955.711   3
   2  -2   4 27332.2 1303.09   4
  -2   2  -4 25963.9 849.561   2
   2   0  -4 29699.5 989.114   1
  -2   0   4 27512.8 1077.03   3
  -2   2  -4 25184.6 1252.86   4
  -2   0   4 25810.6 942.563   1
   2   0  -4 27364.9 1069.49   3
   0   2   4 26724.2 876.714   3
  -2   2  -4 28412.7 1109.34   1
   2  -2   1 21706.9 828.210   4
   2  -2   1 23008.6 787.987   2
   0   2   1 21862.3 917.118   3
   0  -2  -1 22540.3 930.535   3
   2  -2   1 22190.4 753.173   1
  -2   2  -1 21110.4 810.293   4
  -2   2  -1 20943.5 767.227   2
  -2   2   2 119497. 2798.98   2
   0   2  -2 119182. 3167.74   3
   0  -2   2 122895. 3202.59   4
   2  -2  -2 125112. 2799.54   2
   0  -2   2 120743. 3133.77   3
  -2   0  -2 115366. 2683.07   1
   0   2  -2 127633. 3202.54   4
   2  -2  -5 309193. 6351.82   1
  -2   0  -5 307163. 6848.25   4
   0   2  -5 292623. 6909.94   3
  -2   2   5 298794. 6352.28   1
  -2   0  -5 318798. 6644.57   1
   0  -2   5 307434. 6798.11   1
  -2   2   5 309768. 6414.90   2
   2  -2  -5 288974. 6315.94   2
   0   2  -5 302845. 7580.54   4
   0  -2   5 310842. 6864.95   3
   2   0   5 328444. 6683.58   1
   2  -2  -8 248112. 5269.31   2
  -2   0  -8 243443. 6500.27   4
   2   0   8 254254. 5955.35   1
  -2   2   8 244644. 5427.58   2
   0   2  -8 247978. 6048.07   3
  -2   2   8 241379. 5022.42   3
   0   2  -8 246831. 7011.35   4
   0  -2   8 254862. 6004.42   1
  -2   2   8 249801. 5673.93   1
   0   2 -11 75138.4 2712.24   3
   0  -2  11 74948.3 2814.52   1
  -2   2  11 71602.0 2564.92   1
  -2   2  11 70119.1 2195.43   2
   2   0  11 71041.7 2713.68   1
   2  -2 -11 75687.5 1973.94   2
   0   2 -11 80468.8 3655.77   4
  -2   0 -11 77632.4 3295.82   4
   0   2 -14 267114. 8100.25   4
  -2   2  14 249785. 6534.21   1
  -2   0 -14 244440. 5268.56   2
   2   0  14 251512. 6766.92   1
   0  -2  14 251831. 6860.63   1
  -2   0 -17 98822.3 4516.34   4
  -2   2  17 103424. 3860.15   1
   0  -2  17 100494. 4081.36   1
  -2   0 -17 100915. 2714.86   3
   2   0  17 102593. 3979.92   1
   0   2 -17 105706. 5034.90   4
  -2   0 -20 57060.6 3524.82   4
   2   0  20 56536.4 3093.74   1
   0  -2  20 55848.0 3147.83   1
  -2   2  20 55435.8 2979.17   1
   0   2 -20 63786.4 3940.00   4
   0  -2  23 35872.2 2674.03   1
  -2   0 -23 34735.5 2833.09   4
   0   2 -23 34975.9 3106.19   4
  -2   2  23 35005.5 2559.28   1
   2   0  23 34262.3 2600.43   1
   0   2 -26 112745. 5836.32   4
   2   0  26 104142. 5107.37   1
  -2   0 -26 106838. 5369.87   4
   0  -2  26 107036. 5201.08   1
   2  -2 -26 107551. 5511.22   4
   0  -2  29 4372.05 1384.08   1
   2  -2 -29 7179.88 1779.12   4
   0   2 -29 3049.87 1443.95   4
  -2   0 -29 5548.52 1408.99   4
   0  -2  32-901.694 1217.57   1
  -2   0 -32-1070.39 1119.70   4
   2  -2 -32-97.4291 1244.85   4
   0   2 -32 2890.44 1682.41   4
  -2  -1  32 50391.7 4049.43   1
   3  -1 -32 45747.7 4231.70   4
  -2   3 -32 43903.0 4010.69   4
  -3   2 -32 44814.7 3811.69   4
   1  -3 -32 50982.5 4104.91   4
   2   1 -32 53010.8 4434.86   4
   2  -3  32 52353.6 4219.81   1
   3  -2  29 51953.6 3854.55   1
  -3   2 -29 46917.7 3883.05   4
  -3   1  29 53236.7 3721.55   1
   1  -3 -29 53183.9 3985.55   4
   2  -3  29 51116.3 3870.75   1
  -2   3 -29 50060.6 4045.31   4
   3  -1 -29 49460.0 4052.80   4
  -1  -2 -29 54486.2 3848.88   4
  -2  -1  29 51620.0 3764.42   1
   2   1 -29 55558.1 4335.81   4
  -2  -1  26 1351.76 1041.95   1
   3  -2  26 3864.32 1354.57   1
  -3   2 -26 3128.46 1289.27   4
   2   1 -26 2861.80 1287.19   4
   2  -3  26 4056.59 1286.70   1
   1  -3 -26 2961.95 1164.02   4
  -2   3 -26 4737.33 1595.59   4
  -1  -2 -26 3031.45 1179.88   4
  -3   1  26 2350.53 1005.26   1
   2  -3  23 3448.67 1115.37   1
  -3   2 -23 2677.76 1162.38   4
   3  -2  23 1722.80 921.178   1
  -1  -2 -23 388.916 803.964   4
  -3   1  23 2724.93 1076.46   1
   2   1 -23 2704.95 1212.07   4
  -2  -1  23 2117.07 1056.98   1
  -2   3 -23 1938.79 980.637   4
  -2   3 -20 4923.05 1332.77   4
  -1  -2 -20 3945.36 947.281   4
  -3   1  20 3547.31 917.584   1
   3  -2  20 3379.30 1039.70   1
   2  -3  20 6791.38 1328.35   1
  -2  -1  20 4956.06 1099.63   1
  -3   2 -20 3514.70 1051.18   4
   1  -3 -17 13272.3 712.167   2
  -3   1  17 14120.7 1297.45   1
   1   2  17 12887.9 1332.28   1
  -3   2 -17 12344.7 1605.61   4
  -2   3 -17 13836.3 1788.61   4
   3  -2  17 12115.0 1352.87   1
   2  -3  17 14363.4 1514.61   1
  -2  -1  17 13575.2 1400.23   1
  -1  -2 -17 11854.6 688.062   2
  -2  -1  14 3599.03 807.039   1
   3  -2  14 3852.74 802.650   1
   2  -3  14 4108.84 868.621   1
  -2   3 -14 2801.25 853.117   4
  -3   1  14 3303.51 362.771   2
   1  -3 -14 3889.24 433.483   2
  -3   1  14 2503.68 590.009   1
  -1  -2 -14 4004.51 471.036   2
  -3   1  14 2821.06 449.983   3
   1   2  14 4273.16 804.083   1
  -3   2 -14 3250.58 224.791   2
  -3   2 -14 3991.45 958.085   4
  -2  -1  11 24203.7 1345.65   3
  -2   3 -11 22809.6 1973.86   4
   3  -2  11 25523.5 1556.46   1
  -1  -2 -11 23839.2 1237.44   2
   1  -3 -11 25392.3 1112.35   2
  -3   2 -11 23782.4 835.421   2
  -3   1  11 23664.1 969.170   2
  -2  -1  11 25849.5 1466.51   1
   2   1 -11 25452.3 1422.34   3
   2  -3  11 23422.8 1552.26   1
  -3   1  11 23054.5 1328.87   1
  -3   2 -11 25297.4 1957.91   4
  -3   1  11 22643.3 1135.91   3
  -2   3  -8 188472. 5783.63   4
  -1  -2  -8 187552. 4166.56   3
  -3   1   8 186974. 4587.24   1
   3  -1  -8 185840. 4567.48   1
  -3   1   8 182235. 4495.15   3
   2   1  -8 184751. 4937.45   3
  -3   2  -8 198756. 5524.89   4
   2  -3   8 190143. 4977.65   1
   3  -2   8 197537. 4965.60   1
  -2  -1   8 188079. 4842.58   3
  -2  -1   8 189421. 4784.25   1
   1  -3  -8 198379. 4583.37   2
  -3   1   8 191094. 4252.54   2
  -2   3  -8 192242. 4102.94   2
   3  -2   5 304767. 6610.14   1
   3  -2   5 283561. 6923.57   4
  -3   1   5 300998. 6384.40   3
  -2   3  -5 291945. 6227.58   2
  -3   2  -5 296801. 6603.43   1
  -2   3  -5 292123. 7176.83   4
  -2  -1   5 299357. 6568.58   1
   2   1  -5 301130. 6912.83   3
  -2   3  -5 305472. 6734.02   1
   2  -3   5 309359. 6211.40   2
  -3   1   5 293702. 6203.95   1
   2  -3   5 308494. 6736.39   1
  -3   2  -5 298334. 6838.46   4
  -1   3   5 305387. 6223.84   3
   3  -1  -5 298289. 6203.08   1
  -2  -1   5 285888. 6767.39   3
   2  -3   5 307256. 7283.96   4
  -1  -2  -5 298117. 6379.54   3
   1  -3  -5 295727. 6630.57   2
  -2  -1   2 308379. 6748.71   3
  -2   3  -2 308768. 6619.87   4
  -1  -2  -2 298793. 6630.93   3
  -3   2  -2 301150. 6260.92   1
   3  -2   2 307172. 6252.66   1
  -1   3   2 304322. 6780.00   2
   2  -3   2 301849. 6638.46   4
   2   1  -2 307246. 6760.82   3
   3  -2   2 306410. 6464.94   4
  -2   3  -2 301479. 6406.44   2
   1   2   2 308584. 6593.46   3
   1  -3  -2 298969. 6702.30   2
   2  -3   2 308410. 6412.07   2
  -3   2  -2 306859. 6410.43   4
  -1   3   2 300047. 6520.43   3
  -1   3  -1 319216. 6976.70   2
  -1   3  -1 322787. 7040.95   3
   2  -3  -1 336654. 6841.75   2
   1   2  -1 327513. 7191.42   3
  -3   1  -1 336007. 6415.00   1
  -2   3   1 320745. 6845.22   2
  -1  -2   1 332434. 7152.58   3
   1  -3   1 313279. 6806.57   4
  -2  -1  -1 332261. 6863.75   3
   3  -1   1 312578. 6370.40   1
   1  -3   1 325651. 6941.54   2
  -1   3  -1 328482. 6805.17   4
  -3   1  -4 267179. 5819.59   4
  -3   1  -4 282707. 5938.95   1
   1  -3   4 271486. 5805.58   2
   1  -3   4 271052. 6575.15   4
   3  -2  -4 254274. 5461.94   1
  -2  -1  -4 274970. 5631.16   4
   1   2  -4 272223. 6433.34   3
  -1  -2   4 272830. 6347.89   3
   3  -1   4 277591. 6011.70   4
  -2   3   4 278679. 6000.47   2
   3  -1   4 278573. 5873.53   1
  -2  -1  -4 274175. 5823.96   1
  -3   2   4 265899. 5432.59   1
  -1   3  -4 270151. 6260.44   3
  -3   2   4 263722. 5741.47   2
  -1   3  -4 271969. 6601.10   4
   2  -3  -4 258860. 5863.11   2
  -2  -1  -7 159703. 4357.67   4
  -1  -2   7 159957. 4242.93   1
   3  -1   7 159600. 4597.81   4
  -1   3  -7 157794. 5089.32   4
  -3   2   7 163058. 3784.89   2
  -3   1  -7 163195. 4460.46   4
  -1   3  -7 167382. 4403.75   3
   2  -3  -7 158833. 3838.96   2
   3  -2  -7 170004. 3891.60   1
   1  -3   7 162420. 3568.21   2
   2  -3  -7 155305. 3844.18   1
  -1  -2   7 160107. 4349.28   3
  -2   3   7 163070. 4057.50   2
   1  -3   7 149999. 4261.67   1
   1   2  -7 156868. 4470.77   3
  -3   2   7 162090. 3832.88   1
   3  -1   7 160044. 4178.85   1
  -1   3 -10 391169. 10419.4   4
  -1  -2  10 386510. 8974.72   1
  -2  -1 -10 404797. 9475.60   4
   1  -3  10 388924. 7599.99   2
   3  -1  10 395917. 9008.32   1
  -1  -2  10 385156. 8881.61   3
   2  -3 -10 392916. 8176.87   2
  -3   2  10 366506. 8543.87   1
   2   1  10 395189. 9001.83   1
  -2   3  10 392091. 8571.92   2
  -3   1 -10 379560. 9716.58   4
  -3   2  10 381244. 8074.84   3
   1  -3  10 389267. 9090.88   1
  -3   2  10 387423. 8163.56   2
  -1  -2  13 304177. 7772.47   1
   2   1  13 292355. 7665.14   1
  -3   2  13 301822. 6610.34   2
  -3   1 -13 286379. 8439.43   4
   2  -3 -13 310275. 6499.06   2
  -3   2  13 289827. 6382.95   3
   1  -3  13 306106. 7883.79   1
  -1   3 -13 279778. 8992.28   4
  -2   3  13 298116. 7452.39   1
  -3   2  13 299195. 7367.42   1
   3  -1  13 303988. 7724.31   1
  -2  -1 -13 312138. 8263.89   4
   1  -3  16 43674.3 2527.40   1
  -2  -1 -16 44161.4 1196.07   3
  -2  -1 -16 41966.6 2713.88   4
   3  -1  16 45195.3 2499.24   1
  -2   3  16 43955.8 2317.74   1
  -2  -1 -16 42846.5 1271.38   3
   2   1  16 44869.7 2421.10   1
  -3   1 -16 38776.4 2737.60   4
  -3   2  16 40376.8 2199.29   1
  -2  -1 -16 44521.7 1492.49   2
  -1   3 -16 45588.0 3179.52   4
  -1  -2  16 40352.7 2400.75   1
  -3   1 -16 41780.0 1191.97   2
  -3   1 -16 43678.1 1116.25   2
   3  -1  19 3472.24 983.794   1
  -2  -1 -19 2993.59 1020.05   4
  -3   2  19 2236.68 745.117   1
  -1  -2  19 2883.01 931.228   1
   1  -3  19 2269.91 913.011   1
  -2   3  19 1338.06 704.355   1
   2   1  19 1637.21 860.049   1
  -1   3 -19 3595.23 1390.01   4
  -3   1 -19 2804.39 1098.26   4
   1   2 -19 2609.15 1219.54   4
  -1   3 -22 2260.26 1282.92   4
  -2  -1 -22-279.630 724.877   4
  -1  -2  22-72.1283 815.759   1
   1  -3  22 664.659 802.450   1
   2   1  22 43.1630 821.802   1
   1   2 -22 1434.96 1086.52   4
  -3   1 -22-255.234 905.025   4
  -3   2  22-55.9598 692.993   1
   3  -1  22 419.078 801.149   1
  -1  -2  25 755.170 948.943   1
   1   2 -25 1205.01 1146.54   4
   3  -1  25 1769.01 1036.58   1
  -3   1 -25-876.775 1094.69   4
  -3   2  25 2204.09 1042.80   1
  -2  -1 -25 1256.85 912.854   4
   1  -3  25 772.409 891.458   1
  -1   3 -25 3117.78 1390.11   4
   3  -2 -28 6570.24 1641.74   4
  -1   3 -28 5491.36 1531.18   4
  -3   1 -28 5082.56 1400.30   4
  -1  -2  28 5784.22 1516.89   1
   1  -3  28 7857.46 1616.45   1
   2  -3 -28 5953.44 1561.95   4
  -2  -1 -28 5221.05 1387.49   4
   1   2 -28 6900.17 1820.23   4
   3  -1  28 8201.21 1733.01   1
  -1   3 -31 7090.63 2038.86   4
   1   2 -31 8055.22 1975.53   4
  -2  -1 -31 10650.5 1899.14   4
   1  -3  31 8822.43 2027.73   1
  -3   1 -31 7906.26 1874.06   4
   3  -2 -31 9624.82 2043.30   4
   2  -3 -31 8371.06 1871.05   4
  -1  -2  31 6629.33 1842.85   1
  -3   0  33 415.015 1047.44   1
  -3   3 -33-783.323 1196.13   4
  -3   3 -30 11286.9 2036.63   4
   0  -3 -30 9595.91 1861.08   4
   3  -3  30 13817.8 2286.35   1
   3   0 -30 12026.1 2162.75   4
  -3   0  30 13014.3 2064.63   1
   3  -3  27 101703. 5214.78   1
   0  -3 -27 93874.5 5060.11   4
   3   0 -27 94829.5 5531.67   4
  -3   0  27 102172. 5096.05   1
  -3   3 -27 99330.0 5537.90   4
   0  -3 -24 148797. 6088.69   4
   3  -3  24 151614. 6139.36   1
  -3   3 -24 158684. 6904.69   4
  -3   0  24 150808. 5937.12   1
  -3   3 -21 363947. 11123.9   4
  -3   0  21 343031. 9715.87   1
   3  -3  21 346334. 9997.11   1
   3  -3  18 479653. 11528.3   1
  -3   3 -18 464557. 12842.8   4
  -3   0  18 468930. 11155.3   1
  -3   0  15 334953. 8484.68   1
  -3   0  15 331365. 7770.37   3
   0  -3 -15 338987. 7294.54   2
  -3   3 -15 313471. 9829.28   4
   3  -3  15 343417. 8849.47   1
  -3   0  15 327849. 6825.15   2
   3  -3  12 419410. 9846.53   1
   0  -3 -12 435342. 8887.30   2
  -3   0  12 414949. 9445.29   1
  -3   3 -12 406334. 10919.6   4
  -3   3 -12 396191. 8046.36   2
  -3   0  12 388763. 8301.78   2
  -3   0  12 412101. 9122.34   3
   0  -3  -9 314884. 7018.45   2
  -3   0   9 288681. 6906.09   3
   3  -3   9 301839. 7279.39   1
  -3   3  -9 306971. 8100.33   4
   3   0  -9 277658. 6793.56   3
  -3   0   9 301069. 6903.13   1
  -3   3  -9 304068. 6198.96   2
  -3   0   6 742551. 15166.6   3
  -3   0   6 770081. 14884.7   1
   3  -3   6 749857. 15217.4   1
  -3   3  -6 746571. 15787.5   4
   0   3   6 716337. 14575.5   3
   0  -3  -6 748739. 14722.2   3
  -3   3  -6 744518. 14608.8   2
   0  -3  -3 648494. 13240.1   3
  -3   3  -3 638339. 13215.2   4
  -3   0   3 655656. 13159.9   3
   3  -3   3 670686. 12921.8   2
   0   3   3 638481. 13143.0   3
   3  -3   3 672798. 13036.9   1
   3  -3   3 623521. 13275.1   4
  -3   3  -3 637272. 12895.2   2
  -3   3  -3 651977. 13040.3   1
   0   3   0 504817. 10682.9   3
   3  -3   0 510451. 10221.9   2
  -3   3   0 497185. 10206.9   2
   3  -3   0 512911. 10263.3   4
   0   3   0 506516. 10077.7   4
   0  -3   0 498145. 10702.4   3
   0  -3   0 494270. 10109.3   4
  -3   3   3 28149.4 1132.25   2
  -3   0  -3 27496.1 1018.34   1
   0  -3   3 27820.2 1393.79   3
  -3   0  -3 28313.4 843.749   4
   3  -3  -3 26504.1 1087.42   2
   0   3  -3 27695.5 1408.06   4
   0   3  -3 28951.9 1431.75   3
   3   0   3 28120.9 927.217   4
   0  -3   3 26765.5 1419.49   4
  -3   3   6 4386.84 451.245   2
   3   0   6 4696.35 541.905   1
   0  -3   6 3775.02 561.448   1
   0  -3   6 4888.01 644.675   3
   0   3  -6 5374.82 881.995   4
   3  -3  -6 4805.19 397.571   1
   0   3  -6 4938.78 672.532   3
   3  -3  -6 4257.30 432.865   2
  -3   0  -6 4268.07 468.838   4
  -3   3   9 41932.7 1593.56   2
  -3   0  -9 43242.1 2074.83   4
   0  -3   9 40215.5 1929.22   1
  -3   3   9 44103.3 1652.48   1
   3  -3  -9 41747.1 1467.59   2
   0  -3   9 40016.5 1331.89   2
   3   0   9 44449.7 1894.63   1
   0   3  -9 40898.5 2546.71   4
   0  -3  12 95809.3 3408.17   1
  -3   3  12 89505.1 2710.23   2
  -3   3  12 85700.4 2082.58   3
   0   3 -12 80283.9 4158.39   4
  -3   0 -12 84001.5 3580.50   4
   3   0  12 89184.7 3228.90   1
   3  -3 -12 89752.7 2449.50   2
  -3   3  12 86880.6 2978.65   1
   3   0  15 40058.4 2229.38   1
   0   3 -15 44348.0 3087.00   4
   0  -3  15 39765.5 2334.86   1
  -3   3  15 37903.7 2037.71   1
  -3   0 -15 38378.7 2497.15   4
  -3   3  18 87166.0 3579.75   1
   0  -3  18 88167.1 3908.45   1
  -3   0 -18 84546.5 4120.71   4
   0   3 -18 97288.3 4898.63   4
  -3   0 -18 85152.1 2132.02   2
   3   0  18 88134.5 3803.10   1
   3   0  21 412505. 11116.6   1
  -3   3  21 408708. 10805.9   1
   0   3 -21 406375. 12680.4   4
   0  -3  21 419114. 11428.3   1
  -3   0 -21 407687. 11604.4   4
   0   3 -24 378937. 11891.5   4
   3   0  24 357103. 10475.8   1
   0  -3  24 343017. 10625.1   1
  -3   0 -24 343372. 10739.2   4
   0   3 -27 336326. 11602.5   4
  -3   0 -27 328646. 10645.6   4
   0  -3  27 325420. 10634.2   1
   3  -3 -30 167405. 7783.61   4
  -3   0 -30 161465. 7102.63   4
   0  -3  30 171069. 7505.89   1
   0   3 -30 157279. 7704.24   4
   3  -3 -33 118254. 6815.39   4
   2  -4   0 757.580 308.109   2
   2   2   0 1507.43 344.026   3
  -2   4   0 808.696 251.355   4
  -2  -2   0 474.112 295.377   3
  -4   2   0 872.845 129.314   1
  -2   4   0 1230.38 286.603   2
   4  -2   0 1496.07 141.421   1
  -4   2  -3 7663.89 547.040   4
   2   2   3 7751.34 594.027   3
   2  -4   3 6756.55 585.842   2
  -2   4  -3 7979.01 709.257   4
   2  -4  -3 7641.62 682.643   2
  -2   4   3 8219.41 698.279   2
  -4   2  -3 7185.69 511.668   1
   4  -2   3 8485.31 598.654   4
  -2  -2   3 7454.59 753.392   3
   2  -4   3 7054.98 659.803   4
  -2  -2  -3 8092.03 667.696   3
   2   2  -3 6750.84 717.120   3
  -2   4  -3 9202.95 649.236   2
   4  -2   3 6526.53 489.155   1
   2   2  -6 16695.2 1187.07   3
   4  -2   6 16152.2 959.100   1
  -2   4   6 13010.4 987.765   2
   2  -4  -6 14795.8 911.780   2
  -2  -2   6 16722.2 1135.92   3
  -4   2   6 14986.7 820.143   2
  -4   2  -6 18699.0 1059.49   4
  -4   2   6 14167.0 681.962   1
  -2  -2  -6 14251.1 851.128   3
  -2   4  -6 14905.8 1247.76   4
   4  -2   6 14428.5 1045.72   4
  -2   4  -6 15372.4 824.859   2
   2  -4   6 15119.4 1045.93   1
   4  -2  -6 15387.1 694.226   1
   2  -4   6 14422.7 762.644   2
   4  -2  -9 2149.43 334.602   1
  -2   4   9 1683.64 214.650   3
  -2   4   9 1655.14 387.295   2
   2  -4   9 1851.67 580.922   1
  -2   4  -9 1813.84 768.732   4
   2  -4   9 2036.75 295.281   2
   2  -4  -9 2007.45 413.116   2
  -2  -2  -9 1560.73 311.172   3
   4  -2   9 1763.88 469.792   1
  -4   2  -9-118.735 495.201   4
  -4   2   9 1344.50 283.442   2
  -2  -2   9 2445.84 524.209   1
  -2  -2   9 2004.84 484.765   3
  -4   2   9 1388.52 302.188   3
  -4   2   9 1254.12 324.277   1
  -2  -2 -12 890.489 223.923   3
   2  -4 -12 502.725 313.867   2
  -4   2  12 476.216 324.031   3
  -2   4 -12-66.9334 822.973   4
  -2  -2  12 1384.32 440.211   3
  -4   2  12 293.928 214.200   2
   2  -4  12 104.817 603.988   1
  -2  -2  12 327.774 455.139   1
  -4   2  12 230.824 362.518   1
   4  -2  12 507.304 532.875   1
  -4   2 -12 1664.70 686.493   4
  -2  -2  15 30215.9 2000.39   1
   2  -4 -15 33772.5 1376.06   2
  -2  -2 -15 34882.2 2209.02   4
  -2   4 -15 25934.5 2384.84   4
  -4   2 -15 32825.5 1087.68   2
  -4   2  15 32566.8 1414.13   3
  -4   2 -15 32399.6 2488.34   4
   4  -2  15 33050.9 2092.47   1
  -4   2  15 33463.3 1876.19   1
  -4   2  15 30698.4 1355.57   2
  -2  -2 -15 34036.1 1569.08   2
   2  -4  15 31945.9 2157.65   1
   2  -4  18 3086.27 966.128   1
  -2  -2 -18 3865.39 474.654   2
  -4   2  18 3912.11 889.022   1
   4  -2  18 3024.05 858.679   1
  -2  -2  18 4272.02 993.070   1
  -2   4 -18 4354.12 1305.31   4
   2  -4 -18 3699.96 451.488   2
  -2  -2 -18 3885.06 953.852   4
  -4   2 -18 1932.91 917.116   4
   2   2 -21 2314.72 1264.06   4
   2  -4  21 466.136 837.551   1
  -4   2 -21-414.778 1034.53   4
  -2   4 -21-146.100 1033.54   4
  -2  -2 -21-684.903 777.335   4
  -4   2  21 2194.18 813.772   1
   4  -2  21 89.1258 880.271   1
  -2  -2  21 315.035 777.659   1
  -2  -2  24 4313.07 1294.78   1
  -2  -2 -24 3613.78 1000.24   4
  -4   2 -24 1385.60 1068.57   4
   4  -2  24 3421.82 1092.36   1
  -2   4 -24 3633.65 1427.27   4
   2   2 -24 3165.06 1537.20   4
   2  -4  24 4515.01 1275.17   1
  -4   2  24 3399.02 1008.05   1
   2   2 -27 4740.71 1664.92   4
  -2  -2  27 2476.45 1162.21   1
   2  -4  27 3027.61 1126.18   1
  -4   2  27 4865.74 1387.57   1
  -2   4 -27 807.791 1215.10   4
  -2  -2 -27 4658.18 1312.77   4
   4  -2  27 5382.07 1485.41   1
  -4   2 -27 1058.30 1011.25   4
  -4   2 -30 1864.41 1319.28   4
   2  -4  30 1307.82 1106.74   1
   2   2 -30 1011.23 1437.52   4
   4  -2  30 3563.56 1663.87   1
   4  -2 -30 1004.78 1506.49   4
   2  -4 -30 1482.24 1174.59   4
  -2   4 -30 63.3576 1213.29   4
  -2  -2  30 674.203 994.608   1
   3  -4  31 50582.0 4055.35   1
   3   1 -31 53153.4 4465.93   4
   4  -1 -31 52631.6 4390.36   4
  -3  -1  31 49859.1 3907.77   1
   4  -3  31 50922.5 4091.92   1
  -4   3 -31 46807.9 3902.44   4
  -4   1  31 46991.9 3689.92   1
   1  -4 -31 42689.8 3634.15   4
  -3   4 -31 52561.1 4230.98   4
  -3  -1  28 53606.3 3760.33   1
   1  -4 -28 56250.8 3862.18   4
   3  -4  28 52739.3 3906.12   1
  -4   3 -28 57598.2 4140.22   4
  -3   4 -28 63475.2 4447.57   4
   4  -1 -28 62045.4 4504.34   4
  -1  -3 -28 64334.3 3960.66   4
   4  -3  28 53039.6 3822.85   1
  -4   1  28 57962.2 3806.13   1
   3   1 -28 68998.1 4755.43   4
  -4   1  25 115420. 5169.61   1
   4  -3  25 127298. 5605.88   1
   3  -4  25 121583. 5609.42   1
  -1  -3 -25 111272. 5253.61   4
  -4   3 -25 126197. 6004.43   4
  -3  -1  25 120304. 5371.72   1
  -3   4 -25 125846. 6292.53   4
   3   1 -25 120751. 6075.63   4
  -4   3 -22 70878.7 4311.32   4
  -3  -1  22 68522.8 3702.34   1
   4  -3  22 76691.8 3973.05   1
   3  -4  22 74803.1 3973.36   1
  -1  -3 -22 75733.9 3848.62   4
  -3   4 -22 67076.3 4433.64   4
  -4   1  22 75050.8 3674.23   1
   1  -4 -19 64091.2 1981.13   2
  -1  -3 -19 58798.9 1938.25   2
  -4   3 -19 57139.0 3712.36   4
  -4   1  19 59593.3 3001.05   1
  -3  -1  19 58514.9 3112.72   1
   3  -4  19 61659.5 3394.24   1
  -3   4 -19 68403.9 4220.79   4
   4  -3  19 57374.7 3182.68   1
   4  -3  16 27309.4 1972.21   1
  -4   3 -16 27664.4 831.162   2
   1  -4 -16 28863.7 1298.15   2
  -4   3 -16 29022.6 2419.65   4
  -3  -1  16 25204.3 1808.31   1
  -4   1  16 28602.1 1478.83   3
  -4   1  16 29901.7 1876.25   1
  -3  -1  16 27902.5 910.275   2
  -1  -3 -16 29348.3 1401.82   2
  -4   1  16 28936.9 1194.12   2
  -3  -1  16 27587.8 1616.60   3
   3  -4  16 27465.6 2042.27   1
  -3   4 -16 23528.6 2330.88   4
  -3  -1  13 6457.79 811.178   3
  -1  -3 -13 7138.29 786.222   2
  -4   3 -13 6227.53 484.570   2
  -4   3 -13 7699.15 1237.45   4
   1  -4 -13 6600.38 629.389   2
  -3   4 -13 5012.56 1239.08   4
  -3  -1  13 5556.42 784.861   1
   4  -3  13 8002.70 1036.83   1
  -4   1  13 7426.36 864.008   1
  -4   1  13 7010.00 563.422   2
   3  -4  13 6430.85 994.810   1
  -4   1  13 6788.44 731.950   3
   4  -3  10 1229.12 517.423   1
  -1  -3 -10 644.366 206.849   3
  -3   4 -10 452.470 168.764   2
  -4   1  10 323.572 307.254   3
  -4   3 -10 196.283 672.717   4
  -4   1  10 579.726 230.555   2
   1  -4 -10 1191.42 428.482   2
   3  -4  10 704.212 517.325   1
  -4   1  10 549.242 312.508   1
  -3   4 -10 1079.21 712.436   4
  -4   3 -10 1330.43 250.243   2
  -3  -1  10 1647.99 433.636   1
  -3  -1  10 364.124 369.485   3
  -3   4  -7 22153.0 1579.88   4
  -1   4   7 24685.9 990.037   3
   3  -4   7 24902.2 1010.44   2
   3  -4   7 28112.3 1420.54   1
  -4   3  -7 25209.5 1021.29   2
  -4   1   7 24253.5 1055.66   1
  -3   4  -7 24041.6 1020.51   2
   4  -1  -7 24416.7 1052.69   1
  -4   1   7 22791.7 1154.37   3
   1  -4  -7 24660.5 1325.12   2
  -4   3  -7 23002.5 1432.75   4
   4  -3   7 26836.5 1334.63   1
  -3  -1   7 25999.0 1259.55   1
  -3  -1   7 21399.9 1313.49   3
  -1  -3  -7 24175.1 1128.14   3
  -4   3  -4 113921. 3101.16   4
  -3  -1   4 110568. 3274.14   3
   3  -4   4 122011. 3458.95   4
  -3   4  -4 111043. 3331.04   4
  -1   4   4 115260. 3053.49   3
  -4   1   4 112975. 2547.85   1
   3  -4   4 112332. 2889.36   2
   1   3   4 117386. 3063.50   3
   4  -3   4 100927. 3198.09   4
   3   1  -4 112009. 3307.30   3
   4  -3   4 111423. 2921.86   1
  -1  -3  -4 111174. 3185.44   3
  -4   3  -4 107293. 2825.61   2
   1  -4  -4 109456. 3345.19   2
  -4   3  -4 97996.2 2868.61   1
  -3   4  -4 110984. 2878.00   2
   3  -4   4 118888. 3190.07   1
  -3   4  -1 204430. 4751.04   4
  -3  -1   1 203998. 4914.27   3
   1  -4  -1 206198. 4501.92   4
  -1   4   1 203876. 4510.87   4
  -3   4  -1 197397. 4686.76   2
   3  -4   1 202653. 4715.24   2
   4  -3   1 196841. 4283.25   1
   4  -3   1 208115. 4704.21   4
  -1   4   1 198179. 4981.54   3
   3   1  -1 205234. 4927.51   3
   1   3   1 201349. 5061.76   3
  -1  -3  -1 203162. 4335.49   4
  -1  -3  -1 195219. 5067.39   3
  -4   3  -1 194206. 4605.83   2
   1  -4  -1 194747. 5081.83   2
   1   3   1 206247. 4254.68   4
   3  -4   1 204552. 4767.82   4
   4  -1   2 93770.8 2348.77   4
  -1   4  -2 94710.6 2781.13   4
   1   3  -2 91589.0 2851.90   4
   1  -4   2 90940.2 2787.70   2
   3  -4  -2 93978.9 2647.75   2
  -3   4   2 94768.3 2678.74   2
  -3  -1  -2 94102.8 2647.14   3
   1   3  -2 96448.8 3093.45   3
  -1  -3   2 88689.2 2992.09   3
  -4   3   2 88939.0 2518.66   2
  -4   1  -2 92887.7 2285.82   1
  -1   4  -2 88722.2 2923.75   3
   1  -4   2 92959.5 2755.29   4
  -1  -3   5 149888. 4347.09   3
   4  -1   5 156623. 3803.61   1
  -4   3   5 147773. 3731.76   2
   1   3  -5 148976. 4698.04   4
  -4   1  -5 154132. 3644.51   4
   3  -4  -5 144017. 3799.28   2
   1   3  -5 151607. 4458.81   3
   4  -1   5 147504. 3840.35   4
   1  -4   5 143089. 3828.06   2
  -3   4   5 147859. 3915.56   2
  -1   4  -5 149551. 4532.54   4
  -4   1  -5 148681. 3784.63   1
  -3  -1  -5 158176. 3367.77   4
   4  -3  -5 148822. 3298.42   1
  -1  -3   8 381638. 8961.16   3
  -1  -3   8 374672. 8752.35   1
   1  -4   8 370684. 7945.14   2
   3  -4  -8 382754. 8188.01   2
  -4   3   8 382041. 8012.38   1
   1  -4   8 383464. 8871.37   1
  -3  -1  -8 384426. 8575.33   4
   4  -1   8 393577. 8580.94   1
  -1   4  -8 367471. 9922.21   4
  -3   4   8 370936. 8422.70   2
   4  -3  -8 386074. 8038.57   1
   1   3  -8 357295. 9813.34   4
  -4   1  -8 379130. 8700.39   4
  -4   3   8 372751. 8138.08   2
  -3   4  11 350640. 8104.19   2
   3  -4 -11 365298. 7692.36   2
  -1   4 -11 341450. 9984.95   4
  -4   3  11 323883. 7404.63   3
  -1  -3  11 354376. 8594.01   1
  -4   3  11 346479. 7732.51   2
  -4   3  11 354789. 7966.66   1
   4  -1  11 361264. 8464.94   1
   1  -4  11 345711. 7147.45   2
  -1  -3  11 348960. 8493.00   3
   1  -4  11 358905. 8687.54   1
  -3  -1 -11 335579. 8676.38   4
  -4   1 -11 370529. 9036.24   4
   1   3 -11 356630. 10049.9   4
  -4   3  14 83375.2 3059.09   1
   3   1  14 85839.1 3407.05   1
   4  -1  14 86384.0 3378.47   1
  -4   3  14 81439.3 2327.29   3
  -4   1 -14 84688.9 3799.02   4
   1   3 -14 92305.2 4509.35   4
  -4   3  14 81199.1 2665.69   2
  -3  -1 -14 84752.3 3653.73   4
   3  -4 -14 89984.7 2543.93   2
   1  -4  14 83929.0 3514.03   1
  -1  -3  14 84647.1 3484.14   1
   1   3 -17 102532. 5146.82   4
  -4   3  17 99384.1 3759.62   1
  -3  -1 -17 104158. 4354.81   4
   1  -4  17 103407. 4316.65   1
  -1   4 -17 108897. 5235.97   4
  -4   1 -17 95141.6 4488.85   4
  -4   3  17 98453.6 3080.68   2
  -3  -1 -17 102403. 2575.51   3
  -1  -3  17 100844. 4196.64   1
  -3  -1 -17 101316. 3002.35   2
   4  -1  17 103731. 4081.53   1
   3   1  17 101280. 4073.84   1
  -1   4 -20 89790.9 4981.73   4
   1   3 -20 97054.4 5102.78   4
   1  -4  20 95726.0 4452.13   1
  -4   1 -20 83351.0 4457.55   4
   4  -1  20 87408.0 4074.13   1
  -4   3  20 100398. 4008.98   1
  -3  -1 -20 86163.9 4248.50   4
  -1  -3  20 94056.5 4388.34   1
  -4   3  23 67158.6 3546.74   1
  -1   4 -23 65749.7 4472.91   4
  -1  -3  23 69291.6 3915.62   1
  -4   1 -23 68744.4 4077.38   4
  -3  -1 -23 68621.8 3882.06   4
   1  -4  23 67105.1 3888.23   1
   4  -1  23 63357.6 3636.59   1
   1   3 -23 75389.5 4622.99   4
  -3  -1 -26 41271.5 3117.16   4
   1   3 -26 44354.6 3733.98   4
  -4   1 -26 44932.5 3359.88   4
  -1   4 -26 40883.9 3674.91   4
   4  -1  26 39647.2 3171.48   1
   1  -4  26 36185.4 3116.84   1
  -1  -3  26 45124.2 3352.65   1
  -1   4 -29 4967.51 1480.52   4
   1   3 -29 4825.36 1587.12   4
  -1  -3  29 6782.62 1622.18   1
   1  -4  29 6598.17 1623.68   1
  -3  -1 -29 4130.91 1347.54   4
  -4   1 -29 6601.18 1417.61   4
   1   3 -32 1478.26 1260.38   4
   4  -3 -32-818.557 1314.90   4
   3  -4 -32-235.665 1431.29   4
  -1  -3  32 2120.02 1392.01   1
  -1   4 -32 1052.59 1358.67   4
  -4   4 -32 54788.1 4311.68   4
  -4   0  32 55103.8 4140.34   1
  -4   4 -29 60080.5 4391.06   4
   4  -4  29 60299.8 4254.48   1
   0  -4 -29 59382.1 3984.81   4
   4   0 -29 61157.8 4645.63   4
  -4   0  29 59150.4 4010.10   1
   4  -4  26 30990.9 2928.56   1
  -4   4 -26 29862.4 3013.08   4
   4   0 -26 29439.4 3074.81   4
   0  -4 -26 25933.3 2500.60   4
  -4   0  26 32246.0 2680.95   1
   4  -4  23 7776.81 1500.77   1
  -4   4 -23 6211.06 1428.19   4
  -4   0  23 4869.77 1123.77   1
   4  -4  20 18596.1 1938.53   1
  -4   0  20 15613.4 1593.12   1
  -4   4 -20 18748.3 2157.10   4
  -4   0  17 41902.4 2389.91   1
   0  -4 -17 43090.9 1730.34   2
  -4   0  17 41974.3 2023.61   3
  -4   4 -17 38075.1 2984.04   4
   4  -4  17 41688.0 2582.18   1
  -4   4 -14 57323.9 3308.54   4
  -4   0  14 54297.2 2331.96   3
   4  -4  14 58109.6 2849.86   1
  -4   0  14 52786.7 1755.30   2
  -4   4 -14 51850.0 1530.87   2
  -4   0  14 57405.7 2526.27   1
   0  -4 -14 56309.0 2147.26   2
  -4   4 -11 53286.1 1656.91   2
   4  -4  11 58127.0 2548.90   1
  -4   0  11 51797.7 2224.75   3
   0  -4 -11 56213.6 2266.01   2
  -4   0  11 55072.1 2193.39   1
  -4   4 -11 56699.2 3010.54   4
   0   4   8 59392.9 1794.22   3
   4  -4   8 63513.8 2394.37   1
  -4   4  -8 64658.5 1904.17   2
   0  -4  -8 65603.3 1963.74   3
   0  -4  -8 62903.9 2514.82   2
  -4   4  -8 65711.7 2790.63   4
  -4   0   8 58717.6 2068.35   1
  -4   0   8 59809.4 2310.55   3
  -4   0   5 624162. 12954.5   3
   0  -4  -5 591512. 12865.7   3
   0   4   5 617987. 12731.0   3
  -4   4  -5 624047. 13160.3   4
   4  -4   5 635153. 12856.3   1
  -4   0   5 625312. 12478.3   1
  -4   4  -5 604393. 12505.9   2
   0  -4  -2 462489. 10313.2   3
  -4   4  -2 475079. 9805.97   2
   4  -4   2 478231. 10034.8   4
   0   4   2 491673. 10309.6   3
  -4   4  -2 478270. 9965.69   4
   0  -4  -2 461432. 9413.88   4
  -4   0   2 455237. 9976.56   3
   4  -4   2 466380. 9692.85   1
   4  -4   2 477749. 9841.45   2
   0   4  -1 252445. 5738.03   4
   0   4  -1 249164. 6290.22   3
   4  -4  -1 253947. 5738.81   2
   0  -4   1 255411. 5794.54   4
  -4   4   1 243159. 5703.48   2
   0  -4   1 250422. 6300.38   3
  -4   0  -4 28677.8 942.514   4
  -4   4   4 28007.4 1277.78   2
   0   4  -4 29268.7 1663.32   4
   4   0   4 29076.8 1068.83   4
   0  -4   4 29903.1 1649.26   3
   0  -4   4 27789.3 1634.10   4
  -4   0  -4 30476.2 1184.77   1
   4  -4  -4 30930.9 1305.19   2
  -4   4   7 53563.2 1953.73   2
   4  -4  -7 56150.5 1691.10   1
   4   0   7 54688.3 2111.06   4
  -4   0  -7 57470.2 1896.75   4
   0  -4   7 53195.5 2372.44   3
   4  -4  -7 52147.4 1874.10   2
   0  -4   7 57270.9 2327.71   1
   0   4  -7 54849.6 2818.55   4
   0  -4  10 88476.5 3284.90   1
  -4   0 -10 90529.4 3218.03   4
   0   4 -10 83911.3 4132.44   4
   4  -4 -10 92435.7 2696.01   2
   0  -4  10 90618.1 2571.79   2
   4   0  10 91864.1 3175.92   1
   0   4 -13 70781.1 3879.43   4
   0  -4  13 70773.2 1837.95   2
   4   0  13 67489.0 2892.09   1
  -4   4  13 66145.1 1868.27   3
  -4   0 -13 64528.7 3080.01   4
   0  -4  13 70663.4 3083.69   1
  -4   0 -16 39013.9 2557.81   4
   4   0  16 37698.0 2313.53   1
   0   4 -16 41544.0 3235.21   4
   0  -4  16 44353.8 2592.49   1
  -4   0 -19 17772.8 1805.81   4
   0  -4  19 15595.2 1776.07   1
   0   4 -19 15545.6 2167.15   4
   4   0  19 16531.2 1711.24   1
   0   4 -22 973.736 1064.29   4
   0  -4  22 491.066 941.819   1
  -4   0 -22 955.741 871.087   4
   4   0  22 2409.26 1026.56   1
   0  -4  25 452.645 978.487   1
  -4   0 -25 320.024 803.048   4
   0   4 -25 1458.77 1146.70   4
  -4   0 -28 3854.18 1265.23   4
   0  -4  28 3961.51 1472.42   1
   0   4 -28 4214.42 1624.20   4
   0   4 -31 3258.16 1433.42   4
   0  -4  31 5761.33 1668.47   1
   4  -4 -31 4044.92 1510.43   4
  -3  -2  32 67014.0 4699.34   1
  -3   5 -32 69395.3 5058.20   4
  -5   3 -32 63334.9 4481.53   4
  -3  -2  29 108803. 5696.93   1
  -5   3 -29 105005. 5705.46   4
   5  -3  29 108120. 5731.83   1
   3   2 -29 125974. 6757.33   4
  -3   5 -29 111149. 6292.44   4
   2  -5 -29 113096. 5854.73   4
   3  -5  29 113992. 6026.92   1
   3  -5  26 101638. 5281.84   1
  -5   3 -26 98705.7 5344.75   4
  -3   5 -26 108395. 5919.47   4
  -5   2  26 107407. 4963.13   1
  -2  -3 -26 98620.6 4803.51   4
  -3  -2  26 92487.5 4910.95   1
   5  -3  26 105374. 5183.14   1
   3   2 -26 105401. 5876.80   4
  -5   2  23 20295.0 1952.85   1
  -5   3 -23 19296.2 2276.91   4
   3  -5  23 20239.8 2173.31   1
  -3  -2  23 21527.3 2147.59   1
  -3   5 -23 14400.7 2209.32   4
   3   2 -23 21654.5 2528.40   4
   5  -3  23 20062.8 2100.13   1
  -2  -3 -23 21425.6 2066.19   4
   3  -5  20 110300. 4861.48   1
  -5   3 -20 105419. 5122.08   4
  -5   2  20 105194. 4222.08   1
  -3  -2  20 108807. 4640.99   1
  -2  -3 -20 107510. 4493.79   4
   5  -3  20 109501. 4637.19   1
  -3   5 -20 100282. 5405.33   4
  -5   3 -17 45983.7 3070.73   4
   3  -5  17 45428.6 2810.78   1
  -3   5 -17 44046.0 3357.34   4
  -5   2  17 45695.5 2382.06   1
   2  -5 -17 47582.1 1832.23   2
  -3  -2  17 45192.1 2614.30   1
  -2  -3 -17 48320.4 2676.47   4
  -2  -3 -17 46275.5 1997.38   2
  -3  -2  17 46635.4 2359.49   3
  -5   2  17 46140.8 1962.76   3
   5  -3  17 43135.2 2600.17   1
   3  -5  14 98772.1 3860.31   1
   5  -3  14 93413.9 3665.88   1
  -3  -2  14 95186.7 3638.23   1
  -5   2  14 90708.7 2776.68   2
  -5   3 -14 94427.2 4178.51   4
  -5   3 -14 92764.4 2505.76   2
  -3   5 -14 89260.2 4543.29   4
  -5   2  14 89557.6 3016.18   3
  -3  -2  14 91785.9 3489.16   3
  -5   2  14 90043.9 3211.82   1
  -2  -3 -14 94627.3 2466.67   3
   2  -5 -14 94554.9 2936.80   2
   3  -5  11 89806.2 3357.30   1
   2  -5 -11 88967.5 2844.91   2
  -2   5  11 83108.8 2019.07   3
  -5   3 -11 86015.6 3522.51   4
  -2  -3 -11 87554.5 2555.52   3
  -3  -2  11 83062.9 3188.78   3
  -3  -2  11 88584.6 3153.12   1
  -5   2  11 80370.1 2578.67   2
  -3   5 -11 83615.4 2446.99   2
   5  -3  11 82603.5 3122.41   1
  -3   5 -11 87261.0 4140.91   4
  -5   2  11 85379.0 2767.14   3
  -5   2  11 82326.8 2717.71   1
  -2   5   8 68845.6 2120.92   3
   3  -5   8 69912.8 2127.42   2
  -3  -2   8 66179.3 2722.60   3
  -3  -2   8 69082.0 2571.73   1
  -5   3  -8 74436.8 2758.38   4
  -5   2   8 71830.6 2116.74   1
  -3   5  -8 70708.8 2209.46   2
   3  -5   8 76541.9 2805.59   1
   2  -5  -8 76367.9 2595.32   2
  -3   5  -8 74454.2 3254.61   4
  -5   2   8 71685.1 2316.56   3
   5  -2  -8 71126.2 2107.07   1
   5  -3   8 71629.1 2590.67   1
  -2  -3  -8 68230.2 2333.36   3
   3  -5   5 130131. 3797.68   1
  -3  -2   5 130683. 3999.79   3
  -5   2   5 124614. 2883.83   1
   5  -3   5 129742. 3755.35   4
  -3   5  -5 132046. 3492.87   2
   2   3   5 132763. 3490.39   3
   5  -3   5 145980. 3604.60   1
  -2  -3  -5 132188. 3751.07   3
  -2   5   5 130595. 3538.60   3
   2  -5  -5 133224. 3832.13   2
  -5   3  -5 135131. 3593.52   4
   3  -5   5 135671. 3495.50   2
  -3   5  -5 136188. 4100.87   4
  -3   5  -2 6108.21 592.941   2
  -5   3  -2 6193.40 439.881   1
  -3  -2   2 5323.67 686.900   3
  -2  -3  -2 6526.51 724.753   3
   2   3   2 8018.52 731.342   3
   5  -3   2 5259.50 532.175   4
   5  -3   2 5590.18 436.323   1
   2  -5  -2 5587.52 492.770   4
   3  -5   2 5476.25 579.009   2
  -3   5  -2 5304.20 582.057   4
   2  -5  -2 4890.38 660.014   2
   2  -5   1 8630.10 683.010   4
  -3   5   1 8326.61 725.188   2
  -2   5  -1 7684.62 736.650   2
   2  -5   1 8077.36 751.524   2
  -5   2  -1 7790.39 458.647   1
   3  -5  -1 8823.04 727.344   2
   3  -5  -1 7663.01 625.553   4
  -2  -3   1 8770.02 872.091   3
   2   3  -1 8160.10 693.184   4
   3   2   1 7612.15 708.401   3
   2   3  -1 8640.73 838.515   3
  -3  -2  -1 8846.64 809.470   3
  -2   5  -1 8238.00 695.413   4
  -5   2  -4 33713.1 1300.00   4
   3  -5  -4 33913.7 1529.34   2
  -2   5  -4 34653.5 1735.28   4
   5  -2   4 35949.6 1346.05   1
  -3  -2  -4 33895.3 1533.39   3
  -5   2  -4 34349.8 1361.47   1
  -2   5  -4 33105.3 1525.94   2
  -2  -3   4 31295.0 1746.28   3
   2  -5   4 34979.0 1529.68   2
   5  -2   4 33102.5 1395.24   4
   5  -2   7 113101. 3552.57   4
   5  -2   7 106554. 3219.77   1
  -3  -2  -7 109838. 2902.33   4
   5  -3  -7 109281. 2699.72   1
  -2   5  -7 108891. 4092.12   4
   3  -5  -7 110289. 3233.76   2
  -5   2  -7 110105. 3212.48   4
   2  -5   7 107977. 3548.82   1
  -3  -2  -7 103599. 3049.61   3
   2  -5   7 106092. 2985.48   2
  -5   3   7 109079. 2669.89   1
  -2  -3   7 109205. 3687.44   3
  -5   3  10 23464.0 1132.73   3
  -5   2 -10 23239.9 1555.71   4
  -2   5 -10 23483.3 2025.96   4
   5  -2  10 20017.1 1381.27   1
  -3  -2 -10 22035.1 1114.18   3
  -2  -3  10 23496.1 1509.18   1
   2  -5  10 22087.7 1568.44   1
   2  -5  10 21961.5 1013.17   2
  -3  -2 -10 22135.0 1377.89   4
   3  -5 -10 24257.0 1262.48   2
  -5   3  10 20307.9 1116.14   1
  -2  -3  10 19642.4 1460.26   3
  -5   2 -13 341044. 9166.12   4
  -3  -2 -13 349965. 8789.48   4
   5  -2  13 355160. 8700.34   1
   3  -5 -13 353120. 7774.81   2
  -2  -3  13 343253. 8737.77   1
   2  -5  13 338410. 7060.13   2
   2  -5  13 349128. 8964.90   1
  -5   3  13 333399. 8016.14   1
  -3  -2 -13 343628. 7500.02   3
  -2  -3  13 344183. 8648.89   3
  -5   3  13 331639. 7674.69   3
  -2   5 -13 319633. 10093.5   4
   2  -5  16 193011. 6263.32   1
  -5   3  16 180013. 4690.72   3
  -2   5 -16 186624. 7326.60   4
   5  -2  16 192094. 6020.98   1
   2   3 -16 214016. 7426.04   4
  -3  -2 -16 193948. 4432.38   3
  -2  -3  16 192321. 6119.55   1
  -3  -2 -16 199596. 6188.49   4
  -5   3  16 186440. 5497.40   1
  -5   2 -16 185464. 6543.86   4
  -2  -3  16 184760. 4055.77   2
   3  -5 -16 193549. 4779.19   2
   2   3 -19 132170. 6048.12   4
  -5   2 -19 111666. 5224.46   4
  -5   3  19 121887. 4513.10   1
   5  -2  19 124841. 4927.76   1
  -3  -2 -19 131879. 3663.36   2
  -2   5 -19 129754. 6091.56   4
   2  -5  19 132053. 5295.75   1
   3  -5 -19 127914. 3461.26   2
  -3  -2 -19 129391. 5027.31   4
  -2  -3  19 131421. 5119.37   1
  -5   3  22 58346.0 3217.17   1
   2  -5  22 64439.2 3833.87   1
   2   3 -22 61929.5 4185.17   4
  -2   5 -22 60000.9 4342.52   4
  -5   2 -22 63836.2 3890.12   4
  -2  -3  22 59719.2 3574.51   1
   5  -2  22 57894.2 3424.23   1
  -3  -2 -22 59825.4 3413.17   4
   5  -2  25 55116.6 3607.14   1
  -2  -3  25 48631.1 3456.48   1
  -2   5 -25 56000.6 4231.40   4
  -3  -2 -25 52302.3 3340.68   4
   2   3 -25 49075.9 3887.09   4
   2  -5  25 56100.4 3788.44   1
  -5   2 -25 57898.0 3785.45   4
   2   3 -28 15726.7 2516.67   4
  -5   2 -28 16294.0 2197.85   4
   5  -2  28 15557.3 2232.65   1
   2  -5  28 17337.6 2430.45   1
  -2   5 -28 13424.5 2241.38   4
  -2  -3  28 11895.0 1922.26   1
  -2  -3  31 41223.4 3709.39   1
   5  -3 -31 43831.7 4145.83   4
   3  -5 -31 41764.9 3761.49   4
   2   3 -31 37783.3 3895.38   4
  -2   5 -31 34181.9 3513.70   4
   2  -5  31 44173.8 3909.63   1
  -5   4 -33 1013.39 1347.97   4
  -4  -1  33 419.155 1188.47   1
   5  -1 -30-47.4019 1362.30   4
  -5   4 -30 1962.36 1179.36   4
   4   1 -30 296.799 1581.80   4
   4  -5  30-556.916 1138.60   1
  -4   5 -30-80.4303 1299.33   4
  -5   1  30 2774.69 1348.56   1
  -4  -1  30 1714.55 1267.97   1
   5  -4  30 2770.33 1518.09   1
  -4  -1  27 1990.06 1160.16   1
  -5   4 -27-1221.71 1314.09   4
  -1  -4 -27 48.2549 752.529   4
   4  -5  27 2103.76 1288.74   1
   1  -5 -27-463.778 888.190   4
   5  -4  27 671.066 1126.14   1
  -4   5 -27 1216.35 1366.70   4
  -5   1  27 2377.67 1071.99   1
   4   1 -27-108.091 1230.32   4
  -4   5 -24 256.945 1253.96   4
  -5   4 -24 1470.07 1182.00   4
   4  -5  24 3321.19 1299.14   1
  -5   1  24 3156.05 988.339   1
   5  -4  24 1083.93 871.612   1
  -4  -1  24 2891.13 1082.16   1
  -1  -4 -24 3201.10 1030.98   4
  -4   5 -21 874.975 986.938   4
   4  -5  21 340.226 962.848   1
   5  -4  21 1473.84 1006.99   1
  -5   4 -21 1126.94 997.604   4
  -4  -1  21-541.112 821.007   1
  -5   1  21 49.5674 657.556   1
   5  -4  18 5752.37 1111.57   1
   4  -5  18 6982.62 1231.93   1
   1  -5 -18 6412.43 687.763   2
  -4  -1  18 6552.96 892.685   3
  -4  -1  18 6931.36 1132.62   1
  -5   4 -18 3866.32 976.227   4
  -4   5 -18 5207.85 1317.06   4
  -1  -4 -18 7739.57 790.380   2
  -5   1  18 7619.55 1075.58   1
  -5   1  18 8022.36 909.886   3
  -4   5 -15 6652.31 1346.39   4
  -5   1  15 5506.30 752.216   3
  -1  -4 -15 5191.61 702.341   2
  -4  -1  15 5016.71 494.522   2
  -5   1  15 5982.00 599.130   2
   5  -4  15 4789.50 953.533   1
  -4  -1  15 4364.22 817.731   1
  -5   4 -15 2789.35 923.669   4
   1  -5 -15 5415.97 639.768   2
  -5   1  15 3648.38 728.229   1
  -4  -1  15 6651.06 863.571   3
   4  -5  15 6280.87 1113.96   1
  -5   4 -15 5090.90 439.200   2
  -5   1  12 10833.4 981.701   3
   5  -4  12 11097.2 1216.97   1
   4  -5  12 12243.8 1246.24   1
  -5   1  12 11692.2 807.004   2
  -4  -1  12 11458.0 1060.03   1
  -1  -4 -12 11733.5 1084.77   2
  -5   4 -12 11034.2 1352.00   4
  -5   1  12 12974.4 1007.61   1
  -4  -1  12 11135.6 1094.01   3
  -1  -4 -12 11919.7 684.948   3
  -4   5 -12 11197.2 695.622   2
  -4   5 -12 11765.9 1459.58   4
  -5   4 -12 10933.9 709.924   2
   1  -5 -12 13708.8 1071.10   2
  -5   4  -9 1010.21 295.373   2
  -1   5   9 1012.84 230.121   3
  -5   1   9 904.333 396.324   3
   1  -5  -9 1467.11 516.038   2
  -5   1   9 1310.26 376.299   1
  -5   4  -9 1736.89 572.164   4
   4  -5   9 284.878 490.488   1
  -1  -4  -9 1334.65 358.981   3
  -4  -1   9 1473.87 431.673   1
  -4   5  -9 996.377 237.091   2
  -4   5  -9 2022.86 747.874   4
   5  -4   9 456.960 397.297   1
  -4  -1   9 1053.82 463.978   3
  -4   5  -6 65278.7 2674.42   4
  -5   4  -6 63362.0 2047.92   2
   4  -5   6 65652.0 2383.44   1
  -1  -4  -6 63568.2 2335.08   3
   1   4   6 65954.1 2180.36   3
  -5   4  -6 59588.5 2412.09   4
  -1   5   6 66171.8 2203.23   3
  -4   5  -6 64015.3 2061.31   2
   4  -5   6 65760.4 2082.42   2
   5  -4   6 67029.9 2285.09   1
  -4  -1   6 64370.7 2499.27   3
   1  -5  -6 65196.8 2597.54   2
  -5   1   6 64985.7 1864.18   1
  -5   1   6 64582.4 2255.74   3
   1  -5  -3 144811. 3429.76   4
  -1  -4  -3 134846. 4091.86   3
   1   4   3 148679. 4080.74   3
  -1   5   3 142838. 4011.63   3
   4  -5   3 150067. 3760.71   2
  -4  -1   3 141323. 4032.22   3
   1  -5  -3 140499. 4269.55   2
  -5   4  -3 141251. 3793.25   4
   5  -4   3 143464. 3508.78   1
  -4   5  -3 136211. 3682.03   2
  -1  -4  -3 141926. 3111.11   4
  -5   4  -3 146211. 3609.27   1
  -4   5  -3 134871. 3907.32   4
   1  -5   0 3057.76 395.483   4
   5  -4   0 2300.26 263.677   1
   4  -5   0 2540.92 453.721   2
  -4  -1   0 2531.64 464.545   3
  -1   5   0 2530.48 394.782   4
  -1   5   0 3650.79 579.418   3
   1   4   0 3287.99 588.596   3
   1  -5   0 2303.20 517.350   2
  -1  -4   0 3497.39 421.414   4
  -1  -4   0 2091.76 468.129   3
   1   4   0 2719.77 384.166   4
  -1   5  -3 104.922 345.259   4
   1  -5   3 674.388 379.099   2
   1   4  -3 67.2429 354.210   4
   4  -5  -3 1201.28 352.940   2
   5  -1   3 164.254 156.921   4
   4   1   3 638.912 126.769   4
  -5   1  -3 1231.02 255.608   1
  -1  -4   3 606.963 412.982   3
  -5   1  -6 6752.78 557.574   4
   5  -1   6 8746.59 745.628   1
   1   4  -6 6741.47 1002.02   4
  -1   5  -6 6339.97 993.422   4
   4  -5  -6 8065.11 717.896   2
   1  -5   6 8177.46 749.005   2
  -4  -1  -6 7624.49 448.754   4
   5  -1   6 8586.88 758.130   4
  -1  -4   6 6259.12 885.569   3
   5  -4  -6 7909.13 486.494   1
  -4  -1  -9 4302.15 540.471   4
   5  -4  -9 4324.68 482.155   1
  -5   1  -9 4857.59 624.161   4
   5  -1   9 5502.91 718.722   1
   1   4  -9 3151.97 902.585   4
  -1  -4   9 4070.21 675.404   1
   4  -5  -9 5364.76 636.441   2
  -1   5  -9 3875.82 1032.58   4
  -1  -4   9 5263.35 844.476   3
   1  -5   9 5215.41 814.773   1
   1  -5   9 4212.70 517.840   2
   1  -5  12 9208.86 623.547   2
  -1  -4  12 8209.76 714.314   2
   1   4 -12 9523.24 1510.73   4
  -1  -4  12 7351.05 987.496   1
  -1  -4  12 7827.57 1003.76   3
  -5   1 -12 8705.70 1034.62   4
  -1   5 -12 7096.02 1456.20   4
   1  -5  12 8862.37 1102.31   1
  -5   4  12 8843.25 648.213   3
   4  -5 -12 8588.14 759.751   2
   5  -1  12 8990.14 1060.62   1
  -4  -1 -12 8103.80 970.961   4
   5  -1  15 2430.56 800.313   1
   1  -5  15 2430.25 857.053   1
   4  -5 -15 2624.56 462.237   2
  -5   1 -15 2541.58 786.805   4
  -4  -1 -15 2814.86 721.671   4
  -1  -4  15 2897.05 837.995   1
  -1   5 -15 1857.70 1083.71   4
  -5   4  15 3332.36 427.727   3
  -1  -4  15 2650.79 321.395   2
   1   4 -15 3500.24 1275.32   4
   1  -5  15 3222.87 272.693   2
   1  -5  18 1223.98 831.056   1
  -1  -4  18 3227.38 897.822   1
  -4  -1 -18 1692.90 337.926   3
   5  -1  18 1261.74 775.045   1
  -4  -1 -18 1729.97 717.020   4
   1   4 -18 1519.68 1183.22   4
  -1   5 -18 936.315 1133.07   4
  -5   1 -18 187.884 688.535   4
  -1  -4  21 6610.28 1415.46   1
  -4  -1 -21 6230.21 1183.28   4
  -5   1 -21 3542.13 1061.44   4
   5  -1  21 4208.89 1185.65   1
   1  -5  21 5516.96 1270.41   1
   1   4 -21 7473.93 1805.92   4
  -1   5 -21 5537.00 1540.19   4
   1  -5  24-655.695 1149.69   1
  -1   5 -24-159.089 1217.53   4
  -4  -1 -24-382.969 717.624   4
   5  -1  24 1971.83 1101.90   1
  -1  -4  24 337.849 1006.31   1
   1   4 -24 396.902 1218.62   4
  -5   1 -24 833.874 780.384   4
  -1  -4  27 2101.86 1209.48   1
  -1   5 -27-2217.30 1355.48   4
  -4  -1 -27 1873.49 994.219   4
   1  -5  27 82.6222 1153.75   1
   1   4 -27 617.086 1264.60   4
  -5   1 -27-188.333 884.170   4
   1  -5  30 2580.20 1525.40   1
  -1  -4  30 3601.87 1640.48   1
  -1   5 -30-869.433 1513.39   4
   1   4 -30-610.661 1458.62   4
   4  -5 -33 1328.53 1450.87   4
   5  -5  31 4017.30 1444.95   1
   5   0 -31 2708.44 1546.45   4
  -5   0  31 3418.47 1431.70   1
  -5   5 -31 1330.93 1210.00   4
   5  -5  28 2341.30 1412.28   1
  -5   0  28-918.112 997.974   1
   5   0 -28-524.869 1270.99   4
  -5   5 -28 2616.71 1272.11   4
   5  -5  25 8507.97 1630.99   1
  -5   5 -25 8867.11 1752.83   4
   0  -5 -25 10088.7 1573.90   4
  -5   0  25 10249.0 1602.55   1
   5  -5  22 140.889 975.727   1
  -5   5 -22-479.384 1220.90   4
  -5   0  22 561.086 868.276   1
  -5   0  19 3634.88 916.625   1
  -5   0  19 3859.09 766.844   3
  -5   5 -19 1754.30 936.017   4
   0  -5 -19 4194.47 606.869   2
   5  -5  19 3583.97 1058.99   1
  -5   0  16 22661.5 1699.40   1
  -5   0  16 21976.8 1550.82   3
  -5   5 -16 18781.1 865.085   2
  -5   5 -16 17049.3 1943.56   4
   0  -5 -16 17986.3 1272.78   2
   5  -5  16 18715.4 1721.98   1
  -5   0  16 17804.6 1024.50   2
  -5   0  13 131477. 4315.89   3
  -5   5 -13 135678. 3441.66   2
   5  -5  13 137431. 4687.26   1
  -5   0  13 136513. 4239.70   1
  -5   5 -13 140328. 5470.66   4
   0  -5 -13 137950. 4254.34   2
   5  -5  10 229193. 6210.42   1
  -5   5 -10 234816. 6828.43   4
   0  -5 -10 240420. 6354.41   2
  -5   0  10 228876. 6117.48   3
  -5   0  10 231500. 5706.68   1
   0   5  10 219197. 5079.29   3
  -5   0   7 38840.4 1553.97   1
  -5   5  -7 40092.0 2031.06   4
   0  -5  -7 35620.3 2039.43   2
   0   5   7 39241.6 1626.93   3
   5  -5   7 37684.6 1788.12   1
   0  -5  -7 41283.2 1761.41   3
  -5   0   7 40809.4 1911.28   3
   0  -5  -4 196028. 4316.93   4
  -5   0   4 193277. 5058.96   3
   0   5   4 197587. 5134.83   3
   0  -5  -4 192436. 5259.22   3
   5  -5   4 198235. 4794.12   2
   5  -5   4 195923. 4827.38   1
  -5   5  -4 182885. 5057.07   4
   0  -5  -1 197908. 4569.19   4
   0   5   1 196055. 4551.96   4
   5  -5   1 203182. 4919.88   2
   0  -5  -1 187342. 5409.69   3
   0  -5   2 350471. 8589.72   3
   0   5  -2 343232. 7978.73   4
   0  -5   2 350346. 8098.64   4
   5  -5  -2 345666. 7820.06   2
   5  -5  -5 79590.1 2620.41   2
   0   5  -5 86303.5 3316.68   4
  -5   0  -5 82794.0 2082.27   4
   5   0   5 79921.3 2330.13   4
   0  -5   5 75087.2 3136.84   3
  -5   0  -8 367169. 7986.07   4
   0   5  -8 374880. 9993.88   4
   5   0   8 376734. 8544.23   4
   0  -5   8 371174. 9026.70   1
   0  -5   8 373632. 8515.99   2
   5  -5  -8 362779. 8237.85   2
   0  -5   8 383070. 9290.67   3
   5  -5  -8 354871. 7757.15   1
  -5   0 -11 9986.92 945.009   4
   0   5 -11 12481.5 1680.66   4
   0  -5  11 11301.0 1207.53   1
   0  -5  11 11077.6 829.602   2
   5  -5 -11 11725.3 907.212   2
   0   5 -14 37899.5 3085.66   4
   0  -5  14 34690.7 2257.91   1
   0  -5  14 34397.6 1311.83   2
  -5   0 -14 34372.3 2130.23   4
  -5   5  14 35049.8 1297.34   3
   5   0  14 35307.0 2126.49   1
   0  -5  17 4973.91 1098.35   1
   5   0  17 5094.33 1095.39   1
  -5   0 -17 3574.44 838.667   4
   0   5 -17 4050.48 1432.65   4
   0  -5  20 10057.6 1596.43   1
  -5   0 -20 7753.26 1261.34   4
   0   5 -20 7788.55 1786.99   4
   0  -5  23 173.891 1018.92   1
   0   5 -23 275.824 1192.74   4
  -5   0 -23 652.476 777.677   4
   0   5 -26 31836.8 3359.10   4
  -5   0 -26 36254.9 2859.24   4
   0  -5  26 31890.5 2963.61   1
   0   5 -29 50070.1 4267.58   4
   0  -5  29 51548.3 4071.97   1
   5  -5 -32 36802.0 3866.91   4
   6  -3   0 804621. 15420.9   1
  -6   3   0 804376. 15494.9   1
   3  -6   0 805718. 16728.8   2
  -3  -3   0 754919. 16974.1   3
   3   3   0 833753. 16200.1   4
  -3   6   0 788367. 16402.6   4
  -3  -3   3 557453. 12164.0   3
   3  -6  -3 521759. 11690.3   2
   6  -3   3 530049. 10867.1   1
   3  -6   3 535314. 11534.4   2
  -3  -3  -3 517786. 11784.3   3
  -6   3  -3 534952. 10942.4   1
  -3   6  -3 529949. 11689.8   4
   6  -3   3 542261. 11303.7   4
   6  -3   6 637635. 12794.0   1
  -3  -3  -6 601561. 13098.3   3
   3  -6   6 614556. 12795.6   2
  -3  -3   6 633047. 13721.3   3
   6  -3  -6 593098. 11896.9   1
   3  -6   6 620064. 13398.6   1
  -3   6  -6 587871. 13805.1   4
  -6   3  -6 614161. 12792.0   4
   3  -6  -6 615859. 13167.9   2
  -6   3   6 602022. 11833.0   1
   6  -3  -9 327463. 7005.74   1
   3  -6   9 325958. 7219.81   2
  -6   3   9 318581. 6943.43   1
  -3   6  -9 297861. 8900.92   4
  -6   3  -9 328035. 7900.73   4
   6  -3   9 324624. 7779.13   1
  -3   6   9 317533. 7161.27   3
  -3  -3  -9 316201. 7522.14   3
  -3  -3  -9 309635. 7283.11   4
   3  -6   9 315480. 8143.54   1
  -3  -3   9 332506. 8051.28   1
  -3  -3   9 315542. 8254.94   3
   3  -6  -9 331222. 7722.78   2
  -6   3  12 137458. 3987.67   3
  -3  -3 -12 145141. 3975.34   3
   3  -6 -12 146290. 4154.21   2
  -3   6 -12 141201. 5707.54   4
   3  -6  12 142869. 4872.27   1
   6  -3  12 143069. 4575.08   1
  -3  -3  12 140144. 4760.88   3
  -6   3 -12 155419. 5000.95   4
   3  -6  12 139886. 3592.76   2
  -3  -3  12 136303. 4577.77   1
  -3   6  12 144154. 3368.33   3
  -3  -3 -12 145640. 4388.36   4
  -6   3  12 137373. 3920.57   1
  -6   3 -15 86664.2 3982.92   4
  -3  -3 -15 88811.6 2641.04   3
  -6   3  15 90537.7 3206.22   1
  -3  -3  15 92240.0 3730.10   1
   3  -6 -15 85873.6 2895.19   2
  -3  -3 -15 88981.9 3560.28   4
   3  -6  15 84484.3 3828.13   1
   6  -3  15 84674.3 3544.88   1
  -3   6 -15 83556.8 4620.36   4
  -3  -3  15 88689.5 3609.64   3
  -6   3  15 82577.1 2971.06   3
  -3  -3 -18 109797. 3656.72   2
  -6   3  18 113258. 3450.33   3
  -3  -3 -18 117759. 4442.67   4
   6  -3  18 105536. 4383.02   1
   3   3 -18 117716. 5485.39   4
  -6   3  18 105981. 3975.41   1
  -6   3 -18 105712. 4849.80   4
  -3   6 -18 102069. 5432.70   4
  -3  -3  18 107865. 4505.40   1
   3  -6  18 108878. 4735.36   1
   3  -6 -18 103870. 3286.83   2
  -3  -3 -21 4185.21 1014.11   4
   3   3 -21 2244.62 1204.95   4
   3  -6  21 3436.49 1254.59   1
  -6   3  21 4654.01 1038.80   1
   6  -3  21 3906.25 1146.36   1
  -3   6 -21 3283.66 1431.92   4
  -6   3 -21 2096.99 909.389   4
  -3  -3  21 3451.58 1005.20   1
  -3   6 -24 18553.0 2442.86   4
   3  -6  24 20792.8 2366.12   1
  -3  -3  24 17825.5 2094.89   1
  -6   3  24 19554.7 2025.60   1
  -3  -3 -24 21263.1 2017.06   4
  -6   3 -24 18281.5 2197.21   4
   6  -3  24 18904.9 2199.96   1
   3   3 -24 18327.0 2596.63   4
  -3  -3  27 54830.0 3821.74   1
  -6   3 -27 52363.5 3795.23   4
  -3   6 -27 59493.1 4467.61   4
   6  -3  27 55460.5 3855.27   1
   3  -6  27 49815.9 3840.34   1
   3   3 -27 59290.7 4511.61   4
  -3   6 -30 86850.2 5698.52   4
   3  -6  30 81957.0 5255.11   1
   3   3 -30 95646.1 6023.42   4
  -6   3 -30 78146.0 4806.53   4
  -3  -3  30 85183.6 5181.47   1
   6  -3  30 87686.7 5265.10   1
  -4   6 -31 24572.1 3092.78   4
   6  -2 -31 20764.7 2971.25   4
   4  -6  31 23480.7 2988.32   1
   4   2 -31 23810.2 3167.16   4
  -6   4 -31 24561.2 2848.58   4
  -4  -2  31 23609.9 2768.95   1
  -6   2  28 24316.7 2432.64   1
  -4   6 -28 24294.2 3003.34   4
   6  -4  28 24789.7 2685.12   1
  -4  -2  28 22545.1 2514.49   1
   4  -6  28 21257.9 2596.44   1
   4   2 -28 21337.3 2842.88   4
  -6   4 -28 19398.7 2451.76   4
   6  -4  25 23157.6 2409.20   1
   4  -6  25 20283.3 2350.62   1
  -6   2  25 26587.9 2298.53   1
  -6   4 -25 22167.4 2540.54   4
  -2  -4 -25 20661.1 2038.14   4
  -4   6 -25 25357.9 2900.25   4
   4   2 -25 21526.5 2684.93   4
  -4  -2  25 19683.4 2208.13   1
   4  -6  22 49235.2 3427.31   1
  -2  -4 -22 54873.2 3170.73   4
  -6   2  22 55382.8 3089.63   1
  -4  -2  22 57641.9 3392.75   1
   6  -4  22 53616.7 3342.53   1
  -4   6 -22 51499.2 3928.62   4
  -6   4 -22 46246.9 3442.72   4
  -2  -4 -19 124695. 4651.00   4
   6  -4  19 116246. 4812.52   1
  -6   4 -19 106026. 5241.21   4
  -2  -4 -19 119188. 3757.95   2
  -4  -2  19 121724. 4364.06   3
  -4   6 -19 102866. 5549.60   4
   2  -6 -19 119597. 3547.66   2
  -6   2  19 116800. 4362.10   1
  -6   2  19 120514. 3860.33   3
   4  -6  19 119698. 5125.91   1
  -4  -2  19 115101. 4743.85   1
  -4  -2  16 193508. 5925.58   3
   6  -4  16 190525. 6134.38   1
   4  -6  16 185388. 6321.52   1
  -6   2  16 187164. 5382.36   3
  -2  -4 -16 186181. 5495.83   2
  -4   6 -16 191335. 7543.00   4
   2  -6 -16 197532. 5182.22   2
  -6   2  16 194267. 5577.15   1
  -6   4 -16 191630. 6806.58   4
  -4  -2  16 200319. 6121.12   1
   6  -4  13 166572. 5213.62   1
  -6   2  13 163706. 4757.08   3
  -4   6 -13 171097. 6461.11   4
  -6   4 -13 165109. 5721.13   4
   2  -6 -13 171571. 4721.29   2
  -4  -2  13 160626. 5163.78   3
  -4   6 -13 153899. 4129.03   2
  -6   2  13 171723. 4651.72   1
  -4  -2  13 167552. 5100.40   1
   4  -6  13 159763. 5367.96   1
  -2  -4 -13 166803. 4222.99   3
  -4   6 -10 183801. 6141.26   4
  -2  -4 -10 179734. 4739.32   3
   6  -4  10 179957. 5140.46   1
   4  -6  10 178099. 5369.81   1
  -4  -2  10 178544. 5079.74   1
  -2   6  10 177444. 4337.35   3
   2  -6 -10 174818. 5025.92   2
  -6   2  10 173489. 4775.11   3
  -4  -2  10 174799. 5357.14   3
  -6   4 -10 182034. 5449.19   4
   4  -6  10 176456. 4395.46   2
  -6   2  10 183039. 4510.71   1
   2   4   7 81193.8 2590.15   3
  -2  -4  -7 81053.0 2889.83   3
  -6   2   7 83068.8 2206.58   1
  -6   4  -7 82895.7 2914.21   4
   6  -4   7 81522.9 2771.62   1
   2  -6  -7 82311.2 3031.70   2
  -2   6   7 87741.2 2750.29   3
   4  -6   7 81723.0 3036.31   1
  -4  -2   7 84220.2 3196.80   3
  -4   6  -7 88585.2 3477.19   4
   4  -6   7 82289.1 2595.33   2
  -6   2   4 161191. 3335.22   1
  -4  -2   4 154982. 4734.24   3
   4  -6   4 155098. 4256.23   2
  -6   4  -4 173519. 4112.72   1
  -6   4  -4 155280. 4213.53   4
  -2  -4  -4 154839. 4619.98   3
   6  -4   4 164321. 4044.96   1
  -4   6  -4 158416. 4601.08   4
  -2   6   4 167813. 4518.70   3
   2  -6  -4 152525. 4626.26   2
  -2  -4  -1 55952.3 2427.67   3
  -6   2   1 50607.8 1336.00   1
  -2   6   1 57847.2 1970.30   4
   4  -6   1 57425.8 2148.39   2
  -4   6  -1 54409.5 2081.94   4
   2  -6  -1 53606.0 2298.72   2
  -4  -2   1 55999.9 2310.61   3
   6  -4   1 57906.9 1569.61   1
   2   4   1 54704.1 1635.04   4
   2  -6  -1 54607.2 1894.53   4
   4  -6  -2 108067. 3334.28   2
  -4  -2  -2 108730. 3410.67   3
  -2   6  -2 108944. 3362.33   4
   2  -6   2 104124. 3407.50   2
  -6   2  -2 103125. 2702.22   1
   6  -2   2 113344. 2995.11   4
   2   4  -2 104782. 3363.87   4
  -2  -4   2 107233. 3742.31   3
  -2   6  -5 15245.9 1277.47   4
   2  -6   5 15000.5 1074.64   2
   6  -2   5 17603.7 1054.86   4
   2   4  -5 16597.9 1429.87   4
  -6   2  -5 15493.7 884.499   4
  -2  -4   5 15848.0 1348.82   3
   6  -4  -5 16636.0 576.178   1
   4  -6  -5 14943.4 1098.97   2
   6  -2   5 16856.7 959.922   1
  -4  -2  -5 17185.8 1135.95   3
  -2  -4   8 595.106 498.127   3
  -4  -2  -8 1555.26 405.848   3
   2  -6   8 3206.93 649.247   1
   6  -2   8 1085.76 435.802   1
  -4  -2  -8 1462.84 270.654   4
   6  -4  -8 1204.14 243.256   1
   2  -6   8 1517.86 394.976   2
  -2   6  -8 1431.07 709.949   4
   4  -6  -8 564.879 360.742   2
   2   4  -8 1449.29 690.982   4
  -6   2  -8 1273.58 449.044   4
  -2  -4  11 131580. 4589.38   3
   2  -6  11 128029. 4515.96   1
  -2  -4  11 125430. 4380.85   1
   2  -6  11 131487. 3511.05   2
   4  -6 -11 134859. 3876.54   2
  -6   2 -11 134329. 4268.24   4
   6  -2  11 130395. 4172.68   1
   2   4 -11 134916. 5432.34   4
  -2   6 -11 139160. 5484.37   4
  -4  -2 -11 130643. 3973.15   4
  -4  -2 -11 126309. 3659.49   3
   2  -6  14 91588.7 3843.00   1
  -6   4  14 87706.7 3027.79   1
  -2  -4  14 89162.0 3669.63   1
  -4  -2 -14 86803.0 2748.84   3
  -6   2 -14 90595.0 3784.28   4
   4  -6 -14 88920.2 2915.49   2
  -2  -4  14 86547.7 3610.37   3
  -2   6 -14 82118.4 4607.49   4
   2   4 -14 100637. 4913.19   4
   2  -6  14 83465.4 2414.58   2
  -6   4  14 85447.2 2789.86   3
  -4  -2 -14 81692.5 3363.83   4
   6  -2  14 93429.0 3598.90   1
  -4  -2 -17 122550. 4611.20   4
  -2  -4  17 114181. 4749.12   1
   6  -2  17 118086. 4611.37   1
  -4  -2 -17 125882. 3429.98   3
  -2   6 -17 121464. 5914.23   4
  -2  -4  17 129019. 3046.23   2
  -6   4  17 124381. 3529.40   3
   2  -6  17 122659. 4975.77   1
  -6   4  17 120911. 4178.58   1
  -6   2 -17 115230. 4885.13   4
   4  -6 -17 123987. 3642.20   2
   2  -6  20 40872.4 2995.83   1
  -2   6 -20 36343.4 3323.95   4
   6  -2  20 33082.7 2431.67   1
  -2  -4  20 36164.3 2661.81   1
   2   4 -20 43487.0 3495.73   4
  -4  -2 -20 34675.5 2398.03   4
  -6   2 -20 27496.0 2386.54   4
  -2   6 -23 143204. 6891.69   4
   2  -6  23 132277. 6004.42   1
  -6   2 -23 133557. 5825.12   4
  -4  -2 -23 129478. 5372.62   4
   2   4 -23 141869. 6794.88   4
   6  -2  23 131270. 5541.78   1
  -2  -4  23 136412. 5966.22   1
  -2   6 -26 84803.4 5393.56   4
   2  -6  26 79744.1 4783.45   1
   2   4 -26 83256.1 5259.10   4
   6  -2  26 75171.9 4398.55   1
  -2  -4  26 75583.9 4587.52   1
  -6   2 -26 77183.9 4440.22   4
   2  -6  29 95027.3 5678.94   1
  -2   6 -29 114262. 6467.31   4
   2   4 -29 115085. 6610.36   4
  -2  -4  29 106780. 5857.75   1
  -2  -4  32 29125.7 3356.13   1
   4  -6 -32 35203.7 3727.56   4
  -6   5 -32 854.737 1294.55   4
  -5   6 -32 246.613 1236.22   4
  -5  -1  32-313.208 1275.73   1
   5  -6  29 22216.3 2708.41   1
  -6   5 -29 18969.6 2568.89   4
   5   1 -29 22744.4 3045.47   4
  -6   1  29 22931.6 2495.60   1
  -5  -1  29 20667.0 2383.58   1
   6  -5  29 19097.0 2541.71   1
  -5   6 -29 21058.8 2876.78   4
   5  -6  26 31624.0 2968.33   1
   6  -5  26 32700.2 2948.12   1
   5   1 -26 37556.5 3419.19   4
  -6   1  26 32331.0 2700.88   1
  -5  -1  26 28733.1 2632.53   1
  -6   5 -26 27918.5 2966.67   4
  -5   6 -26 31152.1 3247.82   4
   6  -5  23 45179.6 3171.24   1
  -1  -5 -23 41525.1 2792.35   4
  -6   1  23 42540.9 2819.40   1
  -5   6 -23 47103.5 3763.04   4
   5  -6  23 47195.6 3423.39   1
  -6   5 -23 40318.8 3367.66   4
  -5  -1  23 46504.5 3041.92   1
  -6   5 -20 33257.1 2886.88   4
   6  -5  20 32226.5 2539.01   1
  -5   6 -20 31107.7 2988.31   4
  -5  -1  20 34325.9 2152.95   3
   5  -6  20 37321.8 2763.89   1
  -6   1  20 35407.4 2322.39   1
  -1  -5 -20 33434.6 1711.14   2
   1  -6 -20 34754.1 1698.77   2
  -5  -1  20 31604.8 2397.83   1
  -5   6 -17 100300. 5195.96   4
  -1  -5 -17 108055. 3640.00   2
  -6   1  17 106785. 3853.58   3
  -5  -1  17 104724. 3998.44   3
   6  -5  17 106456. 4381.42   1
  -6   1  17 101512. 3867.17   1
   5  -6  17 102000. 4457.21   1
  -5  -1  17 104779. 4127.22   1
   1  -6 -17 106424. 3484.85   2
  -6   5 -17 105926. 5003.32   4
  -6   1  14 141041. 4326.32   1
  -5   6 -14 142913. 5774.09   4
   6  -5  14 134854. 4829.87   1
  -5   6 -14 128117. 3500.13   2
  -6   1  14 134070. 4362.72   3
   1  -6 -14 142406. 4302.54   2
  -5  -1  14 134554. 4455.67   1
  -1  -5 -14 143018. 4529.18   2
  -6   5 -14 138649. 5411.92   4
  -5  -1  14 128215. 4519.89   3
   5  -6  14 135948. 4884.08   1
  -6   1  11 182766. 4777.20   1
   5  -6  11 182055. 5457.47   1
  -1  -5 -11 183841. 4665.01   3
   6  -5  11 171666. 5318.93   1
  -5   6 -11 176488. 6172.53   4
  -5  -1  11 179326. 5039.29   1
  -1   6  11 176212. 4278.64   3
  -6   1  11 180932. 5166.97   3
  -6   5 -11 182464. 5898.06   4
   1  -6 -11 184745. 5288.64   2
  -5  -1  11 172796. 5332.57   3
   1  -6  -8 521506. 12162.6   2
   5  -6   8 532329. 11176.3   2
  -5  -1   8 516571. 11412.7   1
  -1   6   8 529245. 11277.9   3
   5  -6   8 536918. 11858.1   1
  -1  -5  -8 542296. 11667.9   3
  -6   5  -8 521601. 11985.3   4
   1   5   8 502201. 11154.8   3
   6  -5   8 536777. 11672.0   1
  -5   6  -8 516989. 12385.1   4
  -6   1   8 527295. 10922.1   1
  -5  -1   8 515680. 11995.0   3
  -6   1   8 529030. 11601.7   3
  -5  -1   5 198987. 5499.87   3
   5  -6   5 207697. 5060.29   2
  -1  -5  -5 186440. 5453.67   3
   6  -5   5 206593. 5010.05   1
  -6   1   5 195074. 5183.68   3
   1  -6  -5 193412. 5800.23   2
  -1   6   5 196784. 5296.20   3
  -6   5  -5 202564. 5300.33   4
  -5   6  -5 201535. 5493.43   4
  -1  -5  -5 200034. 4310.85   4
   5  -6   5 200169. 5228.83   1
   1   5   5 210070. 5378.79   3
   1   5   2 91730.5 2368.45   4
   5  -6   2 91864.6 2931.38   2
  -1  -5  -2 89433.6 2440.70   4
  -5  -1   2 92457.0 3113.11   3
   1  -6  -2 92142.4 2601.22   4
   6  -5   2 94568.3 2541.12   1
  -6   5  -2 96206.8 2942.63   4
   1  -6  -2 87486.3 3442.91   2
  -1  -5  -2 92656.7 3398.88   3
  -5   6  -2 92560.6 3021.43   4
  -1  -5   1 24804.4 1370.01   4
   1   5  -1 23632.8 1239.71   4
  -1   6  -1 20624.2 1202.65   4
   5  -6  -1 24379.1 1334.39   2
   1  -6   1 21249.0 1511.53   2
  -1  -5   1 22770.2 1594.26   3
  -5  -1  -1 24049.3 1385.71   3
  -1   6  -4 13258.3 1161.19   4
   6  -1   4 13690.4 801.675   4
   1   5  -4 13030.5 1216.23   4
   5   1   4 13808.8 616.721   4
   1  -6   4 13500.0 1135.80   2
  -1  -5   4 13327.7 1286.52   3
   5  -6  -4 13012.0 1001.29   2
   6  -1   7 27703.7 1431.10   4
  -5  -1  -7 23526.1 910.113   4
  -6   1  -7 22595.4 1136.32   4
  -1  -5   7 26575.6 1859.64   3
   1   5  -7 27827.8 2043.88   4
  -1   6  -7 25463.0 1882.31   4
   1  -6   7 23832.6 1411.81   2
   6  -5  -7 25397.2 958.002   1
   5  -6  -7 23678.7 1384.71   2
   1  -6  10 119640. 4364.33   1
  -1   6 -10 131965. 5306.93   4
  -1  -5  10 120973. 4443.36   3
  -1  -5  10 130094. 4397.04   1
   6  -1  10 128808. 4038.02   1
  -6   1 -10 128275. 3745.11   4
   1   5 -10 123591. 5151.40   4
   5  -6 -10 124496. 3701.74   2
   1  -6  10 119286. 3545.95   2
  -5  -1 -10 122957. 3484.19   4
   1   5 -13 14987.9 1996.50   4
   1  -6  13 15744.7 1528.35   1
  -6   1 -13 17112.7 1391.34   4
   5  -6 -13 20461.8 1243.09   2
  -1  -5  13 20060.9 1664.17   1
  -5  -1 -13 17303.3 1334.63   4
   1  -6  13 18605.4 1007.95   2
  -1  -5  13 17212.3 1092.63   2
  -1   6 -13 19504.4 2240.14   4
   6  -1  13 17472.1 1490.82   1
  -6   5  16 70663.7 2285.30   3
  -1  -5  16 70312.7 2098.03   2
  -1  -5  16 71761.3 3494.43   1
  -5  -1 -16 72651.5 2452.29   3
   1  -6  16 66824.2 1938.86   2
  -6   1 -16 69709.0 3346.61   4
   1   5 -16 73328.9 4399.87   4
   5  -6 -16 70935.3 2517.22   2
  -1   6 -16 69520.9 4357.45   4
  -5  -1 -16 64958.5 3127.07   4
   6  -1  16 68905.2 3270.91   1
   1  -6  16 70750.7 3543.70   1
  -6   1 -19 126900. 5139.58   4
   6  -1  19 127413. 5025.06   1
   1  -6  19 119104. 5227.39   1
   1   5 -19 135284. 6333.95   4
  -5  -1 -19 126446. 4919.47   4
  -1   6 -19 125687. 6198.68   4
  -1  -5  19 124249. 5202.10   1
  -5  -1 -22 44614.0 2939.11   4
   6  -1  22 49797.2 3191.60   1
  -6   1 -22 48334.9 3190.09   4
   1   5 -22 52161.6 3965.48   4
   1  -6  22 55718.0 3631.78   1
  -1   6 -22 48384.3 3972.58   4
  -1  -5  22 45826.5 3270.84   1
  -1   6 -25 49115.2 4221.70   4
  -6   1 -25 46044.5 3277.15   4
  -5  -1 -25 52995.3 3309.36   4
  -1  -5  25 54858.5 3835.40   1
   1  -6  25 50434.9 3769.04   1
   1   5 -25 57736.6 4352.94   4
  -1  -5  28 14986.7 2281.29   1
   1   5 -28 20908.3 2863.39   4
   1  -6  28 19726.2 2594.10   1
  -1   6 -28 17362.9 2612.26   4
   1   5 -31 79825.0 5604.39   4
  -1   6 -31 73940.6 5368.17   4
  -1  -5  31 70869.8 5002.92   1
   1  -6  31 72507.6 5080.54   1
  -6   6 -30 169492. 8098.92   4
   6   0 -30 195398. 8896.10   4
   6  -6  30 171097. 7831.02   1
  -6   0  30 170619. 7303.41   1
   6  -6  27 198209. 7969.52   1
  -6   6 -27 191982. 8399.08   4
  -6   0  27 199157. 7482.62   1
   6  -6  24 213399. 7991.73   1
  -6   0  24 225578. 7617.49   1
  -6   6 -24 234139. 9022.76   4
  -6   6 -21 298701. 10392.8   4
  -6   0  21 313828. 8924.07   1
   6  -6  21 299356. 9419.33   1
  -6   0  18 211977. 6361.32   3
  -6   6 -18 217430. 8035.44   4
   0  -6 -18 204404. 5802.56   2
  -6   0  18 220672. 6618.62   1
   6  -6  18 212749. 7120.16   1
   0  -6 -15 137358. 4465.89   2
  -6   0  15 137638. 4673.97   3
  -6   0  15 136715. 4530.46   1
   6  -6  15 139317. 5056.03   1
  -6   6 -15 139341. 5741.07   4
  -6   0  12 57358.9 2383.29   1
   6  -6  12 52604.9 2668.57   1
  -6   6 -12 57742.2 3182.14   4
   0  -6 -12 57348.4 2714.27   2
  -6   0  12 57517.9 2650.47   3
  -6   6  -9 23704.9 1778.26   4
  -6   0   9 26265.2 1680.57   3
   6  -6   9 27137.5 1657.72   1
   0  -6  -9 26283.6 1829.75   2
   0  -6  -9 29300.8 1507.01   3
  -6   0   9 28057.7 1415.72   1
   0   6   9 26192.3 1366.94   3
   0  -6  -6 1087.85 541.271   3
   0  -6  -6 408.178 534.201   2
  -6   6  -6 2240.36 561.221   4
  -6   0   6 738.039 437.195   3
   6  -6   6 1556.85 497.535   1
   0  -6  -3 2194.44 644.886   3
   6  -6   3 1957.76 414.112   1
   6  -6   3 2355.82 502.543   2
  -6   0   3 1783.59 514.195   3
  -6   6  -3 1884.60 492.144   4
   0  -6  -3 2314.67 329.492   4
   0  -6   0 263232. 6247.82   4
   0  -6   0 255535. 7155.20   3
   6  -6   0 271457. 6497.13   2
   0   6   0 271216. 6225.78   4
   6   0   3 367469. 7804.60   4
   0  -6   3 398240. 9649.23   3
   0   6  -3 355858. 8826.54   4
   6  -6  -3 389077. 8635.10   2
   0   6  -6 422734. 10559.1   4
   6  -6  -6 411629. 9400.69   2
   0  -6   6 414357. 10418.6   3
  -6   0  -6 424512. 8544.41   4
   6   0   6 406368. 8965.63   4
   6  -6  -9 864021. 17974.0   2
   0   6  -9 886490. 20255.2   4
  -6   0  -9 862251. 17439.1   4
   0  -6   9 909856. 18358.5   2
   6   0   9 838911. 18131.5   4
   0   6 -12 406538. 12048.3   4
   6  -6 -12 433716. 9652.60   2
  -6   0 -12 446749. 9848.36   4
   0  -6  12 422221. 10741.2   1
   0  -6  12 404765. 9517.91   2
  -6   6  15 306609. 6774.13   3
  -6   0 -15 317576. 8250.81   4
   0  -6  15 301553. 8737.85   1
   0   6 -15 287601. 9927.98   4
   0  -6  15 308977. 6930.61   2
  -6   0 -18 370276. 10196.3   4
   0  -6  18 390353. 10832.5   1
   0   6 -18 400255. 12534.4   4
   0  -6  21 611611. 16005.6   1
  -6   0 -21 600365. 15244.7   4
   0   6 -21 645374. 17687.8   4
   0  -6  24 152098. 6655.99   1
  -6   0 -24 139858. 5824.62   4
   0  -6  27 32428.6 3141.14   1
   0   6 -27 41154.9 3855.72   4
   0  -6  30 2620.79 1383.48   1
   0   6 -30 7713.16 2038.88   4
  -4  -3  32 50211.3 4143.35   1
   4  -7  29 74560.2 5000.84   1
   4   3 -29 76110.1 5348.70   4
  -4  -3  29 74784.8 4733.84   1
   7  -4  29 75640.7 4803.65   1
  -4   7 -29 79083.7 5428.34   4
  -7   4 -29 73693.2 4691.80   4
   4  -7  26 97507.7 5327.38   1
  -4   7 -26 92373.2 5658.47   4
  -7   4 -26 81262.2 4826.83   4
   7  -4  26 77392.1 4598.09   1
   4   3 -26 96480.4 5727.19   4
  -4  -3  26 94636.4 5052.48   1
  -4   7 -23 109562. 6110.69   4
  -7   3  23 110546. 4609.99   1
  -4  -3  23 112192. 5217.57   1
  -7   4 -23 94373.5 5151.61   4
   4  -7  23 104345. 5313.22   1
   4   3 -23 112828. 5865.96   4
  -3  -4 -23 110055. 4618.47   4
   7  -4  23 103409. 4920.00   1
   4   3 -20 67502.2 4277.76   4
   7  -4  20 63583.9 3476.30   1
  -3  -4 -20 63622.9 3209.09   4
  -7   4 -20 57178.3 3710.71   4
  -4   7 -20 62828.2 4359.56   4
  -7   3  20 63635.0 3047.39   1
  -4  -3  20 66734.9 3655.95   1
   3  -7 -20 62640.6 2475.33   2
   4  -7  20 67184.8 3862.22   1
  -3  -4 -17 98553.4 2729.69   3
  -7   3  17 96662.1 3609.50   1
   3  -7 -17 95125.9 3309.57   2
   4  -7  17 103549. 4515.48   1
  -4   7 -17 102397. 5346.19   4
  -3  -4 -17 97061.6 3723.41   2
  -4  -3  17 102523. 4158.40   3
  -3  -4 -17 107781. 4002.61   4
  -7   4 -17 96310.4 4504.07   4
  -4  -3  17 102363. 4221.99   1
  -7   3  17 103176. 3572.50   3
   7  -4  17 101958. 4187.29   1
  -4  -3  14 15292.6 1493.94   3
   4  -7  14 12422.0 1442.29   1
  -3  -4 -14 14824.1 1235.27   4
   7  -4  14 12026.4 1339.84   1
  -7   3  14 14241.6 1089.80   1
  -7   3  14 13378.5 1127.97   3
  -3   7  14 14273.5 636.547   3
  -4   7 -14 13463.6 1801.36   4
  -7   4 -14 15579.8 1614.99   4
   3  -7 -14 12693.9 1082.01   2
  -3  -4 -14 14165.2 1020.63   3
  -4  -3  14 15061.5 1410.41   1
   7  -4  11 47377.0 2352.78   1
  -4  -3  11 52790.6 2681.31   3
  -7   3  11 47791.2 1849.72   1
  -7   3  11 51882.9 2147.59   3
  -3  -4 -11 52153.7 2111.62   4
  -4   7 -11 50260.4 3100.80   4
  -7   4 -11 56194.9 2592.49   4
   3  -7 -11 53770.9 2371.85   2
  -4  -3  11 51701.2 2468.54   1
   4  -7  11 51071.1 1963.86   2
  -3   7  11 49318.7 1863.56   3
  -3  -4 -11 51954.8 2209.62   3
   4  -7  11 51499.8 2653.65   1
   4  -7   8 32936.8 1580.92   2
  -3  -4  -8 34534.8 1252.71   4
   4  -7   8 31352.6 1911.19   1
  -7   4  -8 35803.9 1771.21   4
  -7   3   8 32754.4 1153.68   1
   7  -4   8 33504.8 1694.94   1
  -4   7  -8 35977.6 2267.58   4
   3  -7  -8 35818.3 1898.99   2
  -3   7   8 30958.5 1578.43   3
  -3  -4  -8 31514.3 1759.64   3
  -4  -3   8 32905.0 2069.42   3
  -3  -4  -5 41053.4 2078.98   3
   3  -7  -5 42081.1 2107.17   2
  -4   7  -5 40364.6 2150.91   4
   4  -7   5 40490.8 1842.87   2
   7  -4   5 38691.6 1621.56   1
  -7   4  -5 42101.3 1782.67   4
  -4  -3   5 42158.3 2235.68   3
  -4   7  -2 47021.7 2112.34   4
   3  -7  -2 45643.8 2192.32   2
   3   4   2 48743.7 1332.31   4
  -7   4  -2 49600.7 1594.38   1
  -3  -4  -2 44561.8 2265.08   3
  -4  -3   2 48419.5 2391.57   3
   4  -7   2 47421.2 2073.44   2
   7  -4   2 48052.5 1522.12   1
   3   4  -1 40282.1 1729.15   4
   3  -7   1 37657.2 1949.77   2
  -3   7  -1 37115.4 1756.72   4
   7  -4  -1 38177.4 939.542   1
   4  -7  -1 36161.6 1852.27   2
  -4  -3  -1 35256.5 1950.05   3
  -7   3  -1 35393.9 1235.77   1
  -3  -4   1 38721.1 2116.95   3
   7  -3   4 85955.9 2469.55   1
   3  -7   4 83670.8 2941.45   2
  -3   7  -4 78052.8 3059.10   4
   3   4  -4 82283.8 3257.51   4
  -3  -4   4 79632.1 3344.09   3
   4  -7  -4 83153.7 3021.36   2
  -4  -3  -4 79786.5 3027.59   3
  -3  -4   7 75805.6 3283.17   3
   4  -7  -7 76782.7 2899.41   2
  -7   3  -7 77602.2 2609.81   4
   7  -4  -7 76215.2 1926.11   1
   3  -7   7 75348.6 2688.76   2
  -3   7  -7 79021.5 3421.56   4
  -4  -3  -7 77042.4 2881.23   3
   7  -3   7 78443.5 2650.14   1
  -3   7 -10 132306. 5177.84   4
  -4  -3 -10 116976. 3808.29   3
   7  -4 -10 125045. 3290.09   1
   3  -7  10 127009. 4518.70   1
  -4  -3 -10 130107. 3407.13   4
   3  -7  10 124057. 3593.16   2
  -7   3 -10 131267. 4022.02   4
  -3  -4  10 127575. 4317.29   1
   4  -7 -10 126041. 3959.55   2
   7  -3  10 119118. 3930.75   1
  -3  -4  10 120873. 4475.67   3
  -7   4  13 106727. 3409.26   3
   3   4 -13 122682. 5310.27   4
  -7   4  13 113882. 3410.99   1
  -4  -3 -13 116318. 3590.37   3
   3  -7  13 116117. 3211.71   2
   4  -7 -13 113457. 3650.81   2
  -3  -4  13 104568. 4159.33   1
   3  -7  13 110898. 4380.04   1
  -3  -4  13 113984. 4390.50   3
   7  -3  13 111358. 4074.75   1
  -7   3 -13 119512. 4257.64   4
  -4   7  13 115131. 3044.07   3
  -4  -3 -13 105499. 3649.65   4
  -3   7 -13 114884. 5245.63   4
   4  -7 -16 299152. 7307.91   2
   3  -7  16 298819. 8804.40   1
  -4  -3 -16 303438. 7071.18   3
  -3  -4  16 308577. 8496.10   3
  -3   7 -16 293654. 10013.5   4
  -7   4  16 287881. 7494.18   1
  -7   3 -16 310166. 8773.15   4
  -3  -4  16 286387. 8427.67   1
   3   4 -16 319881. 10055.3   4
  -7   4  16 301282. 7395.18   3
   7  -3  16 299558. 8306.11   1
  -4  -3 -16 277017. 7848.65   4
   4  -7 -19 168924. 4690.93   2
   3   4 -19 188887. 7535.48   4
  -7   3 -19 163865. 6319.46   4
  -3   7 -19 157892. 7277.50   4
   7  -3  19 169351. 6003.39   1
  -4  -3 -19 166831. 5649.85   4
  -4  -3 -19 166616. 5137.72   2
  -7   4  19 176541. 5458.66   1
  -3  -4  19 161639. 6087.37   1
   3  -7  19 162169. 6345.13   1
   7  -3  22 116895. 5089.59   1
  -3  -4  22 109928. 5154.00   1
   3   4 -22 120329. 6117.22   4
  -4  -3 -22 113349. 4684.27   4
  -7   3 -22 105618. 5197.60   4
   3  -7  22 110371. 5343.46   1
  -3   7 -22 112652. 6190.00   4
  -3   7 -25 50063.4 4158.99   4
  -7   3 -25 44168.6 3419.46   4
   3   4 -25 43059.9 3861.23   4
  -3  -4  25 45506.6 3420.30   1
   3  -7  25 39903.6 3390.90   1
   7  -3  25 47955.6 3431.69   1
   3   4 -28 31422.7 3433.74   4
   3  -7  28 28252.7 3121.04   1
  -3  -4  28 26129.2 2843.70   1
  -7   3 -28 29993.4 2905.90   4
   7  -3  28 27494.2 2843.29   1
  -3   7 -28 28447.4 3352.24   4
  -3   7 -31 18502.5 2742.53   4
  -3  -4  31 21852.0 2819.02   1
  -7   5 -30 5844.65 1698.92   4
   7  -5  30 7042.70 1887.16   1
  -5   7 -30 631.188 1432.83   4
   5  -7  30 4894.42 1657.56   1
   5   2 -30 6760.75 2031.77   4
  -5  -2  30 2537.77 1392.04   1
  -7   2  27-408.805 920.357   1
   5   2 -27 3564.38 1591.06   4
  -5   7 -27-2084.05 1659.51   4
  -7   5 -27 173.038 1066.70   4
   5  -7  27 1095.21 1208.50   1
  -5  -2  27 1331.69 959.734   1
   7  -5  27 433.131 1048.37   1
   5  -7  24 1529.80 1276.53   1
   5   2 -24 448.836 1075.56   4
  -7   2  24 3275.12 1020.49   1
  -5   7 -24 1260.16 1151.07   4
  -5  -2  24 1904.86 1061.72   1
  -7   5 -24 1329.05 941.798   4
   7  -5  24 3472.60 1235.14   1
  -5   7 -21 1486.09 1128.30   4
   5  -7  21 2660.34 1134.39   1
  -2  -5 -21 971.619 638.368   4
  -7   5 -21 953.097 886.453   4
  -7   2  21 1381.66 772.985   1
   7  -5  21 3107.26 1070.82   1
  -5  -2  21 1174.45 822.627   1
  -2  -5 -18 6960.93 907.071   2
   5  -7  18 6022.60 1242.04   1
   7  -5  18 7094.91 1318.29   1
  -5  -2  18 4939.75 918.178   3
  -7   5 -18 5656.75 1254.87   4
  -7   2  18 6877.18 964.750   1
  -5  -2  18 6024.39 1111.62   1
  -5   7 -18 1987.70 1050.21   4
   2  -7 -18 6379.79 822.328   2
  -7   2  18 5453.10 906.222   3
   2  -7 -15 4640.18 776.993   2
  -7   2  15 3862.89 647.633   1
  -5  -2  15 3666.78 850.127   3
  -5  -2  15 4617.42 947.356   1
  -7   2  15 3782.41 695.062   3
  -5   7 -15 2419.93 976.273   4
   5  -7  15 5145.83 1127.69   1
  -2  -5 -15 5139.97 540.879   3
   7  -5  15 4394.79 907.392   1
  -2  -5 -15 3107.03 710.368   2
  -7   5 -15 4328.16 1086.72   4
  -2  -5 -12 31783.1 1639.35   3
   5  -7  12 35262.9 2197.44   1
  -5   7 -12 32139.0 2531.13   4
  -7   2  12 33282.3 1606.12   1
  -5  -2  12 38398.0 2071.74   1
   7  -5  12 34174.8 2030.40   1
   2  -7 -12 37144.7 2010.86   2
  -5  -2  12 34407.5 2161.33   3
  -2   7  12 30786.6 1356.78   3
  -7   5 -12 30720.7 2198.93   4
  -7   2  12 33591.4 1864.03   3
  -5  -2   9 5869.60 958.671   3
  -2   7   9 5753.99 647.942   3
   5  -7   9 5816.18 682.768   2
  -5   7  -9 4246.48 930.013   4
  -7   5  -9 5636.26 852.019   4
   5  -7   9 6160.32 927.117   1
  -2  -5  -9 6237.86 768.032   3
  -5  -2   9 4898.00 704.763   1
  -7   2   9 6209.72 561.601   1
   2  -7  -9 5463.53 873.078   2
   7  -5   9 7486.00 872.237   1
  -7   2   9 7211.16 816.744   3
  -7   5  -6 43443.7 1991.93   4
   5  -7   6 44300.4 2129.07   1
   7  -5   6 41945.6 1809.95   1
   2  -7  -6 41843.2 2228.80   2
  -2  -5  -6 42105.6 1159.05   4
  -7   2   6 41356.1 1260.18   1
  -2  -5  -6 40932.4 2140.96   3
   5  -7   6 42858.3 1863.52   2
  -5  -2   6 42107.9 2231.19   3
  -5   7  -6 46262.6 2315.69   4
  -5   7  -3 71098.0 2773.39   4
  -2  -5  -3 70972.3 3009.20   3
   7  -5   3 69082.9 2174.09   1
  -7   5  -3 72384.8 2283.78   1
   5  -7   3 71717.0 2621.32   2
   2  -7  -3 73148.8 3032.42   2
  -5  -2   3 73265.1 2945.56   3
  -2  -5  -3 71545.2 1969.54   4
  -7   2   0 4671.85 380.218   1
   7  -5   0 4826.09 376.540   1
   5  -7   0 4607.43 704.109   2
  -5  -2   0 4527.67 730.756   3
   2   5   0 5981.71 579.365   4
  -2  -5   0 5487.77 943.583   3
   2  -7   0 5812.97 856.622   2
  -2   7   0 4291.21 572.326   4
   5   2   3 2706.18 218.325   4
  -7   2  -3 2508.98 347.799   1
  -2   7  -3 1943.08 606.633   4
  -2  -5   3 2803.94 698.015   3
   2   5  -3 2194.88 537.606   4
   7  -2   3 2222.51 370.030   4
  -5  -2  -3 3066.68 677.934   3
   2  -7   3 2941.51 674.287   2
   5  -7  -3 2792.46 588.195   2
  -7   2  -6 1693.82 345.888   4
   2  -7   6 2520.30 585.091   2
   7  -2   6 1887.32 413.412   1
  -5  -2  -6 1871.56 539.217   3
   7  -5  -6 2269.51 232.425   1
  -2  -5   6 1042.38 632.717   3
   7  -2   6 1074.40 346.861   4
   2   5  -6 1338.30 616.411   4
  -2   7  -6 1337.95 634.648   4
   5  -7  -6 2262.73 583.595   2
  -5  -2  -9 7654.66 878.949   3
   7  -2   9 7445.22 879.729   1
  -2   7  -9 7276.66 1147.20   4
   7  -5  -9 8899.53 622.947   1
   2  -7   9 7274.46 791.920   2
   2   5  -9 6194.11 1129.80   4
  -2  -5   9 6695.47 1034.56   3
  -5  -2  -9 8903.06 556.346   4
   2  -7   9 6379.17 993.098   1
  -7   2  -9 8201.34 774.553   4
   5  -7  -9 8638.37 897.841   2
  -2  -5  12 7162.25 1109.51   3
  -2   7 -12 9830.96 1656.19   4
  -5  -2 -12 7361.92 814.262   3
  -7   2 -12 7880.68 942.298   4
   2  -7  12 6601.40 1113.89   1
  -2  -5  12 6965.63 1052.35   1
   2   5 -12 9108.91 1502.83   4
   7  -2  12 6214.77 920.222   1
  -5  -2 -12 6210.69 683.551   4
   5  -7 -12 8116.59 902.587   2
   2  -7  12 6334.29 676.007   2
   2  -7  15 16762.2 1774.65   1
   2  -7  15 20224.1 1056.98   2
  -5  -2 -15 20017.7 1493.98   4
  -5   7  15 18473.0 869.648   3
  -5  -2 -15 19531.6 1262.00   3
  -7   2 -15 17343.2 1601.92   4
  -2   7 -15 19929.7 2343.15   4
  -2  -5  15 19300.1 1823.03   1
  -2  -5  15 20117.3 1752.94   3
   7  -2  15 17445.7 1623.21   1
   5  -7 -15 17718.1 1271.67   2
   2   5 -15 22432.0 2495.56   4
  -2  -5  15 18152.2 1218.11   2
  -7   5  15 20106.3 1200.61   3
  -7   2 -18 3253.02 855.056   4
  -2  -5  18 4618.29 1085.41   1
   7  -2  18 4871.73 1105.45   1
   5  -7 -18 4938.98 705.863   2
   2  -7  18 4198.55 1169.92   1
  -2   7 -18 1869.70 1061.01   4
   2   5 -18 4467.88 1751.95   4
  -5  -2 -18 5297.79 887.093   4
  -5  -2 -18 5193.26 626.639   3
  -5  -2 -21 16983.6 1699.67   4
   2  -7  21 18546.3 2110.73   1
  -2  -5  21 20365.2 2136.79   1
  -7   2 -21 18726.9 1975.03   4
   2   5 -21 17155.5 2494.64   4
  -2   7 -21 16675.5 2393.32   4
   7  -2  21 17922.8 1924.88   1
  -2   7 -24-1233.72 1535.00   4
   7  -2  24 2189.25 1206.39   1
   2   5 -24 1907.77 1439.94   4
  -2  -5  24 761.648 985.876   1
  -7   2 -24 644.472 782.826   4
   2  -7  24 241.138 969.789   1
   2  -7  27-900.242 1287.57   1
  -2  -5  27 727.210 1081.28   1
  -2   7 -27-619.441 1303.17   4
   2   5 -27-1696.22 1574.04   4
   2   5 -30 5093.55 1840.99   4
   2  -7  30-430.527 1363.62   1
  -2   7 -30 3461.57 1789.56   4
  -2  -5  30 1406.89 1425.05   1
  -7   6 -31 19652.6 2682.02   4
  -6   7 -31 20208.9 2849.80   4
  -6  -1  28 11796.1 1897.58   1
   6  -7  28 9584.68 1877.18   1
  -7   1  28 10196.5 1622.89   1
   6   1 -28 15167.5 2662.36   4
  -6   7 -28 10608.4 2132.60   4
   7  -6  28 9927.16 1998.33   1
  -7   6 -28 9350.52 1914.36   4
   6  -7  25 12311.4 1919.18   1
  -6  -1  25 10784.6 1658.62   1
  -7   6 -25 14249.1 2256.45   4
  -6   7 -25 12831.6 2317.84   4
  -7   1  25 14527.3 1826.10   1
   7  -6  25 13684.2 2028.18   1
  -6  -1  22 1091.75 808.582   1
   6  -7  22 1540.19 980.816   1
  -7   6 -22 1909.31 1009.74   4
   7  -6  22 894.904 1010.97   1
  -7   1  22 1230.70 757.403   1
  -6   7 -22 1273.78 1155.26   4
   7  -6  19 8082.44 1315.89   1
  -6  -1  19 8789.36 1257.69   1
  -6  -1  19 7272.89 1151.31   3
  -7   1  19 8978.74 1218.26   1
   6  -7  19 7012.36 1416.84   1
  -7   6 -19 7916.73 1545.22   4
  -6   7 -19 5418.63 1358.95   4
  -7   1  19 8504.55 1127.53   3
  -1  -6 -19 7805.39 966.692   2
   1  -7 -19 7758.61 935.661   2
   1  -7 -16 108064. 3787.24   2
  -7   6 -16 105803. 4950.26   4
   6  -7  16 97321.3 4376.40   1
  -7   1  16 103938. 3796.81   1
  -7   1  16 103132. 3942.02   3
  -6  -1  16 104080. 4145.06   3
   7  -6  16 101922. 4285.50   1
  -6   7 -16 104138. 5103.16   4
  -1  -6 -16 98606.0 3830.62   2
  -6  -1  16 102463. 3985.71   1
   7  -6  13 48048.7 2613.25   1
  -7   6 -13 49432.1 2968.07   4
  -6   7 -13 49069.8 3139.42   4
  -1   7  13 47677.6 1668.86   3
  -6  -1  13 50183.8 2395.68   1
  -1  -6 -13 47597.1 2659.04   2
  -7   1  13 47275.1 2429.59   3
  -6  -1  13 48057.0 2591.55   3
  -7   1  13 50786.0 2204.49   1
   6  -7  13 49721.9 2683.50   1
  -1  -6 -13 49744.7 1951.37   3
   1  -7 -13 54143.9 2570.11   2
   1  -7 -10 135618. 4625.51   2
   1   6  10 127907. 3678.13   3
  -6  -1  10 132414. 4027.48   1
  -7   1  10 135112. 4311.46   3
  -7   1  10 127232. 3626.24   1
   6  -7  10 123757. 4317.70   1
  -1  -6 -10 128764. 4060.70   3
  -7   6 -10 132495. 4649.65   4
  -6   7 -10 131395. 4899.37   4
  -6  -1  10 131787. 4499.93   3
  -1   7  10 132892. 3803.09   3
   7  -6  10 130995. 4303.33   1
  -7   1   7 248655. 5756.85   1
   7  -6   7 254256. 6419.40   1
  -6   7  -7 260464. 7090.65   4
   1  -7  -7 269848. 7326.97   2
   6  -7   7 245446. 6586.25   1
  -7   6  -7 247234. 6737.57   4
  -1  -6  -7 254021. 6828.38   3
   6  -7   7 254575. 6267.43   2
  -6  -1   7 260481. 6950.93   3
  -7   1   7 254593. 6565.48   3
  -1  -6  -4 637043. 14790.2   3
  -6  -1   4 685804. 14615.9   3
   6  -7   4 681494. 14131.8   2
  -1  -6  -4 661471. 13122.5   4
  -7   6  -4 655820. 14233.4   4
  -6   7  -4 660424. 14397.9   4
   1  -7  -4 651383. 15206.9   2
   1  -7  -4 647878. 13469.4   4
   7  -6   4 682156. 13736.6   1
   6  -7   4 629346. 14005.7   1
   1   6   1 239802. 5430.93   4
  -6  -1   1 232141. 6208.54   3
  -1  -6  -1 232669. 6719.44   3
  -1  -6  -1 224435. 5577.52   4
   6  -7   1 241915. 6033.95   2
   1  -7  -1 239103. 6860.14   2
  -1   7   1 236906. 5660.39   4
   7  -6   1 227666. 5291.19   1
   6  -7  -2 239461. 6194.76   2
  -1  -6   2 256565. 7105.31   3
  -1   7  -2 240774. 6233.04   4
  -7   1  -2 234312. 5396.32   1
   1   6  -2 236704. 6130.46   4
  -6  -1  -2 242303. 6263.27   3
   1  -7   2 240389. 6778.59   2
   6   1   5 151620. 3461.63   4
   7  -1   5 145028. 3819.48   4
   1   6  -5 143579. 4864.33   4
   1  -7   5 145369. 4645.46   2
   6  -7  -5 143694. 4340.70   2
  -1  -6   5 148435. 5108.07   3
  -1   7  -5 137645. 4746.75   4
  -7   1  -8 177485. 4454.78   4
   1   6  -8 193213. 6518.34   4
  -1   7  -8 185895. 6272.54   4
   6  -7  -8 182818. 5098.11   2
   7  -6  -8 176371. 4189.46   1
  -6  -1  -8 188079. 4090.10   4
   1  -7   8 189599. 5291.58   2
   7  -1   8 186112. 5097.75   4
  -1  -6   8 175894. 5886.13   3
   6  -7 -11 32191.1 1703.28   2
  -7   1 -11 34184.3 1641.24   4
  -1  -6  11 33898.9 2157.02   1
  -1   7 -11 35475.0 2734.57   4
   1  -7  11 31215.4 2133.88   1
  -6  -1 -11 30631.6 1405.43   4
   1   6 -11 30263.0 2523.74   4
  -1  -6  11 29578.2 2134.53   3
   1  -7  11 31861.1 1650.77   2
   1   6 -14 31654.2 2823.93   4
  -1  -6  14 36440.2 2412.31   1
  -1  -6  14 34142.5 1726.70   2
   1  -7  14 32950.0 1565.64   2
   6  -7 -14 36421.4 1821.66   2
  -6  -1 -14 38269.0 1934.68   4
  -1   7 -14 34012.9 2898.68   4
   1  -7  14 32770.1 2344.80   1
  -7   1 -14 34331.0 1974.62   4
  -1  -6  17 1288.34 851.664   1
  -1  -6  17 1354.66 370.935   2
   1  -7  17 592.078 929.387   1
  -6  -1 -17 344.537 546.173   4
  -1   7 -17 630.642 1127.64   4
  -6  -1 -17 618.072 423.379   3
   1  -7  17 1307.21 343.360   2
  -7   1 -17 697.355 541.274   4
  -7   6  17 453.420 326.770   3
   1   6 -17-44.1179 1018.62   4
   1  -7  20 828.973 846.254   1
   1   6 -20-999.939 1187.13   4
  -6  -1 -20 209.338 538.339   4
  -7   1 -20-290.806 693.575   4
  -1  -6  20 3218.96 1177.65   1
  -1   7 -20 126.103 1171.96   4
  -6  -1 -23 11538.1 1491.75   4
  -1  -6  23 13664.2 2022.36   1
  -1   7 -23 12426.3 2305.56   4
  -7   1 -23 11232.4 1546.89   4
   1   6 -23 13357.5 2208.34   4
   1  -7  23 12593.5 1931.44   1
   1   6 -26 19405.3 2778.51   4
  -1   7 -26 21054.7 2852.60   4
  -1  -6  26 20339.0 2494.01   1
   1  -7  26 21749.2 2607.48   1
  -1   7 -29 54038.5 4594.75   4
   1  -7  29 47727.5 4055.44   1
   1   6 -29 52794.4 4521.44   4
  -1  -6  29 44008.1 3827.90   1
  -7   7 -29 16114.2 2526.54   4
   7  -7  29 13653.4 2190.12   1
   7   0 -29 11110.2 2300.16   4
  -7   0  26 22143.1 2233.88   1
  -7   7 -26 16610.6 2410.90   4
   7  -7  26 17918.9 2312.46   1
   7  -7  23 53626.5 3656.59   1
  -7   0  23 55436.2 3316.76   1
  -7   7 -23 53936.8 4071.19   4
  -7   7 -20 18803.1 2362.13   4
   0  -7 -20 19656.2 1482.22   2
  -7   0  20 19631.9 1769.79   3
  -7   0  20 22265.7 1907.63   1
   7  -7  20 23390.6 2239.10   1
  -7   0  17 304303. 8427.35   3
  -7   7 -17 282199. 9653.71   4
   0  -7 -17 306990. 8007.67   2
  -7   0  17 300276. 8162.97   1
   7  -7  17 288408. 8795.51   1
  -7   7 -14 207930. 7254.84   4
   7  -7  14 203231. 6538.56   1
   0  -7 -14 218453. 6415.83   2
  -7   0  14 208822. 5911.04   1
  -7   0  14 211996. 6404.41   3
   0   7  11 256432. 6365.00   3
  -7   0  11 276861. 7424.28   3
  -7   7 -11 262873. 7808.06   4
  -7   0  11 262044. 6582.29   1
   0  -7 -11 266401. 7637.29   2
   7  -7  11 268000. 7298.86   1
   0  -7  -8 158790. 4765.11   3
   0  -7  -8 156857. 5435.61   2
  -7   0   8 147654. 4145.43   1
   7  -7   8 154815. 4632.31   1
  -7   7  -8 150892. 5002.97   4
  -7   0   8 155442. 4884.61   3
  -7   0   5 791510. 17151.3   3
  -7   7  -5 824937. 17182.7   4
   0  -7  -5 764530. 17443.3   3
   0  -7  -5 791022. 15953.1   4
   7  -7   5 821747. 16747.2   1
  -7   0   2 145452. 4397.41   3
   7  -7   2 144269. 4205.25   2
   7  -7   2 140360. 3823.20   1
   0  -7  -2 141815. 3718.50   4
   0  -7  -2 131118. 4723.16   3
   0   7   2 137192. 3675.14   4
   0   7  -1 55791.1 2228.39   4
   7  -7  -1 56071.0 2343.40   2
   0  -7   1 55588.5 2887.17   3
   0   7  -4 7374.75 982.058   4
   0  -7   4 9030.14 1293.12   3
   7   0   4 7896.84 587.699   4
   7  -7  -4 8390.35 944.630   2
   7   0   7 4855.52 549.026   4
   0  -7   7 2460.67 642.483   2
   0   7  -7 3584.86 892.731   4
   0  -7   7 3378.22 910.795   3
   7  -7  -7 3660.70 651.293   2
   0  -7  10 43471.3 2528.04   1
   0   7 -10 43810.9 2983.70   4
   7  -7 -10 39879.1 1977.15   2
  -7   0 -10 40711.8 1591.25   4
   0  -7  10 42223.1 2143.87   2
   0  -7  13 1321.50 468.767   2
  -7   0 -13 1355.14 469.518   4
   0   7 -13 1005.41 1008.81   4
   0  -7  13 1886.18 881.574   1
   0  -7  16 68285.2 2385.55   2
   0   7 -16 60904.4 4228.83   4
  -7   0 -16 72124.1 3058.49   4
   0  -7  16 65877.5 3615.91   1
  -7   7  16 70582.8 2277.78   3
   0   7 -19 126530. 6366.69   4
  -7   0 -19 121596. 4681.25   4
   0  -7  19 118492. 5260.91   1
   0   7 -22 186647. 8169.80   4
  -7   0 -22 164132. 6081.28   4
   0  -7  22 178687. 7132.21   1
   0   7 -25 74761.4 5189.79   4
   0  -7  25 64744.5 4362.32   1
   0  -7  28 62873.6 4594.65   1
   0   7 -28 71031.9 5182.79   4
  -4   8   0 29022.6 1609.86   4
   4  -8   0 30264.0 1776.38   2
  -4  -4   0 30122.3 1955.68   3
  -8   4   0 30095.7 1024.59   1
   4   4   0 30891.6 1433.87   4
  -8   4  -3 469.222 227.824   1
   4  -8  -3 439.157 543.269   2
  -4  -4  -3 1548.59 594.615   3
  -4   8  -3 136.908 464.051   4
   4  -8   3 584.085 433.983   2
  -4  -4   3 671.145 612.033   3
   8  -4   3 819.172 277.556   1
  -4   8  -6 81291.0 3406.34   4
   8  -4   6 79233.2 2604.39   1
  -8   4  -6 81477.4 2745.17   4
  -4  -4   6 78355.1 3413.99   3
   4  -8  -6 73880.6 3030.82   2
  -4  -4  -6 73035.2 3080.59   3
   4  -8   6 76401.1 2866.53   2
   4  -8  -9 642.381 511.822   2
  -4  -4  -9-128.439 464.480   3
  -4  -4   9 1223.39 648.627   3
  -4  -4  -9 457.905 147.434   4
  -4   8  -9-163.449 786.454   4
   4  -8   9 249.243 577.316   1
   4  -8   9 611.504 398.071   2
   8  -4   9 638.426 445.281   1
  -8   4  -9 600.291 430.194   4
  -4   8  12 2336.30 456.920   3
  -4  -4  12 3599.26 878.958   3
  -4  -4 -12 2872.84 640.968   3
  -8   4  12 2148.53 445.439   1
  -4  -4  12 2151.00 728.111   1
   8  -4  12 2826.67 774.688   1
  -4   8 -12 2313.05 1092.60   4
  -8   4 -12 1893.29 673.253   4
  -4  -4 -12 2010.58 443.638   4
  -8   4  12 2470.70 529.382   3
   4  -8  12 1111.31 675.909   1
   4  -8  12 2323.67 515.744   2
   4  -8 -12 1881.04 582.826   2
   4  -8  15 391.513 733.176   1
   8  -4  15 396.060 662.667   1
  -4  -4 -15 375.298 372.791   3
   4  -8 -15 962.654 499.293   2
  -8   4 -15 761.068 698.067   4
  -4  -4  15 777.269 673.016   1
  -4  -4 -15-196.800 417.606   4
  -4   8 -15-1731.62 1378.55   4
   4  -8  15 524.472 324.604   2
  -8   4  15-104.442 377.127   1
  -8   4  15 265.455 430.854   3
  -4  -4  15 1256.54 735.776   3
  -8   4 -18 6347.92 1142.11   4
   4  -8  18 8457.43 1512.80   1
  -8   4  18 5906.27 850.514   3
   8  -4  18 7794.18 1302.58   1
  -4  -4  18 6149.53 1130.01   1
   4  -8 -18 7025.98 903.566   2
  -4   8 -18 6240.15 1528.78   4
  -4  -4 -18 5498.69 935.659   4
  -4  -4  18 7638.50 1224.80   3
  -8   4  18 5464.84 838.438   1
  -8   4 -21 3796.95 1288.71   4
   4  -8  21 4412.46 1154.71   1
  -4  -4  21 6020.67 1292.66   1
  -4   8 -21 2061.76 1229.15   4
   4   4 -21 7543.59 1818.15   4
   8  -4  21 4232.37 1213.40   1
  -4   8 -24-1029.28 1647.28   4
   8  -4  24 2730.22 1340.88   1
  -8   4 -24 1878.40 1129.05   4
  -4  -4  24 2399.07 1225.06   1
   4   4 -24 2991.44 1585.56   4
   4  -8  24-283.730 1141.42   1
   4   4 -27 1849.87 1188.21   4
   4  -8  27-1482.89 1470.46   1
  -4  -4  27 674.407 1167.35   1
  -8   4 -27 1736.84 1127.24   4
  -4   8 -27-903.827 1669.63   4
   8  -4  27 1335.95 1412.43   1
  -4  -4  30 24.7260 1174.89   1
   4   4 -30 805.253 1391.26   4
   8  -4  30 1116.18 1257.81   1
  -4   8 -30-635.834 1233.90   4
   4  -8  30-974.911 1376.25   1
  -5  -3  31 44148.8 3876.87   1
   8  -5  28 31592.3 3040.70   1
   5   3 -28 31384.0 3560.07   4
  -5  -3  28 28279.1 2857.88   1
   5  -8  28 32079.1 3283.90   1
  -5   8 -28 31923.0 3547.72   4
  -8   5 -28 30128.1 3021.64   4
  -8   5 -25 41919.7 3411.95   4
   8  -5  25 46340.2 3424.26   1
  -8   3  25 44897.5 2963.70   1
   5   3 -25 46141.4 3920.47   4
   5  -8  25 42931.0 3514.43   1
  -5   8 -25 43593.2 3938.46   4
  -5  -3  25 44393.6 3367.03   1
   8  -5  22 70925.6 3917.10   1
   5   3 -22 70997.7 4591.84   4
  -5   8 -22 67190.2 4670.03   4
  -8   3  22 65479.0 3339.21   1
  -8   5 -22 59994.4 3949.82   4
   5  -8  22 63810.0 4039.59   1
  -5  -3  22 66571.4 3868.07   1
  -8   3  19 51188.7 2659.01   1
   8  -5  19 54893.6 3214.03   1
  -8   5 -19 58371.8 3586.33   4
  -3  -5 -19 55893.0 2798.07   4
  -3  -5 -19 52871.4 2683.06   2
  -5  -3  19 53997.8 3098.71   3
  -5  -3  19 48043.5 3040.45   1
  -8   3  19 58884.2 2737.65   3
   5  -8  19 48221.7 3239.86   1
  -5   8 -19 54342.6 4005.72   4
   3  -8 -19 53552.0 2406.29   2
   8  -5  16 53051.1 2932.03   1
  -8   3  16 57992.6 2713.25   3
  -5  -3  16 57103.1 3015.01   1
  -5   8 -16 60064.4 3906.47   4
  -8   5 -16 56985.3 3247.62   4
  -3  -5 -16 55571.1 2154.64   3
   3  -8 -16 58201.4 2589.78   2
  -3  -5 -16 61554.3 2656.92   4
   5  -8  16 56155.3 3266.98   1
  -5  -3  16 52855.9 3020.89   3
  -8   3  16 59105.2 2528.38   1
   5  -8  13 12465.0 1477.64   1
  -3  -5 -13 15079.2 1171.36   3
   5  -8  13 12595.4 968.146   2
  -5   8 -13 14487.1 1894.67   4
  -3  -5 -13 16697.5 1173.51   4
  -5  -3  13 16134.4 1478.36   1
  -8   3  13 14197.3 1268.87   3
   3  -8 -13 13902.6 1236.99   2
  -8   3  13 14271.7 1031.09   1
  -8   5 -13 16936.6 1605.02   4
   8  -5  13 14179.6 1385.38   1
  -3   8  13 13114.0 905.106   3
  -5  -3  13 14526.8 1539.84   3
  -8   3  10 4811.56 512.645   1
   3  -8 -10 3955.93 744.341   2
  -3   8  10 5341.11 698.033   3
  -5  -3  10 5767.40 1022.42   3
  -3  -5 -10 6294.78 850.788   3
   8  -5  10 6404.17 834.580   1
  -8   5 -10 6329.72 879.364   4
  -8   3  10 5671.89 788.388   3
   5  -8  10 5585.65 701.177   2
  -5   8 -10 5537.92 1154.25   4
   5  -8  10 4755.26 922.968   1
  -5  -3  10 5382.81 796.681   1
   5  -8   7 38761.3 2113.29   1
   5  -8   7 39827.6 1868.91   2
   3  -8  -7 37529.4 2152.14   2
   8  -5   7 37209.6 1751.29   1
  -8   5  -7 35646.3 1812.55   4
  -3  -5  -7 36933.5 2060.36   3
  -5  -3   7 34326.0 2168.97   3
  -8   3   7 33448.8 1045.82   1
  -5   8  -4 64391.8 2753.41   4
  -5  -3   4 66194.3 2970.04   3
   3  -8  -4 60121.0 2822.01   2
  -3  -5  -4 60050.0 2807.09   3
   8  -5   4 60589.5 2081.06   1
   5  -8   1 118284. 3834.37   2
   3   5   1 113916. 3031.38   4
  -8   3   1 117380. 2624.41   1
   3  -8  -1 113669. 4011.70   2
   8  -5   1 113595. 2824.37   1
  -3   8   1 113425. 3545.56   4
  -3  -5  -1 110420. 4157.69   3
  -5   8  -1 114707. 3745.05   4
  -5  -3   1 109358. 4057.48   3
  -3   8  -2 20323.2 1426.26   4
   3  -8   2 19040.5 1506.18   2
   3   5  -2 21581.6 1388.24   4
  -3  -5   2 17081.3 1554.29   3
   5  -8  -2 20326.5 1435.39   2
  -5  -3  -2 18681.7 1459.93   3
  -8   3  -2 21509.3 1005.29   1
   5  -8  -5 191020. 5532.58   2
   3  -8   5 188046. 5466.55   2
   3   5  -5 187311. 6044.24   4
  -3  -5   5 196857. 6184.86   3
   8  -3   5 204108. 4864.14   1
  -5  -3  -5 189920. 5570.95   3
  -3   8  -5 187690. 5780.19   4
  -3   8  -8 436804. 11297.9   4
  -8   3  -8 436670. 9622.08   4
   8  -3   8 459735. 9913.16   1
   8  -5  -8 412770. 8641.79   1
   3  -8   8 432890. 9948.94   2
  -3  -5   8 451334. 11149.9   3
   5  -8  -8 430861. 10198.0   2
   3   5  -8 437643. 11479.7   4
  -5  -3  -8 426220. 10171.1   3
  -5  -3 -11 188215. 4298.68   4
  -3  -5  11 173118. 5966.70   3
   3   5 -11 172214. 6599.46   4
  -3   8 -11 185775. 6798.14   4
   8  -3  11 181795. 5342.10   1
   3  -8  11 191734. 6065.46   1
   5  -8 -11 179766. 5242.30   2
   8  -5 -11 162968. 4349.58   1
   3  -8  11 178978. 4886.98   2
  -3  -5  11 181413. 5791.14   1
  -8   3 -11 183512. 5177.01   4
  -5  -3 -11 186957. 5245.43   3
  -5   8  14 113207. 3258.60   3
  -5  -3 -14 114043. 3630.51   4
  -8   3 -14 124414. 4321.27   4
  -3  -5  14 112203. 4538.82   1
   8  -3  14 112526. 4250.65   1
   5  -8 -14 118550. 3890.81   2
  -3   8 -14 115475. 5587.48   4
  -3  -5  14 108332. 4561.84   3
  -5  -3 -14 117689. 3802.43   3
   3  -8  14 114291. 3423.83   2
   3  -8  14 110395. 4677.03   1
  -8   5  14 117238. 3649.89   3
  -3  -5  17 45464.2 2816.81   3
   8  -3  17 43771.5 2680.38   1
  -3  -5  17 42129.0 2749.38   1
  -8   3 -17 45506.5 2797.18   4
  -3   8 -17 36275.5 3245.06   4
  -5  -3 -17 40246.0 2221.67   4
   3  -8  17 41056.6 2859.20   1
  -5  -3 -17 48855.5 2084.46   3
  -8   5  17 48177.7 2207.74   3
   5  -8 -17 44701.9 2138.15   2
   3   5 -17 49783.2 3669.44   4
   3  -8  20 35800.1 2874.79   1
   3   5 -20 37035.5 3346.85   4
  -3  -5  20 33496.4 2662.07   1
  -5  -3 -20 29945.1 2096.61   4
  -8   3 -20 27219.8 2431.67   4
   8  -3  20 33052.4 2523.50   1
  -3   8 -20 26189.3 2965.32   4
   5  -8 -20 34135.8 1790.82   2
   3  -8  23 21565.2 2546.60   1
   8  -3  23 23276.6 2306.36   1
  -3  -5  23 20836.6 2326.30   1
  -8   3 -23 16739.1 1964.66   4
  -3   8 -23 20920.0 2843.14   4
   3   5 -26 50619.2 4230.25   4
   8  -3  26 39885.0 3229.94   1
  -8   3 -26 35381.1 2977.90   4
  -3   8 -26 39359.5 3848.80   4
  -3  -5  26 42061.7 3508.41   1
   3  -8  26 42193.8 3622.31   1
  -3  -5  29 4646.95 1592.00   1
  -3   8 -29 6748.87 1944.97   4
   3   5 -29 8970.71 2065.78   4
   3  -8  29 6046.34 1611.73   1
   6  -8  29 44785.0 3951.84   1
  -6  -2  29 41549.6 3440.94   1
  -6   8 -29 42805.4 4052.65   4
  -8   6 -29 40774.4 3674.52   4
   6   2 -29 44515.8 4164.53   4
   8  -6  29 47461.8 3847.81   1
   8  -6  26 4025.42 1433.40   1
  -6  -2  26 5829.09 1379.50   1
  -6   8 -26 6229.74 1727.79   4
   6  -8  26 5144.90 1589.59   1
   6   2 -26 7332.90 1854.22   4
  -8   6 -26 5000.48 1427.16   4
  -8   6 -23 677.197 942.270   4
  -6   8 -23-93.1570 1237.78   4
  -8   2  23 797.513 748.454   1
   8  -6  23-181.676 894.668   1
  -6  -2  23 1916.67 984.068   1
   6  -8  23 302.684 1154.45   1
  -8   2  20 13232.9 1393.02   1
  -2  -6 -20 13731.8 1394.57   4
  -8   6 -20 12089.3 1845.96   4
  -6  -2  20 15969.0 1779.84   1
   2  -8 -20 14562.9 1228.75   2
   6  -8  20 15406.6 1909.51   1
   8  -6  20 13742.2 1754.84   1
  -6  -2  20 17737.6 1768.12   3
  -6   8 -20 13862.7 2190.62   4
  -2  -6 -20 14246.2 1368.67   2
  -8   2  17 3141.34 706.886   1
  -8   2  17 3560.80 776.177   3
   8  -6  17 3068.43 897.674   1
  -2  -6 -17 2072.02 619.540   2
   2  -8 -17 3860.52 711.876   2
   6  -8  17 3831.69 1103.88   1
  -6  -2  17 3226.41 884.334   3
  -6   8 -17 3626.13 1310.50   4
  -6  -2  17 4398.29 975.660   1
  -8   6 -17 2920.98 994.977   4
  -2  -6 -14 7823.76 821.945   3
  -6  -2  14 5626.19 952.842   3
  -8   6 -14 7712.18 1299.85   4
  -2  -6 -14 4730.62 857.694   2
   8  -6  14 6043.52 1002.72   1
   6  -8  14 6600.04 1183.33   1
  -6   8 -14 5672.62 1266.17   4
  -2   8  14 6668.90 592.475   3
  -8   2  14 5816.60 909.160   3
  -8   2  14 8113.16 860.947   1
   2  -8 -14 6777.07 980.367   2
  -6  -2  14 9072.09 1117.36   1
  -6  -2  11 22240.7 1558.09   1
  -6   8 -11 24057.7 2033.87   4
  -8   2  11 22462.8 1208.42   1
  -2  -6 -11 23045.4 1545.62   3
   2  -8 -11 21888.6 1696.74   2
   8  -6  11 23683.8 1660.86   1
  -8   6 -11 25309.9 1853.33   4
  -8   2  11 21153.3 1510.39   3
  -6  -2  11 22999.0 1773.18   3
  -2   8  11 20500.4 1279.99   3
   6  -8  11 21570.1 1738.50   1
  -8   2   8 166440. 4912.86   3
   6  -8   8 176100. 5219.36   1
  -2  -6  -8 171601. 3736.99   4
   8  -6   8 167123. 4829.43   1
  -8   2   8 166208. 3952.48   1
   6  -8   8 164703. 4678.04   2
  -2  -6  -8 169231. 5233.61   3
   2  -8  -8 165227. 5449.39   2
  -6  -2   8 162200. 5375.98   3
  -6   8  -8 162114. 5516.50   4
  -8   6  -8 160672. 5074.61   4
   6  -8   5 469568. 10691.5   1
   2  -8  -5 456187. 11329.4   2
   6  -8   5 460187. 10470.2   2
  -6   8  -5 461140. 10925.6   4
  -8   2   5 454041. 9228.09   1
  -2  -6  -5 435509. 11086.4   3
   8  -6   5 449616. 10037.4   1
  -6  -2   5 467858. 11168.8   3
  -8   6  -5 464207. 10504.7   4
  -2  -6  -5 463960. 9236.61   4
   6  -8   2 150611. 4517.34   2
  -6   8  -2 155774. 4579.94   4
   2   6   2 148554. 3614.21   4
  -2  -6  -2 149866. 3915.94   4
  -2  -6  -2 151497. 5125.02   3
   2  -8  -2 143311. 5016.97   2
   8  -6   2 147555. 3719.65   1
  -6  -2   2 157127. 4884.56   3
   2   6  -1 52878.4 2158.08   4
  -8   2  -1 51432.3 1641.81   1
   8  -6  -1 50911.0 1490.14   1
   6  -8  -1 57544.8 2459.27   2
   2  -8   1 52452.9 2635.28   2
  -6  -2  -1 53289.1 2499.27   3
  -2  -6   1 52345.7 2786.01   3
  -2   8  -1 54527.7 2309.54   4
   6  -8  -4 126157. 4036.83   2
   2  -8   4 125737. 4276.08   2
  -6  -2  -4 122496. 4055.90   3
   2   6  -4 124238. 4286.94   4
   6   2   4 121039. 2694.27   4
  -2   8  -4 122773. 4187.04   4
  -2  -6   4 118937. 4622.38   3
   2   6  -7 194159. 6449.10   4
  -2  -6   7 190352. 6356.80   3
   2  -8   7 194731. 5610.18   2
   8  -6  -7 199048. 4236.71   1
  -6  -2  -7 187145. 5465.96   3
   6  -8  -7 198850. 5546.64   2
  -2   8  -7 192807. 6244.68   4
  -8   2  -7 195648. 4841.88   4
   2  -8  10 130519. 3970.20   2
   2   6 -10 120358. 5266.33   4
  -6  -2 -10 111704. 2930.86   4
  -2   8 -10 129173. 5332.11   4
  -2  -6  10 123831. 4816.28   3
   8  -6 -10 126826. 3213.18   1
  -8   2 -10 120504. 3636.01   4
   6  -8 -10 126328. 4044.91   2
   2  -8  10 130855. 4769.43   1
  -6  -2 -10 123144. 3968.79   3
   8  -2  13 84398.3 3543.13   1
   2  -8  13 93641.0 3079.56   2
  -2  -6  13 87693.9 3931.82   1
  -6  -2 -13 94917.6 2941.11   4
  -2   8 -13 90010.4 4833.96   4
   2   6 -13 93422.3 4807.15   4
   2  -8  13 89587.6 4054.52   1
  -2  -6  13 89293.8 4065.08   3
   6  -8 -13 91927.3 3322.19   2
  -8   2 -13 95424.0 3419.02   4
  -6  -2 -13 94442.4 3312.52   3
  -8   6  16 17091.1 1211.36   3
   6  -8 -16 18683.7 1347.16   2
   2  -8  16 16329.3 1083.29   2
  -6  -2 -16 18144.0 1366.22   4
  -2   8 -16 16838.5 2206.78   4
   2   6 -16 19442.7 2371.11   4
  -2  -6  16 18441.5 1266.52   2
   8  -2  16 16204.4 1636.26   1
  -2  -6  16 16145.2 1752.16   1
  -6  -2 -16 17975.6 1319.51   3
   2  -8  16 17205.0 1819.13   1
  -8   2 -16 19510.9 1656.04   4
  -8   2 -19 11853.6 1432.93   4
   8  -2  19 14849.2 1740.15   1
  -2  -6  19 15993.3 1886.94   1
  -2   8 -19 9183.48 1723.50   4
   6  -8 -19 11467.5 1050.06   2
   2  -8  19 13637.8 1855.80   1
  -6  -2 -19 10872.3 1214.95   4
   2   6 -19 15132.4 2258.23   4
   2  -8  22 1318.24 1288.90   1
   2   6 -22 1779.45 1176.54   4
  -2  -6  22 1379.27 1058.73   1
  -2   8 -22-954.985 1501.52   4
  -8   2 -22 2103.99 797.305   4
   2   6 -25 1553.22 1608.29   4
  -2  -6  25 1368.69 1157.38   1
  -2   8 -25 2285.35 1234.88   4
   2  -8  25 2187.10 1132.69   1
   2   6 -28-1296.13 1429.85   4
  -2   8 -28 198.564 1342.99   4
  -2  -6  28 493.168 1099.59   1
   2  -8  28 172.774 1332.43   1
  -2  -6  31 393.919 1270.69   1
  -8   7 -30-1083.29 1326.71   4
  -7   8 -30 16.4351 1381.41   4
   8  -7  27 7453.02 1886.05   1
   7  -8  27 6346.40 1687.68   1
  -7  -1  27 3439.01 1097.11   1
   7   1 -27 6520.18 1914.86   4
  -7   8 -27 5789.97 1767.52   4
  -8   7 -27 3490.04 1475.75   4
   8  -7  24 1453.97 1059.33   1
  -8   1  24 680.877 719.538   1
  -7   8 -24 1557.55 1174.75   4
   7  -8  24 496.253 1119.08   1
  -7  -1  24-375.998 927.547   1
  -8   7 -24 380.556 1234.22   4
   8  -7  21-31.5371 1012.70   1
  -7   8 -21 318.387 1115.53   4
  -8   7 -21 2520.63 1214.93   4
  -8   1  21 2708.25 726.463   1
  -7  -1  21 1491.34 842.382   1
   7  -8  21 574.549 1016.92   1
  -7  -1  18 14277.1 1567.92   3
  -8   1  18 10781.8 1221.10   1
  -1  -7 -18 10405.9 1203.56   2
  -8   7 -18 13621.7 1971.96   4
  -8   1  18 12679.6 1429.69   3
  -7   8 -18 11308.7 1897.42   4
   8  -7  18 10562.9 1545.68   1
  -7  -1  18 12181.2 1433.11   1
   1  -8 -18 10908.0 1136.09   2
   7  -8  18 11480.9 1637.06   1
  -7  -1  15 12469.7 1419.06   3
  -7   8 -15 16678.1 1977.63   4
  -1  -7 -15 14956.1 1485.78   2
  -8   7 -15 13826.0 1758.70   4
  -8   1  15 16884.2 1533.81   3
  -7  -1  15 17655.3 1519.19   1
   7  -8  15 16057.7 1713.43   1
   1  -8 -15 16609.1 1523.93   2
   8  -7  15 15491.6 1618.33   1
  -8   1  15 14951.0 1275.81   1
   1  -8 -12 3150.62 765.912   2
  -7   8 -12 2917.14 1037.03   4
  -7  -1  12 1951.70 699.604   3
  -8   1  12 2740.97 711.341   3
  -1   8  12 2565.63 516.075   3
  -1  -7 -12 2240.83 724.188   2
  -8   7 -12 3030.09 933.513   4
  -8   1  12 2852.07 570.911   1
  -1  -7 -12 2503.60 557.197   3
  -7  -1  12 2871.53 631.627   1
   7  -8  12 1713.83 726.584   1
   8  -7  12 2425.76 803.540   1
  -1  -7  -9 7107.31 886.164   3
  -7  -1   9 7544.88 1060.50   3
  -8   7  -9 5529.67 927.239   4
  -7   8  -9 8357.65 1235.01   4
   8  -7   9 6983.67 924.022   1
  -7  -1   9 7022.61 804.947   1
  -8   1   9 6802.68 928.708   3
  -8   1   9 7717.93 667.214   1
   7  -8   9 6261.01 930.123   1
   8  -7   6 19297.2 1275.86   1
  -8   7  -6 21305.5 1528.48   4
  -1  -7  -6 19913.0 1634.42   3
  -7  -1   6 18703.5 1576.68   3
  -1  -7  -6 20545.4 913.957   4
   7  -8   6 17381.0 1342.06   1
   7  -8   6 19735.1 1353.59   2
   1  -8  -6 22438.6 1876.20   2
  -7   8  -6 19384.9 1513.46   4
  -8   1   6 20664.3 1478.85   3
  -1  -7  -3 2203.31 765.554   3
  -7  -1   3 2313.99 671.580   3
   7  -8   3 1593.39 405.474   1
   1  -8  -3 1371.48 732.411   2
  -1  -7  -3 1851.63 340.630   4
  -7   8  -3 3572.32 751.570   4
   7  -8   3 2045.47 588.571   2
   8  -7   3 2289.76 428.731   1
  -1  -7   0 4317.48 977.070   3
   1  -8   0 4734.54 934.075   2
  -7  -1   0 5630.21 851.970   3
   1   7   0 5318.70 638.958   4
   8  -7   0 6519.55 553.536   1
   7  -8   0 5517.07 806.015   2
  -1   8   0 4752.27 692.234   4
   7   1   3 1820.81 299.199   4
   8  -1   3 1467.90 332.864   4
  -7  -1  -3 2242.58 602.696   3
  -1   8  -3 2191.05 626.303   4
   1   7  -3 3039.26 676.829   4
   1  -8   3 1538.35 632.615   2
  -1  -7   3 1217.91 764.947   3
   7  -8  -3 1958.78 643.801   2
   7   1   6 46931.6 1592.67   4
   1  -8   6 49543.3 2517.60   2
  -1  -7   6 47548.6 2806.78   3
   7  -8  -6 46516.2 2268.31   2
  -1   8  -6 45919.2 2638.53   4
   1   7  -6 48351.8 2706.47   4
   8  -1   6 44519.8 1856.58   4
  -1  -7   9 2581.31 959.582   3
   1  -8   9 2577.30 728.739   2
   8  -7  -9 3664.72 416.708   1
  -8   1  -9 3989.51 516.583   4
   1   7  -9 3948.85 1072.53   4
  -7  -1  -9 4414.85 398.324   4
   7  -8  -9 4611.37 770.840   2
  -1   8  -9 4270.93 1045.33   4
   1  -8  12 2761.91 891.429   1
  -1  -7  12 4122.86 1024.35   3
  -1   8 -12 4650.05 1296.09   4
  -8   1 -12 2878.82 524.106   4
  -1  -7  12 2317.01 569.482   2
   7  -8 -12 3412.75 710.133   2
  -1  -7  12 2830.29 907.348   1
  -7  -1 -12 2411.13 441.149   4
   1  -8  12 3362.34 647.383   2
   1   7 -12 3551.20 1200.11   4
  -7  -1 -15 776.568 427.932   4
   1  -8  15 903.525 386.034   2
  -1  -7  15 1356.42 849.745   1
  -1   8 -15-1068.56 1192.49   4
   7  -8 -15 1449.92 564.333   2
  -8   1 -15 1351.22 615.944   4
   1   7 -15 1422.21 1143.42   4
  -7  -1 -15 1252.54 513.254   3
   1  -8  15-545.702 920.202   1
  -1  -7  15 876.370 486.863   2
  -7  -1 -18 524.245 525.224   4
  -7  -1 -18 111.663 391.098   3
   1   7 -18 615.297 1196.20   4
  -1  -7  18 315.920 803.043   1
   1  -8  18 1063.61 962.590   1
  -1   8 -18-2479.74 1678.16   4
  -8   1 -18 432.291 508.579   4
  -1  -7  21 1282.66 992.480   1
  -8   1 -21-514.416 747.468   4
  -1   8 -21-295.986 1463.12   4
   1   7 -21-1469.78 1538.07   4
   1  -8  21 597.766 924.172   1
  -1  -7  24-560.943 1174.24   1
   1  -8  24 729.732 1061.12   1
   1   7 -24 2064.29 1608.53   4
  -1   8 -24-156.859 1518.38   4
  -1   8 -27-649.626 1504.19   4
   1   7 -27-1952.99 1751.34   4
  -1  -7  27 937.686 1073.96   1
   1  -8  27 771.946 1194.40   1
  -1  -7  30-2093.71 1636.94   1
   1  -8  30-519.027 1270.43   1
  -8   8 -31 44588.5 4041.76   4
   8  -8  28 25168.1 2957.73   1
  -8   8 -28 22502.2 3031.58   4
   8  -8  25 11965.4 2004.51   1
  -8   8 -25 10833.9 2050.66   4
  -8   0  25 13330.4 1773.94   1
   8  -8  22 16070.9 2153.22   1
  -8   8 -22 14854.3 2345.55   4
  -8   0  22 17641.8 1796.65   1
   0  -8 -19 92966.6 3795.36   2
  -8   8 -19 96139.6 5175.04   4
  -8   0  19 97970.0 4300.72   3
   8  -8  19 91442.3 4509.83   1
  -8   0  19 94217.7 4031.06   1
  -8   0  16 317911. 9079.68   3
   0  -8 -16 323882. 8896.20   2
  -8   8 -16 332052. 10307.4   4
  -8   0  16 329337. 8576.59   1
   8  -8  16 325811. 9423.61   1
  -8   0  13 335909. 8978.61   3
  -8   8 -13 326812. 9553.71   4
   8  -8  13 324557. 8960.92   1
   0  -8 -13 329080. 9134.69   2
  -8   0  13 316134. 8035.88   1
  -8   8 -10 15434.3 1576.94   4
   8  -8  10 19002.7 1527.69   1
   0  -8 -10 16985.3 1714.83   2
  -8   0  10 20219.5 1269.55   1
  -8   0  10 17762.7 1583.17   3
   0  -8  -7 44151.5 2764.40   2
  -8   0   7 45851.5 2412.08   3
   8  -8   7 40767.2 2093.79   1
  -8   8  -7 45664.9 2474.37   4
   0  -8  -7 48479.1 2534.54   3
   8  -8   4 68581.5 2565.43   1
   0  -8  -4 67133.9 3230.96   3
  -8   0   4 70876.8 2964.31   3
   0  -8  -4 73245.5 3648.82   2
  -8   8  -4 67963.8 2895.11   4
   0  -8  -1 2206.89 795.826   3
   8  -8   1 3817.20 722.272   2
  -8   0   1 3055.64 758.075   3
   8  -8   1 4218.69 556.821   1
   0   8   1 3077.15 563.270   4
   8  -8  -2 61222.7 2637.05   2
   0  -8   2 62537.8 3269.86   3
   0   8  -2 62300.0 2628.81   4
   0   8  -5 43191.1 2481.93   4
   0  -8   5 45615.1 2797.00   3
   0  -8   5 45808.3 2610.28   2
   8   0   5 41187.9 1605.84   4
   8  -8  -5 45824.0 2215.41   2
   0  -8   8 72905.6 3202.66   2
   8  -8  -8 66866.8 2804.47   2
   0  -8   8 64738.8 3454.53   3
   0   8  -8 66464.6 3541.99   4
   8   0   8 68851.2 2491.38   4
   8  -8 -11 240348. 6603.91   2
   0   8 -11 249464. 8418.13   4
  -8   0 -11 246522. 5788.19   4
   0  -8  11 250787. 6862.92   2
   0  -8  11 254593. 7671.42   1
  -8   0 -14 70755.6 2612.84   4
   0  -8  14 70650.2 2796.67   2
   0  -8  14 69673.5 3647.80   1
   0   8 -14 64156.7 4167.68   4
  -8   0 -17 47785.3 2416.52   4
   0  -8  17 50978.9 3270.20   1
   0   8 -17 47969.4 3819.26   4
   0  -8  17 53166.9 2154.93   2
   0   8 -20 75771.9 5018.87   4
   0  -8  20 69409.6 4080.14   1
  -8   0 -20 72901.3 3390.38   4
   0  -8  23 33124.6 3047.95   1
   0   8 -23 30482.8 3323.99   4
   0  -8  26 61862.6 4470.49   1
   0   8 -26 74359.7 5325.99   4
   0   8 -29 78766.2 5599.04   4
   0  -8  29 63487.2 4869.25   1
   9  -5  29 39231.7 3549.24   1
   5   4 -29 41976.6 4011.65   4
  -5   9 -29 40074.0 4112.02   4
   5  -9  29 40191.0 3850.14   1
  -5  -4  29 39780.4 3550.14   1
   9  -5  26 3454.15 1487.25   1
   5  -9  26 4564.39 1445.95   1
  -5  -4  26 3608.39 1343.00   1
  -5   9 -26 4107.46 1803.25   4
   5   4 -26 2593.91 1332.12   4
  -9   5 -26 2622.97 1199.05   4
   9  -5  23 3413.85 1132.65   1
  -5  -4  23 2352.33 1092.17   1
  -5   9 -23 5489.06 1821.89   4
   5  -9  23 2552.21 1208.04   1
   5   4 -23 2892.10 1518.90   4
  -9   5 -23 2677.43 1055.43   4
  -5  -4  20 1886.77 877.910   3
  -4  -5 -20 650.742 579.630   2
   4  -9 -20 1788.67 582.350   2
  -9   5 -20 358.448 978.060   4
   5  -9  20-1343.80 1211.72   1
  -5   9 -20 459.984 1270.30   4
   5   4 -20 2360.38 1347.08   4
  -9   4  20 1786.77 655.130   1
  -5  -4  20-59.6756 871.577   1
   9  -5  20 827.178 918.432   1
  -5  -4  17 2834.77 984.017   1
  -5  -4  17 5637.99 1178.10   3
  -4  -5 -17 3365.29 651.724   4
  -9   4  17 1422.37 520.839   1
   5  -9  17 3415.02 1060.48   1
  -9   4  17 2226.11 623.989   3
   9  -5  17 3724.34 1066.46   1
  -5   9 -17 3138.52 1215.17   4
   4  -9 -17 4252.42 826.180   2
  -9   5 -17 5735.91 1241.56   4
  -4  -5 -14 10427.6 1066.95   3
  -5  -4  14 9373.79 1355.25   3
   5  -9  14 5600.99 1205.10   1
  -9   4  14 7176.50 781.962   1
  -4  -5 -14 8791.89 832.162   4
  -9   5 -14 11624.7 1364.59   4
  -9   4  14 8337.81 985.615   3
  -5   9 -14 6055.52 1477.20   4
   5  -9  14 8246.10 844.513   2
   9  -5  14 8811.63 1206.27   1
  -5  -4  14 8832.67 1234.25   1
   4  -9 -14 8029.80 1033.79   2
  -5  -4  11 28481.2 1973.13   1
  -5  -4  11 31883.7 2275.13   3
   5  -9  11 29963.1 1658.37   2
   4  -9 -11 29370.1 1910.18   2
  -5   9 -11 32916.2 2582.46   4
   5  -9  11 30710.5 2185.36   1
  -4  -5 -11 31556.9 1172.51   4
   9  -5  11 28876.4 1856.99   1
  -9   4  11 29450.8 1247.75   1
  -4  -5 -11 32024.8 1932.40   3
  -9   5 -11 29313.0 1887.60   4
  -9   4  11 29359.3 1725.16   3
   9  -5   8 217631. 5887.14   1
  -9   5  -8 222564. 6011.84   4
  -5   9  -8 224776. 7006.58   4
   5  -9   8 231006. 6125.33   2
   5  -9   8 234291. 6760.30   1
  -4  -5  -8 220454. 6521.50   3
  -5  -4   8 235427. 7053.84   3
   4  -9  -8 228186. 6569.34   2
  -5  -4   5 127015. 4742.80   3
   9  -5   5 126966. 3598.70   1
  -4  -5  -5 124574. 4558.02   3
   4  -9  -5 126412. 4493.83   2
  -5   9  -5 132688. 4564.09   4
   5  -9   5 134239. 4239.78   2
   4   5   2 223402. 4969.16   4
  -5   9  -2 221767. 6213.91   4
   9  -5   2 232628. 5126.27   1
  -9   5  -2 230506. 5280.56   1
  -5  -4   2 234993. 6878.75   3
   4  -9  -2 218469. 6564.90   2
   5  -9   2 224735. 6331.10   2
  -4  -5  -2 230073. 6814.09   3
   5   4   1 78907.9 2454.05   4
  -4   9  -1 83789.3 3117.29   4
  -5  -4  -1 79125.4 3460.56   3
   4   5  -1 84705.3 2898.15   4
   5  -9  -1 80685.0 3255.51   2
   4  -9   1 76795.8 3223.08   2
  -9   4  -1 77773.5 2210.20   1
  -4  -5   1 82985.2 3603.59   3
   9  -4   4 227143. 5324.91   1
   4   5  -4 227776. 6561.34   4
  -4   9  -4 227716. 6467.82   4
   4  -9   4 220840. 6245.21   2
  -4  -5   4 215104. 6858.01   3
   5  -9  -4 221761. 6364.52   2
  -5  -4  -4 219977. 6532.81   3
  -9   4  -7 35540.8 1720.07   4
   9  -4   7 33292.3 1688.62   1
   4   5  -7 35775.5 2438.26   4
   4  -9   7 35776.8 1955.79   2
  -4  -5   7 34881.1 2342.85   3
   5  -9  -7 34391.0 2069.15   2
  -4   9  -7 33799.7 2332.95   4
  -5  -4  -7 35231.2 2096.54   3
   5  -9 -10 248217. 6770.49   2
   9  -4  10 233860. 6414.69   1
   4  -9  10 249870. 7331.55   1
   4   5 -10 237672. 7894.70   4
  -4   9 -10 242935. 7937.95   4
   4  -9  10 236441. 6315.71   2
  -4  -5  10 241987. 7472.59   3
  -5  -4 -10 238407. 6718.94   3
  -9   4 -10 235953. 6325.54   4
  -4   9 -13 107332. 5249.45   4
  -4  -5  13 99042.6 4162.48   1
  -9   5  13 99501.4 3472.84   3
   9  -4  13 99546.5 3841.90   1
  -4  -5  13 95620.6 4369.54   3
   4  -9  13 100978. 4376.68   1
  -5  -4 -13 106068. 2949.43   4
   5  -9 -13 104615. 3788.18   2
  -5  -4 -13 108442. 3811.80   3
   4  -9  13 103030. 3392.67   2
  -5   9  13 99516.9 3286.69   3
   4   5 -13 106847. 5091.55   4
  -9   4 -13 94962.0 3782.25   4
  -4  -5  16 36731.8 2592.65   1
  -9   4 -16 43305.3 2577.66   4
   9  -4  16 38661.4 2471.93   1
  -4   9 -16 36979.7 3282.35   4
   4  -9  16 40613.1 1807.37   2
   5  -9 -16 40857.5 2187.86   2
   4  -9  16 40882.2 2869.18   1
  -4  -5  16 40020.4 2731.60   3
   4   5 -16 39308.8 3247.93   4
  -5  -4 -16 42566.3 2115.99   3
  -5  -4 -16 38185.8 1908.42   4
  -9   5  16 41133.9 2161.10   3
  -4  -5  19 1671.87 938.213   3
  -9   4 -19 2017.69 875.782   4
   9  -4  19 1960.40 916.463   1
  -4   9 -19-543.686 1353.91   4
   4   5 -19 1688.13 1413.23   4
   5  -9 -19 1835.69 611.418   2
   4  -9  19 605.891 986.917   1
  -4  -5  19 869.081 775.012   1
  -4   9 -22 6242.28 1713.67   4
  -4  -5  22 6376.40 1413.84   1
   4  -9  22 5021.97 1391.27   1
   9  -4  22 8189.42 1510.26   1
   4   5 -22 9203.27 1883.31   4
  -9   4 -22 6927.82 1401.24   4
   4   5 -25 2713.23 1625.12   4
  -4  -5  25 3310.44 1171.67   1
  -4   9 -25 4116.93 1728.14   4
   9  -4  25 4867.21 1532.42   1
   4  -9  25 548.396 1383.89   1
  -9   4 -25 3371.60 1254.11   4
   4   5 -28 219.085 1569.93   4
   4  -9  28 254.565 1354.68   1
  -4  -5  28-648.208 1344.06   1
  -4   9 -28 3316.56 1924.20   4
  -4  -5  31 22786.1 2901.94   1
  -6   9 -30 24951.2 3177.26   4
  -6  -3  30 21407.0 2665.93   1
  -9   6 -27 51442.7 3882.58   4
  -6   9 -27 46979.9 4231.19   4
   6   3 -27 53741.6 4406.29   4
   9  -6  27 56993.2 4030.68   1
   6  -9  27 46953.6 3983.27   1
  -6  -3  27 53051.2 3818.32   1
   9  -6  24 148533. 6353.64   1
  -9   6 -24 133792. 6367.98   4
   6   3 -24 162715. 7408.21   4
  -6  -3  24 150809. 6425.06   1
  -6   9 -24 154525. 7524.26   4
   6  -9  24 136741. 6583.02   1
  -6  -3  21 261224. 8137.04   3
  -6   9 -21 235318. 9536.45   4
  -9   6 -21 244604. 8693.36   4
  -6  -3  21 243072. 8146.17   1
   6  -9  21 244475. 8647.34   1
   9  -6  21 250191. 8203.10   1
  -9   3  21 240023. 7222.96   1
  -9   3  18 465320. 11107.0   1
   9  -6  18 475901. 12315.5   1
  -3  -6 -18 462140. 11090.6   4
  -6  -3  18 474184. 12449.5   3
  -6   9 -18 450412. 14021.5   4
   3  -9 -18 470528. 11221.1   2
  -9   3  18 483864. 11722.7   3
  -6  -3  18 464705. 12152.5   1
   6  -9  18 461937. 12716.5   1
  -3  -6 -18 452384. 11747.0   2
  -9   6 -18 465307. 12829.8   4
  -6   9 -15 337498. 10716.7   4
   9  -6  15 327729. 8992.19   1
  -9   3  15 342070. 7977.73   1
  -9   6 -15 332258. 9442.79   4
  -9   3  15 336485. 8716.79   3
  -3  -6 -15 320353. 7934.66   4
   6  -9  15 316103. 9353.38   1
  -6  -3  15 315027. 8866.32   1
  -3  -6 -15 316224. 8002.76   3
  -6  -3  15 329749. 9428.28   3
   3  -9 -15 336389. 8661.37   2
  -9   3  12 403615. 8929.07   1
  -6  -3  12 393778. 10141.2   1
  -6   9 -12 395232. 11444.3   4
   6  -9  12 403699. 10601.9   1
  -9   6 -12 421201. 10448.9   4
   9  -6  12 414284. 10177.1   1
   3  -9 -12 417831. 10321.1   2
  -9   3  12 393462. 9826.02   3
  -3  -6 -12 418773. 10017.9   3
  -6  -3  12 410048. 10796.4   3
   6  -9  12 406967. 9465.34   2
   9  -6   9 311926. 7840.77   1
  -6   9  -9 308829. 8855.76   4
   6  -9   9 297669. 7668.58   2
  -9   6  -9 309308. 8084.55   4
   3  -9  -9 303431. 8475.77   2
  -3  -6  -9 316249. 6253.38   4
  -6  -3   9 306564. 8670.59   3
  -9   3   9 305925. 7844.11   3
   6  -9   9 305835. 8368.20   1
  -9   3   9 308643. 6605.82   1
  -3  -6  -9 318479. 8343.13   3
   6  -9   6 430910. 10210.8   2
   9  -6   6 448868. 9857.61   1
  -6  -3   6 440237. 11086.3   3
  -6   9  -6 438333. 10887.6   4
  -9   6  -6 436662. 10112.0   4
   3  -9  -6 445248. 10992.6   2
   6  -9   6 423742. 10506.8   1
  -3  -6  -6 406949. 10771.0   3
  -3  -6  -3 530923. 13055.5   3
   3  -9  -3 531248. 12934.8   2
   9  -6   3 518084. 11261.8   1
   6  -9   3 560891. 12412.2   2
   3   6   3 541492. 10737.2   4
  -6   9  -3 545978. 12537.2   4
  -6  -3   3 583438. 13144.1   3
  -3   9   0 275012. 7052.77   4
  -3  -6   0 293421. 8196.06   3
   6  -9   0 271486. 7419.43   2
   3   6   0 277798. 6631.08   4
   9  -6   0 292351. 5970.55   1
   3  -9   0 270789. 7743.25   2
  -9   3   0 278491. 6034.61   1
  -6  -3   0 275662. 7707.24   3
  -3  -6   3 2339.82 806.272   3
   3  -9   3 2576.22 753.284   2
  -6  -3  -3 1156.86 552.392   3
  -3   9  -3 1549.18 514.064   4
   6  -9  -3 2343.96 719.086   2
   3   6  -3 2123.20 570.618   4
   3  -9   6 11072.9 1192.53   2
  -3  -6   6 13595.5 1557.48   3
  -6  -3  -6 12928.1 1298.06   3
   6  -9  -6 13538.4 1323.47   2
  -3   9  -6 14023.5 1517.03   4
   3   6  -6 11558.1 1384.62   4
   3  -9   9 33697.3 1868.86   2
  -9   3  -9 36253.8 1709.88   4
  -3   9  -9 29581.1 2327.56   4
   9  -3   9 29174.1 1755.27   1
  -3  -6   9 33220.5 2389.25   3
   9  -6  -9 31173.6 1107.51   1
   6  -9  -9 31890.9 1930.04   2
   3   6  -9 31119.4 2483.35   4
  -6  -3  -9 32516.4 1952.54   3
  -6  -3 -12 22512.8 936.827   4
   3   6 -12 22818.2 2279.46   4
   3  -9  12 21294.1 1940.11   1
  -3  -6  12 22109.7 1882.63   1
  -3  -6  12 21407.9 2004.65   3
   9  -3  12 20693.4 1595.98   1
   6  -9 -12 20513.8 1554.63   2
  -3   9 -12 21802.4 2305.59   4
   3  -9  12 17262.0 1292.88   2
  -6  -3 -12 18507.3 1456.23   3
  -9   3 -12 19658.0 1409.34   4
  -3   9 -15 92311.1 5242.63   4
  -6  -3 -15 101763. 3200.61   4
   9  -3  15 98642.8 4057.47   1
   3  -9  15 96294.3 3263.03   2
  -3  -6  15 97547.2 4360.12   1
   3   6 -15 103020. 5310.96   4
  -9   6  15 100916. 3441.30   3
   3  -9  15 99363.1 4538.48   1
  -3  -6  15 100771. 4542.04   3
  -6  -3 -15 107184. 3706.26   3
   6  -9 -15 101213. 3668.25   2
  -9   3 -15 105649. 3955.11   4
   3   6 -18 117167. 5992.39   4
   9  -3  18 97997.1 4377.37   1
   6  -9 -18 106312. 3729.07   2
  -9   3 -18 107611. 4382.52   4
  -3  -6  18 100339. 4703.91   1
   3  -9  18 102388. 4889.03   1
  -3   9 -18 107711. 5910.88   4
  -9   3 -21 314465. 9560.82   4
   9  -3  21 332694. 9808.62   1
  -3  -6  21 314147. 10118.5   1
  -3   9 -21 326520. 11704.2   4
   3  -9  21 317172. 10440.0   1
  -3  -6  24 255868. 9298.05   1
  -3   9 -24 260030. 10587.2   4
   3   6 -24 286019. 10633.2   4
   3  -9  24 253387. 9492.57   1
  -9   3 -24 255219. 8604.64   4
  -3   9 -27 246749. 10361.8   4
   3   6 -27 249825. 10212.6   4
  -3  -6  27 214751. 9007.52   1
   3  -9  27 233200. 9543.16   1
  -3  -6  30 110717. 6305.69   1
  -9   7 -31 95982.2 5669.34   4
  -7   9 -28 46179.1 4202.87   4
   9  -7  28 55192.0 4104.52   1
  -9   7 -28 47131.3 3860.37   4
   7   2 -28 56842.4 4612.15   4
   7  -9  28 45834.8 3890.93   1
   9  -7  25 70824.9 4379.95   1
  -7   9 -25 65867.5 4905.30   4
  -9   7 -25 72347.3 4672.89   4
   7   2 -25 83535.4 5249.36   4
   7  -9  25 80636.3 4893.66   1
  -7  -2  25 70077.3 4219.98   1
  -9   2  22 50200.3 2868.22   1
   9  -7  22 56824.4 3577.13   1
  -7   9 -22 47649.3 3989.12   4
  -9   7 -22 49422.6 3706.86   4
   7  -9  22 53821.4 3738.25   1
  -7  -2  22 48961.2 3216.75   1
   9  -7  19 100713. 4604.87   1
  -9   2  19 98615.5 3858.68   1
  -2  -7 -19 92738.5 4102.95   2
  -7   9 -19 92625.0 5398.70   4
  -9   7 -19 100097. 5116.13   4
   2  -9 -19 98463.7 3793.78   2
  -7  -2  19 100519. 4383.85   1
  -7  -2  19 103964. 4609.39   3
   7  -9  19 90619.7 4644.71   1
  -9   2  19 103433. 4286.13   3
   2  -9 -16 10049.3 1206.12   2
  -7   9 -16 14077.3 2029.24   4
  -7  -2  16 11123.1 1546.96   3
  -7  -2  16 10418.0 1264.07   1
   9  -7  16 10855.2 1399.92   1
  -9   2  16 10884.2 1097.97   1
  -9   2  16 11645.7 1358.08   3
  -2  -7 -16 11445.8 1372.70   2
   7  -9  16 11011.4 1543.46   1
  -9   7 -16 13137.0 1681.46   4
  -7   9 -13 21791.6 2256.03   4
  -7  -2  13 22065.2 1666.57   1
   2  -9 -13 22824.1 1825.23   2
   7  -9  13 22909.2 1963.70   1
  -7  -2  13 20484.1 1865.09   3
   9  -7  13 24952.2 1874.34   1
  -2  -7 -13 24032.2 1581.91   3
  -9   7 -13 23456.7 1970.29   4
  -9   2  13 22311.8 1360.87   1
  -9   2  13 23949.8 1823.18   3
  -2  -7 -10 901.349 484.883   3
  -9   7 -10 1308.94 624.027   4
  -7  -2  10 753.607 508.256   1
   2  -9 -10 747.557 742.764   2
   7  -9  10 996.255 531.481   2
  -7  -2  10 836.799 722.989   3
  -2  -7 -10 1022.41 244.642   4
  -7   9 -10 1646.16 873.825   4
   7  -9  10 410.966 607.201   1
   9  -7  10 1388.84 567.413   1
  -9   2  10 412.519 579.154   3
  -9   2  10 821.935 327.842   1
   7  -9   7 667.247 473.474   2
  -2  -7  -7 40.0425 503.458   3
   2  -9  -7 143.165 616.376   2
  -7   9  -7 1477.91 700.649   4
  -7  -2   7-343.686 728.969   3
   9  -7   7 730.103 418.055   1
  -2  -7  -7 788.223 217.582   4
  -9   7  -7 473.597 488.855   4
   7  -9   7 614.960 487.138   1
  -9   2   7 797.029 236.592   1
  -9   2   7 1393.83 642.501   3
   9  -7   4 60454.9 2191.57   1
   2  -9  -4 64201.8 3198.77   2
  -2  -7  -4 56429.6 1878.98   4
  -2  -7  -4 52617.5 2892.91   3
   7  -9   4 62016.9 2615.74   2
  -7   9  -4 58513.2 2725.33   4
  -7  -2   4 60606.3 2910.13   3
   7  -9   1 34548.1 1975.61   2
  -9   2   1 34400.8 1173.43   1
   9  -7   1 29151.7 1260.93   1
  -2  -7  -1 29799.3 1599.01   4
  -2  -7  -1 30146.7 2199.06   3
   2   7   1 33088.3 1449.25   4
   2  -9  -1 32505.0 2241.24   2
  -2   9   1 32995.4 1731.61   4
  -7  -2   1 35513.2 2133.30   3
   7  -9  -2 183851. 5408.12   2
  -2   9  -2 172300. 5181.16   4
   9  -7  -2 180007. 3937.39   1
   2  -9   2 179065. 5814.38   2
  -2  -7   2 175496. 6135.03   3
   2   7  -2 171066. 5094.01   4
  -7  -2  -2 173109. 5448.81   3
  -2   9  -5 116870. 4448.96   4
   2   7  -5 123008. 4570.45   4
   7   2   5 128381. 2874.07   4
   7  -9  -5 128346. 4322.62   2
   2  -9   5 125912. 4524.22   2
  -2  -7   5 125229. 4997.07   3
  -7  -2  -5 129568. 4353.07   3
   9  -7  -8 212253. 4700.42   1
  -2  -7   8 223467. 7232.06   3
  -2   9  -8 215060. 7118.56   4
   7  -9  -8 218741. 6219.05   2
   2  -9   8 224303. 6317.86   2
  -7  -2  -8 217714. 6202.46   3
   2   7  -8 225693. 7311.69   4
  -7  -2 -11 127777. 3016.76   4
   7  -9 -11 128445. 4280.86   2
  -2  -7  11 127048. 5120.68   3
  -2   9 -11 127715. 5561.69   4
   2  -9  11 124775. 4945.39   1
  -7  -2 -11 121654. 4195.19   3
   2  -9  11 131049. 4215.83   2
  -9   2 -11 124949. 3754.12   4
   9  -7 -11 118878. 3291.47   1
   2   7 -11 123318. 5549.49   4
   2  -9  14 153089. 4532.28   2
  -2   9 -14 158130. 6764.00   4
   7  -9 -14 150134. 4782.51   2
  -2  -7  14 153222. 5709.33   1
  -7  -2 -14 158232. 4866.09   3
   2  -9  14 153930. 5840.76   1
  -7  -2 -14 147675. 4015.28   4
  -2  -7  14 150551. 5806.08   3
  -2  -7  14 154429. 4979.01   2
   2   7 -14 140646. 6453.85   4
  -9   2 -14 163683. 4788.76   4
  -2   9 -17 126410. 6391.62   4
  -2  -7  17 121993. 5264.39   1
   2  -9  17 126369. 3791.26   2
   7  -9 -17 125344. 4240.54   2
   2   7 -17 128541. 6353.97   4
  -9   7  17 128266. 3984.33   3
  -2  -7  17 130633. 4095.65   2
  -9   2 -17 129231. 4589.10   4
  -7  -2 -17 131674. 4278.84   3
  -7  -2 -17 132646. 4119.45   4
   2  -9  17 126010. 5440.74   1
  -9   2 -20 74979.5 3597.11   4
   2   7 -20 83267.3 5110.80   4
  -2   9 -20 67301.3 4752.81   4
  -2  -7  20 69408.5 4054.00   1
   2  -9  20 68085.1 4131.07   1
  -2   9 -23 44096.5 4069.14   4
   2  -9  23 46006.6 3601.94   1
  -2  -7  23 48250.5 3575.82   1
   2   7 -23 48092.9 4101.82   4
  -2  -7  26 9371.98 1757.44   1
  -2   9 -26 9621.35 2190.38   4
   2  -9  26 12004.2 2195.15   1
   2   7 -26 14278.0 2591.98   4
   2  -9  29 8159.15 2004.26   1
  -2   9 -29 8147.76 2140.57   4
   2   7 -29 7259.88 2216.12   4
  -2  -7  29 7778.04 2098.72   1
   8  -9  29 89884.5 5637.45   1
  -8   9 -29 92009.8 5893.15   4
   9  -8  29 91794.3 5591.00   1
   8   1 -29 96445.7 6134.34   4
  -9   8 -29 87031.1 5539.68   4
   8  -9  26 49279.7 3897.72   1
  -9   8 -26 48655.0 3977.69   4
   9  -8  26 49916.0 3778.50   1
  -8   9 -26 50956.1 4249.84   4
   9  -8  23 55381.6 3746.37   1
  -9   8 -23 61745.9 4374.16   4
  -8   9 -23 63449.1 4633.38   4
  -8  -1  23 73081.1 3910.54   1
   8  -9  23 67173.8 4258.17   1
  -1  -8 -20 40581.3 2463.88   2
   1  -9 -20 40894.7 2379.68   2
  -9   8 -20 38432.8 3248.99   4
  -8  -1  20 40020.4 2740.95   1
  -8  -1  20 41558.6 2850.53   3
  -9   1  20 39651.6 2456.08   1
  -9   1  20 45259.9 2871.44   3
   8  -9  20 44609.7 3258.16   1
  -8   9 -20 38528.0 3490.68   4
   9  -8  20 38422.8 2909.30   1
  -9   8 -17 90313.3 4685.51   4
  -8   9 -17 85411.7 4841.53   4
   1  -9 -17 87269.3 3808.34   2
  -9   1  17 87767.3 3549.07   1
  -1  -8 -17 80298.0 3765.76   2
  -8  -1  17 87847.1 4132.06   3
  -8  -1  17 89411.3 3808.41   1
   9  -8  17 93588.5 4285.42   1
  -9   1  17 90501.7 4035.32   3
   8  -9  17 81412.7 4135.38   1
  -8   9 -14 76480.8 4234.68   4
  -1  -8 -14 72036.3 3685.19   2
   8  -9  14 78171.4 3757.04   1
   1  -9 -14 82661.7 3718.57   2
  -9   1  14 80348.9 3042.56   1
  -8  -1  14 75866.7 3674.08   3
   9  -8  14 75554.5 3588.44   1
  -8  -1  14 82753.9 3321.86   1
  -9   1  14 83557.7 3694.83   3
  -9   8 -14 77241.7 3981.45   4
  -8  -1  11 57562.4 2564.15   1
   8  -9  11 58008.0 2951.93   1
  -9   1  11 58738.6 2242.98   1
   9  -8  11 58130.0 2859.32   1
  -8   9 -11 63492.0 3366.73   4
   1  -9 -11 62818.6 3263.97   2
  -1  -8 -11 59398.7 3361.63   2
  -1  -8 -11 60724.0 2786.35   3
  -8  -1  11 60924.8 3126.60   3
  -9   8 -11 61942.7 3202.92   4
  -9   1  11 58518.5 2921.14   3
  -8  -1   8 21106.6 1753.78   3
  -8   9  -8 26591.5 1982.36   4
  -1  -8  -8 22913.3 1069.37   4
  -9   8  -8 23739.2 1799.98   4
  -1  -8  -8 24032.7 1851.33   3
  -9   1   8 21148.5 1152.41   1
   1  -9  -8 21916.1 1990.78   2
   9  -8   8 23397.3 1570.59   1
   8  -9   8 23699.5 1674.39   1
  -9   1   8 22092.8 1679.39   3
  -1  -8  -5 659.428 616.749   3
   9  -8   5 1197.75 451.110   1
   1  -9  -5 291.230 695.815   2
   8  -9   5 838.041 483.537   1
  -8  -1   5-66.6179 658.705   3
  -8   9  -5 584.982 549.563   4
  -9   8  -5 954.669 600.171   4
  -1  -8  -5 236.208 229.144   4
   8  -9   5 18.3662 468.508   2
  -9   1   5 402.278 620.618   3
   9  -8   2 26120.1 1315.32   1
   8  -9   2 25468.4 1682.83   2
  -1  -8  -2 25264.4 2071.49   3
   1  -9  -2 26148.3 2191.52   2
  -8  -1   2 25086.5 1816.09   3
   1   8   2 22115.8 1213.20   4
  -1   9   2 26771.7 1437.02   4
   1  -9   1 18082.5 1717.79   2
   9  -8  -1 19817.5 1029.56   1
   8  -9  -1 20426.0 1570.60   2
  -1   9  -1 16650.1 1287.98   4
  -1  -8   1 20520.1 1937.14   3
  -8  -1  -1 17383.2 1488.50   3
   1   8  -1 20035.0 1375.72   4
  -8  -1  -4 47327.8 2372.97   3
   1   8  -4 45428.3 2438.86   4
  -1  -8   4 42752.8 2840.39   3
   9  -1   4 36919.3 1721.45   4
   1  -9   4 42585.3 2584.84   2
   8   1   4 37449.9 1451.89   4
   8  -9  -4 41668.0 2227.60   2
  -1   9  -4 41734.7 2351.13   4
   9  -8  -7 21218.7 870.983   1
   9  -1   7 23063.2 1337.09   4
  -1   9  -7 22950.0 1963.44   4
   1   8  -7 21173.4 1892.48   4
   8   1   7 19458.9 1064.64   4
   8  -9  -7 24640.9 1694.83   2
  -8  -1  -7 21044.8 1625.10   3
   1  -9   7 20038.2 1686.59   2
  -1  -8   7 22614.1 2012.43   3
  -8  -1 -10 204201. 5960.51   3
  -1   9 -10 216232. 7465.30   4
  -9   1 -10 203238. 5042.29   4
   8  -9 -10 200723. 5922.47   2
   1   8 -10 217927. 7476.55   4
   1  -9  10 201291. 6047.82   2
  -1  -8  10 200476. 6954.82   3
  -8  -1 -13 175847. 5386.33   3
  -1  -8  13 172915. 5461.76   2
   1  -9  13 174509. 6330.31   1
  -1   9 -13 177107. 7246.31   4
   1   8 -13 173758. 7160.29   4
   8  -9 -13 176393. 5335.65   2
  -8  -1 -13 178392. 4442.66   4
   1  -9  13 176951. 5270.47   2
  -9   1 -13 177908. 4823.34   4
  -1  -8  13 176723. 6342.80   1
  -8  -1 -16 148679. 4359.18   4
  -1   9 -16 148293. 6857.99   4
  -9   1 -16 148008. 4659.66   4
   1   8 -16 134958. 6588.95   4
  -1  -8  16 143956. 5800.45   1
   1  -9  16 144043. 5858.66   1
   1  -9  16 146500. 4428.59   2
  -1  -8  16 151094. 4648.75   2
  -8  -1 -16 157469. 4840.12   3
   1  -9  19 118640. 5422.22   1
  -9   1 -19 116666. 4335.75   4
  -1   9 -19 110828. 6169.17   4
   1   8 -19 120836. 6329.96   4
  -1  -8  19 111573. 5267.40   1
   1   8 -22 105356. 6154.22   4
  -1   9 -22 94061.2 5881.43   4
  -1  -8  22 94666.7 5114.55   1
   1  -9  22 91424.3 5065.93   1
  -1  -8  25 19301.2 2508.23   1
  -1   9 -25 18107.8 2672.99   4
   1  -9  25 17023.6 2420.71   1
   1   8 -25 18269.0 2783.48   4
  -1   9 -28 19641.9 3034.68   4
   1   8 -28 14092.9 2536.06   4
  -1  -8  28 12632.4 2365.79   1
   1  -9  28 13636.7 2344.06   1
  -9   9 -30 58890.3 4653.58   4
   9  -9  27 74356.8 4886.17   1
  -9   9 -27 73565.4 5083.84   4
  -9   9 -24 24509.1 2850.61   4
   9  -9  24 26553.8 2682.63   1
   9  -9  21 1228.26 1024.43   1
  -9   0  21 419.211 648.405   1
  -9   9 -21 1744.00 1298.64   4
  -9   0  18 105413. 4176.80   1
  -9   9 -18 96757.7 5162.57   4
   0  -9 -18 95352.0 4123.19   2
  -9   0  18 98650.2 4489.42   3
   9  -9  18 99329.5 4746.55   1
   9  -9  15 70144.6 3597.42   1
   0  -9 -15 71168.1 3568.15   2
  -9   9 -15 75912.6 4112.97   4
  -9   0  15 64753.8 2929.00   1
  -9   0  15 76090.7 3658.15   3
  -9   9 -12 108445. 4841.87   4
  -9   0  12 117552. 3808.24   1
   0  -9 -12 117200. 4911.65   2
   9  -9  12 111015. 4398.56   1
  -9   0  12 118336. 4607.34   3
  -9   0   9 153140. 4482.39   1
   9  -9   9 157784. 5052.16   1
   0  -9  -9 161759. 6033.69   2
  -9   9  -9 163046. 5615.56   4
  -9   0   9 162081. 5426.36   3
  -9   9  -6 553882. 13462.5   4
   9  -9   6 592161. 12967.2   1
   0  -9  -6 574726. 13972.0   3
   0  -9  -6 573837. 14713.2   2
  -9   0   6 586006. 13594.0   3
   9  -9   3 735476. 15539.5   1
   0  -9  -3 728018. 17234.5   3
  -9   0   3 736889. 16440.4   3
   0  -9  -3 732860. 17887.4   2
  -9   0   0 637723. 14307.0   3
   9  -9   0 615316. 14078.1   2
   0  -9   0 615810. 15497.3   2
   0   9   0 638193. 13599.9   4
   0  -9   0 584188. 15109.3   3
   0   9  -3 578663. 13230.5   4
   9   0   3 547522. 11897.1   4
   0  -9   3 600616. 14566.9   3
   0  -9   3 583564. 14398.0   2
   9  -9  -3 574820. 13142.4   2
   9   0   6 239898. 5653.14   4
   0  -9   6 242416. 7366.67   2
   0   9  -6 233945. 7263.34   4
   9  -9  -6 223668. 6551.93   2
   0  -9   6 224791. 7590.78   3
   0   9  -9 427247. 11519.0   4
   9   0   9 389492. 9232.97   4
   0  -9   9 402658. 10431.3   2
   9  -9  -9 402857. 9915.57   2
   0  -9  12 135445. 5425.88   1
   0  -9  12 142730. 4835.09   2
   0   9 -12 146558. 6270.28   4
  -9   0 -12 142561. 3797.19   4
  -9   0 -15 108441. 3399.12   4
   0   9 -15 98757.8 5526.28   4
   0  -9  15 102363. 4801.49   1
   0  -9  15 105342. 3790.03   2
  -9   0 -18 24352.2 1751.30   3
   0   9 -18 25376.5 2894.76   4
   0  -9  18 22087.2 2252.37   1
   0  -9  21 3752.49 1197.63   1
   0   9 -21 2355.04 1569.86   4
   0  -9  24 19857.9 2518.34   1
   0   9 -24 21893.4 3029.81   4
   0  -9  27 52428.1 4247.49   1
   0   9 -27 59925.8 4918.84   4
 -10   5   0 196782. 4437.65   1
   5 -10   0 196356. 6064.33   2
   5   5   0 192290. 5102.78   4
  -5  10   0 198504. 5754.39   4
  -5  -5   0 196843. 6389.88   3
  -5  -5   3 29181.2 2246.87   3
  -5  10  -3 27505.9 1896.11   4
  10  -5   3 30599.9 1321.12   1
   5   5  -3 29527.3 1880.40   4
   5 -10  -3 26727.7 1955.15   2
  -5  -5  -3 31456.4 2203.15   3
   5 -10   3 28146.0 1898.90   2
   5 -10  -6 6792.53 1100.77   2
  -5  -5   6 6102.24 1190.52   3
  -5  -5  -6 6624.08 1046.05   3
  10  -5   6 6619.20 747.135   1
  -5  10  -6 8566.07 1212.09   4
   5   5  -6 7169.55 1076.74   4
   5 -10   6 5815.74 893.873   2
   5 -10  -9 16406.9 1502.87   2
  -5  -5   9 14142.8 1672.70   3
  10  -5   9 13866.4 1183.52   1
   5 -10   9 13537.4 1237.00   2
   5 -10   9 12168.9 1460.20   1
 -10   5  -9 11380.8 1113.97   4
  -5  10  -9 12493.6 1571.98   4
   5   5  -9 12028.2 1543.92   4
  -5  -5  -9 15329.0 1506.87   3
  -5  -5  12 3304.90 957.246   3
  -5  -5 -12 6214.36 949.623   3
  10  -5  12 3681.56 837.739   1
 -10   5 -12 4212.49 854.752   4
  -5  -5  12 5184.57 1028.39   1
  -5  10 -12 6480.26 1379.16   4
   5 -10 -12 4685.65 924.223   2
   5   5 -12 5303.34 1298.77   4
   5 -10  12 4649.52 1052.33   1
   5 -10  12 4883.43 798.223   2
 -10   5  15 10598.1 1144.33   3
  -5  -5  15 10956.2 1531.90   3
  10  -5  15 11969.6 1417.74   1
 -10   5 -15 9664.96 1295.98   4
  -5  10 -15 11666.7 1930.61   4
   5   5 -15 12361.6 1932.62   4
  -5  -5  15 10862.9 1433.48   1
   5 -10  15 11339.1 1024.75   2
  -5  -5 -15 12974.3 1226.47   3
   5 -10 -15 12443.5 1291.06   2
   5 -10  15 13574.3 1694.95   1
   5   5 -18 39022.3 3354.83   4
  10  -5  18 33960.8 2486.97   1
 -10   5 -18 38550.7 2671.90   4
  -5  -5  18 32345.1 2527.26   1
   5 -10 -18 40052.1 2242.70   2
  -5  10 -18 33451.6 3197.65   4
   5 -10  18 34471.7 2853.17   1
  -5  -5  18 36120.4 2750.48   3
 -10   5  18 38727.0 2284.43   3
  -5  -5  21 8360.48 1455.57   1
   5 -10  21 9307.12 1776.74   1
   5   5 -21 11510.9 2091.88   4
  -5  10 -21 11707.7 2243.41   4
 -10   5 -21 9914.93 1625.60   4
  10  -5  21 9989.66 1560.53   1
   5 -10  24 3760.93 1447.26   1
  -5  -5  24 3549.93 1174.96   1
 -10   5 -24 6608.42 1433.49   4
  10  -5  24 5703.33 1493.36   1
   5   5 -24 7729.08 1971.41   4
  -5  10 -24 3566.31 1890.37   4
   5   5 -27 10667.0 2212.85   4
  -5  -5  27 8805.87 1849.48   1
  -5  10 -27 6978.24 1920.10   4
   5 -10  27 9179.07 2011.09   1
  10  -5  27 13170.1 2269.77   1
  -5  -5  30-856.411 1364.29   1
  -6  10 -28 95852.4 6249.92   4
  10  -6  28 93464.5 5455.48   1
   6 -10  28 103168. 6037.63   1
  -6  -4  28 92380.7 5445.32   1
  10  -6  25 84433.6 4763.72   1
  -6  10 -25 87959.0 5818.42   4
 -10   6 -25 78840.4 4726.00   4
  -6  -4  25 86495.7 4908.26   1
   6 -10  25 89395.0 5359.36   1
  10  -6  22 32895.1 2761.35   1
 -10   6 -22 34305.7 2936.05   4
  -6  -4  22 33901.5 2834.34   1
  -6  10 -22 30928.1 3280.60   4
  -6  -4  22 40010.2 2898.67   3
   6   4 -22 40553.6 3535.95   4
   6 -10  22 38465.8 3226.80   1
   4 -10 -19 42111.5 2357.99   2
  10  -6  19 45364.1 2979.36   1
 -10   4  19 44937.6 2374.69   1
 -10   6 -19 40003.3 2955.06   4
   6   4 -19 44209.3 3575.34   4
  -6  10 -19 43478.2 3730.64   4
  -6  -4  19 37942.5 2750.85   1
   6 -10  19 44338.7 3228.44   1
  -4  -6 -19 41024.7 2629.85   2
  -6  -4  19 48971.4 3179.01   3
   4 -10 -16 51852.5 2706.90   2
 -10   4  16 50781.6 2225.45   1
   6 -10  16 49669.6 3223.51   1
  -6  -4  16 53201.4 3219.44   3
  10  -6  16 58169.3 3073.27   1
  -4  -6 -16 53435.9 2478.76   3
  -6  10 -16 60226.6 4080.75   4
  -6  -4  16 50465.6 2958.41   1
 -10   6 -16 52345.1 3091.88   4
 -10   4  16 55085.4 2794.57   3
  -4  -6 -13 31510.7 1329.30   4
  10  -6  13 34424.1 2181.66   1
  -6  -4  13 33952.5 2277.83   1
   6 -10  13 35761.2 1894.78   2
 -10   6 -13 34021.5 2215.25   4
   4 -10 -13 36956.5 2278.20   2
  -6  10 -13 34705.1 2908.88   4
  -6  -4  13 32829.6 2483.84   3
  -4  -6 -13 33863.2 2056.25   3
 -10   4  13 30070.9 1436.31   1
 -10   4  13 32361.8 1983.69   3
   6 -10  13 36201.2 2525.34   1
  -6  -4  10 8644.56 1281.59   3
  -4  -6 -10 8818.55 1144.66   3
 -10   6 -10 10690.1 1148.25   4
   4 -10 -10 9052.35 1178.80   2
  10  -6  10 10131.4 1094.21   1
  -6  10 -10 11847.8 1657.89   4
   6 -10  10 8760.92 1001.89   2
   6 -10  10 8595.71 1272.56   1
 -10   6  -7 34435.9 1903.33   4
  10  -6   7 34543.6 1731.16   1
  -6  10  -7 32223.6 2254.97   4
   6 -10   7 33970.7 2169.27   1
   6 -10   7 29969.1 1866.65   2
   4 -10  -7 30711.4 2175.50   2
  -4  -6  -7 34176.7 2265.21   3
  -6  -4   7 32070.4 2297.92   3
  10  -6   4 36377.2 1577.70   1
  -6  10  -4 35783.8 2212.70   4
   6 -10   4 33932.3 2146.28   2
   4 -10  -4 35524.8 2335.63   2
  -6  -4   4 37285.3 2438.48   3
  -4  -6  -4 34546.3 2323.65   3
   4 -10  -1 11056.8 1380.13   2
  10  -6   1 12345.8 691.167   1
 -10   4   1 12907.9 592.894   1
  -4  -6  -1 11191.3 1409.97   3
  -6  10  -1 13269.7 1268.07   4
  -6  -4   1 13337.8 1466.67   3
   4   6   1 11710.0 835.971   4
   6 -10   1 11671.4 1253.32   2
   6   4   2 114734. 3042.52   4
   4 -10   2 121065. 4434.68   2
 -10   4  -2 123999. 3231.12   1
   6 -10  -2 115657. 4270.57   2
  -4  -6   2 117594. 4744.31   3
  -4  10  -2 115210. 4116.10   4
  -6  -4  -2 108679. 4406.60   3
   4   6  -2 115651. 3904.09   4
  -4  10  -5 133251. 4818.50   4
   4 -10   5 131892. 4582.92   2
   4   6  -5 138544. 4944.53   4
  -4  -6   5 133661. 5195.77   3
   6 -10  -5 130928. 4640.17   2
  -6  -4  -5 126137. 4704.94   3
   4 -10   8 192607. 5599.50   2
  -4  10  -8 174959. 6198.23   4
  10  -4   8 176377. 5081.35   1
   4   6  -8 176641. 6573.34   4
  -4  -6   8 189143. 6465.67   3
  -6  -4  -8 172296. 5724.59   3
   6 -10  -8 189662. 5785.40   2
   4 -10  11 86419.7 3330.60   2
  -4  10 -11 92686.8 4617.69   4
   4 -10  11 96520.9 4267.30   1
   6 -10 -11 91012.2 3645.01   2
   4   6 -11 87977.4 4544.90   4
  10  -4  11 91430.5 3482.15   1
  -4  -6  11 90000.6 4275.43   3
 -10   4 -11 92885.9 3341.02   4
  -6  -4 -11 88471.1 3663.69   3
 -10   6  14 135460. 4407.02   3
  -4  -6  14 139482. 5376.82   1
  -6  -4 -14 141136. 3443.69   4
  -4  10 -14 139597. 6333.30   4
  10  -4  14 145351. 5014.87   1
   4 -10  14 138941. 4337.77   2
   6 -10 -14 141329. 4767.83   2
   4   6 -14 145353. 6371.89   4
   4 -10  14 142822. 5614.17   1
  -4  -6  14 144115. 5684.25   3
 -10   4 -14 135090. 4722.44   4
  -6  -4 -14 140081. 4743.28   3
  10  -4  17 51005.1 3000.94   1
 -10   4 -17 50931.7 2864.51   4
   4   6 -17 60181.6 4137.71   4
   4 -10  17 53170.1 3470.29   1
   6 -10 -17 59034.3 2745.70   2
  -4  10 -17 54364.9 4010.26   4
  -4  -6  17 50712.9 3203.70   1
  -4  -6  17 57212.5 3472.68   3
 -10   6  17 56563.1 2689.27   3
  -6  -4 -17 54460.6 2568.11   3
  -4  10 -20 151651. 7439.18   4
  10  -4  20 156188. 5928.56   1
 -10   4 -20 140650. 5597.61   4
  -4  -6  20 140313. 6048.74   1
   4 -10  20 139741. 6253.35   1
   6 -10 -20 152058. 4845.12   2
  10  -4  23 74404.2 4250.35   1
 -10   4 -23 76816.6 4170.89   4
   4 -10  23 79740.4 4878.38   1
  -4  10 -23 75043.3 5289.63   4
  -4  -6  23 74367.3 4476.61   1
  -4  -6  26 24545.0 2748.87   1
   4   6 -26 35542.7 3672.13   4
  -4  10 -26 28509.5 3363.83   4
   4 -10  26 28746.4 3167.64   1
   4 -10  29 2902.86 1407.10   1
  -4  -6  29 1274.61 1338.54   1
  -4  10 -29 5853.19 1877.97   4
  -7  10 -29 39718.2 3964.03   4
  10  -7  29 37927.6 3572.46   1
 -10   7 -29 38303.9 3543.09   4
  10  -7  26 44395.8 3529.51   1
   7   3 -26 49643.2 4183.95   4
 -10   7 -26 39244.0 3436.08   4
  -7  10 -26 46506.1 4197.69   4
  -7  -3  26 42774.1 3400.49   1
   7 -10  26 44978.0 3875.04   1
   7 -10  23 5109.80 1498.15   1
   7   3 -23 6176.12 1778.20   4
  10  -7  23 3539.54 1215.97   1
 -10   7 -23 5710.63 1462.42   4
  -7  -3  23 5493.57 1328.68   1
  -7  10 -23 1759.55 1360.04   4
  -7  -3  20 5552.18 1227.27   3
  -3  -7 -20 2740.89 821.320   2
  -7  -3  20 4454.55 1073.09   1
   7 -10  20 3860.66 1283.79   1
  -7  10 -20 1389.07 1084.86   4
 -10   7 -20 4507.94 1335.39   4
  10  -7  20 3668.17 1106.25   1
   3 -10 -20 3582.48 837.763   2
   7 -10  17 1429.99 928.750   1
  -7  -3  17-425.373 823.296   3
 -10   3  17 944.658 625.222   3
  -3  -7 -17-178.648 841.550   2
 -10   3  17 1390.90 585.596   1
   3 -10 -17 11.5279 637.149   2
  -7  -3  17-161.071 771.841   1
  10  -7  17 1300.74 858.622   1
 -10   7 -17 1994.56 948.875   4
  -7  10 -17-216.724 1007.49   4
   3 -10 -14 14506.3 1467.42   2
   7 -10  14 13812.3 1698.44   1
 -10   3  14 17620.6 1161.67   1
  10  -7  14 16141.6 1582.33   1
  -7  -3  14 15911.6 1769.54   3
 -10   7 -14 15197.1 1618.96   4
  -7  10 -14 17033.2 2161.92   4
  -3  -7 -14 14863.0 1348.36   3
  -7  -3  14 16795.9 1552.91   1
 -10   3  14 17853.6 1577.74   3
   7 -10  11 59347.4 3160.72   1
  -3  -7 -11 67296.4 3091.16   3
  -3  -7 -11 59760.6 1674.33   4
   7 -10  11 63282.5 2696.36   2
 -10   7 -11 63254.9 3102.21   4
  -7  10 -11 59748.1 3529.62   4
   3 -10 -11 65097.8 3297.02   2
  -7  -3  11 60613.8 3272.96   3
  -7  -3  11 66370.6 3028.99   1
  10  -7  11 61025.3 2855.74   1
 -10   3  11 63018.2 2877.76   3
 -10   3  11 62922.1 2031.29   1
 -10   7  -8 85687.1 3383.51   4
  -7  10  -8 78607.8 3785.09   4
   7 -10   8 86538.5 3620.71   1
   7 -10   8 83293.0 3261.62   2
  -3  -7  -8 89574.6 3823.72   3
   3 -10  -8 89604.2 3951.34   2
 -10   3   8 83359.5 2131.02   1
  -7  -3   8 87821.4 3912.63   3
  10  -7   8 91148.6 3252.60   1
  -3  -7  -5 109179. 4523.24   3
  -7  10  -5 121659. 4403.00   4
   7 -10   5 115231. 4056.97   2
   3 -10  -5 111880. 4573.43   2
  -7  -3   5 118827. 4649.74   3
  10  -7   5 115053. 3503.51   1
 -10   3   2 388697. 7749.39   1
   7 -10   2 392263. 9629.28   2
   3 -10  -2 385480. 10262.3   2
  -3  -7  -2 370819. 10357.8   3
  10  -7   2 361415. 8214.86   1
  -7  -3   2 389714. 10161.8   3
   3   7   2 382136. 8211.13   4
  -7  10  -2 396616. 9712.59   4
  10  -7  -1 236259. 5015.41   1
   3   7  -1 234572. 6130.31   4
  -7  -3  -1 238721. 7039.43   3
   7 -10  -1 242448. 6799.10   2
   3 -10   1 234188. 7114.11   2
  -3  -7   1 244544. 7587.61   3
  -3  10  -1 229537. 6405.50   4
 -10   3  -1 231607. 5418.15   1
  -3  10  -4 204082. 6241.60   4
   3 -10   4 199077. 6276.75   2
  -3  -7   4 202207. 6885.64   3
   7 -10  -4 201305. 6122.48   2
  -7  -3  -4 200495. 6236.51   3
   3   7  -4 206384. 6161.38   4
  -3  10  -7 106545. 4465.16   4
   3 -10   7 113954. 4173.08   2
   3   7  -7 111473. 4665.68   4
   7 -10  -7 103158. 4014.72   2
  -3  -7   7 106521. 4763.58   3
  -7  -3  -7 107864. 4109.04   3
   7 -10 -10 166771. 5392.69   2
   3   7 -10 166739. 6493.79   4
  10  -7 -10 163053. 3857.33   1
   3 -10  10 179784. 6107.96   1
   3 -10  10 173612. 5271.47   2
  -3  10 -10 173738. 6584.93   4
 -10   3 -10 172475. 4745.31   4
  -3  -7  10 165386. 6240.44   3
  -7  -3 -10 179421. 5545.95   3
   7 -10 -13 81515.4 3390.00   2
  -3  -7  13 81456.9 3942.95   1
   3 -10  13 85117.6 4108.51   1
  -3  10 -13 83274.6 4630.37   4
   3 -10  13 81217.2 3173.13   2
   3   7 -13 72583.0 4378.76   4
 -10   3 -13 82652.7 3142.08   4
  -7  -3 -13 81084.5 3428.52   3
  -3  -7  13 84827.1 4250.49   3
  -7  -3 -13 83851.9 2156.63   4
   3 -10  16 56392.4 3570.68   1
 -10   3 -16 53622.6 2798.68   4
  -3  10 -16 59048.1 4229.11   4
   3 -10  16 56098.8 2434.12   2
  -3  -7  16 59178.8 3451.50   1
   3   7 -16 62255.7 4182.26   4
  -3  -7  16 59600.1 3534.70   3
   7 -10 -16 58442.0 2744.72   2
  -7  -3 -16 57924.1 2754.73   3
 -10   7  16 57867.0 2561.29   3
   3 -10  19 7065.14 1565.16   1
 -10   3 -19 4222.59 915.847   4
  -3  10 -19 4500.32 1440.94   4
   3   7 -19 6007.96 1557.85   4
   7 -10 -19 5656.32 940.676   2
  -3  -7  19 5433.96 1324.13   1
  -3  -7  22 7863.55 1461.70   1
  -3  10 -22 6990.45 1879.40   4
   3   7 -22 7185.63 1918.74   4
 -10   3 -22 8035.73 1347.15   4
   3 -10  22 6931.84 1633.01   1
  -3  -7  25 7787.17 1781.29   1
   3 -10  25 7736.28 1773.95   1
  -3  10 -25 13455.0 2566.10   4
   3   7 -25 9533.77 2074.70   4
  -3  10 -28 26596.1 3462.00   4
   3   7 -28 29088.6 3495.63   4
  -3  -7  28 23082.5 2876.72   1
   3 -10  28 19548.1 2705.18   1
 -10   8 -30 826.726 1104.66   4
 -10   8 -27 4037.98 1489.59   4
  -8  10 -27 3578.42 1436.75   4
  10  -8  27 3368.63 1349.33   1
   8   2 -27 5763.70 1923.88   4
   8 -10  27 1643.71 1177.22   1
  10  -8  24 2510.48 1238.48   1
 -10   8 -24 612.187 1097.86   4
   8 -10  24 1384.51 1130.02   1
  -8  -2  24 1656.76 869.013   1
  -8  10 -24 178.329 1342.18   4
  -8  -2  21 1150.58 880.352   3
  10  -8  21 754.499 995.086   1
 -10   8 -21 1043.89 1079.80   4
   8 -10  21 568.725 1218.78   1
  -8  10 -21-1033.03 1449.79   4
  -8  -2  21 776.082 790.923   1
   2 -10 -18 11006.9 1308.63   2
 -10   2  18 15614.7 1347.29   1
 -10   2  18 16025.1 1682.50   3
  -2  -8 -18 10991.3 1405.81   2
  10  -8  18 10747.2 1547.83   1
   8 -10  18 13777.5 1793.45   1
  -8  -2  18 11544.8 1448.47   1
 -10   8 -18 15359.7 1941.97   4
  -8  10 -18 11871.5 2066.89   4
  -8  -2  18 12265.1 1606.63   3
  -2  -8 -15 82099.8 3132.81   3
 -10   8 -15 84038.0 4150.28   4
  -8  10 -15 78006.8 4591.77   4
   2 -10 -15 87129.3 3884.13   2
  -2  -8 -15 79752.6 3991.04   2
  -8  -2  15 76730.6 3495.64   1
   8 -10  15 81281.4 4010.49   1
  -8  -2  15 85925.8 4164.65   3
 -10   2  15 86269.7 3838.83   3
  10  -8  15 89401.6 3986.82   1
 -10   2  15 84178.7 3081.52   1
 -10   2  12 826.909 606.787   3
  -2  -8 -12 129.432 530.996   3
   8 -10  12-149.248 716.980   1
   2 -10 -12 1356.08 887.775   2
  -8  -2  12 585.334 742.034   3
 -10   8 -12 886.240 818.161   4
  -8  10 -12 1890.52 1158.85   4
 -10   2  12-54.4535 299.438   1
  -8  -2  12 74.3659 499.203   1
  10  -8  12 869.501 674.323   1
  -2  -8  -9-52.4527 545.876   3
 -10   2   9 407.353 278.534   1
   2 -10  -9 711.028 718.572   2
  -8  -2   9 1037.31 812.419   3
 -10   8  -9-466.422 621.845   4
 -10   2   9 361.348 523.159   3
  -8  10  -9-284.756 879.885   4
  -2  -8  -9 36.1338 177.419   4
  10  -8   9 1810.70 647.751   1
   8 -10   9-618.673 588.773   1
   8 -10   9 906.082 551.925   2
  -2  -8  -6 16240.9 1671.06   3
   2 -10  -6 19342.0 1921.73   2
 -10   8  -6 18780.5 1563.69   4
  -8  -2   6 17699.5 1634.66   3
 -10   2   6 15656.8 859.142   1
   8 -10   6 15937.6 1415.52   1
  -2  -8  -6 15992.9 854.133   4
  10  -8   6 19914.6 1323.26   1
   8 -10   6 17240.8 1428.68   2
 -10   2   6 17671.7 1517.31   3
  -8  10  -6 17083.6 1640.92   4
  -2  -8  -3 1166.46 683.761   3
   2 -10  -3 798.066 780.252   2
  -8  10  -3 2850.82 774.393   4
  10  -8   3 1254.90 343.529   1
  -8  -2   3 1023.12 713.704   3
  -2  -8  -3 1424.59 336.637   4
   8 -10   3 1091.63 635.236   2
  -2  -8   0-266.430 807.709   3
  -2  10   0 621.550 491.026   4
   2 -10   0 1899.76 756.656   2
  -8  -2   0 991.565 730.928   3
 -10   2   0 658.822 248.507   1
   2   8   0 988.082 461.644   4
   8 -10   0 1012.81 702.303   2
  10  -8   0 432.899 240.058   1
  -8  -2  -3 986.402 727.808   3
  -2  -8   3 2376.38 1027.78   3
   2 -10   3 2307.19 868.155   2
  -2  10  -3 1025.70 547.230   4
  10  -8  -3 2132.56 270.607   1
   2   8  -3 1975.20 582.662   4
   8 -10  -3 2376.39 756.242   2
   8   2   6 13512.7 623.071   4
  -2  -8   6 11262.2 1551.24   3
   2 -10   6 15525.5 1524.73   2
  10  -8  -6 12929.4 546.264   1
  -2  10  -6 14880.6 1568.94   4
   2   8  -6 14373.5 1562.15   4
   8 -10  -6 15322.1 1445.86   2
  -8  -2  -6 16805.2 1497.40   3
  -2  -8   9 8411.04 1473.33   3
   2 -10   9 10054.6 1188.42   2
  -2  10  -9 10426.4 1651.98   4
   2   8  -9 11526.5 1604.00   4
  -8  -2  -9 10984.4 1218.52   3
  10  -8  -9 9202.45 572.573   1
   8 -10  -9 9849.18 1194.63   2
  -2  -8  12 11886.6 1675.59   3
 -10   2 -12 11453.6 994.328   4
   2 -10  12 10591.9 1155.71   2
   8 -10 -12 9734.47 1184.35   2
   2 -10  12 8511.69 1410.06   1
  -2  10 -12 9178.47 1657.80   4
   2   8 -12 10902.8 1795.54   4
  -8  -2 -12 8888.98 1118.33   3
  -8  -2 -15 4842.97 955.319   3
  -2  -8  15 4052.02 852.325   2
   2   8 -15 4778.68 1457.31   4
 -10   2 -15 5641.53 801.054   4
  -2  10 -15 4705.86 1496.56   4
  -2  -8  15 5971.46 1275.63   1
   2 -10  15 4553.14 1232.51   1
   8 -10 -15 6088.55 1018.21   2
   2 -10  15 5009.74 798.907   2
 -10   2 -18-23.1088 585.301   4
  -2  -8  18-441.533 911.122   1
   2   8 -18 44.3470 1168.37   4
   2 -10  18 1149.94 1126.25   1
   8 -10 -18 167.004 486.433   2
  -2  10 -18 110.714 1226.70   4
  -2  -8  21 2949.71 1224.60   1
   2 -10  21 3299.96 1322.40   1
   2   8 -21 1529.45 1379.45   4
  -2  10 -21 1070.35 1319.85   4
   2 -10  24 1333.69 1302.67   1
  -2  10 -24 1909.77 1709.63   4
   2   8 -24-1621.20 1803.89   4
  -2  -8  24-443.868 1205.59   1
  -2  -8  27-1942.95 1628.86   1
  -2  10 -27 2374.42 1604.71   4
   2   8 -27-568.917 1617.83   4
   2 -10  27 518.283 1204.35   1
  10  -9  28 23888.4 2940.40   1
 -10   9 -28 22416.8 2867.55   4
  -9  10 -28 20165.6 2998.24   4
   9 -10  28 19718.3 2695.44   1
   9   1 -28 28453.2 3387.80   4
  10  -9  25 51720.0 3833.51   1
  -9  10 -25 47291.9 4150.26   4
 -10   9 -25 41131.8 3671.19   4
   9 -10  25 50629.4 3909.51   1
  10  -9  22 71816.4 4298.84   1
 -10   9 -22 72248.6 4716.04   4
  -9  10 -22 75876.0 5059.54   4
  -9  -1  22 75200.9 3952.40   1
   9 -10  22 79410.3 4630.97   1
  -1  -9 -19 86983.2 4055.27   2
  -9  10 -19 98168.3 5424.34   4
  10  -9  19 88021.3 4480.71   1
   9 -10  19 84366.4 4569.22   1
   1 -10 -19 85621.6 3902.39   2
  -9  -1  19 88017.4 4442.22   3
  -9  -1  19 91768.4 4094.49   1
 -10   1  19 98615.7 4469.10   3
 -10   9 -19 86752.3 4880.54   4
 -10   1  19 89456.8 3749.08   1
 -10   1  16 111075. 4066.82   1
 -10   9 -16 116093. 5309.99   4
  -9  -1  16 116836. 4372.17   1
  -9  10 -16 115471. 5567.97   4
  -9  -1  16 116993. 4982.56   3
  -1  -9 -16 110293. 4789.49   2
   9 -10  16 115727. 5027.83   1
   1 -10 -16 113885. 4732.80   2
 -10   1  16 118947. 4856.59   3
  10  -9  16 121061. 5015.49   1
  -9  -1  13 137284. 4553.00   1
 -10   9 -13 144010. 5532.29   4
  -9  10 -13 137820. 5699.27   4
   1 -10 -13 139156. 5391.97   2
   9 -10  13 138037. 5178.69   1
 -10   1  13 135626. 4187.65   1
  -1  -9 -13 131590. 5484.10   2
  10  -9  13 134452. 5026.96   1
  -9  -1  13 139264. 5343.26   3
 -10   1  13 138358. 5134.72   3
 -10   1  10 156350. 5385.42   3
  -9  -1  10 158002. 4818.73   1
 -10   9 -10 153930. 5548.51   4
   1 -10 -10 161345. 5970.95   2
   9 -10  10 152916. 5264.39   1
  -9  10 -10 154722. 5781.28   4
  10  -9  10 157689. 5154.81   1
  -1  -9 -10 168132. 5521.78   3
  -1  -9 -10 162541. 6223.79   2
  -9  -1  10 159367. 5659.04   3
 -10   1  10 150600. 4275.27   1
  -9  10  -7 98981.3 4189.02   4
  -1  -9  -7 101564. 2890.36   4
  10  -9   7 106211. 3681.80   1
   1 -10  -7 102515. 4679.99   2
  -1  -9  -7 110603. 4497.32   3
   9 -10   7 100126. 3793.45   1
 -10   9  -7 104263. 4038.79   4
  -9  -1   7 105612. 4316.13   3
 -10   1   7 106427. 4064.13   3
 -10   1   4 105863. 4086.89   3
  10  -9   4 106315. 3437.94   1
  -9  10  -4 110993. 4185.43   4
   9 -10   4 113151. 4037.81   2
   9 -10   4 110592. 3743.60   1
  -9  -1   4 109563. 4317.25   3
   1 -10  -4 111445. 4963.69   2
  -1  -9  -4 108408. 4690.39   3
   1   9   1 36034.9 1733.32   4
  -1  -9  -1 34298.5 2574.59   3
  10  -9   1 34203.8 1566.91   1
   1 -10  -1 37652.5 2733.50   2
   9 -10   1 34851.7 2137.16   2
  -1  10   1 34762.1 1831.64   4
  -9  -1   1 32935.5 2194.38   3
  -9  -1  -2 23483.4 1820.55   3
   1 -10   2 22172.4 2024.82   2
  -1  10  -2 23065.9 1635.78   4
   9 -10  -2 22974.8 1714.20   2
   1   9  -2 21011.1 1547.64   4
  -1  -9   2 25196.6 2225.19   3
  -1  -9   5 3627.94 1105.36   3
  -9  -1  -5 5356.65 984.058   3
   9   1   5 4099.48 487.983   4
   1 -10   5 5137.37 1086.05   2
  -1  10  -5 5532.37 1034.91   4
   9 -10  -5 4300.86 918.285   2
   1   9  -5 4396.48 979.414   4
  -1  -9   8 1982.44 1126.72   3
   1 -10   8 1506.20 737.612   2
   9   1   8 1104.85 342.475   4
  10  -9  -8 728.469 223.775   1
   1   9  -8 7.22815 749.462   4
   9 -10  -8 2296.77 786.229   2
  -9  -1  -8 718.446 695.956   3
  -1  10  -8 893.799 742.273   4
  -1  -9  11 16107.5 1894.94   3
  -9  -1 -11 18436.3 1610.51   3
   1   9 -11 20886.9 2274.30   4
  -1  -9  11 15902.8 1569.53   2
   1 -10  11 15154.7 1451.53   2
   9 -10 -11 15686.6 1444.31   2
  -1  10 -11 14040.0 1874.43   4
  -9  -1 -14 44309.9 1693.28   4
   9 -10 -14 47657.2 2498.96   2
  -1  -9  14 40558.0 2942.72   1
   1 -10  14 40951.2 3003.90   1
  -1  10 -14 45393.8 3571.24   4
   1   9 -14 37544.9 3287.91   4
 -10   1 -14 43946.4 1972.23   4
   1 -10  14 45195.7 2415.60   2
  -1  -9  14 43362.9 2463.83   2
  -9  -1 -14 44566.2 2444.82   3
  -1  10 -17 89171.9 5351.68   4
   1   9 -17 83845.0 5264.96   4
  -1  -9  17 99641.5 4835.16   1
   1 -10  17 89259.8 4694.62   1
 -10   1 -17 101704. 3559.68   4
  -9  -1 -17 94571.8 3745.38   3
  -1  10 -20 118629. 6678.46   4
   1 -10  20 124375. 5828.49   1
  -1  -9  20 121006. 5726.47   1
   1   9 -20 129021. 6832.78   4
   1 -10  23 70373.9 4612.75   1
  -1  10 -23 69526.2 5228.97   4
   1   9 -23 85382.8 5615.37   4
  -1  -9  23 88373.9 5061.91   1
  -1  10 -26 85428.1 5923.23   4
   1   9 -26 87324.9 5858.15   4
   1 -10  26 78605.5 5238.68   1
  -1  -9  26 79446.6 5182.12   1
  -1  -9  29 75162.4 5328.93   1
 -10  10 -29 68336.6 5057.97   4
  10 -10  26 87785.9 5255.15   1
 -10  10 -26 87057.3 5616.98   4
 -10  10 -23 161264. 7516.82   4
  10 -10  23 160287. 6974.81   1
 -10  10 -20 75949.4 4795.13   4
   0 -10 -20 69522.4 3525.81   2
 -10   0  20 70698.4 3949.36   3
  10 -10  20 69991.5 4122.75   1
  10 -10  17 51591.7 3296.34   1
 -10  10 -17 53547.6 3736.31   4
   0 -10 -17 53253.9 3158.71   2
 -10   0  17 54454.2 2800.76   1
 -10   0  17 56645.2 3369.37   3
 -10  10 -14 90845.7 4594.44   4
 -10   0  14 96743.3 3573.15   1
   0 -10 -14 93640.9 4530.80   2
  10 -10  14 94935.9 4311.60   1
 -10   0  14 100899. 4410.69   3
 -10   0  11 41789.1 2043.35   1
 -10  10 -11 45963.7 2947.27   4
 -10   0  11 40426.3 2651.20   3
  10 -10  11 42064.6 2483.00   1
   0 -10 -11 40021.0 2944.03   2
  10 -10   8 10132.8 1141.62   1
 -10   0   8 10654.7 1381.08   3
 -10  10  -8 8392.94 1260.57   4
 -10   0   5 17656.7 1640.36   3
   0 -10  -5 18972.4 2091.00   2
  10 -10   5 17341.9 1346.89   1
   0 -10  -5 20071.2 1963.48   3
 -10  10  -5 18964.4 1692.55   4
   0 -10  -2 6890.11 1313.84   3
   0  10   2 6577.34 799.432   4
   0 -10  -2 5115.60 1157.03   2
 -10   0   2 5241.11 1032.59   3
  10 -10   2 6030.96 732.449   1
 -10   0  -1 28442.5 2041.11   3
  10 -10  -1 30307.3 2022.30   2
   0 -10   1 30966.1 2527.74   3
   0 -10   1 30296.2 2545.24   2
   0  10  -1 28609.4 1762.01   4
  10   0   4 144314. 3975.76   4
  10 -10  -4 145120. 4981.62   2
   0 -10   4 154405. 6039.22   3
   0 -10   4 162297. 5953.05   2
   0  10  -4 149327. 5093.22   4
  10 -10  -7 272952. 7762.90   2
  10   0   7 289976. 6844.72   4
   0  10  -7 285294. 8575.53   4
   0 -10   7 284831. 8597.00   2
   0  10 -10 85221.2 4489.89   4
   0 -10  10 79837.7 3702.38   2
   0 -10  13 92401.0 4547.02   1
   0  10 -13 89168.6 4997.35   4
   0 -10  13 96514.2 3907.09   2
   0  10 -16 156316. 7284.06   4
   0 -10  16 169277. 6656.71   1
   0 -10  16 172673. 5361.05   2
   0  10 -19 130950. 6835.29   4
   0 -10  19 143553. 6284.62   1
   0 -10  22 73271.9 4638.59   1
   0  10 -22 75281.2 5267.44   4
   0  10 -25 91362.1 6060.39   4
   0 -10  25 80869.7 5233.56   1
   0 -10  28 11501.0 2301.21   1
  -6  -5  29 83206.3 5266.44   1
   6   5 -26 81425.4 5492.27   4
  11  -6  26 74932.3 4618.34   1
  -6  11 -26 85728.0 5889.73   4
  -6  -5  26 75426.5 4792.94   1
   6 -11  26 77134.7 5233.74   1
  -6  -5  23 29306.7 2784.07   1
 -11   6 -23 33608.0 2894.14   4
   6 -11  23 33125.8 3174.46   1
   6   5 -23 37387.9 3527.27   4
  -6  11 -23 36372.0 3770.29   4
  11  -6  23 31663.8 2787.23   1
  -6  -5  20 17215.9 2042.00   1
  -6  -5  20 17787.2 2078.75   3
 -11   6 -20 13775.3 1748.98   4
   6 -11  20 15658.1 2144.53   1
   5 -11 -20 16480.3 1521.82   2
  -5  -6 -20 13039.4 1542.45   2
  -6  11 -20 14616.0 2461.32   4
   6   5 -20 20185.8 2657.00   4
  11  -6  20 16607.1 1866.81   1
 -11   6 -17 78977.7 3889.60   4
  -6  11 -17 93495.3 5382.02   4
   5 -11 -17 80627.6 3587.53   2
  11  -6  17 89706.8 4086.70   1
  -6  -5  17 82722.4 4376.41   3
   6 -11  17 84953.0 4429.13   1
  -6  -5  17 82170.7 4095.57   1
 -11   5  17 85294.4 3712.65   3
   6   5 -17 93986.3 5115.37   4
   6 -11  14 31355.2 2537.17   1
  11  -6  14 30011.5 2135.48   1
 -11   6 -14 33768.1 2280.01   4
  -5  -6 -14 33018.5 2103.20   3
  -6  11 -14 27707.0 2763.67   4
   6 -11  14 31778.8 1877.15   2
  -6  -5  14 32258.2 2337.20   1
   6   5 -14 36727.9 3014.74   4
  -6  -5  14 30722.7 2498.38   3
   5 -11 -14 31783.6 2206.06   2
 -11   5  14 28243.7 1926.84   3
 -11   6 -11 57500.2 2764.21   4
  11  -6  11 58860.6 2727.31   1
  -6  11 -11 54882.0 3515.06   4
   5 -11 -11 54863.7 2951.20   2
   6 -11  11 56075.3 3202.39   1
   6 -11  11 62990.5 2787.23   2
  -6  -5  11 60185.0 3451.84   3
  -5  -6 -11 56924.3 2969.82   3
   5 -11  -8 2326.81 856.732   2
 -11   6  -8 3052.08 693.949   4
  -6  -5   8-79.6787 816.672   3
  11  -6   8 2220.68 558.220   1
  -5  -6  -8 1810.48 788.570   3
  -6  11  -8 1152.93 825.975   4
   6 -11   8 1544.50 717.325   1
   6 -11   8 2285.24 713.322   2
   5 -11  -5 186.542 702.454   2
  -6  -5   5 560.652 835.043   3
   6 -11   5 320.339 588.559   2
  -5  -6  -5-309.571 678.990   3
  -6  11  -5 468.965 680.590   4
  11  -6   5 301.217 303.953   1
   6   5  -5-320.681 661.781   4
  -5  -6  -2 32690.4 2379.43   3
   6   5  -2 34173.2 1940.35   4
   5 -11  -2 28936.2 2178.28   2
 -11   6  -2 30563.8 1407.22   1
   5   6   2 33076.4 1244.54   4
   6 -11   2 30601.9 2081.34   2
  -6  11  -2 31153.1 2066.42   4
  -6  -5   2 32702.9 2421.22   3
  11  -6   2 32936.6 1280.31   1
   5 -11   1 11478.5 1318.50   2
  -5  -6   1 13199.8 1634.39   3
  -6  -5  -1 13891.3 1586.92   3
 -11   5  -1 13093.8 785.045   1
   5   6  -1 11825.7 1056.22   4
   6   5   1 11854.8 881.290   4
  -5  11  -1 11264.4 1246.79   4
   6 -11  -1 12985.0 1451.11   2
   5 -11   4 50278.6 2704.95   2
   5   6  -4 49279.8 2675.29   4
   6 -11  -4 56811.7 2939.17   2
  -5  11  -4 46576.2 2735.88   4
  -5  -6   4 55757.5 3259.19   3
  -6  -5  -4 54278.9 3050.23   3
  -5  -6   7 4671.96 1179.60   3
   5   6  -7 4813.07 1012.74   4
  -6  -5  -7 5898.99 1074.44   3
  -5  11  -7 3776.81 873.447   4
  11  -5   7 7049.29 817.566   1
   6 -11  -7 7578.40 1111.92   2
   5 -11   7 5081.02 905.613   2
 -11   5 -10 66602.0 2788.51   4
  11  -5  10 63479.2 2768.25   1
   5   6 -10 68333.4 3876.55   4
   5 -11  10 64545.1 2914.22   2
   6 -11 -10 69462.7 3272.24   2
  -5  -6  10 67470.1 3687.66   3
  -6  -5 -10 68101.6 3287.78   3
   5 -11  10 68014.4 3518.90   1
  -5  11 -10 63754.5 3707.80   4
   5   6 -13 146907. 6366.20   4
  -5  11 -13 150006. 6412.85   4
  11  -5  13 136952. 4866.34   1
 -11   5 -13 144864. 4815.91   4
   5 -11  13 141263. 4626.62   2
   6 -11 -13 148793. 5115.28   2
  -5  -6  13 146061. 5499.74   1
  -5  -6  13 143994. 5848.97   3
   5 -11  13 145586. 5709.22   1
  -6  -5 -13 145751. 5074.14   3
  11  -5  16 116108. 4690.61   1
   5 -11  16 119554. 4018.73   2
  -5  11 -16 123947. 6253.47   4
   6 -11 -16 123931. 4545.64   2
  -5  -6  16 123135. 5144.44   1
   5   6 -16 140472. 6452.58   4
 -11   5 -16 115988. 4623.53   4
   5 -11  16 123559. 5398.68   1
  -5  -6  16 116717. 5372.24   3
  -6  -5 -16 122783. 4375.96   3
 -11   6  16 120911. 4323.53   3
   5   6 -19 42216.3 3593.65   4
  11  -5  19 33993.4 2586.48   1
   6 -11 -19 39302.6 2342.45   2
  -5  11 -19 30982.3 3298.33   4
   5 -11  19 36475.6 3035.93   1
  -5  -6  19 40971.4 3048.55   3
 -11   5 -19 41946.8 2837.90   4
  -5  -6  19 37979.3 2869.35   1
  11  -5  22 59094.1 3765.78   1
   5   6 -22 71206.5 4869.28   4
   5 -11  22 60925.1 4213.75   1
 -11   5 -22 57483.3 3589.81   4
  -5  -6  22 62987.7 4001.27   1
  -5  11 -22 65985.4 4912.31   4
  11  -5  25 30795.8 2912.02   1
   5   6 -25 40518.5 3896.39   4
  -5  11 -25 36755.0 3934.80   4
  -5  -6  25 30269.8 3058.40   1
   5 -11  25 30292.3 3198.40   1
  -5  11 -28 35230.4 4011.54   4
  -5  -6  28 28022.8 3164.84   1
   5 -11  28 34964.3 3623.37   1
   5   6 -28 34119.9 3748.21   4
  11  -7  27-126.970 986.650   1
 -11   7 -27 688.239 1020.33   4
  -7  11 -27-2309.33 1831.14   4
   7   4 -27-319.393 1496.39   4
  -7  -4  27-295.655 1154.58   1
   7 -11  27 644.159 1264.03   1
   7 -11  24-855.714 1352.09   1
  -7  11 -24 437.358 1351.14   4
  -7  -4  24-900.725 1155.71   1
   7   4 -24 1105.04 1215.68   4
 -11   7 -24 658.416 982.738   4
  11  -7  24 102.564 1129.42   1
  -7  -4  21 2351.52 1121.17   3
 -11   7 -21 144.077 877.048   4
   7 -11  21 1362.62 1144.10   1
  -7  -4  21 2983.98 1049.79   1
  11  -7  21 2186.59 1040.31   1
  -7  11 -21 1213.98 1175.01   4
   7   4 -21 2220.58 1533.60   4
  -7  -4  18 714.493 771.032   1
  -7  -4  18 1068.16 1022.26   3
  -4  -7 -18-507.715 891.096   2
 -11   4  18 456.214 667.543   3
   7 -11  18-371.338 964.469   1
 -11   7 -18-78.8748 925.136   4
  -7  11 -18 2249.27 1438.01   4
   4 -11 -18 104.522 641.474   2
  11  -7  18 368.992 829.072   1
   7 -11  15 811.104 844.144   1
  -4  -7 -15 1305.96 516.044   3
  -7  -4  15 1062.70 906.096   3
 -11   4  15 962.550 658.679   3
  -7  11 -15 2599.86 1222.40   4
 -11   7 -15 103.771 761.788   4
  11  -7  15 1820.26 889.482   1
  -7  -4  15 1431.78 857.014   1
   4 -11 -15 2807.87 872.369   2
   4 -11 -12 5324.17 1049.49   2
  11  -7  12 7874.03 1126.13   1
  -7  -4  12 5950.89 1045.19   1
  -4  -7 -12 7351.07 1092.43   3
  -7  -4  12 7025.17 1321.63   3
 -11   7 -12 4763.04 985.475   4
 -11   4  12 6602.57 551.190   1
  -7  11 -12 9418.54 1635.69   4
   7 -11  12 5532.96 921.615   2
   7 -11  12 5479.97 1126.39   1
 -11   4  12 6973.17 1015.33   3
   4 -11  -9-312.651 866.362   2
  -4  -7  -9 259.224 570.494   3
  -7  -4   9 477.943 782.562   3
  -7  11  -9-59.7174 855.942   4
 -11   7  -9 2506.85 797.378   4
  11  -7   9 416.417 554.625   1
   7 -11   9 330.480 647.254   1
   7 -11   9-45.7114 503.859   2
   4 -11  -6 2037.94 902.598   2
  -4  -7  -6 307.948 652.993   3
  -7  -4   6 1552.67 864.203   3
  11  -7   6 621.599 423.121   1
   7 -11   6 1586.58 693.109   2
  -7  11  -6 1510.08 799.403   4
   4 -11  -3 9154.60 1419.98   2
  -4  -7  -3 8739.87 1313.56   3
  -7  -4   3 11148.8 1533.96   3
  -7  11  -3 9991.29 1246.64   4
   4   7   3 9269.01 571.776   4
  11  -7   3 9319.91 750.674   1
   7 -11   3 11191.4 1304.63   2
   4 -11   0 12364.9 1539.29   2
  11  -7   0 12580.0 647.870   1
  -7  -4   0 12277.7 1413.33   3
   4   7   0 11755.3 979.123   4
  -4  11   0 12548.5 1262.15   4
 -11   4   0 11235.4 695.449   1
  -4  -7   0 14063.9 1627.22   3
   7 -11   0 12857.7 1386.75   2
   4 -11   3 5222.98 1039.27   2
  -4  -7   3 5471.24 1301.66   3
  -7  -4  -3 2733.83 899.793   3
   7   4   3 4901.21 401.962   4
  -4  11  -3 4896.91 909.590   4
   4   7  -3 5142.48 860.867   4
   7 -11  -3 6912.52 1138.26   2
   4 -11   6 14192.7 1455.52   2
  -4  -7   6 15871.6 1828.20   3
  -7  -4  -6 14254.5 1513.05   3
   4   7  -6 16963.4 1699.29   4
   7 -11  -6 15516.1 1538.21   2
  -4  11  -6 16168.7 1698.27   4
  -4  -7   9 10761.3 1544.60   3
   4   7  -9 8647.83 1469.94   4
  -7  -4  -9 11074.3 1300.88   3
   4 -11   9 11277.9 1218.19   2
   7 -11  -9 11960.9 1361.92   2
  -4  11  -9 10454.0 1566.70   4
  11  -4  12 15244.0 1421.52   1
 -11   4 -12 12959.1 1190.07   4
  -4  -7  12 14793.3 1845.93   3
  -7  -4 -12 12589.1 1366.19   3
  -4  11 -12 14616.7 1950.19   4
   4 -11  12 15521.2 1387.20   2
   4 -11  12 15075.9 1787.64   1
   4   7 -12 13654.2 1867.84   4
   7 -11 -12 15515.3 1506.21   2
 -11   4 -15 17727.2 1492.93   4
  -4  -7  15 16742.6 1998.09   3
   7 -11 -15 20118.6 1732.83   2
   4 -11  15 18099.8 1425.09   2
  -4  -7  15 19199.4 1962.43   1
  -4  11 -15 18172.0 2401.21   4
   4   7 -15 14916.6 2197.88   4
   4 -11  15 18929.2 2025.75   1
  -7  -4 -15 16063.2 1505.75   3
  11  -4  15 18074.4 1687.97   1
   4 -11  18 1145.33 942.831   1
  -4  -7  18 2829.58 1109.92   3
 -11   4 -18 1439.54 769.552   4
  -4  11 -18 1594.27 1220.51   4
   4   7 -18 3171.85 1601.78   4
   7 -11 -18 2392.27 765.815   2
  11  -4  18 2595.26 1106.49   1
  -4  -7  18 1425.69 960.540   1
  -4  -7  21 3289.58 1285.94   1
   4 -11  21 1202.08 1076.68   1
 -11   4 -21 1138.52 683.507   4
  -4  11 -21 3114.93 1519.89   4
   4   7 -21 2934.29 1444.72   4
  -4  -7  24 1628.63 1190.55   1
   4 -11  24 1395.14 1364.26   1
  -4  11 -24 22.9362 1453.96   4
   4   7 -24 2154.78 1781.64   4
  -4  -7  27 11472.3 2111.13   1
   4 -11  27 8288.23 1898.49   1
  -4  11 -27 12572.2 2408.19   4
  -4  -7  30 2428.21 1464.48   1
  11  -8  28 3431.64 1574.34   1
   8 -11  28 2962.20 1557.35   1
  -8  11 -28 957.145 1220.49   4
   8   3 -28-348.232 1224.96   4
 -11   8 -28-851.982 1235.81   4
  11  -8  25 363.604 1139.15   1
 -11   8 -25-18.9258 931.224   4
  -8  11 -25 536.741 1592.94   4
   8   3 -25 1236.25 1357.08   4
  -8  -3  25 584.692 993.088   1
   8 -11  25-1347.77 1316.90   1
  -8  11 -22-1289.81 1550.24   4
  -8  -3  22 222.341 802.517   1
 -11   8 -22 546.869 930.496   4
   8 -11  22 814.802 1255.48   1
  11  -8  22 2291.63 1153.05   1
  -8  -3  19 2114.51 876.714   3
 -11   3  19 2670.59 977.527   3
 -11   8 -19-27.0650 1115.26   4
  -3  -8 -19 1706.00 823.181   2
  -8  -3  19 2317.32 909.137   1
   8 -11  19 1516.61 1178.07   1
  -8  11 -19 540.660 1155.38   4
  11  -8  19 1732.86 999.472   1
   3 -11 -19 721.438 682.597   2
  11  -8  16 46763.8 2920.24   1
  -8  -3  16 44310.9 2714.73   1
   3 -11 -16 45559.9 2751.62   2
  -8  11 -16 45051.1 3620.44   4
   8 -11  16 47513.7 3136.24   1
  -3  -8 -16 42517.1 2913.51   2
 -11   8 -16 49755.9 3134.29   4
  -8  -3  16 51514.6 3311.43   3
 -11   3  16 49646.0 2871.43   3
   8 -11  13 191108. 6676.25   1
 -11   8 -13 209831. 6789.14   4
  -3  -8 -13 198104. 6240.36   3
  -8  -3  13 198130. 6299.19   1
   3 -11 -13 206839. 6783.15   2
 -11   3  13 197625. 5036.58   1
  -8  -3  13 202087. 7003.55   3
 -11   3  13 204220. 6394.71   3
  11  -8  13 202873. 6354.19   1
  -8  11 -13 197987. 7448.38   4
  -3  -8 -10 199724. 4282.54   4
 -11   8 -10 202938. 6371.00   4
  -3  -8 -10 218782. 6794.37   3
  -8  11 -10 202792. 7058.53   4
   8 -11  10 200142. 6551.63   1
   3 -11 -10 203545. 6904.78   2
  -8  -3  10 204946. 6951.83   3
   8 -11  10 207863. 6048.08   2
  11  -8  10 208870. 6085.47   1
 -11   3  10 212358. 4685.65   1
 -11   3  10 201575. 6229.99   3
 -11   8  -7 74672.7 3155.61   4
  -3  -8  -7 59422.9 1708.17   4
  -8  11  -7 66845.0 3370.70   4
   8 -11   7 66621.8 2976.79   2
   3 -11  -7 70165.1 3636.52   2
 -11   3   7 65395.1 1613.41   1
  -8  -3   7 69914.5 3583.69   3
  -3  -8  -7 66135.6 3437.39   3
  11  -8   7 69443.1 2741.12   1
   8 -11   7 65171.6 3129.60   1
  -3  -8  -4 95445.0 4406.95   3
 -11   3   4 95149.6 2212.86   1
   8 -11   4 96301.0 3834.32   2
  -8  11  -4 103404. 4048.99   4
   3 -11  -4 94690.6 4344.95   2
  11  -8   4 94685.5 3059.89   1
  -8  -3   4 96779.7 4197.69   3
  -3  11   1 59582.5 2647.93   4
   3   8   1 61525.7 2192.57   4
   8 -11   1 62576.7 3011.22   2
   3 -11  -1 54756.8 3225.58   2
  11  -8   1 57947.9 1913.90   1
  -3  -8  -1 58968.1 3394.71   3
  -8  -3   1 58946.5 3145.71   3
 -11   3   1 55932.5 1761.00   1
  -3  11  -2 112436. 4156.67   4
   3   8  -2 118384. 3985.39   4
   8 -11  -2 110416. 4303.50   2
   3 -11   2 119041. 4748.97   2
  11  -8  -2 113388. 2641.20   1
  -3  -8   2 115481. 5041.89   3
  -8  -3  -2 113225. 4510.55   3
   3   8  -5 201413. 6277.59   4
   8 -11  -5 195865. 6111.23   2
   3 -11   5 185686. 6207.76   2
  -3  -8   5 190352. 6910.15   3
  -3  11  -5 187942. 6244.20   4
  -8  -3  -5 189663. 6230.79   3
   8 -11  -8 139588. 4911.59   2
   3   8  -8 138042. 5559.79   4
   3 -11   8 133129. 4861.01   2
  -3  -8   8 139563. 5729.85   3
  -3  11  -8 138809. 5502.20   4
  -8  -3  -8 139173. 4999.07   3
   3 -11  11 1070.56 594.350   2
  -3  -8  11 512.896 886.113   3
  -8  -3 -11 1313.83 737.026   3
   3 -11  11 306.120 804.288   1
   3   8 -11 2251.42 1139.55   4
  -3  11 -11 1517.71 1127.84   4
   8 -11 -11 2911.89 802.456   2
  -3  -8  14-424.484 1068.16   3
   8 -11 -14 1225.71 742.042   2
  -8  -3 -14 1313.46 621.813   3
   3 -11  14 682.946 982.486   1
 -11   3 -14 868.577 461.670   4
  -3  -8  14 2335.08 1035.27   1
  -3  11 -14 920.121 1069.74   4
   3   8 -14 547.784 1075.27   4
   3 -11  14 1996.12 664.055   2
  -8  -3 -17 9430.59 1155.64   3
  -3  -8  17 10284.0 1162.07   2
 -11   3 -17 8892.96 1185.35   4
 -11   8  17 11058.2 1133.15   3
  -3  11 -17 8629.65 1765.59   4
   3   8 -17 7789.46 1868.28   4
  -3  -8  17 9209.94 1595.08   1
   8 -11 -17 11025.6 1277.00   2
   3 -11  17 9073.48 1615.43   1
   8 -11 -20 2553.12 742.553   2
   3 -11  20 4785.75 1425.33   1
  -3  11 -20 4593.00 1753.98   4
   3   8 -20 3713.16 1539.65   4
  -3  -8  20 2955.52 1217.63   1
  -3  -8  23 998.555 1063.12   1
   3 -11  23 608.897 1159.33   1
  -3  11 -23-82.6782 1522.60   4
   3   8 -23 84.3365 1317.57   4
  -3  11 -26 2330.31 1835.79   4
   3 -11  26 590.566 1322.92   1
  -3  -8  26 1419.71 1067.82   1
   3   8 -26-2380.53 1849.68   4
  -3  -8  29 43771.7 4039.25   1
 -11   9 -29 8342.09 1830.58   4
   9 -11  26 21253.2 2820.44   1
  11  -9  26 22331.5 2688.30   1
  -9  11 -26 23941.7 3198.22   4
 -11   9 -26 18889.6 2548.05   4
   9   2 -26 29345.8 3324.54   4
  11  -9  23 48972.1 3578.12   1
  -9  11 -23 53385.5 4420.40   4
   9 -11  23 48042.5 3753.64   1
 -11   9 -23 49651.5 3907.63   4
  11  -9  20 30811.1 2649.27   1
 -11   9 -20 28708.2 2869.76   4
  -9  11 -20 36495.8 3433.21   4
  -2  -9 -20 34606.1 2518.38   2
  -9  -2  20 38598.3 2743.34   1
   2 -11 -20 36095.7 2428.82   2
  -9  -2  20 37499.4 2973.99   3
   9 -11  20 38343.7 3142.74   1
  -9  11 -17 74064.2 4557.22   4
 -11   9 -17 66861.2 3986.73   4
  -9  -2  17 65918.4 3360.74   1
  -2  -9 -17 64909.0 3636.97   2
   2 -11 -17 69781.1 3579.91   2
   9 -11  17 68684.7 3966.01   1
  -9  -2  17 69805.7 3897.97   3
 -11   2  17 76026.4 3842.01   3
  11  -9  17 67302.7 3672.12   1
  -2  -9 -14 22820.7 1718.02   3
  -9  11 -14 24353.3 2383.37   4
   2 -11 -14 27657.0 2300.46   2
   9 -11  14 25182.8 2180.61   1
  -9  -2  14 24635.1 1870.67   1
  -2  -9 -14 26904.3 2335.75   2
 -11   9 -14 25732.4 2279.23   4
  -9  -2  14 24742.1 2174.05   3
 -11   2  14 26020.4 1516.76   1
  11  -9  14 25041.8 2087.84   1
 -11   2  14 24882.2 2052.89   3
 -11   9 -11 196383. 6518.14   4
  -9  11 -11 193472. 6990.84   4
  -9  -2  11 198415. 6001.17   1
   9 -11  11 201592. 6488.38   1
 -11   2  11 199173. 4986.26   1
  -2  -9 -11 196981. 6427.94   3
   2 -11 -11 197937. 6922.89   2
  11  -9  11 210036. 6302.68   1
  -9  -2  11 197556. 6794.09   3
 -11   2  11 197835. 6400.89   3
   9 -11   8 226145. 6568.08   2
 -11   9  -8 223111. 6785.50   4
  -9  11  -8 228747. 7268.32   4
  -2  -9  -8 221884. 5176.06   4
   9 -11   8 224252. 6764.67   1
 -11   2   8 222933. 5236.57   1
   2 -11  -8 247832. 7847.25   2
  -2  -9  -8 230266. 7351.11   3
  11  -9   8 235927. 6452.43   1
  -9  -2   8 231793. 7371.92   3
 -11   2   8 241666. 6930.75   3
  -9  11  -5 144993. 5209.40   4
   9 -11   5 148868. 4947.15   2
   2 -11  -5 145719. 5791.74   2
  11  -9   5 151041. 4345.27   1
 -11   2   5 158523. 5145.57   3
  -2  -9  -5 138977. 5576.46   3
   9 -11   5 144741. 4788.91   1
  -9  -2   5 142333. 5333.46   3
  -2  -9  -5 134922. 3856.41   4
  -2  -9  -2 9323.49 1500.64   3
  11  -9   2 6769.40 700.400   1
  -9  -2   2 5450.49 1180.53   3
   2   9   2 7063.15 721.059   4
   2 -11  -2 6574.80 1272.73   2
   9 -11   2 7654.47 1134.34   2
   2 -11   1 52392.3 3221.12   2
  -2  11  -1 56430.8 2672.83   4
   2   9  -1 57393.2 2489.93   4
   9 -11  -1 54851.0 2857.37   2
  11  -9  -1 59483.7 1868.61   1
  -2  -9   1 55456.9 3419.88   3
  -9  -2  -1 53370.7 2962.08   3
   9   2   4 11459.8 683.046   4
  -2  -9   4 13385.0 1820.86   3
  -9  -2  -4 11887.8 1391.11   3
   2 -11   4 10597.6 1405.13   2
  -2  11  -4 11856.6 1305.15   4
   2   9  -4 11275.8 1264.75   4
  11  -9  -4 11430.4 623.792   1
   9 -11  -4 11943.4 1386.80   2
  11  -9  -7 17293.0 679.484   1
  -2  -9   7 19214.6 2149.69   3
   2 -11   7 19277.6 1800.20   2
   9 -11  -7 19207.4 1718.24   2
  -2  11  -7 17878.3 1861.13   4
   2   9  -7 17361.7 1833.99   4
  -9  -2  -7 19146.6 1700.62   3
  -2  -9  10-734.475 899.152   3
   2 -11  10 863.811 644.692   2
  -9  -2 -10 1011.77 730.929   3
  -2  11 -10 26.6679 855.525   4
   9 -11 -10 1702.55 738.784   2
   2   9 -10 1.42097 829.587   4
 -11   2 -13 726.974 387.402   4
   2 -11  13 1900.55 624.977   2
  -9  -2 -13 590.122 587.349   3
   2 -11  13 1785.44 1044.05   1
  -2  -9  13 3684.03 1109.44   1
  -2  11 -13 303.877 1279.04   4
   2   9 -13 960.724 1018.93   4
  -2  -9  13 924.631 643.698   2
   9 -11 -13 1241.75 676.100   2
  -2  -9  13 2101.52 1126.99   3
  -2  -9  16 62386.0 3744.22   1
 -11   2 -16 62358.0 2677.26   4
   9 -11 -16 58506.7 2935.60   2
  -2  11 -16 62749.9 4410.71   4
   2   9 -16 59703.1 4241.14   4
   2 -11  16 59829.6 3774.28   1
   2 -11  16 60263.7 2773.56   2
  -2  -9  16 66204.0 3107.57   2
  -9  -2 -16 60228.5 3040.87   3
  -2  11 -19 25043.2 3077.23   4
   2   9 -19 22121.2 2789.94   4
  -2  -9  19 28142.3 2690.75   1
  -2  -9  22 32880.6 2985.09   1
  -2  11 -22 28777.8 3311.95   4
   2 -11  22 36055.3 3295.43   1
   2   9 -22 39749.3 3828.70   4
   2 -11  25 32502.8 3400.85   1
  -2  11 -25 34215.1 3838.05   4
   2   9 -25 35223.6 3782.17   4
  -2  -9  25 30363.6 3204.24   1
  -2  -9  28 31597.0 3368.92   1
   2 -11  28 34868.6 3695.66   1
  10 -11  27 3068.01 1532.44   1
 -11  10 -27-329.974 1188.63   4
 -10  11 -27-637.326 1394.16   4
  11 -10  27 355.950 1296.99   1
  10 -11  24-456.258 1211.15   1
 -11  10 -24-395.483 1296.39   4
 -10  11 -24 1313.07 1270.06   4
  11 -10  24 2586.20 1342.98   1
  11 -10  21 1640.70 1067.04   1
 -10  11 -21 1678.39 1354.20   4
  10 -11  21 2176.77 1220.10   1
 -11  10 -21 1830.39 1234.80   4
   1 -11 -18 474.513 758.441   2
 -10  -1  18 1521.43 983.154   3
  -1 -10 -18 2184.43 986.244   2
 -11   1  18 810.516 791.543   3
 -10  11 -18 4209.13 1533.30   4
  10 -11  18 1164.89 931.159   1
 -10  -1  18 913.965 720.173   1
  11 -10  18 91.4228 980.931   1
 -11  10 -18-23.2974 1075.50   4
 -10  -1  15 6546.43 984.221   1
   1 -11 -15 6866.28 1295.82   2
 -11   1  15 6465.05 878.959   1
 -10  -1  15 5697.44 1252.91   3
  -1 -10 -15 7101.41 1299.73   2
 -11   1  15 7211.33 1366.32   3
  10 -11  15 8143.26 1445.43   1
 -11  10 -15 7151.29 1390.53   4
 -10  11 -15 5942.76 1372.38   4
  11 -10  15 6193.27 1320.11   1
   1 -11 -12 2943.83 1085.99   2
 -11   1  12 3795.76 597.231   1
 -10  -1  12 2325.63 935.713   3
  10 -11  12 3647.20 979.094   1
  -1 -10 -12 1972.99 906.554   2
 -11   1  12 1388.92 714.009   3
 -11  10 -12 3706.25 894.577   4
  11 -10  12 3715.55 937.951   1
 -10  -1  12 2991.51 748.329   1
 -10  11 -12 4605.12 1231.35   4
  10 -11   9 2944.00 802.093   1
  -1 -10  -9 3087.83 903.763   3
 -11   1   9 3337.43 857.702   3
 -10  11  -9 2331.16 837.385   4
   1 -11  -9 2738.42 948.705   2
 -10  -1   9 2233.81 883.780   3
  11 -10   9 2835.67 773.069   1
 -11  10  -9 2225.52 873.567   4
  -1 -10  -9 2211.00 1020.57   2
 -11   1   9 4084.23 575.838   1
  -1 -10  -6 18536.5 1920.97   3
 -11  10  -6 20279.5 1769.98   4
  10 -11   6 18628.8 1529.48   1
   1 -11  -6 21112.9 2187.76   2
 -10  -1   6 20834.4 1866.66   3
 -10  11  -6 21699.4 1891.49   4
  11 -10   6 20129.2 1449.34   1
 -11   1   6 21162.3 1837.42   3
  -1 -10  -3 1661.63 876.067   3
   1 -11  -3 1482.82 885.608   2
  10 -11   3 1021.54 512.410   1
  10 -11   3 1760.88 785.975   2
 -10  -1   3 536.239 791.266   3
 -11   1   3 2846.05 987.862   3
  11 -10   3 1862.97 512.966   1
  -1 -10   0 7129.84 1342.55   3
   1 -11   0 9526.23 1542.16   2
 -10  -1   0 8790.05 1234.33   3
  -1  11   0 7710.96 982.340   4
   1  10   0 9882.46 1014.69   4
  11 -10   0 8452.42 753.038   1
  10 -11   0 8693.44 1260.47   2
  -1 -10   3 6285.12 1318.47   3
 -10  -1  -3 5378.56 1097.65   3
  -1  11  -3 4964.71 882.034   4
   1 -11   3 5548.62 1234.04   2
   1  10  -3 6929.80 1031.90   4
  10 -11  -3 5066.30 1011.62   2
  10   1   3 4912.00 561.122   4
  -1 -10   6-403.654 1081.19   3
   1 -11   6 288.941 829.582   2
  10   1   6 278.442 256.317   4
  -1  11  -6 178.732 811.055   4
  10 -11  -6-437.577 698.327   2
 -10  -1  -6 341.515 621.674   3
   1  10  -6 1873.66 812.762   4
  -1 -10   9 934.388 929.170   3
 -10  -1  -9 722.020 711.626   3
  -1 -10   9 617.212 795.683   2
   1 -11   9 448.707 660.063   2
  -1  11  -9 1884.54 1018.73   4
  10 -11  -9 1179.75 688.058   2
   1  10  -9 1532.24 1084.60   4
   1 -11  12 2430.65 839.935   2
  -1 -10  12 3397.78 863.376   2
 -10  -1 -12 2764.16 828.371   3
  -1  11 -12 2600.36 1225.22   4
   1  10 -12 1172.35 956.126   4
  10 -11 -12 2450.75 807.568   2
   1 -11  15 1300.01 612.397   2
  -1 -10  15 1696.87 716.176   2
 -10  -1 -15 1427.36 742.796   3
  -1 -10  15 1653.88 1194.41   1
  -1  11 -15 2649.66 1221.14   4
   1 -11  15 1960.74 1128.23   1
   1  10 -15 1120.05 1221.68   4
 -10  -1 -18 6536.24 1076.75   3
  -1  11 -18 5152.26 1669.31   4
   1  10 -18 3497.78 1492.92   4
  -1 -10  18 6823.14 1525.31   1
   1 -11  18 5723.74 1433.02   1
  -1 -10  21 1020.89 1117.76   1
   1 -11  21 652.848 1089.96   1
  -1  11 -21-303.070 1620.12   4
   1  10 -21 230.207 1421.58   4
   1  10 -24 2368.39 1279.94   4
  -1 -10  24 5253.60 1650.47   1
  -1  11 -24 3402.48 1788.35   4
   1 -11  24 3985.66 1633.21   1
   1  10 -27 2646.60 1999.93   4
  -1 -10  27 452.528 1299.39   1
   1 -11  27 1743.36 1466.40   1
  -1  11 -27 323.124 1656.53   4
 -11  11 -28 3689.94 1691.44   4
 -11  11 -25 32110.7 3442.16   4
  11 -11  25 31706.4 3181.27   1
  11 -11  22 20492.9 2465.07   1
 -11  11 -22 17675.0 2550.53   4
 -11  11 -19 45123.6 3648.19   4
 -11   0  19 45698.8 3263.05   3
   0 -11 -19 43443.2 2970.32   2
  11 -11  19 40431.2 3206.65   1
   0 -11 -16 11388.1 1670.83   2
 -11   0  16 9193.83 1510.95   3
 -11  11 -16 8359.66 1630.87   4
  11 -11  16 9985.56 1521.51   1
   0 -11 -13 18926.8 2111.06   2
 -11   0  13 17865.3 1912.78   3
  11 -11  13 19399.5 1843.81   1
 -11  11 -13 16670.2 2136.23   4
 -11   0  13 20495.8 1467.59   1
 -11  11 -10 61544.6 3429.25   4
 -11   0  10 62282.7 2551.75   1
  11 -11  10 64000.0 3169.71   1
   0 -11 -10 62263.8 3836.56   2
 -11   0  10 62457.3 3423.44   3
  11 -11   7 6463.64 996.229   1
   0 -11  -7 8626.51 1504.69   2
 -11   0   7 8890.37 1372.40   3
 -11  11  -7 8712.91 1311.68   4
   0 -11  -4 19328.6 2053.54   3
   0 -11  -4 18172.0 2097.90   2
  11 -11   4 18962.8 1395.17   1
 -11   0   4 19119.1 1815.86   3
   0 -11  -1 5751.84 1239.09   3
   0 -11  -1 4448.18 1165.95   2
  11 -11   1 6926.57 787.058   1
 -11   0   1 6930.41 1266.60   3
   0  11   1 7717.72 933.750   4
   0 -11   2 3433.61 1184.16   3
   0 -11   2 1960.40 951.550   2
   0  11  -2 3409.51 793.687   4
 -11   0  -2 3241.87 977.303   3
 -11   0  -5 26165.8 2045.23   3
   0  11  -5 22506.8 1945.85   4
   0  11  -8 318210. 9642.68   4
   0 -11   8 317286. 9434.68   2
   0  11 -11 184223. 7178.40   4
   0 -11  11 178379. 6226.09   2
 -11   0 -14 116948. 4524.94   3
   0 -11  14 107486. 5129.26   1
   0 -11  14 106949. 4355.86   2
   0  11 -14 108008. 5777.97   4
 -11   0 -17 21598.9 1854.43   3
   0  11 -17 17028.7 2441.31   4
   0 -11  17 21158.9 2404.14   1
   0  11 -20 15420.8 2485.76   4
   0 -11  20 17477.1 2391.38   1
   0  11 -23 45956.2 4271.61   4
   0 -11  23 48672.9 3894.39   1
   0  11 -26 76227.6 5713.09   4
   0 -11  26 61766.6 4760.58   1
   6   6   0 979488. 20281.2   4
   6 -12   0 985812. 21919.6   2
  -6  -6   0 999999. 22529.7   3
   6   6   3 505518. 10172.9   4
   6 -12  -3 530904. 13145.5   2
   6 -12   3 557554. 13125.7   2
  -6  -6   3 553019. 13850.6   3
  -6  -6  -3 559408. 13683.6   3
  -6  12  -3 553852. 12966.0   4
   6   6  -3 543003. 12563.1   4
   6 -12   6 265024. 7748.07   2
  12  -6   6 288384. 6803.68   1
  -6  12  -6 264672. 8168.60   4
   6   6  -6 280421. 8265.74   4
   6 -12  -6 267356. 8131.87   2
  -6  -6   6 264204. 8573.51   3
  -6  -6  -6 256986. 8171.31   3
  12  -6   9 147575. 4569.67   1
   6 -12   9 148387. 5588.99   1
   6   6  -9 140722. 5769.77   4
   6 -12   9 135737. 4902.30   2
  -6  -6   9 134970. 5725.02   3
  -6  -6  -9 145639. 5443.07   3
   6 -12  -9 152194. 5444.79   2
  -6  12  -9 132874. 5619.88   4
  -6  12 -12 168161. 6859.76   4
  12  -6  12 159681. 5327.62   1
   6 -12 -12 166796. 5829.30   2
 -12   6 -12 162555. 5334.06   4
  -6  -6  12 167269. 6518.65   3
   6 -12  12 185788. 6503.03   1
   6 -12  12 170140. 5390.07   2
   6   6 -12 164930. 6714.64   4
  -6  -6 -12 164568. 5777.46   3
  -6  12 -15 72608.5 4670.82   4
 -12   6 -15 78865.7 3557.95   4
   6 -12  15 76903.2 3237.68   2
  -6  -6  15 79792.8 3976.13   1
   6 -12 -15 73823.1 3592.33   2
   6 -12  15 87041.7 4396.89   1
   6   6 -15 81126.8 4714.84   4
  -6  -6  15 80212.2 4373.57   3
  12  -6  15 78681.3 3639.75   1
  -6  -6 -15 74506.6 3446.60   3
 -12   6  15 73839.2 3349.02   3
   6 -12  18 26032.7 2544.70   1
   6   6 -18 34506.3 3327.87   4
   6 -12 -18 31602.2 2197.05   2
  -6  12 -18 30563.7 3240.93   4
  12  -6  18 31454.8 2472.36   1
  -6  -6  18 29353.4 2580.47   1
  -6  -6  18 29948.6 2787.03   3
 -12   6  18 30714.9 2221.50   3
 -12   6 -18 27956.3 2293.02   4
  -6  -6  21 891.940 962.629   3
  -6  -6  21 679.355 866.459   1
 -12   6 -21-1335.28 1020.05   4
   6 -12  21-143.082 964.179   1
  -6  12 -21 245.824 1351.89   4
  12  -6  21-337.617 936.334   1
   6   6 -21 338.355 1386.89   4
  -6  12 -24 8280.09 2123.11   4
  -6  -6  24 9773.06 1866.83   1
   6 -12  24 8294.96 1947.52   1
   6   6 -24 6507.84 1842.68   4
  12  -6  24 6050.74 1501.64   1
  -6  12 -27 44491.7 4387.88   4
   6   6 -27 63329.9 5051.80   4
  -6  -6  27 46778.9 3956.28   1
   6 -12  27 57979.1 4626.42   1
  12  -7  28 40471.0 3652.41   1
  12  -7  25 91950.8 5077.53   1
  -7  12 -25 87355.6 5979.44   4
   7   5 -25 100728. 6130.01   4
  -7  -5  25 89070.4 5164.93   1
 -12   7 -25 82676.4 4748.81   4
   7 -12  25 90319.3 5570.38   1
  -7  12 -22 44725.0 4133.19   4
  12  -7  22 46146.2 3327.12   1
   7   5 -22 59841.0 4479.77   4
 -12   7 -22 48582.4 3465.72   4
  -7  -5  22 44306.6 3367.78   1
   7 -12  22 50115.4 3836.00   1
  -7  -5  22 50430.2 3639.41   3
  12  -7  19 91195.7 4427.97   1
   7   5 -19 101853. 5533.26   4
 -12   7 -19 92114.7 4542.90   4
   5 -12 -19 90758.5 4000.90   2
  -7  -5  19 96221.5 4622.78   1
   7 -12  19 89224.0 4870.84   1
  -5  -7 -19 87258.7 4340.27   2
  -7  -5  19 97879.5 4998.79   3
  -7  12 -19 90703.7 5631.38   4
 -12   7 -16 103007. 4567.20   4
  -7  -5  16 102213. 4645.23   1
  12  -7  16 109728. 4549.34   1
  -7  12 -16 113623. 5964.85   4
   5 -12 -16 108268. 4493.33   2
   7   5 -16 122637. 5880.63   4
  -7  -5  16 100970. 5003.81   3
   7 -12  16 108816. 5108.54   1
 -12   5  16 110455. 4417.57   3
  12  -7  13 181526. 5885.59   1
 -12   7 -13 176639. 5901.36   4
  -7  -5  13 180442. 6284.72   1
   7 -12  13 186634. 5697.09   2
   7 -12  13 180606. 6607.43   1
  -7  12 -13 171570. 7187.85   4
  -7  -5  13 190023. 6940.46   3
  -5  -7 -13 186957. 6125.33   3
   5 -12 -13 187666. 6303.91   2
 -12   5  13 182928. 5851.31   3
   5 -12 -10 90682.6 4156.33   2
  12  -7  10 95632.7 3586.80   1
  -7  12 -10 86531.2 4437.52   4
  -7  -5  10 94513.2 4510.11   3
   7 -12  10 86922.8 4133.35   1
 -12   7 -10 97385.1 3793.09   4
   7 -12  10 98081.9 3834.31   2
  -5  -7 -10 96298.4 4230.89   3
   5 -12  -7 65321.5 3463.00   2
  12  -7   7 63474.9 2544.80   1
  -7  12  -7 60552.2 3426.47   4
   7 -12   7 57878.6 3015.04   2
  -5  -7  -7 60298.6 3388.13   3
  -7  -5   7 63189.6 3588.41   3
  12  -7   4 60270.2 2167.69   1
  -7  12  -4 62869.7 3231.39   4
   7 -12   4 65075.3 3169.50   2
   7   5  -4 57393.6 2982.16   4
   5 -12  -4 56815.8 3247.45   2
  -5  -7  -4 62482.9 3457.78   3
  -7  -5   4 60471.7 3467.13   3
 -12   5   1 9498.29 541.955   1
   5 -12  -1 10933.2 1429.18   2
  -5  -7  -1 9148.11 1384.62   3
  -7  -5   1 10699.3 1579.45   3
   5   7   1 10140.5 812.115   4
   7   5  -1 10343.0 1026.74   4
  12  -7   1 10476.2 649.987   1
   7 -12   1 10258.0 1313.80   2
   5 -12   2 1951.10 773.409   2
  -5  -7   2 93.8794 833.538   3
  -7  -5  -2 1059.05 883.034   3
  -5  12  -2 561.982 655.310   4
   7   5   2 635.455 292.470   4
   5   7  -2 47.8783 437.949   4
   7 -12  -2-180.366 831.972   2
   5 -12   5 4315.28 969.734   2
  -5  -7   5 4751.37 1181.75   3
  -7  -5  -5 4553.25 1030.13   3
   5   7  -5 4385.57 976.639   4
  -5  12  -5 4304.45 965.421   4
   7 -12  -5 4508.67 1059.25   2
  -5  -7   8 7661.21 1419.83   3
  -7  -5  -8 9098.32 1319.04   3
  -5  12  -8 10222.8 1591.48   4
   5   7  -8 9417.80 1470.84   4
   7 -12  -8 9198.46 1294.87   2
   5 -12   8 9638.59 1263.16   2
   5 -12  11 70044.2 3766.15   1
 -12   5 -11 67535.1 2911.86   4
   5   7 -11 66066.5 3974.31   4
  -5  12 -11 67144.1 3985.41   4
  12  -5  11 69771.5 3088.28   1
   5 -12  11 73410.6 3240.16   2
  -5  -7  11 68841.9 3981.33   3
   7 -12 -11 71382.2 3453.56   2
  -7  -5 -11 71016.3 3501.48   3
 -12   5 -14 42745.3 2424.84   4
  -5  -7  14 45105.2 2997.42   1
  12  -5  14 49997.6 2771.17   1
   5 -12  14 49578.4 3291.48   1
   5 -12  14 48145.1 2497.50   2
   7 -12 -14 49907.1 2810.00   2
   5   7 -14 47642.8 3631.01   4
  -5  -7  14 47757.6 3349.29   3
  -7  -5 -14 48941.0 2780.66   3
  -5  12 -14 52902.0 3851.71   4
   7 -12 -17 36254.4 2366.94   2
  12  -5  17 32488.0 2462.97   1
  -5  -7  17 33820.9 2719.42   1
   5   7 -17 34650.0 3297.96   4
 -12   5 -17 37437.5 2421.22   4
  -5  12 -17 35235.4 3369.61   4
  -5  -7  17 39056.3 3058.60   3
   5 -12  17 41153.3 3153.00   1
 -12   7  17 40308.5 2368.33   3
 -12   5 -20 53712.4 3202.89   4
  12  -5  20 58647.7 3573.97   1
   7 -12 -20 58473.6 2989.95   2
   5   7 -20 70119.7 4779.13   4
  -5  -7  20 60251.9 3843.64   1
   5 -12  20 57950.5 4029.49   1
  -5  -7  20 60184.4 3955.96   3
  -5  12 -20 52647.4 4408.48   4
   5   7 -23 86283.8 5628.84   4
  -5  -7  23 79006.3 4754.74   1
   5 -12  23 78276.4 4958.47   1
  -5  12 -23 78146.5 5615.56   4
  -5  12 -26 40300.5 4198.37   4
   5   7 -26 42944.5 4095.26   4
  -5  -7  26 32135.3 3250.11   1
   5 -12  26 38293.4 3678.80   1
  -5  -7  29 68526.2 5053.03   1
  12  -8  26 31886.7 3057.07   1
 -12   8 -26 23861.2 2774.18   4
  -8  12 -26 28683.8 3458.03   4
   8   4 -26 34775.8 3718.63   4
   8 -12  26 29803.9 3295.66   1
  12  -8  23 30085.0 2804.29   1
   8   4 -23 35271.8 3517.99   4
  -8  -4  23 23173.2 2460.28   1
 -12   8 -23 26539.5 2687.00   4
   8 -12  23 25482.0 2883.71   1
  -8  12 -23 24690.8 3241.21   4
  -8  -4  20 15166.0 2021.00   3
 -12   8 -20 14345.3 1899.56   4
  12  -8  20 15879.2 1884.85   1
  -4  -8 -20 15008.1 1714.61   2
  -8  -4  20 13255.5 1741.62   1
   8 -12  20 12844.9 1922.54   1
  -8  12 -20 14689.5 2432.63   4
   8   4 -20 15290.1 2346.33   4
   4 -12 -20 15273.0 1599.05   2
  12  -8  17 75613.5 3842.79   1
  -8  12 -17 67640.5 4698.11   4
   8 -12  17 80682.6 4361.02   1
  -8  -4  17 78069.2 3902.45   1
  -4  -8 -17 69545.1 3915.08   2
  -8  -4  17 79103.8 4385.50   3
   4 -12 -17 77973.7 3754.93   2
 -12   8 -17 82123.9 4161.05   4
 -12   4  17 83334.7 3906.05   3
  12  -8  14 187329. 6238.77   1
  -8  12 -14 202469. 7712.80   4
  -8  -4  14 199317. 6530.39   1
   8 -12  14 187419. 6831.13   1
   4 -12 -14 193130. 6604.58   2
 -12   8 -14 196317. 6602.16   4
  -4  -8 -14 195429. 6286.92   3
  -8  -4  14 190807. 7048.71   3
 -12   4  14 191450. 6283.63   3
  12  -8  11 148479. 4987.98   1
 -12   8 -11 149014. 5233.30   4
   8 -12  11 144992. 4950.49   2
   8 -12  11 152841. 5642.65   1
   4 -12 -11 153121. 5749.80   2
  -4  -8 -11 148746. 5508.72   3
  -8  -4  11 150009. 5931.27   3
  -8  12 -11 148753. 6028.03   4
 -12   4  11 147997. 5159.53   3
  12  -8   8 100322. 3588.27   1
   4 -12  -8 105323. 4669.40   2
   8 -12   8 98672.0 4262.83   1
  -8  12  -8 99449.0 4561.93   4
   8 -12   8 102511. 3992.32   2
  -4  -8  -8 104092. 4554.13   3
  -8  -4   8 103241. 4659.54   3
  12  -8   5 34264.9 1678.66   1
   8 -12   5 29632.1 2096.72   2
   4 -12  -5 31349.9 2558.90   2
  -8  12  -5 33759.4 2382.62   4
  -4  -8  -5 31545.7 2480.30   3
  -8  -4   5 29800.9 2441.85   3
  12  -8   2 150763. 3995.32   1
   8 -12   2 153433. 5390.28   2
 -12   4   2 164075. 3529.36   1
  -8  12  -2 157678. 5430.51   4
   4 -12  -2 149264. 5797.68   2
   4   8   2 159126. 4000.22   4
  -4  -8  -2 149098. 5980.14   3
  -8  -4   2 157169. 5895.62   3
  -4  12  -1 64138.1 3038.43   4
  12  -8  -1 66427.2 1681.00   1
   4   8  -1 64547.6 2654.22   4
   8 -12  -1 60890.4 3199.22   2
   4 -12   1 61423.3 3432.10   2
 -12   4  -1 59116.0 2085.45   1
  -4  -8   1 62363.3 3688.02   3
  -8  -4  -1 63520.6 3409.86   3
  -4  -8   4 63258.6 3712.41   3
   4   8  -4 62616.5 3049.57   4
  -4  12  -4 55757.5 3087.38   4
   8 -12  -4 64526.5 3237.75   2
   4 -12   4 61365.7 3288.94   2
  -8  -4  -4 62709.9 3336.32   3
   4 -12   7 6920.85 1100.82   2
  -4  -8   7 10599.1 1608.23   3
  -8  -4  -7 8306.00 1297.29   3
  -4  12  -7 8985.89 1449.61   4
   4   8  -7 8202.78 1352.27   4
   8 -12  -7 6819.78 1217.64   2
   4 -12  10 1013.46 586.784   2
  -4  -8  10 120.709 828.363   3
  -8  -4 -10 483.878 660.045   3
  -4  12 -10 1947.36 1084.14   4
   4   8 -10 676.973 847.398   4
   8 -12 -10 344.306 643.351   2
  -4  -8  13 23724.9 2473.93   3
   4 -12  13 26955.2 1898.62   2
  -4  -8  13 25671.0 2286.62   1
   4 -12  13 25603.6 2446.91   1
   8 -12 -13 22968.4 1947.62   2
  -4  12 -13 27175.1 2708.87   4
   4   8 -13 26451.8 2600.05   4
 -12   4 -13 24484.2 1657.49   4
  -8  -4 -13 24928.2 1984.61   3
  -4  -8  16 25235.3 2529.59   3
  -4  -8  16 27715.8 2515.95   1
 -12   4 -16 26249.9 1868.63   4
   8 -12 -16 23328.5 1922.68   2
   4 -12  16 25006.4 1742.59   2
   4   8 -16 22906.4 2716.04   4
   4 -12  16 24646.2 2478.11   1
  -8  -4 -16 23805.1 1918.91   3
  -4  12 -16 26223.4 2893.74   4
 -12   4 -19 45901.5 2727.44   4
  -4  12 -19 42661.4 3865.56   4
  -4  -8  19 46136.7 3358.68   1
   4   8 -19 47572.6 3898.52   4
   4 -12  19 40534.8 3296.69   1
   8 -12 -19 42349.8 2556.34   2
  -4  12 -22 42678.6 4075.00   4
   4   8 -22 42507.7 3887.42   4
  -4  -8  22 41682.3 3406.35   1
   4 -12  22 46044.7 3689.56   1
  -4  12 -25 68782.0 5415.34   4
   4   8 -25 72931.3 5320.17   4
  -4  -8  25 72480.4 4812.87   1
   4 -12  25 70746.9 5009.36   1
  -4  -8  28 42068.8 3915.38   1
  -9  12 -27 179155. 8949.21   4
  12  -9  27 195761. 8254.70   1
   9   3 -27 208252. 9223.17   4
 -12   9 -27 180064. 8109.96   4
   9 -12  27 203238. 8909.42   1
  12  -9  24 278297. 9545.77   1
  -9  12 -24 231879. 10260.4   4
 -12   9 -24 248452. 9644.11   4
   9   3 -24 294091. 10627.0   4
   9 -12  24 256035. 9911.59   1
  12  -9  21 212492. 7666.01   1
 -12   9 -21 204396. 8081.14   4
  -9  12 -21 199214. 8832.87   4
  -9  -3  21 199913. 7307.86   1
   3 -12 -21 202103. 6696.09   2
  -9  -3  21 218588. 8061.65   3
   9 -12  21 203018. 8075.60   1
  12  -9  18 101024. 4715.54   1
 -12   9 -18 109485. 5269.57   4
  -9  12 -18 107042. 5825.97   4
   3 -12 -18 103311. 4498.36   2
  -3  -9 -18 94310.8 4643.66   2
  -9  -3  18 97600.8 4447.14   1
   9 -12  18 103509. 5158.48   1
  -9  -3  18 104929. 5120.45   3
 -12   3  18 109417. 4832.29   3
  12  -9  15 55760.5 3174.19   1
   3 -12 -15 61131.3 3412.90   2
 -12   9 -15 61551.0 3505.07   4
  -9  12 -15 62581.4 4104.95   4
  -3  -9 -15 58349.7 2904.29   3
  -9  -3  15 55311.7 3071.96   1
   9 -12  15 56087.4 3432.13   1
  -3  -9 -15 55113.5 3479.28   2
  -9  -3  15 59582.3 3701.85   3
 -12   3  15 60478.2 3308.06   3
  -3  -9 -12 42926.3 2642.52   3
 -12   9 -12 39262.1 2611.01   4
   3 -12 -12 44326.8 2938.57   2
   9 -12  12 35970.6 2608.61   1
  -9  12 -12 38370.8 2980.37   4
  -9  -3  12 42187.1 2499.11   1
  -9  -3  12 39767.0 2828.69   3
  12  -9  12 38199.7 2392.02   1
 -12   3  12 38898.5 2517.67   3
  -3  -9  -9 13985.5 1677.40   3
   3 -12  -9 12245.1 1718.71   2
  -9  -3   9 15349.8 1790.38   3
 -12   3   9 10291.2 1393.40   3
  -9  12  -9 11366.3 1615.97   4
   9 -12   9 10442.8 1399.28   1
   9 -12   9 11876.3 1319.58   2
 -12   3   9 11811.0 611.127   1
  12  -9   9 14552.7 1314.69   1
 -12   9  -9 11580.4 1384.18   4
  -3  -9  -6 10034.3 1514.13   3
   3 -12  -6 9994.01 1474.13   2
  -9  -3   6 10949.2 1516.58   3
  -9  12  -6 10555.2 1407.38   4
   9 -12   6 8317.63 1159.80   1
  12  -9   6 10000.8 1022.12   1
   9 -12   6 11623.5 1376.44   2
 -12   3   6 8269.82 439.744   1
 -12   3   3 15696.3 738.717   1
  -3  -9  -3 15755.3 1859.36   3
   3 -12  -3 14714.5 1856.56   2
  -9  -3   3 17150.7 1766.36   3
  -9  12  -3 18315.0 1749.75   4
  12  -9   3 17876.1 1136.65   1
   9 -12   3 14833.0 1566.37   2
   3   9   0 150403. 4317.39   4
  -3  -9   0 142192. 5890.80   3
   3 -12   0 135118. 5589.90   2
  12  -9   0 140315. 3574.80   1
  -3  12   0 141104. 4790.23   4
  -9  -3   0 142645. 5429.91   3
 -12   3   0 140973. 3693.30   1
   9 -12   0 137893. 5108.17   2
  -3  12  -3 348757. 9526.33   4
   3   9  -3 354879. 9243.77   4
   9 -12  -3 356147. 9685.24   2
   3 -12   3 364796. 10210.1   2
  12  -9  -3 360776. 7162.43   1
  -3  -9   3 354857. 10778.4   3
  -9  -3  -3 361355. 10015.0   3
   3   9  -6 267907. 8079.59   4
   9 -12  -6 260325. 7822.26   2
   3 -12   6 272609. 8098.89   2
  -3  -9   6 278340. 8995.62   3
  -3  12  -6 260890. 8064.56   4
  -9  -3  -6 257837. 7952.46   3
  -3  12  -9 312253. 9594.68   4
   3   9  -9 308924. 9554.13   4
   3 -12   9 312595. 8768.18   2
  -3  -9   9 303998. 9763.85   3
   9 -12  -9 304164. 8661.55   2
  -9  -3  -9 298159. 8736.37   3
   3 -12  12 229844. 8042.61   1
  -3  12 -12 260191. 8902.88   4
   9 -12 -12 236411. 7260.75   2
   3   9 -12 231770. 8610.12   4
   3 -12  12 240894. 7105.08   2
  -3  -9  12 249673. 8589.69   3
  -9  -3 -12 239000. 7407.69   3
   3 -12  15 342222. 10652.0   1
  -3  -9  15 355782. 10578.0   1
   9 -12 -15 345387. 9394.33   2
   3   9 -15 328143. 11298.0   4
   3 -12  15 344926. 9062.58   2
  -3  12 -15 356563. 11843.6   4
  -3  -9  15 358821. 10992.7   3
  -3  -9  15 356840. 9799.74   2
 -12   3 -15 340010. 8650.68   4
  -9  -3 -15 352790. 9590.40   3
   9 -12 -18 210796. 6607.11   2
  -3  12 -18 219443. 9152.16   4
  -3  -9  18 218431. 7963.97   1
   3 -12  18 212369. 8085.91   1
   3   9 -18 218303. 8976.03   4
  -3  -9  21 257511. 9291.81   1
  -3  12 -21 241333. 10387.4   4
   3   9 -21 273950. 10597.5   4
   3 -12  21 260660. 9528.83   1
  -3  12 -24 107243. 6824.72   4
   3   9 -24 125487. 7096.02   4
  -3  -9  24 113439. 6118.92   1
   3 -12  24 118689. 6352.82   1
  -3  12 -27 72840.3 5645.24   4
  -3  -9  27 62397.7 4789.92   1
   3 -12  27 77379.9 5389.17   1
   3   9 -27 76411.3 5554.85   4
 -12  10 -28 1998.65 1143.57   4
 -10  12 -28 1715.88 1520.91   4
  10 -12  25 4730.48 1620.53   1
 -10  12 -25 3877.04 1566.06   4
 -12  10 -25 4280.54 1551.74   4
  12 -10  25 3023.70 1357.72   1
 -10  12 -22 11116.6 2222.10   4
  12 -10  22 8049.39 1624.12   1
  10 -12  22 12365.6 2164.68   1
 -12  10 -22 4885.10 1575.45   4
   2 -12 -19 13241.9 1638.11   2
 -10  -2  19 15738.8 2025.77   3
  -2 -10 -19 13599.9 1746.03   2
 -12   2  19 12162.0 1730.72   3
 -10  -2  19 15208.6 1669.97   1
  12 -10  19 13093.7 1801.94   1
 -12  10 -19 7645.36 1644.39   4
 -10  12 -19 14117.1 2272.39   4
  10 -12  19 13484.2 1983.60   1
  12 -10  16 21517.5 2115.41   1
  10 -12  16 25355.9 2404.83   1
 -12  10 -16 26102.8 2459.81   4
   2 -12 -16 27170.4 2341.60   2
 -10  12 -16 18053.8 2218.92   4
 -10  -2  16 27791.4 2098.86   1
  -2 -10 -16 27714.3 2472.48   2
 -10  -2  16 28472.3 2539.07   3
 -12   2  16 25006.1 2206.40   3
  -2 -10 -13 14466.8 1479.62   3
   2 -12 -13 19697.1 2065.61   2
  10 -12  13 18693.1 1910.21   1
 -10  -2  13 15850.5 1880.85   3
 -12   2  13 18142.3 1819.31   3
  -2 -10 -13 16423.7 2027.24   2
 -12  10 -13 16612.6 1871.46   4
 -10  12 -13 17271.1 2019.50   4
 -10  -2  13 14994.3 1428.95   1
  12 -10  13 16078.5 1681.14   1
  10 -12  10 141448. 5302.19   1
   2 -12 -10 152652. 6140.95   2
 -12   2  10 156655. 3923.41   1
 -12  10 -10 153981. 5568.09   4
  -2 -10 -10 147526. 5664.50   3
  12 -10  10 146148. 5079.98   1
 -10  -2  10 156414. 5908.75   3
 -12   2  10 149819. 5459.66   3
 -10  12 -10 140593. 5820.03   4
  10 -12   7 92681.1 3781.04   1
  10 -12   7 87968.9 3774.47   2
   2 -12  -7 93526.1 4629.55   2
  12 -10   7 88878.6 3405.94   1
  -2 -10  -7 97344.7 4488.42   3
 -12   2   7 84666.6 2545.83   1
 -10  12  -7 86864.3 4064.03   4
 -10  -2   7 83011.7 4114.00   3
 -12   2   7 86919.2 3908.76   3
 -12   2   4 123006. 4677.54   3
  10 -12   4 115220. 4230.14   1
   2 -12  -4 111500. 5270.06   2
  12 -10   4 125076. 3808.64   1
  10 -12   4 116327. 4506.91   2
 -10  12  -4 120722. 4738.63   4
  -2 -10  -4 118979. 5320.50   3
 -10  -2   4 121073. 5003.21   3
  -2  12   1 106625. 3896.30   4
   2  10   1 112836. 3536.78   4
  10 -12   1 109324. 4357.17   2
  12 -10   1 100749. 3136.30   1
   2 -12  -1 112875. 5107.67   2
  -2 -10  -1 106942. 5079.78   3
 -10  -2   1 107682. 4578.92   3
  -2  12  -2 248528. 7290.67   4
  12 -10  -2 254301. 5660.09   1
  10 -12  -2 242754. 7487.00   2
   2 -12   2 254613. 8264.15   2
   2  10  -2 246190. 6921.00   4
  -2 -10   2 238043. 8492.14   3
 -10  -2  -2 256773. 7780.31   3
   2 -12   5 57366.8 3340.53   2
   2  10  -5 56295.1 3007.15   4
  10   2   5 51875.6 1737.04   4
  10 -12  -5 54306.9 3010.38   2
  -2 -10   5 55212.9 3638.63   3
  12 -10  -5 57036.5 1629.08   1
  -2  12  -5 59142.1 3136.02   4
 -10  -2  -5 54298.9 3040.31   3
  10 -12  -8 138202. 5204.44   2
  -2  12  -8 150122. 5919.32   4
   2  10  -8 144253. 5772.14   4
   2 -12   8 155987. 5593.83   2
  -2 -10   8 147278. 6314.64   3
 -10  -2  -8 141595. 5326.30   3
  10 -12 -11 35992.0 2385.06   2
  -2  12 -11 40937.2 3198.01   4
   2  10 -11 36716.9 3021.13   4
   2 -12  11 37153.3 2445.00   2
  -2 -10  11 35374.0 3006.51   3
  -2 -10  11 37211.3 2684.99   2
 -10  -2 -11 35478.8 2416.65   3
  -2 -10  14 34656.9 2835.33   1
  10 -12 -14 30724.4 2210.83   2
   2 -12  14 36619.1 2971.17   1
  -2  12 -14 29068.8 3041.69   4
   2  10 -14 31092.1 3041.80   4
   2 -12  14 33213.7 2218.26   2
  -2 -10  14 32524.5 2380.17   2
 -10  -2 -14 30090.0 2224.15   3
  -2  12 -17 1837.97 1464.21   4
 -10  -2 -17 1284.60 724.384   3
   2 -12  17 2976.46 1377.78   1
  -2 -10  17 488.422 1029.70   1
   2  10 -17-523.756 1325.50   4
  -2  12 -20 6586.95 1760.12   4
   2  10 -20 5258.80 1952.96   4
  -2 -10  20 7640.09 1710.82   1
   2 -12  20 4415.55 1413.25   1
  -2 -10  23 13108.2 2215.39   1
   2 -12  23 8666.84 2002.40   1
  -2  12 -23 5252.15 1682.33   4
   2  10 -23 9883.50 2099.95   4
   2 -12  26 11152.5 2299.71   1
  -2 -10  26 13697.5 2244.75   1
  -2  12 -26 11300.4 2575.10   4
   2  10 -26 7577.71 1913.07   4
  11 -12  26 6318.77 1695.97   1
 -12  11 -26 6375.92 1781.01   4
 -11  12 -26 15232.1 2561.97   4
  12 -11  26 13002.9 2165.31   1
  11 -12  23 4991.36 1569.36   1
  12 -11  23 7001.69 1696.97   1
 -11  12 -23 3709.67 1489.23   4
 -12  11 -23 4033.71 1450.01   4
   1 -12 -20 5647.82 1173.13   2
  -1 -11 -20 7719.22 1433.16   2
 -11  -1  20 6944.78 1452.73   3
 -12   1  20 7919.55 1511.28   3
  12 -11  20 4966.48 1355.70   1
 -12  11 -20 5794.77 1690.06   4
 -11  12 -20 2391.39 1171.86   4
  11 -12  20 7803.19 1727.58   1
   1 -12 -17 7489.69 1379.56   2
 -11  -1  17 5811.74 1438.42   3
  -1 -11 -17 8333.47 1501.94   2
 -12   1  17 6424.99 1328.73   3
  11 -12  17 5717.61 1334.63   1
 -12  11 -17 7082.21 1469.34   4
  12 -11  17 4530.77 1184.78   1
 -11  12 -17 5061.26 1478.17   4
   1 -12 -14 1918.62 1024.80   2
 -11  -1  14 4158.89 1143.66   3
  -1 -11 -14 2244.66 870.602   2
 -12   1  14 2972.48 992.573   3
 -11  12 -14-216.367 1066.82   4
  11 -12  14 3498.08 1011.80   1
  12 -11  14 1760.89 902.816   1
 -12  11 -14 1301.98 908.250   4
 -11  -1  14 1989.62 640.352   1
 -12   1  11 18054.5 1180.80   1
   1 -12 -11 19696.2 2190.51   2
  11 -12  11 17629.1 1740.26   1
 -11  -1  11 17132.6 1890.04   3
  -1 -11 -11 18243.8 2120.26   2
 -12   1  11 17564.4 1805.82   3
 -11  -1  11 17703.0 1451.45   1
 -11  12 -11 19795.3 2074.85   4
 -12  11 -11 20599.4 2033.39   4
  12 -11  11 17796.4 1729.08   1
 -11  12  -8 61585.8 3391.58   4
  11 -12   8 59376.1 2953.42   1
 -12  11  -8 59301.7 3298.21   4
 -12   1   8 56362.2 2243.57   1
   1 -12  -8 61907.4 3872.19   2
  12 -11   8 61517.2 2874.32   1
  -1 -11  -8 63542.4 3555.78   3
  -1 -11  -8 57936.4 3846.52   2
 -11  -1   8 58029.4 3350.15   3
 -12   1   8 57031.8 3223.50   3
  12 -11   5 110523. 3763.78   1
  -1 -11  -5 108688. 5023.47   3
  11 -12   5 98205.9 3830.03   1
   1 -12  -5 110977. 5384.20   2
  -1 -11  -5 115544. 5563.44   2
 -11  -1   5 106471. 4603.17   3
 -12   1   5 107704. 4492.08   3
 -12   1   2 67065.0 3384.78   3
 -11  -1   2 61232.4 3362.33   3
  11 -12   2 62139.5 2725.38   1
  11 -12   2 66312.3 3301.61   2
  12 -11   2 61154.4 2434.92   1
   1 -12  -2 62212.0 3856.43   2
  -1 -11  -2 55145.2 3602.44   3
   1  11   2 63936.9 2557.91   4
   1  11  -1 105069. 3835.56   4
  11 -12  -1 107395. 4344.08   2
  12 -11  -1 99440.1 3107.43   1
   1 -12   1 98591.9 4887.73   2
  -1  12  -1 105771. 4006.60   4
  -1 -11   1 101556. 5051.58   3
 -11  -1  -1 97097.1 4341.47   3
  -1  12  -4 142188. 5222.60   4
  11 -12  -4 139847. 5242.84   2
   1  11  -4 149947. 5215.81   4
  -1 -11   4 149620. 6372.96   3
  -1 -11   4 145926. 6198.86   2
   1 -12   4 147938. 6016.05   2
 -11  -1  -4 146604. 5453.46   3
  11 -12  -7 112028. 4542.80   2
   1  11  -7 120993. 5012.58   4
  -1  12  -7 116090. 4974.49   4
   1 -12   7 113766. 4995.13   2
  -1 -11   7 113920. 5489.88   3
  -1 -11   7 114775. 5194.52   2
 -11  -1  -7 104754. 4519.33   3
  11 -12 -10 100847. 4283.42   2
  -1  12 -10 99320.4 5040.10   4
   1  11 -10 111164. 5183.22   4
   1 -12  10 108144. 4587.58   2
  -1 -11  10 104278. 4732.31   2
 -11  -1 -10 102044. 4393.99   3
   1 -12  13 116973. 5476.03   1
  -1  12 -13 123019. 6003.25   4
   1  11 -13 119675. 5889.99   4
   1 -12  13 117529. 4695.66   2
  -1 -11  13 117366. 4875.68   2
 -11  -1 -13 123131. 4814.92   3
  -1 -11  16 29620.3 2782.37   1
   1 -12  16 29493.0 2143.28   2
  -1  12 -16 26266.2 2931.91   4
   1  11 -16 25503.0 2773.63   4
  -1 -11  16 29146.8 2161.57   2
   1 -12  16 28352.4 2749.67   1
 -11  -1 -16 29887.9 2234.57   3
  -1  12 -19 3269.33 1462.56   4
  -1 -11  19 6958.37 1708.14   1
   1 -12  19 4194.49 1536.76   1
  -1 -11  22 740.818 1168.26   1
   1 -12  22 1648.72 1438.18   1
   1  11 -22 272.610 1316.80   4
  -1  12 -22 1166.59 1452.82   4
  -1 -11  25 2046.23 1568.20   1
   1 -12  25 2406.06 1482.68   1
  -1  12 -25 1811.32 1398.32   4
   1  11 -25 3287.69 1998.86   4
 -12  12 -27 39813.6 4026.11   4
  12 -12  24 136308. 6609.18   1
 -12  12 -24 117860. 6761.32   4
 -12  12 -21 199345. 8624.72   4
   0 -12 -21 201093. 7200.30   2
  12 -12  21 208380. 8122.97   1
   0 -12 -18 265652. 9008.58   2
 -12  12 -18 286269. 10165.0   4
  12 -12  18 278573. 9348.62   1
 -12  12 -15 276216. 9434.40   4
   0 -12 -15 264311. 9025.66   2
  12 -12  15 277774. 8759.30   1
 -12   0  15 281129. 8989.22   3
 -12  12 -12 234617. 8029.36   4
   0 -12 -12 223176. 8306.32   2
 -12   0  12 244166. 7965.42   3
  12 -12  12 234807. 7457.23   1
  12 -12   9 329781. 8885.69   1
 -12   0   9 317558. 7983.61   1
 -12  12  -9 320590. 9475.37   4
   0 -12  -9 322077. 10483.9   2
 -12   0   9 322946. 9544.20   3
  12 -12   6 229074. 6679.64   1
   0 -12  -6 249533. 8843.69   2
 -12   0   6 244477. 7752.40   3
  12 -12   3 160359. 4916.75   1
   0 -12  -3 168322. 6991.68   2
 -12   0   3 166351. 5951.25   3
   0  12   0 69803.4 2999.44   4
  12 -12   0 65776.7 2624.79   1
 -12   0   0 72430.8 3595.90   3
 -12   0  -3 121791. 4920.58   3
   0  12  -3 116071. 4495.57   4
   0 -12   3 118272. 5553.94   2
   0 -12   6 10524.4 1661.71   2
 -12   0  -6 12154.0 1551.83   3
   0  12  -6 10720.1 1449.62   4
 -12   0  -9 24248.6 2084.37   3
   0  12  -9 24049.4 2421.72   4
   0 -12   9 22423.6 2190.65   2
 -12   0 -12 60056.3 3277.31   3
   0  12 -12 56195.7 3953.04   4
   0 -12  12 58611.3 3307.11   2
 -12   0 -15 58837.4 3256.17   3
   0 -12  15 53698.2 3741.94   1
   0  12 -15 55254.2 4174.88   4
   0 -12  15 58560.9 3159.67   2
   0  12 -18 105641. 6196.74   4
   0 -12  18 103140. 5489.42   1
 -12   0 -18 113041. 4648.91   3
   0  12 -21 200946. 9330.23   4
   0 -12  21 215819. 8625.16   1
   0  12 -24 159464. 8412.99   4
   0 -12  24 155686. 7499.74   1
  -7  13 -26 152634. 8304.59   4
  13  -7  26 155873. 7037.33   1
   7   6 -26 168167. 8206.56   4
  -7  -6  26 145968. 7110.00   1
   7 -13  26 152943. 7705.27   1
 -13   7 -23 134550. 6000.51   4
  -7  13 -23 118562. 7171.51   4
  13  -7  23 147630. 6349.62   1
   7   6 -23 164663. 7775.23   4
  -7  -6  23 137352. 6389.57   1
   7 -13  23 138182. 6892.93   1
  13  -7  20 93548.9 4641.57   1
  -7  13 -20 89790.4 5816.68   4
 -13   7 -20 91993.8 4607.57   4
   6 -13 -20 92951.1 4128.59   2
   7   6 -20 106287. 5915.92   4
  -7  -6  20 90243.8 4770.30   1
   7 -13  20 94670.2 5233.66   1
  -7  -6  20 95476.5 5158.73   3
  13  -7  17 42418.6 2849.73   1
   7   6 -17 51064.3 3942.60   4
 -13   7 -17 45750.4 2919.80   4
  -7  13 -17 52000.3 4073.36   4
   6 -13 -17 46927.6 2870.98   2
  -7  -6  17 48439.4 3176.39   1
   7 -13  17 50006.5 3509.67   1
  -7  -6  17 46988.4 3471.70   3
 -13   6  17 48902.1 2900.15   3
  -7  13 -14 56306.6 3974.39   4
  13  -7  14 49927.0 2861.53   1
  -7  -6  14 53382.9 3207.33   1
   7 -13  14 52083.4 2724.78   2
   7   6 -14 50526.1 3666.28   4
   7 -13  14 45599.0 3251.10   1
   6 -13 -14 53834.1 3130.39   2
  -7  -6  14 50576.3 3469.53   3
  -6  -7 -14 53932.8 3056.86   3
 -13   7 -14 51523.8 2882.35   4
 -13   6  14 52187.9 2868.94   3
  -7  -6  11 17651.5 2100.98   3
  -6  -7 -11 19445.0 1880.69   3
  13  -7  11 17200.6 1496.42   1
  -7  13 -11 15127.8 2084.42   4
   7 -13  11 20410.1 2070.71   1
   7   6 -11 16970.1 2035.33   4
   7 -13  11 15578.2 1562.57   2
   6 -13 -11 16626.8 1767.71   2
  13  -7   8 28365.4 1699.73   1
   7   6  -8 26462.2 2314.18   4
  -7  13  -8 24612.6 2320.46   4
  -7  -6   8 25480.6 2416.94   3
   7 -13   8 28683.0 2098.95   2
   6 -13  -8 27359.3 2262.69   2
   7 -13   8 29756.6 2346.84   1
  -6  -7  -8 26819.1 2266.72   3
   6 -13  -5 2256.30 887.267   2
  -7  -6   5 5472.37 1368.20   3
  -6  -7  -5 4614.72 1148.47   3
  -7  13  -5 3353.94 912.767   4
   7   6  -5 5250.09 1008.47   4
  13  -7   5 6396.79 758.381   1
   7 -13   5 3873.37 1000.29   2
   6   7   2 28178.6 1179.78   4
   6 -13  -2 24894.3 2196.57   2
   7   6  -2 25357.8 1794.51   4
   7 -13   2 28844.1 2229.95   2
  -7  13  -2 24871.4 2049.80   4
  -6  -7  -2 24195.4 2282.21   3
  -7  -6   2 24274.0 2268.77   3
   7 -13  -1 93380.8 4227.41   2
   6   7  -1 93195.2 3347.96   4
 -13   6  -1 87339.1 2665.28   1
   6 -13   1 90203.1 4154.19   2
   7   6   1 89002.7 2849.24   4
  -6  -7   1 86414.9 4445.16   3
  -7  -6  -1 97761.1 4531.68   3
  -6  13  -1 94227.2 3982.87   4
   7 -13  -4 111834. 4791.79   2
  -6  13  -4 115620. 4677.18   4
   6   7  -4 114805. 4393.10   4
   6 -13   4 113866. 4675.62   2
  -6  -7   4 109947. 5086.44   3
  -7  -6  -4 107989. 4872.34   3
  -6  13  -7 191422. 6822.71   4
   6 -13   7 195472. 6343.33   2
   6   7  -7 194715. 6735.84   4
   7 -13  -7 195731. 6678.79   2
  -6  -7   7 197008. 7217.12   3
  -7  -6  -7 180057. 6602.16   3
   6 -13  10 89384.7 4396.23   1
  -6  13 -10 90827.1 4648.24   4
  13  -6  10 97172.8 3582.48   1
   6   7 -10 84322.4 4504.97   4
   6 -13  10 90366.6 3881.31   2
   7 -13 -10 91241.1 4169.00   2
  -6  -7  10 92070.8 4730.50   3
  -7  -6 -10 84380.4 4138.21   3
 -13   6 -13 108991. 4141.95   4
  -6  13 -13 116629. 5685.99   4
  13  -6  13 101323. 4135.39   1
   6 -13  13 111401. 5124.23   1
   6 -13  13 106472. 4200.81   2
   7 -13 -13 108050. 4580.15   2
   6   7 -13 107108. 5517.74   4
  -6  -7  13 111554. 5309.38   3
  -7  -6 -13 109738. 4604.88   3
  -6  -7  13 109830. 4848.02   1
  -6  13 -16 106128. 5850.26   4
   6 -13  16 100461. 3970.98   2
  -6  -7  16 106916. 4919.24   1
   7 -13 -16 101947. 4390.31   2
   6   7 -16 104793. 5853.70   4
   6 -13  16 113161. 5321.09   1
  -6  -7  16 108776. 5393.06   3
  -7  -6 -16 93162.8 4097.75   3
 -13   6 -16 99061.7 4182.57   4
 -13   7  16 103663. 4195.59   3
  13  -6  16 99199.5 4352.15   1
 -13   6 -19 148199. 5631.90   4
  -6  13 -19 143807. 7338.87   4
   7 -13 -19 139952. 5262.41   2
   6   7 -19 151561. 7180.79   4
  13  -6  19 131834. 5631.05   1
  -6  -7  19 155864. 6699.05   3
   6 -13  19 140927. 6451.23   1
  -6  -7  19 149220. 6279.35   1
  -6  13 -22 77446.3 5574.02   4
  13  -6  22 83403.2 4514.72   1
   6   7 -22 82346.0 5418.11   4
  -6  -7  22 85079.4 4856.82   1
   6 -13  22 81589.6 5057.27   1
   6   7 -25 80537.3 5540.86   4
  -6  -7  25 67975.3 4624.02   1
   6 -13  25 70700.4 5020.08   1
  -6  -7  28 6151.90 1735.21   1
  13  -8  27 3550.33 1388.73   1
  -8  13 -27 892.826 1333.26   4
  13  -8  24 1720.57 1245.82   1
   8 -13  24 2117.09 1161.52   1
  -8  -5  24 1515.19 1052.18   1
 -13   8 -24 1734.37 1031.76   4
  -8  13 -24 1642.96 1540.45   4
   8   5 -24 3956.54 1774.26   4
  -8  -5  21 1193.78 997.422   3
  -8  -5  21 1945.28 944.672   1
 -13   8 -21 2524.81 1024.03   4
  -8  13 -21 2467.40 1731.67   4
   8   5 -21 4717.46 1634.22   4
   8 -13  21-78.0546 1027.93   1
  13  -8  21 4022.28 1339.94   1
   5 -13 -21 2789.69 869.297   2
  -8  -5  18 3999.87 1214.26   3
   8 -13  18 5920.66 1508.89   1
 -13   5  18 3866.22 931.052   3
  -8  13 -18 7356.40 1899.05   4
  13  -8  18 4905.47 1202.12   1
 -13   8 -18 4470.12 1296.66   4
   8   5 -18 6399.35 1770.97   4
  -8  -5  18 5143.72 1167.04   1
   5 -13 -18 3994.36 1002.86   2
 -13   5  15 19221.3 1813.06   3
 -13   8 -15 17260.1 1780.14   4
  -5  -8 -15 15980.3 1606.45   3
  -8  -5  15 17145.9 2054.21   3
  13  -8  15 17409.6 1766.52   1
   8 -13  15 20287.9 1698.78   2
  -8  13 -15 22902.1 2718.92   4
  -8  -5  15 18572.8 1862.31   1
   8 -13  15 18038.1 2041.81   1
   5 -13 -15 20557.2 1982.13   2
   5 -13 -12 2791.05 1081.77   2
  -5  -8 -12 2894.74 890.083   3
  -8  -5  12 6174.33 1403.29   3
 -13   5  12 4122.76 946.610   3
   8 -13  12 3266.20 859.771   2
  -8  13 -12 4115.21 1298.02   4
   8 -13  12 3855.12 1141.75   1
 -13   8 -12 3102.77 886.167   4
  13  -8  12 3813.73 857.054   1
   5 -13  -9 11088.5 1611.95   2
  -5  -8  -9 11059.3 1515.46   3
  -8  -5   9 10586.0 1647.40   3
  -8  13  -9 11829.2 1665.96   4
   8 -13   9 11393.1 1514.67   1
   8 -13   9 9915.24 1346.58   2
  13  -8   9 11587.4 1153.05   1
   5 -13  -6 236.085 847.867   2
  -5  -8  -6-18.1997 756.629   3
  -8  -5   6-279.430 845.114   3
  -8  13  -6 1304.50 835.017   4
   8 -13   6 889.347 728.511   2
  13  -8   6 1103.09 462.212   1
   5 -13  -3 1836.90 955.588   2
  -5  -8  -3 893.015 850.277   3
  -8  -5   3 1494.46 1010.14   3
  13  -8   3 1866.03 403.698   1
   5   8   3 1351.64 287.031   4
  -8  13  -3 1294.19 797.362   4
   8   5  -3 3246.39 775.739   4
   8 -13   3 1586.78 824.917   2
   5 -13   0 7737.73 1307.98   2
  -5  -8   0 7163.63 1391.57   3
  -8  -5   0 13415.9 1729.73   3
   5   8   0 9988.26 951.282   4
 -13   5   0 8102.24 611.546   1
   8   5   0 9405.12 962.642   4
  -5  13   0 10996.5 1345.18   4
   8 -13   0 10250.2 1426.75   2
   5 -13   3 18955.2 1928.73   2
  -5  -8   3 17688.0 2091.94   3
  -8  -5  -3 21801.5 2068.63   3
   8   5   3 20185.2 808.070   4
   5   8  -3 20292.5 1618.05   4
  -5  13  -3 18783.5 1758.01   4
   8 -13  -3 19109.7 1884.73   2
  -5  -8   6 24883.5 2447.41   3
  -8  -5  -6 19382.0 1967.76   3
  -5  13  -6 23674.0 2102.82   4
   5 -13   6 22887.4 1993.72   2
   5   8  -6 23910.4 2060.26   4
   8 -13  -6 22637.2 2057.41   2
  -5  -8   9 1159.83 1039.60   3
  -8  -5  -9 1684.70 845.826   3
  -5  13  -9 555.935 913.836   4
   5   8  -9 126.871 815.188   4
   8 -13  -9 1005.56 853.486   2
   5 -13   9 633.841 720.133   2
  -5  -8  12 707.264 915.976   3
  -8  -5 -12 275.367 721.749   3
  -5  13 -12 2983.63 1444.21   4
   5   8 -12 1571.71 1140.26   4
   5 -13  12-691.431 1082.12   1
   8 -13 -12 630.430 793.215   2
   5 -13  12 575.819 562.275   2
  -5  -8  15 14451.2 2044.45   3
   5 -13  15 16433.4 1529.73   2
  -5  -8  15 14136.8 1877.59   1
  -8  -5 -15 14217.5 1578.00   3
 -13   5 -15 13048.0 1367.56   4
  -5  13 -15 15537.9 2242.66   4
   5   8 -15 15751.4 2319.58   4
   5 -13  15 13418.4 1885.15   1
   8 -13 -15 13783.3 1586.19   2
  -5  -8  18 722.170 996.897   3
  -5  13 -18-131.334 1189.69   4
 -13   5 -18-118.421 594.961   4
   5   8 -18-1771.05 1510.14   4
  -5  -8  18 1186.88 1109.37   1
   8 -13 -18-546.972 716.845   2
   5 -13  18 525.652 1055.32   1
  -5  -8  21 443.253 1005.07   1
   5 -13  21 828.617 1301.88   1
  -5  13 -21 74.9192 1434.71   4
   5   8 -21 1250.79 1456.89   4
   5 -13  24 820.885 1357.49   1
  -5  -8  24-281.255 1146.69   1
  -5  13 -24 1457.64 1649.46   4
   5   8 -24-867.704 1240.57   4
  -5  -8  27-95.5231 1290.75   1
 -13   9 -25 72.3171 981.536   4
  -9  13 -25 896.442 1327.55   4
   9   4 -25 1439.20 1372.73   4
   9 -13  25 542.991 1368.29   1
  13  -9  25 661.102 1343.01   1
  13  -9  22 2075.07 1092.96   1
  -9  -4  22 1117.78 898.297   1
 -13   9 -22-780.640 1309.89   4
   9   4 -22 1170.46 1464.63   4
  -9  13 -22 543.541 1410.84   4
   9 -13  22-258.676 1176.28   1
  13  -9  19 8781.86 1542.37   1
  -9  -4  19 10855.0 1821.06   3
  -9  -4  19 7396.09 1383.39   1
 -13   4  19 9920.35 1588.37   3
  -4  -9 -19 6622.47 1231.95   2
   9 -13  19 7718.60 1577.75   1
 -13   9 -19 4764.34 1180.57   4
  -9  13 -19 11583.8 2326.37   4
   4 -13 -19 8544.62 1341.33   2
  13  -9  16 43247.9 2866.11   1
  -9  -4  16 47593.2 2990.61   1
  -9  -4  16 53411.6 3560.48   3
 -13   9 -16 47412.1 3166.53   4
  -9  13 -16 45263.4 3646.40   4
   9 -13  16 39863.8 3103.11   1
   4 -13 -16 46552.9 3021.21   2
  -4  -9 -16 37899.5 2982.44   2
 -13   4  16 50033.3 3023.41   3
  13  -9  13 67316.3 3338.01   1
 -13   9 -13 73502.6 3726.81   4
  -9  13 -13 67517.7 4131.29   4
  -9  -4  13 73694.9 3618.90   1
   9 -13  13 67803.0 3754.69   1
   4 -13 -13 73521.2 3873.24   2
  -4  -9 -13 66217.2 3511.28   3
  -9  -4  13 73026.0 4134.70   3
 -13   4  13 69091.5 3499.62   3
 -13   4  10 51842.3 2936.02   3
  13  -9  10 50214.2 2575.89   1
 -13   9 -10 50385.9 2862.81   4
   9 -13  10 48045.1 2722.01   2
   9 -13  10 53234.3 3175.27   1
   4 -13 -10 52108.0 3292.72   2
  -4  -9 -10 52985.0 3192.96   3
  -9  -4  10 49994.5 3294.36   3
  -9  13 -10 54667.4 3500.44   4
  -9  13  -7 189676. 6689.64   4
   9 -13   7 190937. 6372.66   1
   9 -13   7 193465. 6281.91   2
   4 -13  -7 189717. 6965.83   2
  -4  -9  -7 180365. 6805.86   3
  -9  -4   7 187978. 6917.31   3
  13  -9   7 196013. 5489.78   1
   9 -13   4 172561. 5909.54   2
   4 -13  -4 165414. 6390.25   2
  -4  -9  -4 165739. 6517.12   3
  -9  -4   4 171685. 6399.80   3
  -9  13  -4 170699. 6031.17   4
  13  -9   4 169626. 4634.09   1
  13  -9   1 195990. 4634.36   1
   4   9   1 203746. 5141.77   4
   9 -13   1 191084. 6448.18   2
   4 -13  -1 188862. 6976.50   2
 -13   4   1 190743. 4514.35   1
  -4  -9  -1 195854. 7269.04   3
  -9  -4   1 189610. 6844.22   3
  -4  13  -2 219604. 6778.95   4
   4   9  -2 218797. 6243.28   4
   9 -13  -2 216885. 7012.72   2
   4 -13   2 216331. 7412.28   2
  -4  -9   2 217440. 7914.87   3
  -9  -4  -2 207378. 7227.87   3
  -4  13  -5 99216.0 4454.78   4
   4   9  -5 100747. 4292.75   4
   9 -13  -5 97898.3 4325.12   2
   4 -13   5 103876. 4524.22   2
  -4  -9   5 107353. 5219.27   3
  -9  -4  -5 102455. 4598.84   3
  -4  13  -8 61035.2 3599.49   4
   9 -13  -8 61654.6 3322.63   2
   4   9  -8 62486.3 3580.94   4
   4 -13   8 67354.5 3426.60   2
  -4  -9   8 61984.6 3883.82   3
  -9  -4  -8 59860.1 3371.87   3
   4 -13  11 35829.4 2877.22   1
  -4  13 -11 41442.4 3183.99   4
   9 -13 -11 39703.7 2644.61   2
   4   9 -11 37791.1 3060.45   4
   4 -13  11 38414.9 2466.65   2
  -4  -9  11 41732.2 3264.03   3
  -9  -4 -11 38296.9 2643.71   3
  -4  -9  14 49621.3 3344.73   1
  -4  13 -14 51864.8 3899.44   4
   4 -13  14 46027.9 3390.83   1
   9 -13 -14 48515.8 2912.79   2
   4   9 -14 56407.1 4050.04   4
   4 -13  14 53941.4 2818.57   2
  -4  -9  14 50443.1 3606.23   3
  -9  -4 -14 52473.8 3047.05   3
  -4  -9  17 2013.58 1235.94   3
  -4  13 -17 807.981 1281.31   4
   4   9 -17-1647.80 1458.55   4
  -4  -9  17 1297.72 1138.61   1
   4 -13  17 1980.51 1245.83   1
   9 -13 -17 1747.62 845.760   2
   4 -13  20 4342.30 1630.21   1
   4   9 -20 1157.39 1234.83   4
  -4  -9  20 3835.26 1308.95   1
  -4  13 -20 2518.14 1506.04   4
   9 -13 -20 2484.95 881.113   2
  -4  -9  23 5957.20 1596.55   1
   4 -13  23 6169.27 1804.30   1
  -4  13 -23 4702.23 1954.99   4
   4   9 -23 3873.62 1854.24   4
  -4  -9  26 23480.5 2957.77   1
   4 -13  26 19151.0 2922.19   1
  -4  13 -26 20413.8 3097.76   4
   4   9 -26 18824.6 3052.95   4
  10 -13  26 11493.9 2248.43   1
 -13  10 -26 9536.70 2056.51   4
  13 -10  26 11237.1 2057.21   1
 -10  13 -26 9143.11 2191.15   4
  10   3 -26 9169.52 2207.98   4
  13 -10  23 102635. 5375.47   1
 -13  10 -23 94714.5 5467.94   4
  10 -13  23 101975. 5762.25   1
 -10  13 -23 99468.9 6266.72   4
  13 -10  20 102507. 5000.63   1
 -10  13 -20 101341. 6035.21   4
   3 -13 -20 97001.5 4494.96   2
  -3 -10 -20 83169.5 4625.51   2
  10 -13  20 93672.9 5184.26   1
 -10  -3  20 111772. 5579.74   3
 -13  10 -20 101042. 5344.67   4
 -13  10 -17 129220. 5727.12   4
  13 -10  17 125251. 5302.63   1
  10 -13  17 114786. 5493.71   1
 -10  13 -17 122852. 6356.71   4
   3 -13 -17 123867. 5316.42   2
 -10  -3  17 122832. 5013.81   1
  -3 -10 -17 114745. 5430.37   2
 -10  -3  17 128038. 5811.12   3
 -13   3  17 131042. 5461.83   3
 -13  10 -14 120564. 5155.49   4
 -10  13 -14 121580. 5871.87   4
   3 -13 -14 120985. 5301.60   2
 -10  -3  14 112944. 4645.19   1
  10 -13  14 122693. 5250.66   1
  -3 -10 -14 115266. 4695.18   3
  -3 -10 -14 116439. 5534.75   2
 -10  -3  14 120566. 5475.04   3
 -13   3  14 122155. 5044.45   3
  13 -10  14 124528. 4920.18   1
 -13  10 -11 54941.7 3156.68   4
 -10  13 -11 52663.0 3539.03   4
   3 -13 -11 53920.3 3592.89   2
  10 -13  11 50353.1 3097.50   1
  -3 -10 -11 57460.5 3326.64   3
 -10  -3  11 57365.2 3520.19   3
  13 -10  11 56408.4 2918.86   1
 -13   3  11 56931.1 3135.33   3
 -10  13  -8 98458.7 4659.31   4
  10 -13   8 103335. 4281.63   2
  10 -13   8 105809. 4376.02   1
   3 -13  -8 111316. 5173.85   2
  -3 -10  -8 108547. 4947.82   3
  13 -10   8 105541. 3908.32   1
 -10  -3   8 110423. 4934.59   3
 -13   3   8 108500. 4443.53   3
  10 -13   5 187364. 6068.43   1
  10 -13   5 185788. 6263.42   2
   3 -13  -5 183024. 7047.67   2
  -3 -10  -5 186294. 7111.43   3
 -10  13  -5 182276. 6539.20   4
  13 -10   5 199631. 5384.28   1
 -10  -3   5 193943. 6853.74   3
   3  10   2 196870. 5022.69   4
  10 -13   2 185868. 6333.36   2
   3 -13  -2 194106. 7249.06   2
  -3 -10  -2 186637. 7239.55   3
  13 -10   2 190844. 4942.27   1
 -10  -3   2 191888. 6838.40   3
  -3 -10   1 24471.4 2471.29   3
   3  10  -1 27496.6 1716.46   4
  10 -13  -1 25872.2 2128.40   2
   3 -13   1 23953.7 2349.59   2
  -3  13  -1 26614.6 1973.17   4
  13 -10  -1 26466.6 1116.67   1
 -10  -3  -1 28602.4 2352.37   3
  -3 -10   4 20068.1 2347.25   3
   3 -13   4 22191.6 2097.54   2
   3  10  -4 21763.1 1770.84   4
  10 -13  -4 18543.2 1829.51   2
 -10  -3  -4 20874.3 2096.28   3
  -3  13  -4 23897.6 1968.87   4
  -3 -10   7 12715.2 1901.00   3
   3 -13   7 16147.4 1775.38   2
 -10  -3  -7 13484.5 1669.19   3
  -3  13  -7 12830.9 1725.06   4
   3  10  -7 13414.7 1671.52   4
  10 -13  -7 10821.6 1512.12   2
  -3 -10  10 6513.20 1617.73   3
   3 -13  10 3863.99 1080.75   2
 -10  -3 -10 3101.49 946.621   3
  -3  13 -10 6834.43 1454.36   4
   3  10 -10 3774.03 1192.12   4
  10 -13 -10 2651.58 954.772   2
   3 -13  13 1147.06 674.865   2
  -3 -10  13 2359.43 1308.06   3
 -10  -3 -13 998.977 776.505   3
   3 -13  13 2570.67 1170.79   1
  -3  13 -13 2242.12 1238.47   4
   3  10 -13 4179.93 1509.55   4
  10 -13 -13 3422.47 1003.48   2
 -10  -3 -16 2943.46 944.921   3
  -3 -10  16 4034.53 1021.12   2
   3  10 -16 996.885 1333.06   4
  -3  13 -16 2594.03 1616.15   4
  -3 -10  16 1111.57 991.717   1
   3 -13  16 1420.04 1224.08   1
  10 -13 -16 2821.43 949.969   2
   3 -13  16 2762.29 811.274   2
  -3  13 -19 102389. 6223.12   4
   3  10 -19 92040.6 5734.16   4
  -3 -10  19 101717. 5331.85   1
   3 -13  19 101002. 5460.24   1
  -3  13 -22 73702.1 5500.69   4
   3  10 -22 70356.6 5224.25   4
  -3 -10  22 74772.0 4762.11   1
   3 -13  22 71331.8 4764.36   1
  -3  13 -25 113427. 7043.15   4
   3  10 -25 110663. 6803.34   4
  -3 -10  25 103877. 5988.60   1
   3 -13  25 99543.4 6093.98   1
 -13  11 -27-61.5442 1276.90   4
 -13  11 -24 202.173 1268.58   4
 -11  13 -24-1385.29 1692.46   4
  13 -11  24 3922.93 1576.09   1
  11 -13  24 335.718 1381.21   1
   2 -13 -21 1080.42 839.254   2
 -11  -2  21 1109.78 1117.61   3
  13 -11  21 1702.65 1131.90   1
 -11  13 -21 1320.37 1276.39   4
 -13  11 -21 557.632 1245.90   4
  11 -13  21 2326.89 1394.07   1
   2 -13 -18-356.186 992.465   2
 -11  -2  18 1701.97 1102.78   3
  -2 -11 -18-35.6209 877.512   2
 -13   2  18 1672.97 928.778   3
  13 -11  18 1775.00 973.719   1
  11 -13  18 3180.79 1209.35   1
 -13  11 -18 193.240 998.143   4
 -11  13 -18 1299.70 1315.50   4
   2 -13 -15 4291.93 1202.48   2
 -11  -2  15 1924.09 1078.40   3
  -2 -11 -15 2462.68 1042.70   2
 -13   2  15 2857.73 958.757   3
  11 -13  15 832.537 926.906   1
 -13  11 -15 2587.29 1012.21   4
 -11  13 -15 823.042 1141.08   4
 -11  -2  15 2259.59 763.640   1
  13 -11  15 1122.84 783.990   1
  -2 -11 -12 3118.29 964.655   3
  11 -13  12 1910.54 904.338   1
   2 -13 -12 1299.51 904.317   2
 -11  -2  12 2762.27 1110.34   3
 -13   2  12 2383.45 1083.79   3
  -2 -11 -12 3270.59 1211.22   2
 -11  13 -12 5911.61 1415.21   4
 -11  -2  12 1637.85 683.542   1
  13 -11  12 1527.07 797.041   1
 -13  11 -12 2464.90 1068.18   4
  -2 -11  -9 2948.82 961.016   3
  -2 -11  -9 2015.99 1087.71   2
   2 -13  -9 3550.98 1079.79   2
 -11  -2   9 1846.37 972.716   3
 -13  11  -9 2454.33 973.522   4
 -11  13  -9 3198.76 1212.34   4
 -13   2   9 3380.09 1070.95   3
  13 -11   9 2751.36 797.411   1
  11 -13   9 2160.78 820.108   1
  -2 -11  -6 17119.8 2008.67   3
  11 -13   6 14669.3 1482.93   1
   2 -13  -6 15287.2 2064.34   2
 -11  -2   6 10931.9 1621.66   3
 -13   2   6 14659.4 1693.18   3
  13 -11   6 13334.5 1236.73   1
 -11  13  -6 16489.0 1791.55   4
  11 -13   6 14296.5 1605.23   2
  -2 -11  -3 2035.49 1100.92   3
  13 -11   3 609.484 435.726   1
   2 -13  -3 122.988 1052.57   2
 -11  -2   3-934.514 1139.68   3
 -13   2   3 159.866 732.920   3
  11 -13   3 743.080 534.318   1
  11 -13   3 1063.32 845.722   2
  -2 -11   0 3154.49 1295.71   3
  13 -11   0 1711.37 447.142   1
   2 -13   0 1964.53 1113.03   2
 -11  -2   0 832.199 827.829   3
  -2  13   0 971.908 571.884   4
   2  11   0 1733.17 529.757   4
  11 -13   0 1656.60 819.304   2
  -2 -11   3 3394.78 1331.02   3
   2 -13   3 4298.79 1252.28   2
   2  11  -3 3832.95 848.144   4
  -2  13  -3 5058.22 1089.58   4
 -11  -2  -3 2206.82 999.676   3
  11 -13  -3 5018.82 1160.31   2
  13 -11  -3 4036.09 455.692   1
  -2 -11   6 14869.7 2082.29   3
   2 -13   6 13364.2 1727.98   2
  -2  13  -6 12628.4 1644.05   4
   2  11  -6 12171.9 1573.50   4
  11 -13  -6 16313.7 1759.47   2
 -11  -2  -6 13709.6 1678.43   3
  -2 -11   9 8844.72 1738.40   3
   2 -13   9 6131.61 1221.33   2
 -11  -2  -9 6631.53 1224.08   3
  -2  13  -9 6030.64 1379.17   4
   2  11  -9 5676.95 1344.34   4
  11 -13  -9 6602.15 1276.19   2
  -2 -11  12 29824.8 2851.00   3
  11 -13 -12 28589.3 2270.79   2
  -2  13 -12 33023.0 2985.93   4
   2  11 -12 32414.7 2891.97   4
   2 -13  12 33568.3 2423.41   2
  -2 -11  12 29390.6 2498.51   2
 -11  -2 -12 32085.9 2431.00   3
   2 -13  15 3578.54 895.301   2
  -2 -11  15 2585.07 912.653   2
 -11  -2 -15 3469.04 973.316   3
  -2 -11  15 2521.48 1197.71   1
  -2  13 -15 4316.36 1721.82   4
   2 -13  15 3285.72 1357.84   1
   2  11 -15-1451.52 1402.04   4
  -2  13 -18 4255.04 1677.95   4
   2  11 -18 664.118 1540.13   4
  -2 -11  18 3419.59 1421.76   1
   2 -13  18 4064.20 1448.54   1
  -2  13 -21 544.877 1378.94   4
   2  11 -21-249.565 1564.83   4
  -2 -11  21 1253.02 1212.61   1
   2 -13  21 1337.76 1474.24   1
  -2 -11  24 15225.2 2406.58   1
   2 -13  24 14714.7 2470.23   1
  -2  13 -24 12169.0 2465.85   4
   2  11 -24 12030.5 2460.95   4
  13 -12  25 59560.8 4360.47   1
 -12  13 -25 62422.4 5179.00   4
 -13  12 -25 64316.9 4850.20   4
  12 -13  25 73719.1 4952.10   1
  13 -12  22 66645.0 4399.81   1
 -13  12 -22 74395.0 4996.17   4
 -12  13 -22 68403.4 4959.64   4
  12 -13  22 73614.0 4685.53   1
 -12  13 -19 51720.4 4124.90   4
 -13  12 -19 59824.9 4162.05   4
   1 -13 -19 54955.8 3529.58   2
  -1 -12 -19 53862.9 3503.47   2
 -12  -1  19 53696.2 3765.69   3
  12 -13  19 44887.6 3479.29   1
 -13   1  19 53994.6 3679.35   3
  13 -12  19 55709.0 3707.01   1
   1 -13 -16 19494.4 2238.48   2
  -1 -12 -16 18538.9 2207.24   2
 -12  -1  16 24248.9 2337.68   3
 -13   1  16 20410.9 2206.31   3
  12 -13  16 19932.2 2196.26   1
 -13  12 -16 20250.1 2329.03   4
 -12  13 -16 18621.9 2462.00   4
  13 -12  16 21505.5 2188.70   1
   1 -13 -13 21479.5 2391.39   2
  -1 -12 -13 20221.2 2358.39   2
 -13   1  13 20388.8 2148.34   3
  12 -13  13 21881.6 2072.18   1
 -12  13 -13 17202.4 2120.86   4
  13 -12  13 20720.7 1971.64   1
 -13  12 -13 16754.6 2011.40   4
 -12  -1  13 22571.7 2335.02   3
 -12  13 -10 831.355 910.965   4
  12 -13  10 777.587 772.464   1
   1 -13 -10 120.536 1087.77   2
 -12  -1  10-372.573 909.369   3
  -1 -12 -10 442.210 1041.24   2
 -13   1  10 539.138 893.948   3
  13 -12  10 970.312 707.146   1
 -12  -1  10 543.500 517.554   1
 -13  12 -10 808.967 955.684   4
  -1 -12  -7 3029.90 1103.44   3
   1 -13  -7 4783.94 1412.94   2
 -12  13  -7 3938.82 1137.73   4
 -12  -1   7 1731.89 889.637   3
  -1 -12  -7 5481.69 1451.90   2
 -13   1   7 4561.85 1110.90   3
  13 -12   7 3815.86 845.834   1
  12 -13   7 4861.21 909.459   1
  -1 -12  -4 5863.30 1392.99   3
  13 -12   4 6688.46 903.145   1
   1 -13  -4 5367.32 1344.45   2
 -12  -1   4 5884.47 1194.34   3
  -1 -12  -4 6185.59 1677.34   2
 -13   1   4 5404.06 1163.72   3
  12 -13   4 4616.44 820.301   1
 -13   1   1 55955.4 3253.83   3
  -1  13   1 55116.2 2685.85   4
  12 -13   1 52060.4 2477.39   1
  13 -12   1 51566.3 2201.89   1
   1 -13  -1 52954.3 3738.73   2
  -1 -12  -1 55773.9 3772.64   3
  -1 -12  -1 55775.2 3884.62   2
   1  12   1 54485.6 2496.82   4
 -12  -1   1 53271.7 3261.45   3
 -13   1  -2 134267. 5297.82   3
  -1  13  -2 141361. 4999.97   4
  12 -13  -2 135442. 5262.22   2
  13 -12  -2 129015. 3729.14   1
   1 -13   2 133547. 5971.91   2
   1  12  -2 133057. 4742.47   4
  -1 -12   2 132770. 6170.59   2
  -1 -12   2 138080. 6233.13   3
 -12  -1  -2 123352. 5219.03   3
  12 -13  -5 118585. 4923.11   2
   1  12  -5 125981. 4983.68   4
   1 -13   5 132026. 5675.70   2
  -1 -12   5 131243. 6122.71   3
  -1 -12   5 121961. 5738.67   2
  -1  13  -5 125672. 5035.17   4
 -12  -1  -5 116834. 5029.84   3
  12 -13  -8 113464. 4785.66   2
  -1  13  -8 107800. 5023.04   4
   1  12  -8 114431. 5201.80   4
   1 -13   8 124022. 5330.91   2
  -1 -12   8 127847. 5588.28   2
 -12  -1  -8 114635. 4859.45   3
  -1  13 -11 124765. 5855.63   4
   1  12 -11 123602. 5750.17   4
   1 -13  11 118645. 5020.52   2
  -1 -12  11 119373. 5287.49   2
 -12  -1 -11 116832. 4948.02   3
  -1 -12  14 155358. 6636.57   1
  -1  13 -14 158902. 7186.16   4
   1  12 -14 152586. 7043.35   4
   1 -13  14 148166. 5610.92   2
  -1 -12  14 153890. 5867.59   2
   1 -13  14 155325. 6698.29   1
 -12  -1 -14 160735. 5883.94   3
 -13   1 -17 109062. 4651.03   3
  -1  13 -17 90847.2 5684.73   4
  -1 -12  17 102791. 5388.23   1
   1 -13  17 99874.3 5347.72   1
   1  12 -17 99225.8 5916.01   4
 -12  -1 -17 96043.7 4410.18   3
   1 -13  20 94494.7 5403.84   1
  -1  13 -20 85441.4 5744.00   4
   1  12 -20 73828.3 5346.18   4
  -1 -12  20 86064.9 5141.00   1
  -1 -12  23 21034.8 2737.61   1
   1 -13  23 24615.5 3098.63   1
  -1  13 -23 18570.4 2875.80   4
   1  12 -23 23204.4 3261.25   4
  -1 -12  26 12300.7 2416.49   1
 -13  13 -26 31631.3 3570.21   4
  13 -13  23 6979.93 1654.86   1
 -13  13 -23 6628.13 1911.31   4
   0 -13 -20 7149.06 1508.02   2
 -13   0  20 5625.02 1517.07   3
 -13  13 -20 1676.50 1453.56   4
  13 -13  20 3007.59 1277.40   1
   0 -13 -17 2295.23 889.539   2
 -13   0  17 2614.05 1223.28   3
 -13  13 -17 2486.43 1268.54   4
  13 -13  17 3088.97 1115.25   1
   0 -13 -14 24180.9 2501.46   2
  13 -13  14 23966.2 2255.64   1
 -13  13 -14 29832.1 2791.33   4
 -13   0  14 27212.0 2520.86   3
   0 -13 -11 21016.5 2435.68   2
 -13   0  11 17514.9 1990.48   3
 -13  13 -11 21114.4 2271.12   4
  13 -13  11 19445.6 1916.67   1
  13 -13   8 93003.0 3824.68   1
   0 -13  -8 76382.2 4711.31   2
 -13  13  -8 79440.8 4165.19   4
 -13   0   8 87884.1 4377.06   3
   0 -13  -5 113370. 5764.64   2
  13 -13   5 103973. 3924.95   1
 -13   0   5 104720. 4796.85   3
  13 -13   2 302851. 7759.78   1
   0 -13  -2 309308. 10526.7   2
 -13   0   2 296790. 9163.13   3
   0  13  -1 98888.8 3853.82   4
  13 -13  -1 84116.5 3101.31   1
   0 -13   1 86112.1 4912.94   2
 -13   0  -1 85545.0 4251.95   3
   0  13  -4 362599. 10145.7   4
 -13   0  -4 365297. 10528.9   3
 -13   0  -7 118436. 5037.72   3
   0 -13   7 120112. 5548.14   2
   0  13  -7 122903. 5288.89   4
 -13   0 -10 87025.2 4260.90   3
   0  13 -10 88737.0 4718.87   4
   0 -13  10 86510.4 4434.43   2
   0  13 -13 22396.7 2677.28   4
   0 -13  13 27670.1 2337.53   2
 -13   0 -13 21629.0 2047.38   3
   0 -13  16 90628.1 5125.50   1
   0  13 -16 84730.6 5400.03   4
   0 -13  16 89543.3 4144.27   2
 -13   0 -16 93615.0 4366.76   3
   0  13 -19 6668.98 1990.41   4
   0 -13  19 7872.16 1796.44   1
   0  13 -22 2685.13 1639.03   4
   0 -13  22 2716.74 1809.02   1
   0 -13  25 27312.0 3299.82   1
   0  13 -25 25356.9 3509.32   4
  -7  -7   0 17696.8 2147.57   3
   7   7   0 17949.4 1286.60   4
   7 -14   0 15553.3 1850.08   2
  -7  -7   3 1275.77 1007.96   3
  -7  -7  -3 278.934 958.888   3
  -7  14  -3-324.461 799.082   4
   7   7  -3 1561.07 689.447   4
   7 -14   3 1171.02 875.308   2
   7 -14  -3-147.268 942.667   2
  -7  14  -6 18260.0 1962.39   4
  -7  -7   6 18290.4 2160.07   3
  -7  -7  -6 20494.0 2100.61   3
   7   7  -6 21796.5 1946.44   4
   7 -14   6 19610.5 1929.43   2
   7 -14  -6 17482.9 1879.24   2
  14  -7   9 2329.04 617.697   1
  -7  -7   9 1484.16 1151.73   3
  -7  -7  -9 264.555 771.858   3
   7 -14   9 1804.04 968.012   1
  -7  14  -9 1350.94 971.359   4
   7   7  -9 2325.11 1000.26   4
   7 -14   9 932.153 792.746   2
   7 -14  -9 2.52425 975.318   2
  -7  -7  12 5795.88 1362.45   3
  -7  -7 -12 8551.74 1378.68   3
  14  -7  12 7215.67 1139.99   1
  -7  14 -12 8262.18 1670.90   4
   7 -14  12 7379.92 1407.11   1
   7   7 -12 8054.59 1781.60   4
   7 -14  12 9229.28 1250.62   2
   7 -14 -12 8184.15 1327.45   2
  -7  -7  15 3208.06 1324.27   3
  -7  -7 -15 3459.49 852.870   3
  14  -7  15 4531.97 1097.02   1
 -14   7  15 4814.48 1018.72   3
  -7  14 -15 1568.20 1338.66   4
  -7  -7  15 4135.66 1090.75   1
 -14   7 -15 5668.28 1130.14   4
   7   7 -15 4583.97 1355.72   4
   7 -14  15 4524.59 1442.36   1
   7 -14  15 3411.57 874.611   2
   7 -14 -15 2976.84 1011.89   2
   7 -14  18 2062.22 1321.38   1
  -7  -7  18-843.613 1166.75   3
 -14   7 -18 403.739 763.577   4
  14  -7  18 1406.19 886.536   1
   7   7 -18-127.804 1244.34   4
  -7  -7  18 125.730 854.354   1
   7 -14 -18 527.141 839.708   2
  -7  14 -18 1851.15 1574.95   4
  -7  -7  21 5138.37 1444.32   3
  -7  -7  21 5363.65 1486.11   1
   7 -14  21 1811.57 1126.47   1
  -7  14 -21 4971.52 1582.22   4
   7   7 -21 3976.33 1725.10   4
  14  -7  21 6535.88 1457.20   1
   7 -14 -21 3450.64 987.610   2
  -7  -7  24 1515.62 1241.16   1
  -7  14 -24-3119.94 2244.69   4
   7 -14  24-1844.59 1668.38   1
   7   7 -24 364.543 1506.05   4
  14  -8  25 44121.9 3596.55   1
   8   6 -25 44505.9 4263.60   4
  -8  14 -25 36849.4 3965.06   4
   8 -14  25 40824.5 3895.69   1
 -14   8 -22 29788.5 2676.12   4
  14  -8  22 31258.3 2824.43   1
   8   6 -22 39192.3 3791.49   4
  -8  14 -22 32669.7 3708.69   4
  -8  -6  22 31461.7 2939.05   1
   8 -14  22 33029.4 3310.79   1
  -8  -6  22 34822.9 3314.81   3
 -14   8 -19 61629.4 3647.32   4
  -8  14 -19 56315.3 4548.61   4
   6 -14 -19 60818.6 3466.55   2
   8   6 -19 69770.9 4762.28   4
  -8  -6  19 59454.3 3788.76   1
   8 -14  19 65760.4 4264.75   1
  -8  -6  19 57013.3 4072.79   3
  14  -8  19 58159.5 3568.02   1
  14  -8  16 55067.4 3234.11   1
 -14   8 -16 58947.8 3363.15   4
  -8  14 -16 55227.7 4250.78   4
  -8  -6  16 61375.5 3627.55   1
   8   6 -16 63460.2 4351.18   4
   6 -14 -16 59428.6 3452.79   2
   8 -14  16 60669.6 3930.34   1
  -8  -6  16 55459.6 3858.78   3
   8 -14  16 60225.4 3029.08   2
 -14   6  16 60358.2 3353.61   3
  -8  -6  13-197.790 1050.04   3
  -6  -8 -13 3758.56 1014.81   3
 -14   6  13 3122.69 904.375   3
  -8  -6  13 2747.29 1082.26   1
 -14   8 -13 2765.05 972.116   4
  -8  14 -13 1193.93 1267.19   4
   8   6 -13 3294.89 1307.34   4
  14  -8  13-509.753 737.657   1
   8 -14  13 1651.94 995.740   1
   8 -14  13 1829.17 738.449   2
   6 -14 -13 2852.80 1029.34   2
  -8  14 -10 75884.8 4347.59   4
  14  -8  10 70412.3 3143.30   1
   8 -14  10 83220.7 4148.89   1
   8 -14  10 75932.5 3586.40   2
   8   6 -10 71808.9 4124.42   4
   6 -14 -10 72076.3 3961.55   2
  -6  -8 -10 77697.7 4058.95   3
  -8  -6  10 75660.2 4318.18   3
   6 -14  -7 6298.56 1396.86   2
  -6  -8  -7 5283.88 1315.88   3
  -8  -6   7 7550.56 1553.68   3
  -8  14  -7 7059.81 1361.39   4
   8   6  -7 5722.80 1131.32   4
   8 -14   7 5711.26 1170.71   2
  14  -8   7 6756.11 878.597   1
   6 -14  -4 6645.38 1283.41   2
  -6  -8  -4 6559.83 1364.34   3
  -8  -6   4 7968.20 1580.16   3
  14  -8   4 7026.68 731.861   1
  -8  14  -4 8627.82 1415.87   4
   8   6  -4 6792.63 1113.80   4
   8 -14   4 5913.27 1223.04   2
   8   6  -1 66026.7 2861.59   4
   8 -14   1 71189.0 3693.60   2
   6   8   1 70394.6 2436.01   4
   6 -14  -1 71991.0 3903.32   2
  -6  -8  -1 71048.2 4119.12   3
  -8  -6   1 75153.9 4166.57   3
  -6  14  -2 107190. 4453.84   4
   8   6   2 98031.3 2796.48   4
   6   8  -2 101327. 3748.98   4
   6 -14   2 98558.5 4547.25   2
   8 -14  -2 89787.0 4590.94   2
  -6  -8   2 99792.6 4973.69   3
  -8  -6  -2 93349.8 4647.38   3
   6   8  -5 106763. 4418.24   4
   8 -14  -5 99829.6 4667.38   2
  -6  14  -5 107840. 4715.94   4
   6 -14   5 110589. 4672.24   2
  -6  -8   5 99650.3 5080.46   3
  -8  -6  -5 102244. 4850.54   3
   6   8  -8 106945. 4847.03   4
   8 -14  -8 103842. 4676.09   2
   6 -14   8 106397. 4498.14   2
  -6  14  -8 99114.7 4835.05   4
  -6  -8   8 104739. 5214.88   3
  -8  -6  -8 96380.5 4662.13   3
   6 -14  11 97799.9 4781.19   1
  -6  14 -11 95032.8 4967.26   4
   6   8 -11 94509.4 4953.22   4
   8 -14 -11 92992.9 4372.45   2
   6 -14  11 88939.6 4070.91   2
  -6  -8  11 92683.0 4966.79   3
  -8  -6 -11 92549.5 4421.52   3
   8 -14 -14 54514.5 3261.17   2
  -6  14 -14 56986.2 4120.78   4
   6 -14  14 55565.8 3724.26   1
   6 -14  14 55254.6 2964.66   2
   6   8 -14 52176.0 3864.31   4
  -6  -8  14 59935.6 3605.85   1
  -6  -8  14 56243.2 3874.63   3
  -8  -6 -14 58361.7 3323.43   3
  -6  14 -17 39096.9 3764.82   4
   8 -14 -17 38665.8 2720.57   2
  -6  -8  17 41698.9 3183.75   1
   6   8 -17 44157.7 3805.13   4
 -14   6 -17 40078.6 2586.24   4
   6 -14  17 41623.6 3400.03   1
  -6  -8  17 44966.1 3489.91   3
 -14   8  17 37494.6 2494.34   3
  -6  -8  20 16108.3 2302.43   3
   6 -14  20 13808.6 2231.58   1
  -6  14 -20 11522.1 2378.61   4
   6   8 -20 14415.5 2577.85   4
   8 -14 -20 14326.1 1639.24   2
  -6  -8  20 13129.0 2006.92   1
  -6  -8  23 11751.0 2064.84   1
   6 -14  23 12591.4 2297.67   1
  -6  14 -23 12064.8 2503.39   4
   6   8 -23 15801.3 2729.16   4
  -6  -8  26 28141.1 3088.30   1
   6   8 -26 28977.4 3626.14   4
  -9  14 -26 2549.55 1674.45   4
  14  -9  26 3508.11 1507.41   1
   9 -14  26 4171.40 1704.19   1
  14  -9  23 2453.07 1277.70   1
   9 -14  23-969.483 1491.22   1
 -14   9 -23 363.286 994.042   4
  -9  14 -23-544.206 1542.12   4
   9   5 -23-1015.48 1159.91   4
  -9  -5  20 2655.26 1207.78   3
  -9  -5  20 529.217 864.687   1
  -5  -9 -20 804.105 844.011   2
   9 -14  20 1843.75 1286.21   1
 -14   9 -20-105.601 998.083   4
  -9  14 -20 2.37414 1317.00   4
  14  -9  20 2106.05 1150.88   1
   9   5 -20 1537.85 1336.87   4
   5 -14 -20 1612.78 848.278   2
  14  -9  17 8463.31 1415.13   1
  -9  -5  17 7743.90 1642.60   3
   9 -14  17 9638.02 1793.78   1
 -14   5  17 8409.30 1379.71   3
  -9  14 -17 7269.68 1829.25   4
 -14   9 -17 9204.75 1546.57   4
   9   5 -17 12249.4 2104.22   4
  -9  -5  17 10911.4 1651.13   1
   5 -14 -17 8278.47 1366.89   2
  -5  -9 -14 658.671 691.605   3
  14  -9  14 634.456 667.044   1
  -9  -5  14 1045.66 1133.47   3
  -9  -5  14 704.800 704.074   1
   9 -14  14 963.628 703.135   2
 -14   5  14 420.589 692.650   3
 -14   9 -14 1046.21 795.384   4
   9 -14  14-223.887 988.138   1
   5 -14 -14 464.288 845.591   2
  -9  14 -14-771.233 1395.22   4
 -14   5  11 38314.3 2543.42   3
  14  -9  11 33815.5 2186.85   1
   9 -14  11 35010.5 2364.00   2
   9 -14  11 35824.6 2724.29   1
   5 -14 -11 30511.7 2590.12   2
  -5  -9 -11 37436.3 2750.04   3
  -9  -5  11 37243.8 2939.33   3
  -9  14 -11 34632.3 2952.94   4
  14  -9   8 61714.6 2703.56   1
  -9  14  -8 54982.3 3485.69   4
   9 -14   8 56163.5 3292.04   1
   9 -14   8 59710.6 3192.26   2
   5 -14  -8 57544.1 3611.99   2
  -5  -9  -8 57499.7 3600.60   3
  -9  -5   8 63951.1 3789.51   3
  14  -9   5 143988. 4169.39   1
  -9  14  -5 144085. 5606.38   4
   9 -14   5 128784. 5193.85   2
   5 -14  -5 134772. 5815.64   2
  -5  -9  -5 137931. 5963.16   3
  -9  -5   5 142090. 5948.65   3
  14  -9   2 90756.1 2642.51   1
   5   9   2 93903.6 2710.92   4
   9 -14   2 84394.2 4099.82   2
   9   5  -2 85748.8 3593.77   4
   5 -14  -2 82549.8 4339.17   2
  -5  -9  -2 85073.7 4621.35   3
  -9  -5   2 92618.1 4589.33   3
  -5  14  -1 148780. 5439.59   4
   5   9  -1 152841. 4673.62   4
   9 -14  -1 145976. 5686.84   2
   9   5   1 147771. 4267.39   4
   5 -14   1 144261. 5914.11   2
  -5  -9   1 149661. 6373.52   3
  -9  -5  -1 154776. 6111.98   3
  -5  14  -4 58970.5 3310.73   4
   5   9  -4 57283.6 2976.49   4
   9 -14  -4 58917.8 3390.15   2
   5 -14   4 53261.7 3274.29   2
  -5  -9   4 59509.0 3896.86   3
  -9  -5  -4 56749.0 3505.14   3
  -5  14  -7 69714.8 3945.06   4
   5   9  -7 77019.0 3944.41   4
   9 -14  -7 77661.9 3911.81   2
   5 -14   7 79096.7 3859.36   2
  -5  -9   7 78639.9 4527.01   3
  -9  -5  -7 70297.2 3913.57   3
  -5  14 -10 106470. 5252.35   4
   9 -14 -10 111748. 4816.49   2
   5 -14  10 118360. 4744.04   2
  -5  -9  10 110926. 5560.12   3
   5   9 -10 110846. 5302.45   4
  -9  -5 -10 110885. 4985.59   3
  -5  14 -13 112720. 5785.21   4
   5 -14  13 117610. 5530.81   1
   9 -14 -13 111091. 4766.54   2
   5   9 -13 104468. 5483.74   4
   5 -14  13 110477. 4499.17   2
  -5  -9  13 110529. 5604.22   3
  -9  -5 -13 109063. 4830.17   3
  -5  -9  16 23472.5 2630.57   3
   5 -14  16 19174.4 1701.42   2
  -5  14 -16 20505.9 2652.41   4
  -5  -9  16 17845.4 2223.75   1
   5   9 -16 19047.9 2535.38   4
   5 -14  16 20296.2 2429.77   1
   9 -14 -16 18668.2 1933.53   2
  -9  -5 -16 22376.2 2013.23   3
  -5  -9  19 6389.86 1641.88   3
  -5  14 -19 4585.88 1605.17   4
   5   9 -19 5493.65 1833.15   4
  -5  -9  19 8366.54 1711.86   1
   9 -14 -19 8793.36 1379.51   2
   5 -14  19 5334.98 1579.12   1
  -5  -9  22 1258.62 1281.02   1
   5 -14  22 985.842 1401.13   1
  -5  14 -22-1127.15 1659.65   4
   5   9 -22-1351.50 1440.61   4
   5 -14  25 2024.75 1493.83   1
  -5  14 -25 3126.64 1909.47   4
   5   9 -25 3516.26 1675.29   4
  -5  -9  25 393.729 1188.86   1
 -14  10 -24 352.809 1055.73   4
 -10  14 -24 631.977 1547.18   4
  14 -10  24 2034.23 1275.03   1
  10   4 -24 1269.65 1426.56   4
  10 -14  24 975.262 1370.49   1
 -10  -4  21 5025.34 1511.10   3
  10   4 -21 4227.40 1678.56   4
  10 -14  21 4459.00 1498.62   1
 -14  10 -21 3353.97 1249.65   4
 -10  14 -21 4673.25 1793.28   4
  14 -10  21 2951.57 1201.64   1
   4 -14 -21 3175.07 883.735   2
 -14  10 -18 1100.30 1039.48   4
 -10  -4  18 789.737 983.237   3
 -14   4  18 2716.80 1081.27   3
  -4 -10 -18 594.216 1013.18   2
 -10  14 -18 2126.47 1485.83   4
  10 -14  18 2619.60 1211.90   1
  14 -10  18 2345.76 1041.19   1
   4 -14 -18 1810.56 820.381   2
 -10  -4  18 2046.85 912.475   1
   4 -14 -15 4886.20 1142.84   2
  10 -14  15 5035.08 1209.62   1
 -10  -4  15 8366.59 1706.41   3
 -14   4  15 6693.64 1296.81   3
  -4 -10 -15 2806.49 1080.29   2
 -14  10 -15 8067.81 1469.51   4
 -10  14 -15 4191.50 1466.97   4
  14 -10  15 8793.16 1348.68   1
 -10  -4  15 7773.44 1316.77   1
   4 -14 -12 1493.78 930.260   2
  -4 -10 -12 1455.38 850.623   3
 -10  -4  12 3215.12 1291.70   3
 -14   4  12 1191.32 756.444   3
  14 -10  12 1645.61 733.421   1
 -10  -4  12 2500.27 940.520   1
 -14  10 -12 2470.13 1026.58   4
 -10  14 -12 1859.99 1172.99   4
  10 -14  12 1061.73 704.210   2
  10 -14  12 451.892 882.696   1
   4 -14  -9-519.133 943.820   2
  -4 -10  -9 795.553 784.416   3
 -10  -4   9 1287.47 980.628   3
  14 -10   9 322.660 556.402   1
 -14   4   9 1312.88 829.354   3
  10 -14   9 488.966 715.035   1
  10 -14   9 1368.83 860.251   2
 -10  14  -9 762.207 1048.67   4
   4 -14  -6 10201.3 1765.20   2
  -4 -10  -6 13579.4 1854.08   3
 -10  -4   6 13541.5 1853.86   3
  14 -10   6 10180.3 1037.29   1
 -10  14  -6 11969.8 1714.34   4
  10 -14   6 12445.7 1490.82   1
  10 -14   6 12324.8 1548.69   2
   4 -14  -3 8497.18 1635.87   2
  -4 -10  -3 4426.16 1173.76   3
  14 -10   3 7966.28 777.661   1
 -10  -4   3 6707.16 1414.27   3
  10 -14   3 8846.96 1330.44   2
   4 -14   0 1592.75 1133.34   2
  -4 -10   0-501.980 1139.45   3
 -10  -4   0 264.654 864.421   3
  14 -10   0 762.298 279.062   1
  -4  14   0-260.231 632.778   4
   4  10   0-79.9477 431.678   4
  10 -14   0-185.288 830.201   2
   4 -14   3 2366.24 1156.79   2
  -4 -10   3 482.283 920.705   3
 -10  -4  -3 324.700 926.653   3
  -4  14  -3 1077.47 796.203   4
   4  10  -3 777.116 630.373   4
  10   4   3 679.188 306.616   4
  10 -14  -3 614.514 816.995   2
   4 -14   6 1366.36 934.879   2
  -4 -10   6 3449.79 1451.64   3
 -10  -4  -6 2498.19 999.032   3
  -4  14  -6 1324.82 903.343   4
   4  10  -6 2458.80 790.840   4
  10 -14  -6 3770.50 1048.04   2
   4 -14   9 2485.73 789.769   2
  -4 -10   9 3780.25 1392.86   3
 -10  -4  -9 1824.43 886.697   3
  -4  14  -9 4925.28 1362.86   4
   4  10  -9 5158.69 1349.32   4
  10 -14  -9 2419.16 956.336   2
   4 -14  12 2538.36 903.645   2
  -4 -10  12 3018.00 1200.12   3
 -10  -4 -12 2124.73 839.288   3
  -4  14 -12 2231.03 1221.62   4
   4 -14  12 3342.91 1246.18   1
   4  10 -12 2122.46 1091.38   4
  10 -14 -12 1301.82 820.001   2
  -4 -10  15 11467.3 1838.43   3
 -10  -4 -15 11840.7 1579.21   3
  -4 -10  15 15429.8 2022.72   1
  -4  14 -15 14076.2 2221.70   4
   4 -14  15 12008.0 1885.91   1
   4  10 -15 13146.2 2117.44   4
  10 -14 -15 12969.6 1626.80   2
   4 -14  15 13103.2 1492.44   2
  -4  14 -18 1167.19 1326.62   4
   4  10 -18-1697.14 1588.97   4
  -4 -10  18 1731.69 1279.76   1
  10 -14 -18 1144.71 902.145   2
   4 -14  18 1647.29 1201.03   1
   4 -14  21 1977.92 1259.68   1
  -4  14 -21 1667.32 1310.22   4
   4  10 -21 67.5894 1613.40   4
  -4 -10  21 2752.02 1339.90   1
  -4 -10  24 450.408 1245.17   1
   4 -14  24-2470.42 1682.79   1
  -4  14 -24-2641.79 2155.36   4
   4  10 -24-1120.98 1599.83   4
  -4 -10  27 3437.48 1612.33   1
 -14  11 -25 14891.2 2224.33   4
 -11  14 -25 8445.17 2270.91   4
  11   3 -25 21959.2 3085.93   4
  14 -11  25 16323.6 2385.12   1
  11 -14  25 11114.4 2236.61   1
 -11  14 -22 44442.2 4139.82   4
  14 -11  22 51991.5 3741.95   1
 -14  11 -22 50213.8 3932.21   4
  11 -14  22 49243.6 4004.42   1
  14 -11  19 69068.8 4058.64   1
 -14  11 -19 68857.6 4357.31   4
 -11  14 -19 67780.3 4863.24   4
   3 -14 -19 68365.3 3905.87   2
  -3 -11 -19 65736.6 4044.37   2
  11 -14  19 64852.2 4299.15   1
 -11  -3  19 71646.2 4513.56   3
 -14   3  19 66137.6 4034.86   3
  14 -11  16 97851.8 4521.98   1
 -14  11 -16 98203.7 4888.87   4
 -11  14 -16 93919.6 5460.42   4
   3 -14 -16 90179.5 4650.35   2
  11 -14  16 87993.5 4673.06   1
 -11  -3  16 102647. 5178.62   3
 -14   3  16 91375.6 4598.56   3
 -11  14 -13 126604. 6040.97   4
 -14  11 -13 136502. 5607.19   4
 -11  -3  13 133852. 5055.58   1
   3 -14 -13 128000. 5843.79   2
  11 -14  13 128284. 5483.85   1
  -3 -11 -13 133976. 5392.00   3
  -3 -11 -13 129677. 6204.52   2
 -11  -3  13 144454. 6098.50   3
 -14   3  13 134412. 5535.63   3
  14 -11  13 133513. 5167.29   1
 -11  14 -10 68823.9 4104.61   4
  11 -14  10 70080.5 3694.82   1
   3 -14 -10 69619.4 4188.14   2
  -3 -11 -10 73175.1 4014.98   3
 -11  -3  10 72466.4 4124.96   3
  14 -11  10 71180.6 3333.44   1
 -14   3  10 68219.4 3633.47   3
  -3 -11  -7 11954.0 1769.76   3
   3 -14  -7 15221.9 2048.82   2
 -11  -3   7 15644.6 1962.73   3
 -14   3   7 15123.1 1776.49   3
 -11  14  -7 13523.0 1743.21   4
  11 -14   7 14763.0 1536.97   1
  11 -14   7 14344.4 1658.81   2
  14 -11   7 17037.6 1428.94   1
  -3 -11  -4 7768.74 1584.54   3
   3 -14  -4 6687.07 1491.99   2
 -11  -3   4 7655.20 1486.51   3
  11 -14   4 6895.51 1084.04   1
  14 -11   4 7069.52 845.356   1
  11 -14   4 8813.60 1401.66   2
  -3 -11  -1 8859.37 1676.76   3
   3 -14  -1 12457.7 1910.24   2
 -11  -3   1 11439.0 1637.05   3
   3  11   1 9218.63 936.646   4
  14 -11   1 10600.6 834.204   1
  11 -14   1 9144.18 1413.52   2
  -3 -11   2 24922.3 2619.29   3
   3  11  -2 26114.2 1865.50   4
  11 -14  -2 30562.7 2387.46   2
   3 -14   2 25406.0 2463.64   2
  14 -11  -2 27575.4 1081.39   1
  -3  14  -2 29045.9 2200.63   4
 -11  -3  -2 26150.8 2403.91   3
  -3 -11   5 3237.59 1284.01   3
   3 -14   5 2982.33 1093.41   2
 -11  -3  -5 5153.67 1222.70   3
   3  11  -5 3595.98 970.371   4
  -3  14  -5 2517.36 918.691   4
  11 -14  -5 3421.49 1092.65   2
  -3 -11   8 23124.4 2675.94   3
  11 -14  -8 25769.7 2242.98   2
  -3  14  -8 25765.0 2409.78   4
   3  11  -8 28162.9 2468.46   4
   3 -14   8 29389.0 2394.37   2
 -11  -3  -8 26269.6 2354.30   3
   3 -14  11 74018.1 3823.48   2
  11 -14 -11 75792.1 3866.58   2
   3  11 -11 82941.1 4639.35   4
  -3  14 -11 84740.7 4663.06   4
  -3 -11  11 73860.1 4610.67   3
 -11  -3 -11 82157.3 4106.24   3
   3 -14  14 49376.9 3664.88   1
  11 -14 -14 60105.8 3338.71   2
  -3  14 -14 54987.1 4080.06   4
   3  11 -14 50971.5 3868.05   4
   3 -14  14 53417.5 3044.87   2
  -3 -11  14 50002.2 3803.55   3
  -3 -11  14 54244.8 3408.90   2
  -3 -11  14 54294.7 3690.31   1
 -11  -3 -14 55701.5 3316.04   3
  -3  14 -17 66852.0 4865.94   4
  -3 -11  17 68040.2 4332.25   1
   3  11 -17 66186.6 4722.78   4
   3 -14  17 68119.7 4398.14   1
  11 -14 -17 70663.1 3610.12   2
  -3  14 -20 20417.9 2999.14   4
   3  11 -20 19214.9 2737.95   4
  -3 -11  20 21675.2 2670.19   1
   3 -14  20 24421.6 2886.99   1
   3 -14  23 34997.6 3568.65   1
  -3 -11  23 40414.6 3642.47   1
  -3  14 -23 27684.0 3526.26   4
   3  11 -23 33512.5 3718.08   4
  -3 -11  26 56538.9 4559.39   1
  14 -12  26 37804.1 3624.32   1
 -14  12 -26 29955.6 3567.53   4
  14 -12  23 48748.4 3814.39   1
 -14  12 -23 49949.2 4180.94   4
 -12  14 -23 46042.5 4477.46   4
  12 -14  23 41364.7 3777.70   1
  14 -12  20 38962.0 3168.26   1
 -14  12 -20 37487.8 3325.30   4
 -12  14 -20 37342.7 3687.94   4
   2 -14 -20 38154.4 2949.45   2
  -2 -12 -20 42431.2 3202.56   2
 -12  -2  20 42490.2 3533.77   3
  12 -14  20 38352.4 3385.15   1
 -14  12 -17 50823.6 3682.48   4
 -12  14 -17 54319.1 4209.77   4
   2 -14 -17 46524.1 3372.99   2
  -2 -12 -17 46538.3 3514.12   2
  12 -14  17 51006.7 3655.66   1
 -12  -2  17 56562.8 3862.65   3
 -14   2  17 56441.1 3646.31   3
  14 -12  17 56423.2 3566.53   1
 -14  12 -14 54443.0 3564.31   4
 -12  14 -14 55103.4 3900.75   4
  12 -14  14 52618.0 3424.27   1
  -2 -12 -14 52507.1 3791.64   2
   2 -14 -14 54887.0 3759.78   2
 -12  -2  14 55854.9 3660.52   3
  14 -12  14 57822.4 3361.39   1
 -14   2  14 58542.0 3612.26   3
 -14  12 -11 97931.0 4628.23   4
 -12  14 -11 94832.4 4881.81   4
 -12  -2  11 97821.8 3983.53   1
  12 -14  11 97144.1 4406.62   1
   2 -14 -11 94739.4 5064.95   2
  -2 -12 -11 94156.5 4577.41   3
  -2 -12 -11 95396.6 5323.00   2
  14 -12  11 95331.8 4155.00   1
 -12  -2  11 94846.1 4845.32   3
 -14   2  11 90485.1 4506.59   3
  -2 -12  -8 21827.6 2257.65   3
  -2 -12  -8 15809.9 2228.99   2
   2 -14  -8 12744.8 2020.36   2
 -12  -2   8 16304.1 2027.29   3
 -14   2   8 16099.0 1886.57   3
 -12  14  -8 17182.1 2040.75   4
  14 -12   8 16698.7 1532.77   1
  12 -14   8 14375.0 1582.35   1
  -2 -12  -5 5913.56 1521.39   3
   2 -14  -5 2965.67 1398.35   2
 -12  -2   5 5906.38 1338.28   3
 -14   2   5 4046.72 1209.98   3
  14 -12   5 4551.77 833.946   1
  12 -14   5 4399.56 969.940   1
  -2 -12  -2 15502.2 2141.05   3
   2 -14  -2 14851.0 2034.84   2
 -12  -2   2 11513.4 1597.77   3
 -14   2   2 14838.8 1838.47   3
  12 -14   2 16255.0 1450.58   1
  14 -12   2 14353.7 1107.26   1
  12 -14   2 14863.1 1747.92   2
   2  12   2 13397.3 1152.82   4
  -2 -12   1 6777.29 1566.96   3
  14 -12  -1 7630.77 702.436   1
   2 -14   1 6890.59 1534.34   2
 -12  -2  -1 4446.55 1234.06   3
  -2  14  -1 5273.23 1067.06   4
   2  12  -1 7334.57 1017.75   4
  12 -14  -1 8962.22 1501.01   2
  -2  14  -4 42558.4 2795.74   4
   2  12  -4 44631.0 2708.42   4
  12 -14  -4 44199.5 2937.04   2
   2 -14   4 44459.2 3242.93   2
  -2 -12   4 40428.8 3425.37   3
 -12  -2  -4 42002.3 2985.92   3
  12 -14  -7 53830.5 3279.87   2
   2  12  -7 57032.7 3391.11   4
   2 -14   7 57663.7 3547.41   2
  -2 -12   7 57675.0 4078.96   3
  -2 -12   7 59355.5 3908.95   2
 -12  -2  -7 58124.4 3491.77   3
  -2  14  -7 57293.2 3502.33   4
   2  12 -10 66025.6 3994.82   4
  12 -14 -10 66075.7 3579.24   2
  -2  14 -10 61979.5 3960.18   4
   2 -14  10 65788.5 3675.28   2
  -2 -12  10 68653.5 4435.17   3
  -2 -12  10 66582.9 4033.11   2
 -12  -2 -10 63846.5 3659.80   3
   2 -14  13 100413. 5339.17   1
  12 -14 -13 102702. 4594.32   2
  -2  14 -13 116276. 5824.07   4
   2  12 -13 98284.5 5402.16   4
   2 -14  13 113483. 4754.28   2
  -2 -12  13 95550.0 4828.79   2
 -12  -2 -13 105066. 4816.21   3
  -2 -12  16 169563. 7236.68   1
  -2  14 -16 183480. 8089.45   4
   2 -14  16 163846. 7258.82   1
   2  12 -16 154716. 7518.54   4
  -2 -12  16 181902. 6531.92   2
 -12  -2 -16 182720. 6604.33   3
  -2  14 -19 65693.0 4956.23   4
   2  12 -19 65152.9 4961.16   4
  -2 -12  19 71132.9 4610.25   1
   2 -14  19 72519.3 4724.38   1
  -2 -12  22 28932.2 3204.51   1
  -2  14 -22 27922.3 3552.51   4
   2  12 -22 17943.0 2893.79   4
   2 -14  22 25187.3 3073.83   1
  -2 -12  25 14308.5 2353.35   1
   2 -14  25 22391.1 2999.27   1
   2  12 -25 23426.6 3333.37   4
  13 -14  24-806.063 1233.09   1
 -14  13 -24 83.0836 1130.48   4
 -13  14 -24-125.249 1509.75   4
  14 -13  24 993.714 1331.94   1
   1 -14 -21-210.321 1108.11   2
  14 -13  21 2604.10 1290.54   1
 -14  13 -21-925.172 1422.07   4
 -13  14 -21 1532.65 1287.52   4
  13 -14  21-703.740 1397.40   1
  14 -13  18 10115.4 1712.75   1
   1 -14 -18 14186.4 1961.13   2
  -1 -13 -18 15193.1 2081.50   2
 -13  -1  18 13980.0 2061.04   3
 -14   1  18 14265.0 2022.46   3
 -13  14 -18 12371.1 2144.54   4
 -14  13 -18 15816.8 2227.85   4
  13 -14  18 12636.2 1998.48   1
   1 -14 -15 24329.1 2538.49   2
  -1 -13 -15 21974.8 2507.52   2
 -14   1  15 23264.1 2405.98   3
  13 -14  15 22609.2 2322.93   1
 -14  13 -15 25987.4 2688.69   4
 -13  14 -15 23583.9 2669.59   4
 -13  -1  15 27968.1 2677.47   3
  14 -13  15 23865.1 2347.44   1
   1 -14 -12 6828.08 1721.61   2
  -1 -13 -12 10787.7 1849.95   2
 -13  -1  12 11003.7 1709.87   3
 -14   1  12 7047.49 1451.74   3
 -13  14 -12 9624.51 1719.12   4
 -14  13 -12 11992.9 1834.55   4
  14 -13  12 8367.23 1418.38   1
  13 -14  12 9141.94 1476.67   1
 -13  14  -9 4159.67 1234.41   4
  13 -14   9 4043.53 1001.74   1
   1 -14  -9 6977.08 1686.36   2
 -13  -1   9 1788.42 908.319   3
  -1 -13  -9 5863.79 1742.38   2
 -14   1   9 3463.85 1150.41   3
  14 -13   9 6914.55 1165.79   1
  -1 -13  -6 2861.66 1063.99   3
   1 -14  -6 2487.92 1287.26   2
 -13  -1   6 4218.60 1101.74   3
  -1 -13  -6 2993.69 1400.36   2
 -14   1   6 1622.44 1007.98   3
  14 -13   6 3029.17 817.313   1
  13 -14   6 3628.53 897.186   1
  -1 -13  -3 881.146 964.906   3
  14 -13   3 1206.33 513.363   1
   1 -14  -3 382.121 1086.91   2
 -13  -1   3 322.254 1021.30   3
  -1 -13  -3 530.164 1208.98   2
 -14   1   3 2577.48 1179.31   3
  13 -14   3 1011.70 593.802   1
  -1 -13   0 847.090 1015.85   3
   1 -14   0-379.942 1079.22   2
 -13  -1   0 2070.82 1064.17   3
 -14   1   0 328.087 832.225   3
  -1 -13   0 2731.75 1196.68   2
  -1  14   0 173.443 623.021   4
   1  13   0 746.356 583.240   4
  13 -14   0 564.951 511.672   1
  14 -13   0 1064.19 444.440   1
  -1 -13   3 18487.9 2330.99   3
 -13  -1  -3 16933.0 1941.95   3
   1 -14   3 14500.2 1957.92   2
  -1 -13   3 15346.3 2177.20   2
 -14   1  -3 17796.2 1979.15   3
  14 -13  -3 16473.1 1066.12   1
  -1  14  -3 15235.5 1667.69   4
   1  13  -3 14301.2 1499.82   4
   1 -14   6 3611.85 1329.84   2
 -13  -1  -6 2450.33 1039.12   3
 -14   1  -6 2759.02 1204.92   3
  -1  14  -6 2685.51 1009.32   4
   1  13  -6 1746.49 852.666   4
   1 -14   9 2966.74 1182.27   2
  -1 -13   9 1127.42 1003.87   2
 -13  -1  -9 2994.37 1035.32   3
 -14   1  -9 2127.15 1006.03   3
  -1  14  -9 5029.17 1375.84   4
   1  13  -9 3323.41 1234.76   4
 -14   1 -12 23906.9 2277.56   3
  -1 -13  12 20817.3 2240.96   2
  -1  14 -12 21674.1 2509.25   4
   1  13 -12 23160.1 2568.34   4
   1 -14  12 26545.7 2381.58   2
 -13  -1 -12 23595.3 2236.78   3
 -14   1 -15 23617.9 2243.74   3
   1 -14  15 22556.3 2652.10   1
  -1 -13  15 18092.7 2332.01   1
   1 -14  15 24473.3 2162.33   2
  -1  14 -15 25525.8 2979.42   4
   1  13 -15 23451.1 2900.16   4
  -1 -13  15 25834.5 2285.71   2
 -13  -1 -15 20597.7 2062.81   3
 -14   1 -18 531.177 872.331   3
  -1  14 -18 962.393 1481.92   4
   1  13 -18 1329.85 1512.40   4
  -1 -13  18 1608.51 1258.29   1
   1 -14  18 944.808 1282.07   1
  -1  14 -21-783.824 1555.98   4
   1  13 -21 1172.90 1302.50   4
  -1 -13  21 2527.39 1541.43   1
   1 -14  21 796.691 1263.47   1
  -1 -13  24 2746.15 1644.35   1
   1 -14  24-135.716 1176.91   1
  -1  14 -24 210.646 1448.20   4
   1  13 -24 1319.09 1407.85   4
  14 -14  25 3808.85 1557.16   1
 -14  14 -25 4416.42 1640.65   4
  14 -14  22 4982.93 1625.30   1
 -14  14 -22 3738.97 1627.67   4
   0 -14 -19 6729.73 1638.27   2
 -14   0  19 7885.50 1751.27   3
 -14  14 -19 4205.77 1602.42   4
  14 -14  19 5300.51 1477.47   1
 -14  14 -16 37287.7 3342.54   4
   0 -14 -16 35948.5 3167.67   2
  14 -14  16 38807.7 3065.82   1
 -14   0  16 43843.3 3376.04   3
   0 -14 -13 73118.2 4540.47   2
  14 -14  13 81191.1 4150.67   1
 -14  14 -13 77026.4 4482.06   4
 -14   0  13 70150.3 4256.82   3
 -14  14 -10 136742. 5861.03   4
   0 -14 -10 128983. 6375.31   2
  14 -14  10 130003. 5128.15   1
 -14   0  10 130731. 5783.26   3
  14 -14   7 34414.8 2291.53   1
   0 -14  -7 34285.7 3294.61   2
 -14   0   7 39769.1 3035.75   3
  14 -14   4 79443.7 3337.41   1
   0 -14  -4 77999.0 4879.06   2
 -14   0   4 77469.4 4223.52   3
   0 -14  -1 25007.1 2777.89   2
  14 -14   1 25651.3 1682.32   1
   0  14   1 27928.4 1900.55   4
 -14   0   1 27273.6 2507.15   3
   0  14  -2 84101.5 3772.79   4
  14 -14  -2 80199.2 2996.77   1
   0 -14   2 85693.4 4985.81   2
 -14   0  -2 79754.6 4227.43   3
   0  14  -5 83409.4 4098.04   4
   0 -14   5 84596.4 4862.99   2
 -14   0  -5 86259.7 4386.25   3
   0  14  -8 66145.7 3885.06   4
   0 -14   8 60215.0 3936.03   2
 -14   0  -8 59719.8 3629.10   3
   0 -14  11 3626.91 1257.33   2
   0  14 -11 3562.43 1379.80   4
 -14   0 -11 2708.31 997.656   3
   0 -14  14 2380.37 1000.85   2
 -14   0 -14 1994.79 1159.53   3
   0 -14  14 2427.98 1365.02   1
   0  14 -14-1365.65 1463.14   4
 -14   0 -17 1441.68 970.798   3
   0  14 -17-245.281 1573.19   4
   0 -14  17-698.496 1308.99   1
   0  14 -20 8758.21 2177.14   4
   0 -14  20 8740.48 1881.70   1
   0  14 -23 1247.48 1472.16   4
   0 -14  23 3731.12 1805.14   1
  -8  -7  23 11477.3 1934.00   1
   8 -15  23 13989.3 2322.42   1
  -8  15 -23 12183.7 2547.33   4
  15  -8  23 13274.9 2031.15   1
   8   7 -23 15819.9 2617.42   4
  15  -8  20 1619.85 1152.60   1
  -8  -7  20 971.854 1092.70   3
   8 -15  20 821.516 1381.29   1
 -15   8 -20 1315.73 1012.74   4
  -8  15 -20 1492.44 1392.39   4
   8   7 -20 2150.08 1568.87   4
   7 -15 -20 1492.42 925.658   2
  -8  -7  20 1319.36 1002.59   1
 -15   7  17 1017.28 756.307   3
  -8  -7  17 306.314 1061.02   3
  15  -8  17-451.305 860.659   1
 -15   8 -17 109.361 773.813   4
  -8  15 -17 545.318 1293.05   4
   8   7 -17 1307.58 1291.12   4
  -8  -7  17-205.874 919.239   1
   7 -15 -17 2133.63 1095.64   2
   8 -15  17 297.792 1030.18   1
  -8  -7  14 8960.03 1724.01   3
  -7  -8 -14 9336.86 1538.22   3
 -15   7  14 12415.7 1610.79   3
  -8  15 -14 7918.95 1721.20   4
   8   7 -14 10221.2 1798.36   4
   8 -15  14 14020.4 2078.62   1
  -8  -7  14 10606.8 1670.75   1
   8 -15  14 11214.3 1455.41   2
   7 -15 -14 12027.2 1735.78   2
  15  -8  14 11211.8 1453.66   1
  15  -8  11 50503.6 2699.47   1
   8 -15  11 51014.9 2990.37   2
   8   7 -11 48950.8 3510.48   4
   7 -15 -11 52413.2 3387.63   2
  -8  15 -11 46879.2 3562.22   4
  -8  -7  11 52906.5 3739.98   3
  -7  -8 -11 53493.0 3404.15   3
   8 -15  11 50203.6 3428.18   1
  -8  15  -8 96676.3 4898.48   4
  15  -8   8 102976. 3701.64   1
   8 -15   8 98184.9 4438.73   2
   8   7  -8 96898.6 4694.22   4
   7 -15  -8 96338.9 4808.91   2
  -8  -7   8 102167. 5179.60   3
  -7  -8  -8 98364.9 4847.42   3
  -8  15  -5 60540.9 3591.50   4
   8   7  -5 61969.4 3348.36   4
   8 -15   5 56262.7 3363.48   2
   7 -15  -5 58467.5 3655.32   2
  -8  -7   5 65284.3 4028.27   3
  -7  -8  -5 57320.2 3683.87   3
   8   7  -2 164123. 5186.49   4
   8 -15   2 152445. 6049.28   2
   7 -15  -2 151044. 6183.80   2
  -7  -8  -2 152418. 6466.29   3
  -8  -7   2 171311. 6750.00   3
   8   7   1 171108. 4446.27   4
   7   8  -1 159245. 4925.90   4
   7 -15   1 173937. 6473.78   2
   8 -15  -1 151577. 6155.96   2
  -7  -8   1 163052. 6816.72   3
  -8  -7  -1 163501. 6643.29   3
  -7  15  -4 100642. 4660.73   4
   7   8  -4 102364. 4181.71   4
   8 -15  -4 98268.1 4736.60   2
  -7  -8   4 102821. 5238.09   3
  -8  -7  -4 106545. 5081.33   3
   7 -15   4 96824.8 4572.11   2
  -7  15  -7 100389. 4882.88   4
   7   8  -7 106318. 4740.61   4
   8 -15  -7 104757. 4923.04   2
   7 -15   7 102795. 4608.55   2
  -7  -8   7 103423. 5285.16   3
  -8  -7  -7 101850. 4965.18   3
   7 -15  10 139684. 5943.81   1
   7   8 -10 131218. 5854.62   4
   7 -15  10 128982. 5170.84   2
   8 -15 -10 141394. 5767.44   2
  -7  -8  10 122038. 5950.91   3
  -7  15 -10 120870. 5849.30   4
  -8  -7 -10 131747. 5631.94   3
   7 -15  13 46482.5 3393.59   1
   7 -15  13 42780.8 2689.86   2
   7   8 -13 36193.2 3198.46   4
   8 -15 -13 42357.3 3028.11   2
  -7  15 -13 41292.0 3514.59   4
  -7  -8  13 46479.9 3587.36   3
  -8  -7 -13 40534.8 2890.14   3
  -7  -8  16 1916.82 1261.53   3
 -15   8  16 4649.43 1086.03   3
  -7  15 -16 2289.71 1527.20   4
  -7  -8  16 3836.38 1163.27   1
   7   8 -16 5529.56 1714.41   4
   7 -15  16 3347.23 1467.97   1
   7 -15  16 3737.92 906.895   2
   8 -15 -16 2079.22 1038.74   2
   7 -15  19 8342.03 1803.79   1
  -7  -8  19 4838.35 1610.03   3
  -7  15 -19 5877.53 2040.56   4
   7   8 -19 7000.92 1822.59   4
  -7  -8  19 5916.33 1487.72   1
   8 -15 -19 5086.43 1199.00   2
  -7  -8  22-1556.65 1216.24   3
  -7  -8  22 1312.38 1142.07   1
   7 -15  22 712.708 1392.81   1
  -7  15 -22-10.7386 1411.56   4
   7   8 -22 643.534 1278.68   4
  -7  -8  25 497.041 1166.23   1
   7   8 -25 1230.73 1604.89   4
   7 -15  25-889.032 1649.21   1
  -9  15 -24 118289. 7336.80   4
  15  -9  24 122086. 6139.14   1
   9   6 -24 142230. 7496.16   4
   9 -15  24 120169. 6774.13   1
 -15   9 -21 162144. 6781.85   4
  15  -9  21 168435. 6871.81   1
  -9  15 -21 164970. 8421.04   4
   6 -15 -21 160416. 6261.23   2
   9   6 -21 184677. 8280.93   4
  -9  -6  21 166244. 6970.34   1
   9 -15  21 166493. 7605.46   1
  -9  -6  21 181088. 7878.63   3
 -15   9 -18 232762. 8096.10   4
  -9  15 -18 236932. 9886.39   4
   6 -15 -18 236636. 8098.22   2
   9   6 -18 258795. 9693.39   4
  -9  -6  18 256220. 8557.29   1
   9 -15  18 243644. 9003.54   1
  -9  -6  18 240757. 9154.44   3
  15  -9  18 240238. 8086.37   1
 -15   6  18 234380. 8037.71   3
  15  -9  15 219300. 7223.58   1
 -15   9 -15 212944. 7332.53   4
  -9  15 -15 220596. 8936.51   4
   9 -15  15 228897. 7175.59   2
  -9  -6  15 247175. 8051.71   1
   9   6 -15 236843. 8876.17   4
   6 -15 -15 211699. 7737.52   2
   9 -15  15 236500. 8392.86   1
  -9  -6  15 237926. 8679.30   3
 -15   6  15 216895. 7399.67   3
 -15   6  12 345375. 9781.92   3
  15  -9  12 341317. 9252.72   1
  -9  15 -12 337721. 11123.6   4
   9 -15  12 340339. 9622.05   2
   9 -15  12 338815. 10424.8   1
   9   6 -12 345606. 10944.5   4
   6 -15 -12 333476. 10389.5   2
  -6  -9 -12 345750. 10312.9   3
  -9  -6  12 341771. 10918.1   3
  -9  15  -9 244569. 8665.24   4
  15  -9   9 261509. 7054.99   1
   9 -15   9 264575. 8453.38   1
   9 -15   9 254290. 7909.96   2
   9   6  -9 250380. 8466.41   4
   6 -15  -9 243299. 8549.85   2
  -6  -9  -9 249698. 8568.78   3
  -9  -6   9 256884. 8968.68   3
  -9  15  -6 329644. 10073.3   4
  15  -9   6 336311. 8037.78   1
   9 -15   6 326152. 9625.75   2
   9   6  -6 328780. 9599.58   4
   6 -15  -6 322865. 10269.4   2
  -6  -9  -6 334801. 10467.3   3
  -9  -6   6 328656. 10412.3   3
   9 -15   3 155201. 5943.36   2
   9   6  -3 158526. 5350.28   4
   6 -15  -3 141916. 6134.26   2
  -6  -9  -3 156693. 6562.26   3
  -9  -6   3 152041. 6379.63   3
   6   9   0 190248. 5181.49   4
   9   6   0 183705. 5242.58   4
   9 -15   0 179721. 6696.89   2
   6 -15   0 179128. 6859.48   2
  -6  -9   0 182434. 7385.83   3
  -9  -6   0 193401. 7234.97   3
   6 -15   3 19975.2 2070.75   2
  -6  -9   3 21982.0 2428.01   3
  -6  15  -3 24730.8 2181.86   4
   6   9  -3 22519.1 1780.98   4
  -9  -6  -3 24540.5 2474.38   3
   9 -15  -3 22184.1 2216.76   2
  -6  -9   6 3887.09 1318.33   3
  -9  -6  -6 3151.89 1236.38   3
   6   9  -6 3322.51 945.724   4
  -6  15  -6 2961.55 1077.74   4
   9 -15  -6 1960.08 1073.93   2
   6 -15   6 2559.30 1001.72   2
  -6  -9   9 14855.1 2131.12   3
  -9  -6  -9 13322.9 1813.46   3
  -6  15  -9 14980.5 1958.97   4
   6   9  -9 14272.3 1921.72   4
   9 -15  -9 15309.0 1897.94   2
   6 -15   9 13750.0 1646.59   2
  -6  15 -12 33665.2 3089.74   4
   9 -15 -12 32816.2 2658.20   2
   6 -15  12 33120.7 2429.40   2
   6 -15  12 30402.0 2757.65   1
   6   9 -12 27063.1 2744.49   4
  -6  -9  12 34195.5 3121.20   3
  -9  -6 -12 33793.8 2678.63   3
  -6  15 -15 127178. 6484.03   4
  -6  -9  15 121566. 5584.75   1
   9 -15 -15 114956. 5053.06   2
   6 -15  15 109328. 5626.61   1
   6 -15  15 111642. 4626.50   2
  -6  -9  15 115838. 5962.25   3
   6   9 -15 107295. 5833.25   4
  -9  -6 -15 116435. 5053.62   3
  -6  15 -18 102517. 6172.40   4
   9 -15 -18 96826.5 4531.96   2
  -6  -9  18 94782.5 5116.52   1
   6   9 -18 98734.8 5779.88   4
   6 -15  18 96956.1 5514.20   1
  -6  -9  18 102637. 5636.97   3
  -6  15 -21 187417. 9112.29   4
   6   9 -21 195377. 8902.94   4
  -6  -9  21 204704. 8167.59   1
   6 -15  21 191815. 8368.43   1
  -6  15 -24 189110. 9625.95   4
  -6  -9  24 207468. 8706.64   1
   6 -15  24 208951. 9213.33   1
  -6  -9  27 233274. 9772.10   1
  15 -10  25 29211.2 3088.63   1
  10 -15  25 28621.9 3358.74   1
  10   5 -25 35214.3 3764.27   4
 -15  10 -22 54039.4 3906.84   4
  15 -10  22 57528.3 3927.03   1
  10   5 -22 62884.0 4760.57   4
  10 -15  22 57180.7 4396.97   1
 -10  -5  22 68898.7 4663.93   3
 -10  15 -22 56122.9 4785.04   4
 -10  -5  19 30023.9 3000.45   3
  15 -10  19 25263.5 2470.81   1
  -5 -10 -19 23938.9 2506.64   2
  10 -15  19 26437.0 2868.91   1
 -15  10 -19 26922.0 2652.13   4
   5 -15 -19 25157.7 2383.49   2
  10   5 -19 34851.3 3366.74   4
 -10  15 -19 25642.3 3239.01   4
  10 -15  16 17568.3 2170.39   1
 -10  15 -16 12285.7 2224.35   4
 -10  -5  16 18591.7 2367.54   3
 -15   5  16 15889.5 1890.23   3
  15 -10  16 15821.6 1826.38   1
 -15  10 -16 19027.4 2061.06   4
  10   5 -16 20293.0 2539.54   4
 -10  -5  16 17573.1 2026.20   1
   5 -15 -16 15841.7 1991.73   2
   5 -15 -13 18657.8 2137.58   2
  15 -10  13 15666.4 1627.98   1
  -5 -10 -13 16363.2 1874.31   3
 -10  -5  13 14727.4 2040.59   3
 -10  -5  13 17812.5 1926.38   1
 -10  15 -13 15743.8 2203.33   4
  10 -15  13 15152.5 1650.47   2
  10 -15  13 15860.5 2014.57   1
 -15   5  13 15998.8 1775.63   3
 -15   5  10 42109.2 2797.64   3
  15 -10  10 37662.2 2285.54   1
 -10  15 -10 37662.5 3094.64   4
  10 -15  10 39782.3 2655.68   2
  10 -15  10 35698.5 2712.76   1
   5 -15 -10 34404.2 2884.49   2
  -5 -10 -10 37619.5 2960.72   3
 -10  -5  10 37213.3 3091.31   3
   5 -15  -7 11070.0 1806.10   2
  -5 -10  -7 11609.5 1789.66   3
 -10  -5   7 8795.92 1523.55   3
  10 -15   7 13578.2 1725.88   1
  10 -15   7 9376.26 1454.37   2
  15 -10   7 10269.2 1101.28   1
 -10  15  -7 10316.3 1734.12   4
   5 -15  -4 11494.7 1737.57   2
  -5 -10  -4 15004.2 1969.11   3
  15 -10   4 15259.0 1101.54   1
 -10  -5   4 13072.7 1892.69   3
  10 -15   4 12842.7 1745.71   2
   5  10   1 45022.8 2008.89   4
  15 -10   1 49969.4 1664.59   1
  10 -15   1 46584.4 3086.03   2
  10   5  -1 47327.5 2437.55   4
   5 -15  -1 42939.2 3268.36   2
  -5 -10  -1 46169.7 3453.41   3
 -10  -5   1 47998.0 3342.75   3
   5 -15   2 23711.2 2370.61   2
  -5 -10   2 24725.6 2622.79   3
 -10  -5  -2 23052.4 2308.79   3
  -5  15  -2 25641.7 2192.98   4
  10 -15  -2 26688.1 2369.19   2
   5  10  -2 22823.0 1719.83   4
  -5  15  -5 117252. 5105.61   4
   5  10  -5 120392. 4767.76   4
  10 -15  -5 120400. 5229.56   2
   5 -15   5 114848. 5156.14   2
  -5 -10   5 121957. 5896.61   3
 -10  -5  -5 113882. 5290.93   3
  -5  15  -8 85521.7 4597.93   4
  10 -15  -8 94771.4 4559.22   2
   5 -15   8 92812.3 4414.18   2
  -5 -10   8 88675.2 5054.89   3
   5  10  -8 95209.4 4595.66   4
 -10  -5  -8 91803.1 4659.93   3
  -5  15 -11 180334. 7437.82   4
  10 -15 -11 190336. 6860.99   2
   5  10 -11 180079. 7281.83   4
   5 -15  11 185189. 6507.66   2
  -5 -10  11 189002. 7771.93   3
 -10  -5 -11 194171. 7047.66   3
  -5  15 -14 82901.8 5041.19   4
   5 -15  14 88538.4 4919.90   1
  10 -15 -14 78024.7 4050.19   2
   5  10 -14 70928.7 4663.39   4
   5 -15  14 75584.4 3758.44   2
  -5 -10  14 75302.3 4703.75   3
 -10  -5 -14 84135.0 4286.16   3
  -5  15 -17 130651. 6848.86   4
  10 -15 -17 121014. 5109.48   2
  -5 -10  17 132022. 6032.36   1
   5  10 -17 107379. 6196.97   4
   5 -15  17 114827. 5961.53   1
  -5 -10  17 123686. 6229.52   3
  10 -15 -20 42806.8 2878.42   2
   5  10 -20 48648.3 4230.83   4
  -5 -10  20 42733.6 3580.61   1
   5 -15  20 43374.7 3768.77   1
  -5  15 -20 43848.3 4118.41   4
   5  10 -23 45016.9 4320.36   4
  -5  15 -23 30890.8 3786.89   4
  -5 -10  23 37663.9 3509.61   1
   5 -15  23 39643.8 3752.29   1
  -5 -10  26 20655.8 2830.08   1
 -15  11 -23 33508.2 3252.43   4
  15 -11  23 34573.8 3139.74   1
 -11  15 -23 30930.3 3608.91   4
  11 -15  23 31161.5 3312.42   1
  11   4 -23 30331.2 3348.39   4
 -15  11 -20 80253.5 4758.87   4
  15 -11  20 88239.4 4683.67   1
 -11  15 -20 80908.8 5524.62   4
   4 -15 -20 75345.8 4246.90   2
  -4 -11 -20 70600.7 4330.14   2
  11 -15  20 83027.6 5086.41   1
 -11  -4  20 88770.6 5232.46   3
  15 -11  17 51101.0 3290.46   1
   4 -15 -17 48697.2 3425.21   2
 -15  11 -17 45639.6 3358.02   4
  11 -15  17 50635.2 3671.80   1
  -4 -11 -17 39444.8 3278.74   2
 -11  -4  17 57879.4 4047.23   3
 -11  15 -17 43797.4 3959.83   4
 -15   4  17 47342.3 3344.26   3
  15 -11  14 44862.1 2878.71   1
   4 -15 -14 46975.2 3426.77   2
 -15  11 -14 45873.1 3175.05   4
 -11  15 -14 45312.3 3729.15   4
 -11  -4  14 46918.5 2975.03   1
  11 -15  14 45740.0 3293.23   1
  -4 -11 -14 45040.1 2992.21   3
  -4 -11 -14 41463.3 3412.84   2
 -11  -4  14 51587.2 3658.74   3
 -15   4  14 46697.4 3168.81   3
   4 -15 -11-381.511 1177.48   2
  -4 -11 -11 1213.54 945.597   3
 -15   4  11 1330.47 814.596   3
 -11  -4  11 2782.70 1284.36   3
  15 -11  11 815.436 706.473   1
 -11  15 -11 1021.08 1082.03   4
  11 -15  11 376.193 854.884   1
  -4 -11  -8 1.55943 937.413   3
   4 -15  -8 1365.01 1210.64   2
 -11  -4   8 888.441 1172.86   3
  15 -11   8 68.9178 502.828   1
 -15   4   8 2544.80 1060.41   3
  11 -15   8 868.432 800.019   1
 -11  15  -8 1243.41 1006.80   4
  11 -15   8-169.241 801.525   2
  -4 -11  -5 4703.46 1381.99   3
   4 -15  -5 5147.50 1439.29   2
 -11  -4   5 5560.32 1398.45   3
  15 -11   5 5420.28 763.139   1
  11 -15   5 4644.35 1033.81   1
  11 -15   5 6234.67 1288.11   2
  -4 -11  -2 5601.93 1460.56   3
   4 -15  -2 4566.24 1503.99   2
 -11  -4   2 4607.94 1306.87   3
  15 -11   2 5124.56 617.541   1
   4  11   2 4618.85 620.052   4
  11 -15   2 5084.82 1177.59   2
  -4 -11   1 31840.1 2991.66   3
  -4  15  -1 39893.7 2592.54   4
   4  11  -1 33118.1 1983.79   4
  11 -15  -1 32423.6 2590.04   2
   4 -15   1 35124.0 2938.27   2
 -11  -4  -1 34734.4 2810.93   3
  -4 -11   4 14625.2 2213.57   3
   4 -15   4 18251.6 2147.26   2
 -11  -4  -4 16752.1 2017.70   3
   4  11  -4 17622.0 1697.17   4
  -4  15  -4 18034.6 1926.39   4
  11 -15  -4 14521.6 1874.96   2
  -4  15  -7 34175.7 2799.82   4
  11 -15  -7 37109.1 2795.84   2
   4  11  -7 40850.2 2812.09   4
   4 -15   7 38510.4 2900.60   2
  -4 -11   7 35793.3 3264.41   3
 -11  -4  -7 36093.5 2862.30   3
  -4  15 -10 81901.7 4640.79   4
  11 -15 -10 81742.7 4224.70   2
   4  11 -10 80537.6 4504.48   4
   4 -15  10 88346.9 4282.51   2
  -4 -11  10 83302.5 4975.08   3
 -11  -4 -10 84175.2 4378.18   3
  -4  15 -13 107411. 5755.28   4
  11 -15 -13 98933.0 4703.07   2
   4 -15  13 107634. 5541.73   1
   4  11 -13 110058. 5740.70   4
   4 -15  13 111621. 4722.71   2
  -4 -11  13 114044. 5886.05   3
 -11  -4 -13 111458. 5064.13   3
  -4 -11  16 43199.5 3438.76   1
  11 -15 -16 40790.8 2805.47   2
   4 -15  16 45140.8 3605.43   1
   4  11 -16 39372.5 3582.40   4
  -4  15 -16 36227.6 3629.57   4
  -4 -11  16 43768.7 3668.86   3
  -4 -11  16 42907.7 3087.67   2
 -11  -4 -16 42629.7 2969.79   3
  11 -15 -19 38969.3 2744.91   2
  -4  15 -19 46177.5 4344.36   4
  -4 -11  19 45073.6 3622.12   1
   4 -15  19 45898.5 3840.01   1
   4  11 -19 35647.7 3638.80   4
   4 -15  22 26776.4 3230.45   1
   4  11 -22 21277.5 2955.75   4
  -4 -11  22 32109.2 3216.52   1
  -4  15 -22 27885.9 3653.38   4
  -4 -11  25 28472.2 3130.25   1
  15 -12  24 11617.9 2041.35   1
 -15  12 -24 8805.74 1981.49   4
 -12  15 -24 16179.1 2729.57   4
  12   3 -24 10106.8 2178.66   4
  12 -15  24 8838.02 2105.25   1
 -12  -3  21 1883.19 1288.49   3
 -15  12 -21 851.645 1197.73   4
 -12  15 -21 1847.64 1514.57   4
  12 -15  21 1125.25 1289.24   1
  15 -12  21 2699.31 1385.47   1
   3 -15 -21-570.006 1006.34   2
   3 -15 -18 23036.1 2420.94   2
 -12  -3  18 27270.6 2809.28   3
  -3 -12 -18 18554.5 2323.42   2
 -15  12 -18 23158.4 2574.48   4
  12 -15  18 20754.5 2447.79   1
 -12  15 -18 25720.0 3072.63   4
  15 -12  18 20424.3 2243.39   1
 -15   3  18 26927.1 2665.96   3
  15 -12  15 65020.9 3622.17   1
 -15  12 -15 59173.7 3821.34   4
 -12  15 -15 65083.4 4447.30   4
   3 -15 -15 56581.9 3828.59   2
  12 -15  15 59411.0 3818.50   1
  -3 -12 -15 52197.0 3856.62   2
 -12  -3  15 61753.1 4067.46   3
 -15   3  15 56251.7 3643.79   3
 -12  15 -12 166264. 7103.05   4
 -12  -3  12 192392. 6231.16   1
 -15  12 -12 164695. 6529.09   4
  12 -15  12 173506. 6569.97   1
   3 -15 -12 180343. 7273.24   2
  -3 -12 -12 178207. 6740.49   3
  -3 -12 -12 163727. 7336.02   2
 -12  -3  12 169112. 6986.38   3
 -15   3  12 172592. 6653.63   3
  15 -12  12 179314. 6156.46   1
 -12  15  -9 194170. 7304.04   4
  12 -15   9 174247. 6447.72   1
   3 -15  -9 187889. 7616.24   2
  -3 -12  -9 184847. 7229.32   3
 -12  -3   9 189569. 7291.42   3
  15 -12   9 195144. 6062.82   1
 -15   3   9 183340. 6769.12   3
  12 -15   6 244443. 7672.86   1
   3 -15  -6 248296. 9135.49   2
  12 -15   6 253738. 8096.46   2
  -3 -12  -6 253762. 9063.80   3
  15 -12   6 256813. 7000.04   1
 -12  -3   6 256692. 8741.66   3
 -15   3   6 262623. 8318.04   3
 -15   3   3 214813. 7190.14   3
  12 -15   3 195173. 6332.42   1
  12 -15   3 187504. 6835.29   2
   3 -15  -3 198713. 7904.95   2
  -3 -12  -3 189146. 7762.92   3
  15 -12   3 194082. 5359.84   1
 -12  -3   3 195162. 7331.49   3
  -3  15   0 466514. 11936.0   4
   3  12   0 473899. 11061.3   4
  12 -15   0 473399. 12670.9   2
   3 -15   0 449957. 13491.0   2
  -3 -12   0 449967. 13853.8   3
 -12  -3   0 458537. 12993.2   3
  -3  15  -3 433423. 11574.9   4
   3  12  -3 421654. 10914.4   4
  12 -15  -3 413595. 11795.9   2
   3 -15   3 444144. 12667.5   2
  -3 -12   3 427379. 13228.1   3
 -12  -3  -3 425728. 12234.7   3
  -3  15  -6 319637. 9735.11   4
  12 -15  -6 306949. 9580.38   2
   3  12  -6 327064. 9494.79   4
   3 -15   6 319202. 10013.4   2
  -3 -12   6 315144. 10876.4   3
 -12  -3  -6 311511. 9866.95   3
  -3  15  -9 120033. 5638.89   4
  12 -15  -9 119126. 5242.98   2
   3  12  -9 127199. 5637.27   4
   3 -15   9 120622. 5313.29   2
  -3 -12   9 127664. 6316.23   3
 -12  -3  -9 116800. 5335.35   3
  -3  15 -12 132766. 6262.71   4
   3  12 -12 127137. 6081.70   4
   3 -15  12 127490. 5341.93   2
  -3 -12  12 120569. 6167.53   3
  12 -15 -12 116551. 5178.88   2
  -3 -12  12 123423. 5708.47   2
 -12  -3 -12 125030. 5487.99   3
  12 -15 -15 27389.1 2406.00   2
   3 -15  15 32012.6 3118.61   1
  -3 -12  15 28950.0 2837.25   1
   3 -15  15 29746.6 2321.96   2
  -3  15 -15 32251.4 3255.05   4
   3  12 -15 28450.0 3094.67   4
  -3 -12  15 28689.3 2521.84   2
 -12  -3 -15 29353.9 2531.84   3
  -3 -12  18 39706.5 3420.27   1
   3 -15  18 35551.4 3400.00   1
  -3  15 -18 36812.0 3693.75   4
   3  12 -18 33899.7 3496.46   4
  -3  15 -21-163.273 1472.13   4
   3  12 -21 1190.28 1509.13   4
  -3 -12  21 1121.56 1218.75   1
   3 -15  21-361.475 1440.77   1
  -3 -12  24 8139.60 1972.85   1
   3 -15  24 14017.1 2459.85   1
  -3  15 -24 9445.74 2389.96   4
   3  12 -24 7886.48 1969.34   4
  15 -13  25 34532.7 3396.00   1
 -15  13 -25 27005.6 3167.51   4
  15 -13  22 60708.1 4210.65   1
 -15  13 -22 59560.7 4549.66   4
  13 -15  22 66694.5 4723.65   1
 -13  15 -22 60443.6 4935.69   4
  15 -13  19 66623.0 4131.00   1
 -15  13 -19 64361.1 4495.75   4
 -13  15 -19 67060.7 4980.16   4
   2 -15 -19 67126.4 4210.98   2
  -2 -13 -19 64465.4 4194.14   2
  13 -15  19 65802.1 4391.99   1
 -13  -2  19 75441.6 4680.25   3
 -15   2  19 79316.8 4607.69   3
 -15  13 -16 80113.3 4734.18   4
 -13  15 -16 70558.1 4781.35   4
   2 -15 -16 77912.6 4615.60   2
  -2 -13 -16 68654.0 4458.61   2
  13 -15  16 73311.4 4350.89   1
 -13  -2  16 79415.6 4738.26   3
 -15   2  16 81523.8 4601.29   3
  15 -13  16 84318.3 4341.99   1
 -15  13 -13 86881.9 4653.50   4
 -13  15 -13 89151.3 4997.76   4
   2 -15 -13 89684.0 5014.80   2
  13 -15  13 89262.2 4511.29   1
  -2 -13 -13 81389.1 4969.10   2
 -13  -2  13 85859.4 4775.53   3
  15 -13  13 84814.1 4180.75   1
 -15   2  13 82307.6 4547.69   3
 -13  15 -10 155130. 6554.35   4
  13 -15  10 160364. 5977.19   1
   2 -15 -10 151224. 6888.73   2
  -2 -13 -10 153998. 6428.23   3
  -2 -13 -10 157868. 7269.38   2
  15 -13  10 168757. 5796.31   1
 -13  -2  10 154870. 6586.85   3
 -15   2  10 158237. 6333.74   3
  13 -15   7 83674.9 3896.34   1
   2 -15  -7 86939.4 5061.67   2
  -2 -13  -7 88163.8 4879.75   3
  -2 -13  -7 83289.5 5138.29   2
  15 -13   7 89578.3 3697.78   1
 -13  -2   7 83331.3 4525.62   3
 -15   2   7 90011.6 4500.33   3
  13 -15   4 41539.7 2490.16   1
   2 -15  -4 38673.3 3358.86   2
  15 -13   4 40308.0 2186.21   1
  -2 -13  -4 41429.1 3394.21   3
  -2 -13  -4 37757.3 3499.36   2
 -13  -2   4 42363.2 3193.87   3
  -2 -13  -1 11128.8 1936.93   3
   2 -15  -1 11876.7 1947.19   2
 -13  -2   1 11952.7 1804.77   3
  -2 -13  -1 8246.15 1808.39   2
 -15   2   1 10073.2 1676.48   3
   2  13   1 10179.9 1112.97   4
  13 -15   1 9761.65 1194.94   1
  15 -13   1 13970.2 1100.70   1
  13 -15   1 13048.1 1677.57   2
  -2 -13   2 9163.55 1903.41   3
   2 -15   2 11027.4 1890.61   2
 -13  -2  -2 10498.7 1745.00   3
  -2 -13   2 7894.15 1775.84   2
  -2  15  -2 11833.9 1539.23   4
   2  13  -2 10874.2 1296.10   4
 -15   2  -2 12434.5 1827.86   3
  13 -15  -2 10926.9 1662.75   2
  -2 -13   5 732.571 1125.68   3
   2 -15   5-530.522 905.881   2
 -13  -2  -5 899.115 891.625   3
  -2 -13   5 186.445 1150.05   2
  -2  15  -5-34.5017 908.894   4
   2  13  -5 273.547 716.882   4
  13 -15  -5-155.437 902.334   2
  -2 -13   8 1266.23 1239.49   3
   2 -15   8 1575.25 1015.81   2
  -2 -13   8 647.041 1033.69   2
 -13  -2  -8 701.219 877.837   3
  -2  15  -8 651.815 900.556   4
   2  13  -8-135.542 849.436   4
  13 -15  -8-302.509 863.779   2
  -2  15 -11 34454.5 3202.82   4
   2  13 -11 39239.4 3220.38   4
   2 -15  11 37059.2 2855.45   2
  -2 -13  11 38355.9 3060.75   2
 -13  -2 -11 34775.6 2841.11   3
   2 -15  14 19529.3 2015.51   2
  -2 -13  14 22747.3 2316.82   2
   2 -15  14 22207.5 2695.22   1
  -2  15 -14 23163.8 2750.67   4
   2  13 -14 21787.3 2659.46   4
 -13  -2 -14 23204.9 2338.48   3
 -15   2 -17 53762.9 3420.38   3
  -2  15 -17 57083.5 4611.28   4
  -2 -13  17 52126.5 3979.96   1
   2  13 -17 53667.9 4359.05   4
   2 -15  17 61786.7 4391.60   1
  -2  15 -20 72066.9 5398.96   4
   2  13 -20 68279.4 5201.54   4
  -2 -13  20 83619.1 5224.29   1
   2 -15  20 78960.0 5233.45   1
  -2  15 -23 74313.5 5778.68   4
   2  13 -23 64406.4 5296.46   4
  -2 -13  23 81163.9 5340.91   1
   2 -15  23 80404.8 5435.33   1
  14 -15  23 12866.0 2321.88   1
 -15  14 -23 18019.5 2739.54   4
  15 -14  23 15385.0 2420.83   1
 -14  15 -23 18413.4 2847.44   4
 -15  14 -20 49082.2 4163.89   4
 -14  15 -20 52457.4 4431.42   4
   1 -15 -20 45195.9 3432.13   2
  -1 -14 -20 49719.7 3697.02   2
 -14  -1  20 58342.3 4209.53   3
  14 -15  20 48619.3 3845.92   1
  15 -14  20 50479.4 3748.82   1
 -15  14 -17 37878.7 3383.96   4
 -14  15 -17 30726.1 3223.13   4
   1 -15 -17 33324.1 3006.93   2
  -1 -14 -17 33645.1 3143.58   2
  14 -15  17 36481.5 3129.91   1
 -14  -1  17 34848.5 3174.29   3
 -15   1  17 38394.7 3218.09   3
  15 -14  17 35861.9 2975.75   1
 -15  14 -14 101414. 5379.17   4
   1 -15 -14 101226. 5488.77   2
  -1 -14 -14 95159.6 5437.41   2
  14 -15  14 104852. 5005.38   1
 -14  15 -14 97325.9 5444.74   4
  15 -14  14 105663. 4950.37   1
 -14  -1  14 113433. 5529.48   3
 -15   1  14 101481. 5236.66   3
 -14  15 -11 86636.5 4886.90   4
   1 -15 -11 89136.2 5183.29   2
  14 -15  11 95381.1 4451.83   1
  -1 -14 -11 93812.2 5445.57   2
  15 -14  11 91607.6 4271.62   1
 -14  -1  11 95114.0 5021.03   3
 -15   1  11 88869.0 4741.17   3
  14 -15   8 108401. 4496.76   1
   1 -15  -8 111600. 5840.91   2
  -1 -14  -8 100955. 5785.17   2
  15 -14   8 101302. 4209.86   1
 -14  -1   8 99988.5 5128.82   3
 -15   1   8 98689.1 4969.79   3
  -1 -14  -5 36390.6 3413.68   2
  14 -15   5 35100.0 2303.84   1
  15 -14   5 40725.0 2311.30   1
   1 -15  -5 36961.2 3470.30   2
 -14  -1   5 39384.3 3122.18   3
 -15   1   5 37594.6 2966.88   3
  14 -15   2 51021.1 2640.75   1
  15 -14   2 52510.7 2411.38   1
   1 -15  -2 49235.5 3884.30   2
  -1 -14  -2 50135.7 4039.83   2
 -14  -1   2 53305.8 3593.72   3
 -15   1   2 53573.7 3496.46   3
   1 -15   1 26918.4 2753.09   2
  -1 -14   1 20420.1 2661.28   2
 -14  -1  -1 23116.5 2416.51   3
  -1  15  -1 26612.7 2097.89   4
   1  14  -1 26767.6 1977.03   4
  14 -15  -1 24598.5 1695.48   1
 -15   1  -1 26085.2 2573.70   3
   1 -15   4 18544.5 2442.96   2
  -1 -14   4 19614.9 2452.36   2
 -14  -1  -4 16751.0 2099.52   3
 -15   1  -4 18521.5 2070.08   3
  -1  15  -4 18301.8 1910.76   4
   1  14  -4 16950.9 1754.33   4
   1 -15   7 5086.68 1405.99   2
  -1 -14   7 5999.84 1507.97   2
 -14  -1  -7 5063.02 1296.74   3
 -15   1  -7 8707.73 1595.00   3
  -1  15  -7 5466.54 1264.56   4
   1  14  -7 5633.97 1417.76   4
   1 -15  10 540.882 927.267   2
  -1 -14  10 1425.89 1020.47   2
 -14  -1 -10 2666.26 1187.66   3
 -15   1 -10 1372.77 1102.14   3
  -1  15 -10 482.015 900.609   4
   1  14 -10 2509.38 1270.54   4
   1 -15  13 13132.7 1753.96   2
  -1 -14  13 9731.96 1596.09   2
 -14  -1 -13 8214.05 1569.17   3
 -15   1 -13 9443.01 1602.69   3
  -1  15 -13 9180.56 1913.78   4
   1  14 -13 9149.27 1927.44   4
 -15   1 -16 23283.7 2310.73   3
  -1 -14  16 20619.1 2602.00   1
   1 -15  16 24559.1 2866.72   1
  -1  15 -16 21053.2 2839.23   4
   1  14 -16 16970.7 2500.95   4
 -14  -1 -16 23155.5 2332.98   3
  -1  15 -19 23225.5 3112.16   4
   1  14 -19 24976.7 3112.31   4
  -1 -14  19 27543.0 3071.78   1
   1 -15  19 29064.6 3214.35   1
  -1  15 -22 28858.6 3613.13   4
   1  14 -22 25150.4 3328.15   4
  -1 -14  22 33993.9 3583.72   1
   1 -15  22 30541.1 3373.51   1
  15 -15  24 125366. 6648.07   1
 -15  15 -21 213538. 9450.76   4
  15 -15  21 223073. 8834.52   1
 -15  15 -18 184260. 8222.34   4
   0 -15 -18 168202. 7412.14   2
 -15   0  18 180974. 7711.90   3
  15 -15  18 186759. 7559.78   1
 -15  15 -15 81690.3 4942.60   4
   0 -15 -15 70465.5 4598.31   2
  15 -15  15 71960.4 4177.57   1
 -15   0  15 80417.3 4682.62   3
 -15  15 -12 34070.3 3127.25   4
 -15   0  12 25277.6 2619.16   3
   0 -15 -12 32764.2 3161.73   2
  15 -15  12 31306.1 2537.64   1
   0 -15  -9 3643.13 1560.15   2
 -15   0   9 5651.23 1478.81   3
  15 -15   9 5109.50 1119.71   1
  15 -15   6 9451.72 1267.64   1
   0 -15  -6 8328.42 1835.43   2
 -15   0   6 10881.5 1825.90   3
   0 -15  -3 13813.4 2257.22   2
 -15   0   3 12511.2 1830.90   3
  15 -15   3 11731.8 1240.86   1
   0 -15   0 24452.3 2857.75   2
 -15   0   0 22309.9 2373.95   3
   0  15   0 23325.0 1890.11   4
   0  15  -3 273312. 8389.89   4
   0 -15   3 280333. 10133.6   2
 -15   0  -3 272432. 9137.03   3
   0  15  -6 369347. 10808.6   4
   0 -15   6 376879. 11939.3   2
 -15   0  -6 355478. 10996.4   3
   0  15  -9 277912. 9372.19   4
   0 -15   9 293130. 9748.65   2
 -15   0  -9 269431. 9114.64   3
   0  15 -12 252448. 9376.65   4
   0 -15  12 267518. 8954.85   2
 -15   0 -12 247459. 8645.23   3
   0 -15  15 266453. 9992.33   1
   0  15 -15 260370. 10114.8   4
   0 -15  15 275447. 8909.34   2
 -15   0 -15 263316. 8921.27   3
   0  15 -18 175606. 8417.63   4
   0 -15  18 182125. 8134.99   1
   0  15 -21 121736. 7294.19   4
   0 -15  21 129772. 6949.83   1
  -8  -8   0 13859.0 2100.10   3
   8 -16   0 13111.7 1871.67   2
  -8  -8   3 138.192 1041.40   3
  -8  -8  -3-1158.03 994.307   3
  -8  16  -3 235.838 829.527   4
   8   8  -3 693.390 647.976   4
   8 -16   3 1225.59 1107.21   2
   8 -16  -3 374.152 888.541   2
  -8  -8   6 28597.4 2849.44   3
  -8  -8  -6 25097.1 2477.00   3
   8   8  -6 23490.0 2069.12   4
  -8  16  -6 20591.4 2234.14   4
   8 -16   6 21232.8 2157.43   2
   8 -16  -6 21433.4 2353.89   2
  -8  -8   9 5715.20 1496.75   3
  -8  -8  -9 4948.77 1314.14   3
   8 -16   9 7142.57 1429.98   1
  -8  16  -9 4874.08 1437.25   4
   8   8  -9 7105.30 1426.30   4
   8 -16   9 4576.22 1166.15   2
   8 -16  -9 4221.25 1245.75   2
  -8  -8  12 9464.10 1817.89   3
  -8  -8 -12 11410.8 1711.25   3
  -8  16 -12 8140.15 1722.51   4
   8 -16  12 11616.7 1930.03   1
   8   8 -12 9531.54 1728.65   4
   8 -16  12 10325.1 1448.33   2
   8 -16 -12 10235.3 1675.49   2
  -8  -8  15 4853.39 1421.98   3
 -16   8  15 3560.23 997.351   3
  -8  -8  15 3845.81 1231.58   1
   8   8 -15 3755.97 1336.47   4
   8 -16  15 4335.89 1499.90   1
   8 -16  15 2900.38 924.975   2
   8 -16 -15 4212.67 1289.82   2
  -8  -8  18 2712.88 1365.90   3
  -8  16 -18 2567.78 1602.67   4
   8   8 -18 3438.80 1531.71   4
  -8  -8  18 5302.04 1459.78   1
   8 -16 -18 5855.72 1408.96   2
   8 -16  18 7123.28 1843.58   1
  -8  -8  21 2261.78 1394.04   3
   8 -16  21 1913.78 1325.05   1
  -8  16 -21 354.585 1443.54   4
   8   8 -21 1832.31 1492.34   4
  -8  -8  21 5039.54 1547.40   1
   8 -16  24 3164.18 1487.04   1
   8   8 -24 6720.70 1947.23   4
  -9  16 -22 76196.9 5793.63   4
  16  -9  22 82113.7 4718.71   1
   9   7 -22 87155.8 5784.27   4
   9 -16  22 74153.1 5192.46   1
  -9  -7  22 81678.6 5295.76   3
 -16   9 -19 55342.4 3560.68   4
  -9  16 -19 56507.5 4595.81   4
  16  -9  19 54228.2 3540.77   1
   7 -16 -19 54991.5 3586.13   2
   9   7 -19 59942.8 4545.14   4
  -9  -7  19 65538.2 4102.95   1
   9 -16  19 55205.0 4204.11   1
  -9  -7  19 57228.0 4307.80   3
  16  -9  16 7141.89 1335.18   1
  -9  -7  16 4570.06 1460.97   3
 -16   7  16 6292.26 1410.79   3
  -9  16 -16 6143.59 1663.66   4
  -9  -7  16 6605.66 1437.54   1
   9   7 -16 3007.87 1511.51   4
   7 -16 -16 9186.17 1620.56   2
   9 -16  16 4211.44 1398.10   1
  -9  -7  13 16488.0 2336.38   3
  -7  -9 -13 14174.7 1826.53   3
 -16   7  13 17825.3 1911.87   3
  16  -9  13 21785.0 1907.10   1
  -9  16 -13 20347.3 2493.09   4
   9   7 -13 16864.3 2306.81   4
   9 -16  13 16698.4 2194.80   1
   9 -16  13 20655.4 1911.77   2
   7 -16 -13 19005.2 2213.43   2
  -7  -9 -10 11810.9 1743.29   3
  -9  -7  10 11545.7 1973.25   3
  16  -9  10 12686.2 1332.21   1
  -9  16 -10 8187.31 1760.19   4
   9 -16  10 10115.7 1712.29   1
   9   7 -10 9762.58 1702.12   4
   9 -16  10 10539.5 1570.38   2
   7 -16 -10 9386.64 1670.30   2
  -7  -9  -7 3670.87 1119.09   3
  -9  -7   7 3515.41 1286.98   3
  -9  16  -7 6009.92 1440.49   4
   9   7  -7 4475.15 1062.41   4
   9 -16   7 3455.08 1032.12   2
   7 -16  -7 3735.46 1105.08   2
  -7  -9  -4 23096.2 2467.70   3
  -9  -7   4 22117.3 2488.43   3
   9   7  -4 21449.7 1858.53   4
  -9  16  -4 24420.4 2332.65   4
   9 -16   4 20952.9 2201.12   2
   7 -16  -4 20657.9 2279.59   2
   9   7  -1 56121.1 2577.27   4
   9 -16   1 58202.3 3630.89   2
   7 -16  -1 55717.3 3659.30   2
  -7  -9  -1 61357.0 4010.43   3
  -9  -7   1 59010.2 3903.54   3
  -7  16  -2 127904. 5366.67   4
   7   9  -2 133492. 4582.42   4
   9 -16  -2 132208. 5718.73   2
   7 -16   2 127504. 5683.23   2
  -7  -9   2 134819. 6231.47   3
  -9  -7  -2 135777. 6096.69   3
   7   9  -5 93536.3 4185.40   4
   9 -16  -5 92555.1 4746.50   2
   7 -16   5 90041.7 4552.89   2
  -7  16  -5 106992. 4925.14   4
  -7  -9   5 100413. 5327.36   3
  -9  -7  -5 91262.4 4888.81   3
  -7  16  -8 156943. 6544.49   4
   7   9  -8 157819. 6198.01   4
   9 -16  -8 154954. 6329.97   2
   7 -16   8 150972. 5959.12   2
  -7  -9   8 156135. 6920.15   3
  -9  -7  -8 145631. 6348.79   3
  -7  16 -11 123449. 6101.39   4
   7 -16  11 123092. 5859.09   1
   7   9 -11 126854. 5909.30   4
   9 -16 -11 141518. 5879.29   2
   7 -16  11 130230. 5295.08   2
  -7  -9  11 128311. 6266.07   3
  -9  -7 -11 127422. 5717.32   3
  -7  16 -14 142680. 6988.86   4
   7 -16  14 154774. 6826.01   1
   7 -16  14 153985. 5774.10   2
   9 -16 -14 161289. 6329.79   2
   7   9 -14 141161. 6822.43   4
  -7  -9  14 158172. 7136.95   3
  -9  -7 -14 146403. 6054.21   3
  -7  16 -17 50942.9 4265.03   4
  -7  -9  17 59115.8 3944.86   1
   9 -16 -17 57365.1 3533.26   2
   7   9 -17 52368.3 4221.06   4
   7 -16  17 56824.7 4179.90   1
  -7  -9  17 48279.9 3967.43   3
  -7  16 -20 126774. 7308.80   4
   9 -16 -20 112473. 5157.46   2
   7   9 -20 126660. 6896.79   4
   7 -16  20 123005. 6479.43   1
  -7  -9  20 125332. 6565.68   3
  -7  -9  20 130734. 6241.41   1
   7   9 -23 50882.2 4511.11   4
  -7  16 -23 47180.2 4634.64   4
  -7  -9  23 55450.5 4179.76   1
   7 -16  23 56664.0 4571.55   1
  -7  -9  26 23674.1 3061.47   1
  16 -10  23 20856.0 2524.81   1
  10 -16  23 18345.7 2724.04   1
 -10  16 -23 20358.8 3105.71   4
  10   6 -23 27637.3 3249.34   4
 -10  -6  20 1246.78 1216.91   3
  -6 -10 -20 27.2989 943.828   2
  10 -16  20 3045.22 1472.18   1
  16 -10  20 1175.21 1004.24   1
 -16  10 -20 1638.92 1106.26   4
 -10  16 -20 295.771 1346.02   4
  10   6 -20 1434.92 1444.99   4
   6 -16 -20 3040.79 1204.86   2
  10 -16  17 28436.6 2958.27   1
 -10  -6  17 27674.0 2963.29   3
 -16   6  17 21457.0 2245.30   3
 -16  10 -17 24791.5 2394.98   4
  16 -10  17 27354.2 2403.83   1
 -10  -6  17 27135.2 2445.19   1
 -10  16 -17 22624.9 2920.68   4
  10   6 -17 29648.3 3165.94   4
   6 -16 -17 23182.5 2433.81   2
  16 -10  14 50334.0 2984.06   1
 -10  16 -14 51658.5 4057.68   4
 -10  -6  14 58182.4 3519.33   1
  10 -16  14 49345.5 3061.00   2
  10   6 -14 61691.7 4162.18   4
   6 -16 -14 51063.7 3548.12   2
  10 -16  14 52560.6 3649.63   1
  -6 -10 -14 47142.6 3242.80   3
 -10  -6  14 57236.9 4032.00   3
 -16   6  14 49742.4 3225.36   3
  -6 -10 -11 16657.5 1995.79   3
 -10  -6  11 17860.8 2340.16   3
  16 -10  11 16641.7 1610.79   1
 -16   6  11 18567.5 1975.28   3
 -10  16 -11 17680.0 2250.84   4
  10   6 -11 21100.9 2350.77   4
  10 -16  11 15708.6 1961.16   1
  10 -16  11 15112.6 1749.12   2
   6 -16 -11 16183.9 2111.89   2
   6 -16  -8 19901.3 2304.76   2
  -6 -10  -8 20848.6 2398.16   3
 -10  -6   8 20159.3 2379.02   3
  16 -10   8 17739.0 1475.60   1
  10 -16   8 26291.3 2395.29   1
  10 -16   8 22274.3 2172.87   2
 -10  16  -8 20866.2 2335.10   4
  10   6  -8 21731.2 2141.02   4
  16 -10   5 113777. 3542.95   1
  10 -16   5 104457. 4849.53   2
  10   6  -5 107639. 4592.30   4
   6 -16  -5 97837.8 5188.37   2
 -10  16  -5 105334. 5092.99   4
  -6 -10  -5 106378. 5437.26   3
 -10  -6   5 108460. 5420.46   3
  10 -16   2 268214. 8682.84   2
  10   6  -2 265793. 7469.49   4
   6 -16  -2 260629. 9119.03   2
  -6 -10  -2 255946. 9350.60   3
 -10  -6   2 280060. 9362.05   3
   6  10  -1 245893. 6600.27   4
  10 -16  -1 239696. 8182.21   2
   6 -16   1 235083. 8361.28   2
  -6 -10   1 234888. 8900.66   3
 -10  -6  -1 232063. 8496.88   3
   6 -16   4 185574. 6969.82   2
  -6  16  -4 181648. 6801.40   4
   6  10  -4 189986. 6149.90   4
  10 -16  -4 171800. 6834.97   2
  -6 -10   4 176573. 7564.22   3
 -10  -6  -4 179381. 7189.29   3
   6  10  -7 69792.9 3735.98   4
  10 -16  -7 64069.1 3842.05   2
   6 -16   7 61897.1 3703.80   2
  -6  16  -7 59876.9 3815.31   4
  -6 -10   7 65309.5 4372.63   3
 -10  -6  -7 66034.1 4022.17   3
  -6 -10  10 15711.5 2208.38   3
 -10  -6 -10 14453.9 2004.97   3
  -6  16 -10 14133.2 2146.06   4
   6  10 -10 15782.2 2023.42   4
  10 -16 -10 15589.1 1980.56   2
   6 -16  10 12085.2 1653.66   2
  -6  16 -13 60616.4 4309.80   4
   6 -16  13 65199.5 4270.50   1
  10 -16 -13 67398.0 3885.81   2
   6  10 -13 57221.1 4093.05   4
   6 -16  13 69138.2 3663.70   2
  -6 -10  13 66943.2 4551.06   3
 -10  -6 -13 68399.5 3948.85   3
  -6  16 -16 78669.0 5263.77   4
  -6 -10  16 81052.9 4663.29   1
  10 -16 -16 75523.4 4137.62   2
   6  10 -16 79519.9 5208.60   4
   6 -16  16 81009.6 4926.05   1
  -6 -10  16 82335.6 5118.65   3
  -6 -10  19 20432.6 2718.39   3
  -6  16 -19 14607.2 2663.49   4
   6  10 -19 12435.6 2306.46   4
  -6 -10  19 20206.4 2415.80   1
  10 -16 -19 18951.0 2086.40   2
   6 -16  19 22607.3 2783.11   1
   6 -16  22 1071.62 1375.72   1
  -6  16 -22-203.011 1328.20   4
   6  10 -22-729.638 1492.17   4
  -6 -10  22 3554.25 1677.56   1
  -6 -10  25 3270.27 1401.90   1
  16 -11  24 2061.75 1299.89   1
  11 -16  24-604.806 1544.44   1
 -11  -5  21 1571.74 1294.49   3
  11 -16  21 511.458 1254.38   1
 -16  11 -21 894.022 1017.03   4
 -11  16 -21 499.048 1571.02   4
  11   5 -21 2167.67 1593.34   4
  16 -11  21-17.8649 1080.63   1
   5 -16 -21 151.533 792.906   2
 -11  -5  18 967.668 1180.69   3
 -16   5  18 761.823 903.563   3
  11 -16  18 1449.23 1273.36   1
  -5 -11 -18 2401.74 1123.01   2
  16 -11  18 3078.99 1218.21   1
 -16  11 -18-724.768 1059.10   4
 -11  16 -18-1200.20 1698.43   4
  11   5 -18 2015.42 1545.59   4
   5 -16 -18 504.656 1022.56   2
  11 -16  15 5016.31 1407.71   1
 -11  -5  15 4592.43 1544.79   3
  16 -11  15 4915.01 1190.29   1
 -16   5  15 6161.52 1313.25   3
 -11  16 -15 5672.62 1519.56   4
 -11  -5  15 5202.30 1246.59   1
   5 -16 -15 4911.68 1422.89   2
   5 -16 -12 632.408 1150.83   2
  -5 -11 -12 1061.57 876.160   3
 -11  -5  12 543.137 1180.15   3
 -16   5  12 1913.32 1030.54   3
 -11  16 -12 843.821 1283.35   4
  11 -16  12 2537.93 902.640   2
  11 -16  12 958.967 881.813   1
  16 -11  12 1959.79 783.429   1
   5 -16  -9 4574.89 1315.27   2
  -5 -11  -9 5345.10 1322.74   3
 -11  -5   9 3915.78 1211.33   3
 -16   5   9 4894.36 1344.35   3
 -11  16  -9 7443.86 1592.37   4
  11 -16   9 4883.11 1284.78   1
  11 -16   9 5457.27 1155.08   2
  16 -11   9 5132.87 932.795   1
   5 -16  -6 3171.73 1270.45   2
  -5 -11  -6 5301.71 1402.69   3
 -11  -5   6 8019.66 1738.10   3
 -11  16  -6 5821.85 1592.33   4
  11 -16   6 6095.82 1237.42   1
  11 -16   6 5158.66 1271.97   2
  16 -11   6 4850.65 847.163   1
   5 -16  -3 5668.21 1425.15   2
  -5 -11  -3 8609.87 1718.92   3
 -11  -5   3 10516.2 1863.88   3
  11   5  -3 8902.66 1198.05   4
  11 -16   3 8056.14 1561.88   2
   5 -16   0 2994.67 1120.71   2
  -5 -11   0 5901.55 1648.21   3
 -11  -5   0 7162.82 1626.48   3
  11 -16   0 4884.29 1144.00   2
   5 -16   3 22695.9 2404.51   2
  -5 -11   3 22151.6 2640.37   3
 -11  -5  -3 23287.8 2476.13   3
  -5  16  -3 21643.2 2151.04   4
   5  11  -3 22428.9 1818.55   4
  11 -16  -3 20730.0 2248.36   2
   5 -16   6 5041.40 1297.75   2
  -5 -11   6 1617.55 1179.06   3
 -11  -5  -6-356.200 1238.42   3
  -5  16  -6 3028.52 1059.63   4
   5  11  -6 1014.52 739.495   4
  11 -16  -6 2384.41 1042.03   2
   5 -16   9 244.700 955.120   2
  -5 -11   9 759.104 1302.04   3
 -11  -5  -9 218.238 1034.12   3
  -5  16  -9 707.130 1009.81   4
   5  11  -9 1113.49 977.342   4
  11 -16  -9 420.453 933.368   2
  -5 -11  12 6846.90 1717.93   3
 -11  -5 -12 7436.55 1502.24   3
   5 -16  12 8207.89 1784.41   1
  -5  16 -12 9007.27 1870.43   4
   5  11 -12 9127.71 1724.26   4
  11 -16 -12 7117.36 1497.18   2
   5 -16  12 6615.51 1303.97   2
  -5 -11  15 6498.39 1755.21   3
 -11  -5 -15 4620.15 1294.36   3
  -5 -11  15 5577.15 1553.73   1
  -5  16 -15 8118.16 2002.05   4
   5 -16  15 3657.05 1427.30   1
   5  11 -15 4898.04 1507.03   4
  11 -16 -15 6373.17 1466.92   2
   5 -16  15 6552.54 1256.03   2
  -5  16 -18 3291.97 1817.28   4
   5  11 -18 2202.68 1588.96   4
  -5 -11  18-1065.31 1186.98   1
  11 -16 -18 847.675 905.399   2
   5 -16  18-376.707 1185.29   1
  -5  16 -21 6340.67 1989.92   4
   5  11 -21 5267.36 1574.62   4
  -5 -11  21 6915.93 1732.18   1
   5 -16  21 9413.96 2010.06   1
  -5 -11  24 2276.03 1414.59   1
   5  11 -24 1882.09 1721.99   4
  16 -12  25 42492.6 3704.92   1
 -12  16 -22 84602.9 6031.57   4
  16 -12  22 70086.9 4535.54   1
 -16  12 -22 71178.9 4752.64   4
  12   4 -22 79822.2 5369.05   4
  12 -16  22 77918.3 5254.04   1
 -12  16 -19 111044. 6618.24   4
  16 -12  19 104000. 5211.28   1
 -16  12 -19 107778. 5613.72   4
   4 -16 -19 108107. 5374.65   2
  -4 -12 -19 99339.4 5407.97   2
  12 -16  19 100371. 5660.41   1
 -12  -4  19 116861. 6106.64   3
  16 -12  16 86039.3 4375.52   1
 -12  16 -16 87962.5 5535.92   4
   4 -16 -16 89926.9 4962.57   2
  12 -16  16 94919.8 5037.97   1
  -4 -12 -16 82663.7 5001.83   2
 -12  -4  16 98820.3 5395.47   3
 -16   4  16 99097.7 5001.17   3
 -16  12 -16 93172.2 4889.03   4
  16 -12  13 92675.3 4305.05   1
 -12  16 -13 98543.4 5436.76   4
   4 -16 -13 105236. 5443.49   2
  12 -16  13 100267. 4948.33   1
  -4 -12 -13 101571. 4896.15   3
  -4 -12 -13 102208. 5651.35   2
 -12  -4  13 110027. 5520.83   3
 -16   4  13 97390.9 4879.26   3
  16 -12  10 76381.3 3467.46   1
 -12  16 -10 71600.0 4379.10   4
  12 -16  10 74421.6 4029.34   1
   4 -16 -10 71410.2 4471.87   2
  -4 -12 -10 74968.6 4365.52   3
 -12  -4  10 74977.0 4460.29   3
 -16   4  10 70677.0 3952.13   3
 -16   4   7 115129. 5157.42   3
  16 -12   7 109254. 3995.22   1
 -12  16  -7 110281. 5301.53   4
  12 -16   7 102656. 4850.28   2
  12 -16   7 117119. 4927.34   1
   4 -16  -7 110165. 5733.97   2
  -4 -12  -7 111486. 5632.71   3
 -12  -4   7 119852. 5700.60   3
  12 -16   4 66299.1 3475.78   1
  12 -16   4 61548.4 3653.17   2
   4 -16  -4 59565.5 4131.64   2
  -4 -12  -4 72494.9 4540.11   3
 -12  -4   4 68313.2 4217.39   3
  -4 -12  -1 32570.8 3116.50   3
  12 -16   1 31831.8 2689.53   2
   4 -16  -1 30378.9 2936.13   2
 -12  -4   1 36440.8 3037.98   3
  -4 -12   2 229.067 1141.76   3
   4 -16   2 1206.94 1051.80   2
 -12  -4  -2 1348.73 1178.98   3
  -4  16  -2 1000.10 862.423   4
   4  12  -2 680.945 526.530   4
  12 -16  -2 1565.42 1153.08   2
  -4 -12   5 1757.47 1221.93   3
   4 -16   5 4135.04 1338.51   2
 -12  -4  -5 1323.55 961.250   3
  -4  16  -5 662.218 916.735   4
   4  12  -5 3223.64 970.200   4
  12 -16  -5 1708.19 973.401   2
  -4 -12   8-258.091 1312.71   3
   4 -16   8 1086.96 973.019   2
 -12  -4  -8 1239.22 871.450   3
  -4  16  -8 2242.92 1228.33   4
   4  12  -8 1985.47 965.903   4
  12 -16  -8 2801.77 1251.78   2
   4 -16  11 17480.2 2053.67   2
  -4 -12  11 21135.7 2646.38   3
 -12  -4 -11 13917.0 1919.47   3
  -4  16 -11 17826.0 2343.14   4
   4  12 -11 17844.2 2172.78   4
  12 -16 -11 18417.2 2059.20   2
   4 -16  14 54497.9 4063.82   1
  -4  16 -14 55680.6 4241.35   4
  12 -16 -14 45762.6 3208.05   2
   4  12 -14 47382.1 3869.60   4
   4 -16  14 47696.5 3116.86   2
  -4 -12  14 51495.9 4066.63   3
  -4 -12  14 53509.4 3631.37   2
 -12  -4 -14 53659.0 3581.93   3
  12 -16 -17 56386.5 3471.25   2
  -4  16 -17 48156.3 4139.56   4
  -4 -12  17 52451.2 3956.34   1
   4  12 -17 49983.0 4169.88   4
   4 -16  17 55424.1 4273.04   1
  -4  16 -20 72141.4 5450.00   4
   4  12 -20 73849.0 5329.21   4
  -4 -12  20 76103.8 4968.93   1
   4 -16  20 82190.0 5357.41   1
   4  12 -23 71432.4 5505.77   4
  -4 -12  23 71845.1 4993.72   1
   4 -16  23 74420.8 5323.47   1
 -13  16 -23 160361. 8547.43   4
  16 -13  23 158833. 7249.48   1
 -16  13 -23 156688. 7650.49   4
  13 -16  23 173635. 8079.52   1
  16 -13  20 53075.3 3782.01   1
 -16  13 -20 57143.2 4210.47   4
 -13  16 -20 61108.5 4849.92   4
   3 -16 -20 48591.5 3588.84   2
  -3 -13 -20 49674.4 3738.19   2
  13 -16  20 58146.1 4254.67   1
 -13  -3  20 60478.2 4432.34   3
  16 -13  17 60919.1 3806.77   1
 -16  13 -17 62593.8 4209.63   4
   3 -16 -17 55491.6 3962.22   2
  -3 -13 -17 56976.4 4042.02   2
  13 -16  17 54046.4 3901.46   1
 -13  -3  17 70711.9 4581.51   3
 -13  16 -17 62574.1 4657.01   4
 -16   3  17 65095.1 4153.06   3
   3 -16 -14 12842.0 2037.84   2
 -13  -3  14 10532.2 1840.21   3
  13 -16  14 11699.5 1733.47   1
  -3 -13 -14 9318.01 1818.84   2
 -16   3  14 14492.6 2016.63   3
  16 -13  14 10194.2 1563.34   1
 -16  13 -14 12889.3 1990.59   4
 -13  16 -14 12030.5 2138.54   4
  13 -16  11 7939.49 1463.71   1
  -3 -13 -11 7835.80 1475.60   3
   3 -16 -11 7636.28 1761.58   2
  16 -13  11 9448.00 1327.31   1
 -13  -3  11 7897.64 1691.78   3
  -3 -13 -11 6168.12 1505.55   2
 -16   3  11 7519.72 1444.37   3
 -13  16 -11 8275.62 1841.82   4
  -3 -13  -8 15848.1 2201.33   3
   3 -16  -8 19471.8 2536.90   2
 -13  -3   8 21350.8 2477.85   3
  -3 -13  -8 16052.4 2391.54   2
 -13  16  -8 18470.3 2308.95   4
  13 -16   8 20846.8 2009.68   1
  16 -13   8 17117.0 1610.48   1
  13 -16   5 42010.5 2972.68   2
  13 -16   5 42896.7 2735.54   1
   3 -16  -5 39536.4 3480.28   2
  -3 -13  -5 41956.9 3450.10   3
  16 -13   5 41029.6 2212.10   1
 -13  -3   5 46254.8 3493.05   3
 -16   3   5 46477.0 3256.78   3
 -16   3   2 27868.4 2598.85   3
  -3 -13  -2 23312.6 2750.78   3
   3 -16  -2 26039.7 2797.38   2
 -13  -3   2 24394.3 2557.57   3
  13 -16   2 27207.1 2059.53   1
  13 -16   2 28221.9 2492.96   2
  -3  16  -1 67450.6 3567.13   4
   3  13  -1 70163.6 3140.16   4
  13 -16  -1 62252.3 3748.14   2
   3 -16   1 63712.6 4253.33   2
  -3 -13   1 62074.4 4428.59   3
 -13  -3  -1 61778.4 4004.32   3
   3  13  -4 97735.6 4246.47   4
  13 -16  -4 92606.0 4715.12   2
   3 -16   4 98050.7 5156.92   2
  -3  16  -4 97060.0 4577.60   4
  -3 -13   4 99542.1 5679.94   3
 -13  -3  -4 94886.5 4956.39   3
  -3  16  -7 67159.9 4024.14   4
  13 -16  -7 70479.7 3995.16   2
   3  13  -7 66287.6 3720.74   4
   3 -16   7 70271.8 4198.71   2
  -3 -13   7 61256.9 4464.18   3
 -13  -3  -7 63485.1 4018.82   3
  -3  16 -10 118815. 5730.51   4
  13 -16 -10 105633. 5037.22   2
   3  13 -10 118525. 5555.95   4
   3 -16  10 109379. 5191.85   2
  -3 -13  10 110111. 6040.82   3
  -3 -13  10 113197. 5732.01   2
 -13  -3 -10 104370. 5209.45   3
   3 -16  13 67916.1 4597.98   1
  13 -16 -13 71705.1 4044.54   2
  -3  16 -13 75699.8 4846.34   4
   3  13 -13 65926.8 4458.79   4
   3 -16  13 69876.6 3911.45   2
  -3 -13  13 71047.7 4279.25   2
 -13  -3 -13 69855.6 4151.10   3
  -3 -13  16 118543. 6146.28   1
  -3  16 -16 124807. 6719.96   4
   3 -16  16 120043. 6308.02   1
   3  13 -16 114892. 6385.79   4
 -13  -3 -16 118851. 5490.76   3
  -3  16 -19 127614. 7320.02   4
   3  13 -19 137143. 7370.64   4
  -3 -13  19 148522. 7104.20   1
   3 -16  19 144423. 7184.72   1
   3  13 -22 83616.6 6015.72   4
  -3  16 -22 91403.7 6369.83   4
  -3 -13  22 97203.9 5840.42   1
   3 -16  22 92790.2 5919.47   1
 -16  14 -24 241.574 1325.84   4
  16 -14  24 108.845 1301.47   1
 -16  14 -21 10364.8 2128.65   4
 -14  16 -21 6571.45 2070.21   4
  16 -14  21 5099.65 1544.76   1
  14 -16  21 8540.63 1920.38   1
   2 -16 -18 2073.82 1108.18   2
 -14  -2  18 1267.86 1238.00   3
  -2 -14 -18-145.182 1068.74   2
 -16   2  18 776.891 1142.09   3
  16 -14  18 1406.50 1111.62   1
 -16  14 -18 4561.57 1613.63   4
 -14  16 -18 3448.33 1736.25   4
  14 -16  18 1570.30 1236.17   1
   2 -16 -15 16852.4 2381.05   2
  16 -14  15 11537.7 1684.34   1
 -14  -2  15 14071.7 2141.64   3
  -2 -14 -15 13325.4 2082.70   2
 -16   2  15 12106.1 1911.28   3
  14 -16  15 14339.6 2037.98   1
 -16  14 -15 14699.7 2167.67   4
 -14  16 -15 18279.0 2591.03   4
   2 -16 -12 6353.48 1675.28   2
 -14  -2  12 8282.04 1640.56   3
  -2 -14 -12 6867.12 1841.61   2
  14 -16  12 6673.14 1384.43   1
 -16   2  12 9210.07 1743.50   3
 -14  16 -12 10353.8 1857.22   4
  16 -14  12 8959.04 1425.13   1
  14 -16   9 5155.91 1195.36   1
   2 -16  -9 6063.92 1605.01   2
 -14  -2   9 1391.05 1157.46   3
  -2 -14  -9 3127.40 1599.25   2
 -16   2   9 3929.41 1286.56   3
  16 -14   9 5589.69 1132.56   1
  -2 -14  -6 3551.94 1316.08   3
   2 -16  -6 926.709 1256.05   2
 -14  -2   6 3518.31 1193.98   3
  -2 -14  -6 2738.66 1446.96   2
 -16   2   6 3472.72 1238.23   3
  16 -14   6 2530.70 734.507   1
  14 -16   6 2304.25 799.849   1
  -2 -14  -3-1167.32 1135.72   3
   2 -16  -3-853.883 1229.22   2
 -14  -2   3-1061.89 1192.96   3
  -2 -14  -3-2355.97 1621.82   2
 -16   2   3 917.417 952.552   3
  14 -16   3 836.743 678.351   1
  -2 -14   0-706.665 1367.88   3
   2 -16   0 717.296 1212.28   2
 -14  -2   0 747.336 1184.18   3
 -16   2   0 1254.40 1046.59   3
  -2 -14   0-418.106 1315.16   2
   2  14   0 910.916 637.694   4
  14 -16   0 1518.33 713.199   1
  -2 -14   3 30218.6 3138.40   3
   2 -16   3 26803.1 2799.03   2
 -14  -2  -3 21936.7 2451.99   3
  -2  16  -3 25564.9 2225.85   4
 -16   2  -3 26730.0 2600.60   3
   2  14  -3 26853.2 2132.14   4
  -2 -14   3 26954.4 2921.79   2
  -2 -14   6 20948.0 2748.48   3
   2 -16   6 21396.1 2469.01   2
  -2 -14   6 24025.8 2676.36   2
 -14  -2  -6 20032.8 2294.03   3
 -16   2  -6 21019.4 2311.74   3
   2  14  -6 25863.0 2273.15   4
  -2  16  -6 22892.8 2274.57   4
   2 -16   9 1861.87 1020.15   2
  -2 -14   9 2317.24 1239.30   2
 -14  -2  -9 2999.11 1203.32   3
  -2  16  -9 658.861 978.347   4
   2  14  -9 1000.74 913.269   4
   2 -16  12 5014.51 1286.48   2
  -2 -14  12 6090.92 1464.88   2
 -14  -2 -12 3980.62 1132.22   3
 -16   2 -12 6722.49 1479.77   3
  -2  16 -12 4629.20 1488.01   4
   2  14 -12 7383.64 1674.91   4
   2 -16  15 10798.3 1616.80   2
  -2 -14  15 9962.53 1667.19   2
 -14  -2 -15 10167.0 1711.89   3
 -16   2 -15 12543.5 1877.32   3
  -2 -14  15 10925.6 1969.83   1
   2 -16  15 8965.07 2057.53   1
  -2  16 -15 9181.23 1963.53   4
   2  14 -15 7389.55 1733.38   4
 -16   2 -18 2958.41 1132.30   3
  -2  16 -18 4320.76 1869.11   4
   2  14 -18 977.755 1577.28   4
  -2 -14  18 1461.15 1276.69   1
   2 -16  18 2546.57 1419.05   1
  -2  16 -21-1121.91 1561.51   4
   2  14 -21-2.64558 1491.07   4
  -2 -14  21 1805.53 1545.50   1
   2 -16  21 3029.07 1785.73   1
  15 -16  22-1084.04 1436.23   1
  16 -15  22 150.442 1195.30   1
 -16  15 -22 3862.22 2007.68   4
 -15  16 -22 2169.53 1625.99   4
   1 -16 -19 1428.33 936.003   2
  -1 -15 -19 4103.16 1433.27   2
 -15  -1  19 3348.04 1577.57   3
 -16   1  19 3689.73 1375.33   3
  16 -15  19 3067.44 1363.08   1
 -16  15 -19 1553.88 1320.37   4
 -15  16 -19 3831.50 1733.58   4
  15 -16  19 1847.73 1219.17   1
   1 -16 -16 18028.4 2453.97   2
  -1 -15 -16 14652.9 2218.17   2
 -15  -1  16 16779.2 2420.34   3
 -16   1  16 21832.0 2551.62   3
 -16  15 -16 15863.1 2375.31   4
 -15  16 -16 19045.3 2664.12   4
  15 -16  16 19766.4 2316.68   1
  16 -15  16 13040.9 1924.08   1
   1 -16 -13 27897.3 2922.11   2
  -1 -15 -13 25174.1 2919.30   2
 -15  -1  13 24430.4 2722.97   3
 -16   1  13 21978.9 2472.78   3
  15 -16  13 24328.1 2410.57   1
 -15  16 -13 22311.1 2669.67   4
  16 -15  13 27771.7 2464.90   1
   1 -16 -10 72855.7 4931.29   2
  15 -16  10 72657.4 3845.55   1
  -1 -15 -10 75508.9 4978.53   2
  16 -15  10 74062.0 3780.70   1
 -15  -1  10 69896.0 4433.51   3
 -16   1  10 74763.5 4464.75   3
  15 -16   7 130846. 5080.50   1
   1 -16  -7 136379. 6820.06   2
  -1 -15  -7 125171. 6674.10   2
  16 -15   7 129971. 4905.68   1
 -15  -1   7 123083. 5952.72   3
 -16   1   7 124359. 5817.37   3
  15 -16   4 116781. 4470.43   1
   1 -16  -4 107284. 6053.63   2
  -1 -15  -4 113909. 6296.34   2
 -15  -1   4 111715. 5569.09   3
 -16   1   4 111274. 5479.94   3
  15 -16   1 129311. 4582.44   1
   1 -16  -1 120836. 6400.00   2
  -1 -15  -1 125491. 6694.92   2
 -15  -1   1 126614. 5988.84   3
 -16   1   1 133441. 5938.43   3
  -1  16  -2 119022. 4927.38   4
   1  15  -2 116087. 4686.05   4
   1 -16   2 118362. 6182.61   2
  -1 -15   2 119504. 6345.74   2
 -15  -1  -2 116332. 5626.11   3
 -16   1  -2 111332. 5427.14   3
  -1  16  -5 112180. 5066.83   4
   1  15  -5 103830. 4840.89   4
   1 -16   5 112102. 5861.44   2
  -1 -15   5 118253. 6121.18   2
 -15  -1  -5 109023. 5452.74   3
 -16   1  -5 112522. 5402.58   3
  -1  16  -8 70275.1 4175.63   4
   1  15  -8 79803.3 4370.04   4
   1 -16   8 69701.3 4390.70   2
  -1 -15   8 72659.3 4619.73   2
 -15  -1  -8 70285.7 4251.14   3
 -16   1  -8 68401.4 4167.83   3
  -1  16 -11 44533.7 3581.46   4
   1  15 -11 44709.5 3544.04   4
   1 -16  11 44544.6 3281.94   2
  -1 -15  11 43209.5 3405.05   2
 -15  -1 -11 52559.6 3688.54   3
 -16   1 -11 48652.9 3429.57   3
   1 -16  14 12731.9 1840.53   2
  -1 -15  14 11762.6 1796.33   2
 -15  -1 -14 13312.2 1910.34   3
 -16   1 -14 14702.8 1975.41   3
   1 -16  14 10550.4 2198.20   1
  -1  16 -14 12309.3 2103.49   4
   1  15 -14 14130.7 2326.44   4
 -16   1 -17 10719.1 1757.77   3
  -1  16 -17 8417.70 2122.87   4
  -1 -15  17 8181.48 1933.54   1
   1  15 -17 8340.12 2092.25   4
   1 -16  17 8258.33 2057.13   1
  -1  16 -20 890.365 1441.99   4
   1  15 -20 1520.95 1376.18   4
  -1 -15  20 1496.98 1587.31   1
   1 -16  20 852.518 1581.59   1
  16 -16  23 76309.9 5110.96   1
 -16  16 -20 113492. 6659.80   4
  16 -16  20 122204. 6218.24   1
   0 -16 -17 76092.1 4968.35   2
 -16   0  17 79588.9 4970.61   3
  16 -16  17 79371.1 4756.77   1
 -16  16 -14 93616.7 5383.95   4
   0 -16 -14 77267.8 5064.11   2
  16 -16  14 88152.7 4680.03   1
 -16   0  14 89526.2 5171.52   3
   0 -16 -11 50604.6 4139.03   2
  16 -16  11 56166.3 3439.83   1
 -16   0  11 52000.7 3878.29   3
   0 -16  -8 178318. 8133.50   2
  16 -16   8 176114. 6197.24   1
 -16   0   8 167863. 7176.46   3
  16 -16   5 155091. 5413.93   1
   0 -16  -5 157387. 7572.97   2
 -16   0   5 155464. 6812.56   3
   0 -16  -2 121040. 6587.07   2
 -16   0   2 127701. 6002.06   3
   0 -16   1 15177.0 2439.75   2
 -16   0  -1 12718.4 2047.84   3
   0  16  -1 14837.9 1692.62   4
   0  16  -4 40335.0 2820.45   4
   0 -16   4 38292.5 3520.28   2
 -16   0  -4 34810.5 3054.46   3
   0 -16   7 1093.24 1221.44   2
 -16   0  -7 2658.94 1259.75   3
   0  16  -7 447.042 890.552   4
   0 -16  10 2974.39 1312.86   2
 -16   0 -10 870.778 993.388   3
   0  16 -10 2351.54 1266.45   4
   0 -16  13 12648.8 1935.13   2
 -16   0 -13 14704.8 2115.16   3
   0  16 -13 18427.8 2482.01   4
 -16   0 -16 24443.5 2564.32   3
   0 -16  16 23308.8 2905.25   1
   0  16 -16 21487.0 2902.11   4
   0  16 -19 81442.2 5777.99   4
   0 -16  19 92611.5 5821.38   1
   9 -17  23 24006.6 3156.75   1
   9   8 -23 29072.8 3511.28   4
  -9  -8  20 20878.5 2833.10   3
   9 -17  20 21416.0 2772.95   1
  -9  17 -20 16071.0 2904.18   4
   9   8 -20 24824.3 3148.75   4
   8 -17 -20 21287.3 2274.46   2
  -9  -8  20 19186.9 2460.49   1
  -9  17 -17 44052.2 4056.85   4
  -9  -8  17 45421.2 3411.50   1
   8 -17 -17 42014.5 3206.97   2
   9   8 -17 46453.9 3914.19   4
   9 -17  17 48537.3 3889.01   1
  -9  -8  17 44025.5 3853.77   3
 -17   8  17 43466.2 3121.89   3
 -17   8  14 33893.5 2687.64   3
  -9  -8  14 39038.2 3107.97   1
  -9  17 -14 39250.4 3642.66   4
   9 -17  14 35682.1 2671.23   2
   9 -17  14 38537.4 3289.69   1
   9   8 -14 36932.8 3306.50   4
   8 -17 -14 44706.7 3343.04   2
  -9  -8  14 36208.8 3422.12   3
  -8  -9 -14 37062.2 2946.76   3
  -9  -8  11 34756.4 3230.97   3
  -9  17 -11 34596.9 3199.24   4
   9 -17  11 35822.6 3005.40   1
   9 -17  11 30563.4 2501.45   2
   9   8 -11 30470.7 2839.88   4
   8 -17 -11 30877.6 2885.45   2
  -8  -9 -11 34161.8 2889.75   3
  -9  -8   8 23304.2 2703.58   3
  -8  -9  -8 17094.3 2240.24   3
   9 -17   8 24957.1 2414.77   2
   9 -17   8 19339.2 2206.03   1
  -9  17  -8 18140.7 2271.87   4
   9   8  -8 20274.1 2130.10   4
   8 -17  -8 21193.3 2463.89   2
  -8  -9  -5 7422.45 1567.04   3
  -9  -8   5 5576.12 1530.55   3
  -9  17  -5 6218.98 1464.70   4
   9   8  -5 7434.94 1219.87   4
   9 -17   5 5772.50 1294.38   2
   8 -17  -5 3793.37 1245.63   2
  -8  -9  -2 6667.87 1484.39   3
  -9  -8   2 9676.46 1773.50   3
   9 -17   2 10834.5 1744.25   2
   8 -17  -2 9889.61 1736.68   2
  -8  -9   1 13695.9 2107.87   3
  -9  -8  -1 13725.7 2070.47   3
   9 -17  -1 12100.8 1844.67   2
   8 -17   1 11815.0 1908.61   2
  -8  -9   4-20.3029 1024.55   3
  -9  -8  -4 2611.92 1217.87   3
  -8  17  -4 107.819 1037.12   4
   8   9  -4 1893.48 682.800   4
   9 -17  -4 2029.56 1268.23   2
   8 -17   4 1501.23 1074.87   2
  -8  -9   7 23450.1 2664.28   3
  -9  -8  -7 26515.3 2667.42   3
   8   9  -7 25400.7 2244.95   4
  -8  17  -7 23618.7 2482.11   4
   9 -17  -7 21390.6 2438.82   2
   8 -17   7 24187.2 2366.93   2
   8 -17  10 33897.6 2980.48   1
   8   9 -10 30441.5 2729.16   4
   8 -17  10 30307.3 2574.74   2
   9 -17 -10 32396.6 2862.58   2
  -8  17 -10 29585.7 2929.59   4
  -8  -9  10 33370.1 3219.99   3
  -9  -8 -10 26836.6 2644.79   3
  -8  17 -13 91490.1 5487.22   4
   8 -17  13 83522.8 4968.68   1
   8 -17  13 100325. 4589.76   2
   8   9 -13 88265.1 5140.57   4
   9 -17 -13 97458.7 5012.35   2
  -8  -9  13 96045.7 5500.87   3
  -9  -8 -13 88814.0 4725.51   3
  -8  17 -16 82499.0 5644.02   4
  -8  -9  16 90116.6 4929.87   1
   9 -17 -16 79164.0 4482.00   2
   8   9 -16 77925.1 5062.83   4
   8 -17  16 82852.4 5049.27   1
  -8  -9  16 82331.5 5244.13   3
 -17   9  16 82697.6 4268.07   3
  -8  17 -19 63034.9 5110.27   4
   9 -17 -19 48577.9 3444.34   2
   8   9 -19 54111.2 4545.49   4
  -8  -9  19 61327.5 4184.97   1
   8 -17  19 56248.7 4333.28   1
  -8  -9  19 55961.4 4399.72   3
  -8  -9  22 25325.3 3122.26   3
   8 -17  22 23642.0 3005.09   1
  -8  17 -22 22947.5 3298.93   4
   8   9 -22 25704.4 3235.73   4
  -8  -9  22 30526.3 3138.09   1
 -10  -7  21 114.714 1212.95   3
 -10  17 -21-330.241 1550.89   4
  17 -10  21 2598.98 1242.89   1
  10   7 -21-119.752 1320.50   4
  10 -17  21 3098.37 1771.00   1
  10 -17  18 3904.42 1705.77   1
 -10  -7  18 1441.16 1290.42   3
 -10  17 -18-1523.90 1510.38   4
  17 -10  18 2234.81 1069.83   1
  10   7 -18 1744.70 1445.78   4
 -10  -7  18 1616.03 1100.11   1
   7 -17 -18 2581.88 1162.83   2
  17 -10  15 7571.91 1364.46   1
 -10  -7  15 7873.01 1848.10   3
 -10  17 -15 10073.1 2096.27   4
 -10  -7  15 9075.76 1662.34   1
  10   7 -15 9226.47 1977.10   4
  10 -17  15 6746.71 1287.10   2
 -17   7  15 9712.82 1673.09   3
  10 -17  15 8286.77 1740.13   1
   7 -17 -15 9103.58 1734.77   2
  -7 -10 -12 9063.08 1716.51   3
  17 -10  12 8761.05 1320.89   1
 -10  -7  12 9136.38 1907.57   3
 -17   7  12 7837.81 1421.30   3
 -10  17 -12 7689.68 1840.00   4
  10   7 -12 8328.08 1622.41   4
  10 -17  12 11721.9 1896.09   1
  10 -17  12 8245.29 1366.46   2
   7 -17 -12 10112.5 1702.13   2
  -7 -10  -9 5165.88 1358.51   3
 -10  -7   9 5192.54 1519.43   3
 -10  17  -9 5100.77 1535.95   4
  10 -17   9 7448.57 1515.03   1
  10   7  -9 5199.48 1370.99   4
  10 -17   9 6410.98 1331.40   2
  17 -10   9 7202.92 1002.05   1
   7 -17  -9 5583.90 1467.91   2
  -7 -10  -6 1400.16 1172.54   3
 -10  -7   6 2801.61 1401.40   3
 -10  17  -6 3069.52 1301.53   4
  10   7  -6 1948.07 850.088   4
  10 -17   6 2245.71 1114.52   2
   7 -17  -6 1714.16 1025.21   2
  -7 -10  -3-273.970 1013.24   3
 -10  -7   3 592.118 1014.75   3
  10 -17   3 1229.45 845.868   2
   7 -17  -3 326.716 1021.05   2
  -7 -10   0-999.779 1343.46   3
 -10  -7   0-334.416 1015.06   3
  10 -17   0 1028.62 1140.39   2
   7 -17   0-45.3245 1130.68   2
  -7 -10   3 11271.7 2021.71   3
 -10  -7  -3 7647.67 1579.80   3
  -7  17  -3 10789.8 1688.09   4
  10 -17  -3 8816.32 1693.15   2
   7 -17   3 10650.7 1772.45   2
  -7 -10   6-1025.89 1447.47   3
 -10  -7  -6 3.34375 1067.89   3
  -7  17  -6 960.822 1053.42   4
   7  10  -6-84.0604 701.129   4
  10 -17  -6 723.802 1063.09   2
   7 -17   6-1483.54 1104.28   2
  -7 -10   9 19721.5 2587.76   3
 -10  -7  -9 20419.5 2375.08   3
  -7  17  -9 22166.4 2520.82   4
   7  10  -9 23040.6 2345.51   4
  10 -17  -9 19016.7 2337.36   2
   7 -17   9 22394.7 2242.10   2
  -7 -10  12 13810.7 2325.82   3
 -10  -7 -12 12847.9 1863.51   3
  -7  17 -12 10878.3 2076.15   4
   7 -17  12 11772.6 1984.94   1
   7  10 -12 12540.0 1976.31   4
  10 -17 -12 13800.0 1991.02   2
   7 -17  12 11619.8 1663.78   2
  -7 -10  15 3032.22 1242.72   3
  -7 -10  15 3185.47 1375.25   1
  -7  17 -15 1129.14 1491.83   4
   7  10 -15-837.605 1371.57   4
   7 -17  15 3831.08 1667.82   1
  10 -17 -15 6094.36 1540.10   2
   7 -17  15 3626.32 1184.43   2
  -7 -10  18 1197.34 1184.03   3
  -7  17 -18 1889.84 1723.11   4
   7  10 -18 935.191 1182.92   4
  -7 -10  18 816.866 1178.28   1
  10 -17 -18 502.212 895.007   2
   7 -17  18 1107.47 1463.04   1
  -7 -10  21 10962.5 2127.97   3
   7 -17  21 12850.6 2492.93   1
  -7  17 -21 13095.6 2599.75   4
   7  10 -21 8589.41 2266.76   4
  -7 -10  21 10753.1 1956.56   1
  -7 -10  24 1010.22 1409.39   1
 -11  -6  22 2533.37 1311.20   3
  11 -17  22-701.319 1415.51   1
 -11  17 -22 963.756 1515.19   4
  11   6 -22 1146.05 1354.51   4
  17 -11  22 291.980 1216.56   1
 -11  -6  19 250.115 1279.22   3
  11 -17  19 2988.52 1357.12   1
  -6 -11 -19 2476.65 1034.49   2
  17 -11  19 6134.34 1561.24   1
 -17  11 -19 3165.96 1232.29   4
 -11  17 -19 3011.53 1722.51   4
  11   6 -19 4025.14 1688.93   4
   6 -17 -19 4121.44 1376.82   2
  11 -17  16 9868.24 1908.02   1
 -11  -6  16 8443.82 1804.90   3
 -17   6  16 11063.8 1738.68   3
 -11  17 -16 12500.8 2340.01   4
  11   6 -16 15078.2 2320.71   4
   6 -17 -16 11245.0 1893.12   2
  17 -11  16 9766.52 1539.16   1
  17 -11  13 73815.0 3657.42   1
 -11  -6  13 79621.2 4191.18   1
 -11  17 -13 68253.1 4697.75   4
  11 -17  13 73947.4 3954.50   2
  11   6 -13 76734.4 4669.91   4
  11 -17  13 71144.3 4374.65   1
   6 -17 -13 74552.3 4597.59   2
  -6 -11 -13 70304.1 4172.65   3
 -11  -6  13 74055.8 4715.69   3
 -17   6  13 72480.5 4088.19   3
 -17   6  10 68698.4 3954.62   3
  17 -11  10 69610.4 3240.62   1
 -11  17 -10 68930.8 4455.32   4
  11 -17  10 62774.9 3729.99   2
  11 -17  10 70912.3 4110.87   1
  11   6 -10 63416.6 3978.81   4
   6 -17 -10 66623.6 4344.34   2
  -6 -11 -10 76723.2 4488.84   3
 -11  -6  10 67518.5 4437.36   3
 -11  17  -7 61821.5 4061.94   4
  11 -17   7 69421.6 3954.14   1
  11 -17   7 72301.2 3972.55   2
  11   6  -7 65597.9 3769.19   4
   6 -17  -7 64639.0 4298.60   2
  -6 -11  -7 62564.9 4251.35   3
 -11  -6   7 70524.1 4409.53   3
  11 -17   4 53000.9 3547.90   2
  11   6  -4 48741.2 2900.10   4
   6 -17  -4 55396.5 3965.36   2
  -6 -11  -4 47065.9 3691.17   3
 -11  -6   4 52846.7 3778.25   3
  11 -17   1 43538.6 3213.26   2
   6 -17  -1 44030.8 3478.75   2
  -6 -11  -1 41079.1 3489.64   3
 -11  -6   1 45660.4 3585.38   3
  -6  17  -2 42089.4 3045.60   4
  11 -17  -2 40580.5 3176.92   2
   6 -17   2 44456.8 3413.38   2
  -6 -11   2 41326.4 3551.36   3
 -11  -6  -2 44454.7 3486.47   3
  -6  17  -5 120327. 5551.97   4
   6  11  -5 121504. 4909.05   4
  11 -17  -5 121148. 5686.28   2
   6 -17   5 116996. 5566.24   2
  -6 -11   5 120042. 6305.69   3
 -11  -6  -5 129134. 6010.95   3
  -6  17  -8 65007.4 4141.06   4
   6  11  -8 66244.7 3839.38   4
  11 -17  -8 60720.1 3917.98   2
   6 -17   8 59285.7 3755.33   2
  -6 -11   8 68975.4 4680.80   3
 -11  -6  -8 66966.6 4167.43   3
  -6 -11  11 8266.45 1848.11   3
 -11  -6 -11 13448.5 1969.85   3
   6 -17  11 8018.54 1794.13   1
  -6  17 -11 11185.0 1959.02   4
   6  11 -11 9255.23 1720.19   4
  11 -17 -11 5294.77 1423.28   2
   6 -17  11 9401.50 1423.65   2
  -6 -11  14-1986.80 1411.83   3
 -11  -6 -14 13.7391 869.782   3
  -6  17 -14-1311.03 1385.01   4
   6 -17  14 2165.77 1461.53   1
   6  11 -14 459.467 1215.28   4
  11 -17 -14 366.590 1010.94   2
   6 -17  14 1834.70 1014.82   2
  -6 -11  17 1122.37 1200.33   3
  -6  17 -17 2240.56 1720.69   4
  -6 -11  17-849.078 1270.35   1
   6  11 -17 2227.59 1319.84   4
   6 -17  17 1083.66 1379.04   1
  11 -17 -17 442.084 872.123   2
  -6  17 -20 3062.61 1674.41   4
   6  11 -20-657.079 1579.80   4
  11 -17 -20 634.892 864.171   2
  -6 -11  20 2936.63 1560.06   1
   6 -17  20 3518.20 1880.94   1
   6  11 -23 2221.59 1515.42   4
  -6 -11  23 4610.40 1732.36   1
  17 -12  23 18102.4 2544.17   1
  12 -17  23 22632.8 2922.37   1
  12   5 -23 24156.9 3239.50   4
 -12  -5  20 12543.7 2251.88   3
  -5 -12 -20 8650.24 1776.32   2
  12 -17  20 10106.8 2107.54   1
 -17  12 -20 12753.2 2077.03   4
 -12  17 -20 7886.24 2158.04   4
  12   5 -20 6870.56 1886.65   4
  17 -12  20 12737.3 2033.21   1
   5 -17 -20 11697.2 1865.55   2
  17 -12  17 47102.8 3323.04   1
 -12  17 -17 53090.1 4509.81   4
  12   5 -17 52585.7 4158.77   4
   5 -17 -17 54160.3 3786.77   2
  12 -17  17 50392.6 3895.10   1
  -5 -12 -17 43725.9 3624.20   2
 -12  -5  17 45716.9 3854.00   3
 -17   5  17 53785.7 3745.71   3
 -12  17 -14 44472.3 3922.65   4
  17 -12  14 41306.0 2815.92   1
   5 -17 -14 40819.7 3403.99   2
  12 -17  14 41206.9 3277.90   1
  -5 -12 -14 49654.3 3979.08   2
 -12  -5  14 44503.8 3711.32   3
 -17   5  14 46854.4 3362.76   3
  17 -12  11 97365.6 4140.36   1
 -12  17 -11 91041.3 5270.40   4
  12 -17  11 93049.7 4625.01   2
  12 -17  11 101163. 4962.64   1
   5 -17 -11 100032. 5370.77   2
  -5 -12 -11 101100. 5243.34   3
 -12  -5  11 93225.3 5248.06   3
 -17   5  11 95226.4 4808.34   3
 -17   5   8 120351. 5400.48   3
 -12  17  -8 118183. 5796.30   4
  12 -17   8 110664. 5154.31   2
  12 -17   8 117609. 5240.00   1
   5 -17  -8 110952. 5871.83   2
  -5 -12  -8 117305. 5936.89   3
 -12  -5   8 117495. 5840.07   3
  12 -17   5 119776. 5074.49   1
  12 -17   5 122714. 5438.10   2
   5 -17  -5 116652. 5993.42   2
  -5 -12  -5 113344. 5961.97   3
 -12  -5   5 109078. 5669.36   3
   5 -17  -2 4013.89 1311.24   2
  -5 -12  -2 3076.23 1406.89   3
 -12  -5   2 6450.91 1712.04   3
  12 -17   2 3541.51 1278.41   2
   5 -17   1 5458.36 1431.28   2
  -5 -12   1 7257.94 1719.40   3
 -12  -5  -1 7041.92 1590.90   3
  12 -17  -1 4456.89 1365.06   2
  -5 -12   4 32253.0 3230.00   3
  -5  17  -4 33319.3 2759.16   4
   5  12  -4 33860.0 2350.19   4
  12 -17  -4 36918.0 3004.41   2
   5 -17   4 30094.0 2852.37   2
 -12  -5  -4 33520.1 3031.10   3
   5 -17   7 22216.3 2374.38   2
  -5 -12   7 24117.9 2976.77   3
 -12  -5  -7 20566.7 2379.99   3
  -5  17  -7 23039.2 2463.71   4
   5  12  -7 19467.3 2069.26   4
  12 -17  -7 22973.7 2481.19   2
  -5 -12  10 20.9540 1303.79   3
 -12  -5 -10 3505.70 1364.42   3
  -5  17 -10-50.0189 1147.94   4
   5  12 -10 1958.77 1012.32   4
  12 -17 -10 695.624 1117.38   2
   5 -17  10 1011.99 1043.26   2
  -5 -12  13 3192.87 1566.15   3
 -12  -5 -13 3599.21 1328.14   3
   5 -17  13 449.544 1143.87   1
  -5  17 -13 703.207 1260.56   4
   5  12 -13 416.340 1090.51   4
  12 -17 -13 1636.08 1179.33   2
   5 -17  13-496.184 878.856   2
  -5 -12  16 15827.5 2458.87   3
  -5 -12  16 20131.4 2569.77   1
  -5  17 -16 15947.1 2639.58   4
   5  12 -16 14442.9 2332.74   4
   5 -17  16 19295.4 2685.56   1
  12 -17 -16 14498.1 2020.66   2
  12 -17 -19 23677.5 2351.97   2
  -5  17 -19 25021.8 3376.02   4
   5  12 -19 23655.2 3045.41   4
  -5 -12  19 25271.6 2882.96   1
   5 -17  19 21901.4 2846.79   1
   5 -17  22 35686.4 3799.27   1
  -5 -12  22 41316.2 3802.61   1
  -5  17 -22 35406.3 4075.02   4
   5  12 -22 37011.1 3955.45   4
 -17  13 -24 2267.94 1532.16   4
  17 -13  24 577.504 1267.95   1
 -13  -4  21 3382.04 1528.47   3
  17 -13  21 1392.32 1024.58   1
 -17  13 -21 1504.29 1453.28   4
 -13  17 -21 1217.75 1282.34   4
  13 -17  21 680.291 1292.11   1
  13   4 -21 1163.66 1394.46   4
  17 -13  18 1363.99 923.852   1
 -13  -4  18 232.102 1306.91   3
  -4 -13 -18-188.148 1016.44   2
 -17   4  18 2060.11 1168.44   3
  13 -17  18-30.6412 1051.94   1
 -17  13 -18 2278.57 1333.73   4
 -13  17 -18-14.6624 1379.61   4
   4 -17 -18 244.338 1052.54   2
   4 -17 -15 353.821 1053.31   2
 -13  -4  15 969.415 1342.64   3
  13 -17  15-936.247 1158.08   1
  -4 -13 -15 269.344 1137.77   2
 -17   4  15 990.311 1194.33   3
 -13  17 -15-238.562 1334.86   4
  17 -13  15 2477.09 1022.70   1
  -4 -13 -12 8435.50 1582.62   3
   4 -17 -12 6996.59 1653.37   2
 -13  -4  12 7400.50 1731.12   3
 -17   4  12 8648.46 1571.70   3
  -4 -13 -12 5535.49 1618.17   2
 -13  17 -12 6993.01 1745.56   4
  17 -13  12 6699.66 1229.01   1
  13 -17  12 9553.56 1648.28   1
  -4 -13  -9 4530.01 1377.38   3
   4 -17  -9 1425.52 1216.54   2
 -17   4   9 6573.86 1510.28   3
 -13  -4   9 3350.70 1419.49   3
  17 -13   9 3518.68 888.141   1
 -13  17  -9 3131.95 1367.76   4
  13 -17   9 6172.41 1405.62   1
  -4 -13  -6 4548.70 1421.62   3
   4 -17  -6 5727.64 1671.78   2
 -13  -4   6 4688.54 1467.66   3
 -17   4   6 4267.27 1403.06   3
  13 -17   6 4580.91 1050.29   1
  13 -17   6 2808.74 1228.41   2
  -4 -13  -3-1326.18 1284.45   3
   4 -17  -3 1702.85 1308.00   2
 -13  -4   3 1764.27 1285.12   3
 -17   4   3 1919.06 1242.53   3
  13 -17   3 1258.57 861.597   1
  13 -17   3 2309.78 1150.46   2
  -4 -13   0 1404.06 1272.01   3
   4 -17   0 2787.85 1578.31   2
 -13  -4   0-56.7934 1192.24   3
  13 -17   0-15.0026 1053.29   2
  -4 -13   3 14537.4 2313.41   3
   4 -17   3 15203.2 2197.04   2
 -13  -4  -3 13370.1 2051.41   3
  -4  17  -3 11129.2 1695.03   4
   4  13  -3 14221.3 1459.68   4
  13 -17  -3 11186.6 1803.43   2
  -4 -13   6 1185.58 1482.13   3
   4 -17   6 305.267 1090.94   2
 -13  -4  -6 1236.38 1024.04   3
  -4  17  -6-207.452 938.167   4
   4  13  -6 638.482 747.158   4
  13 -17  -6 1227.81 1071.73   2
  -4 -13   9 11714.2 2403.20   3
   4 -17   9 13822.2 1955.42   2
 -13  -4  -9 11432.0 1832.06   3
  -4  17  -9 13156.7 2008.91   4
   4  13  -9 12009.9 1815.64   4
  13 -17  -9 13309.6 1959.48   2
   4 -17  12 941.733 967.663   2
  -4 -13  12 792.655 1163.54   3
 -13  -4 -12 1796.17 1187.04   3
  -4 -13  12 177.874 1050.34   2
  -4  17 -12-353.757 1235.94   4
   4  13 -12 773.423 1108.93   4
  13 -17 -12 996.922 1062.21   2
 -13  -4 -15 844.887 944.116   3
  -4 -13  15 383.880 1071.38   2
  -4 -13  15 282.570 1177.07   1
  -4  17 -15 4692.72 1764.16   4
   4 -17  15-470.687 1290.61   1
   4  13 -15-14.5355 1269.85   4
  13 -17 -15 927.412 941.632   2
   4 -17  15 1616.48 1005.44   2
  -4  17 -18 4029.81 1997.05   4
   4  13 -18 4526.16 1611.79   4
  -4 -13  18 5222.25 1664.31   1
   4 -17  18 3048.75 1516.95   1
  -4  17 -21 1276.77 1596.66   4
   4  13 -21 3092.97 1708.65   4
  -4 -13  21 5585.67 1877.40   1
   4 -17  21 5443.75 2026.35   1
  17 -14  22 16616.8 2361.56   1
 -17  14 -22 17469.4 2568.61   4
  14 -17  22 17556.9 2587.71   1
  17 -14  19 36867.1 3143.65   1
 -14  -3  19 32465.9 3331.75   3
 -17  14 -19 35378.8 3355.01   4
 -14  17 -19 32930.4 3707.22   4
   3 -17 -19 32186.7 3056.33   2
  -3 -14 -19 29778.3 3068.06   2
  14 -17  19 32908.9 3256.10   1
   3 -17 -16 15712.9 2223.03   2
 -14  -3  16 20546.1 2616.07   3
  -3 -14 -16 14245.2 2158.77   2
 -17   3  16 20709.0 2397.95   3
  14 -17  16 18350.3 2341.57   1
 -14  17 -16 21247.5 2823.19   4
  17 -14  16 20289.1 2243.03   1
  17 -14  13 1267.31 813.208   1
   3 -17 -13-102.862 1374.80   2
 -14  -3  13 2637.72 1198.64   3
  14 -17  13 1800.72 1087.96   1
  -3 -14 -13 915.208 1279.27   2
 -17   3  13 1177.63 1067.75   3
 -14  17 -13 1009.81 1112.72   4
  14 -17  10 8438.97 1501.37   1
  -3 -14 -10 7571.07 1649.28   3
   3 -17 -10 6462.64 1701.45   2
  17 -14  10 5429.78 1148.79   1
 -14  -3  10 7601.18 1755.69   3
  -3 -14 -10 7001.50 1860.05   2
 -17   3  10 7018.09 1477.54   3
 -14  17 -10 5643.23 1541.75   4
  -3 -14  -7 26689.8 2824.27   3
   3 -17  -7 28124.1 3176.15   2
 -14  -3   7 25799.9 2811.69   3
  -3 -14  -7 21235.1 2767.19   2
 -17   3   7 28531.8 2667.08   3
  14 -17   7 23574.1 2142.93   1
  14 -17   4 37772.9 2564.56   1
  -3 -14  -4 40166.7 3689.47   2
   3 -17  -4 40259.2 3561.23   2
  -3 -14  -4 40591.3 3604.85   3
 -14  -3   4 42574.0 3425.86   3
 -17   3   4 33905.2 2970.49   3
  -3 -14  -1 10673.1 2062.96   3
   3 -17  -1 12622.8 2145.27   2
 -14  -3   1 8411.89 1703.38   3
  -3 -14  -1 9273.06 2006.73   2
 -17   3   1 9304.65 1838.18   3
  14 -17   1 9536.88 1312.50   1
  14 -17   1 11683.7 1847.66   2
 -17   3  -2 29931.4 2785.60   3
  -3 -14   2 30649.3 3243.65   3
  -3  17  -2 31018.9 2563.24   4
  -3 -14   2 29277.7 3275.19   2
  14 -17  -2 33431.3 2917.15   2
   3 -17   2 31372.0 3106.57   2
 -14  -3  -2 34278.7 3011.19   3
  -3  17  -5 91919.2 4684.72   4
   3  14  -5 88961.8 4268.01   4
  14 -17  -5 86670.1 4721.46   2
   3 -17   5 93205.0 5141.40   2
  -3 -14   5 87237.1 5525.27   3
  -3 -14   5 94222.5 5630.78   2
 -14  -3  -5 92135.0 5048.60   3
  -3  17  -8 168608. 6962.69   4
  14 -17  -8 164209. 6775.13   2
   3  14  -8 160172. 6599.82   4
   3 -17   8 162926. 6904.02   2
  -3 -14   8 176368. 8009.33   3
  -3 -14   8 175436. 7627.51   2
 -14  -3  -8 159616. 6919.71   3
  14 -17 -11 61345.3 3934.89   2
  -3  17 -11 63113.1 4357.31   4
   3  14 -11 65027.6 4233.81   4
   3 -17  11 65863.8 4015.26   2
  -3 -14  11 69028.3 4508.75   2
 -14  -3 -11 72125.8 4388.23   3
  -3  17 -14 37578.4 3587.17   4
   3  14 -14 34953.7 3403.37   4
   3 -17  14 32220.6 3328.65   1
   3 -17  14 35230.6 2834.40   2
  -3 -14  14 34995.1 3079.20   2
 -14  -3 -14 35454.0 3033.15   3
 -17   3 -17 31856.4 2876.79   3
  -3  17 -17 27138.7 3270.70   4
  -3 -14  17 29179.6 3148.60   1
   3  14 -17 24429.4 3071.01   4
   3 -17  17 24069.5 3026.67   1
  -3  17 -20 8329.25 2244.47   4
   3  14 -20 10013.7 2140.56   4
   3 -17  20 10299.7 2407.88   1
  17 -15  23 4182.13 1592.61   1
   2 -17 -20 749.774 1089.70   2
  -2 -15 -20 1471.84 1095.75   2
 -15  -2  20 2384.20 1439.97   3
 -15  17 -20 3446.45 1797.06   4
  17 -15  20 2520.27 1322.55   1
  15 -17  20 3788.86 1549.48   1
 -17  15 -20 1378.61 1240.88   4
   2 -17 -17 27.4892 1369.23   2
  -2 -15 -17 1562.19 1219.00   2
 -15  -2  17 3521.27 1639.60   3
 -17   2  17 1987.59 1181.60   3
  17 -15  17 721.949 1159.03   1
 -17  15 -17 1977.12 1391.68   4
 -15  17 -17 79.2822 1341.13   4
  15 -17  17 920.963 1161.97   1
   2 -17 -14 9914.29 1946.19   2
  17 -15  14 9789.51 1583.40   1
 -15  -2  14 11979.1 2040.71   3
  -2 -15 -14 9104.18 1991.82   2
 -17   2  14 11409.9 1980.19   3
  15 -17  14 10502.4 1783.51   1
 -15  17 -14 12634.0 2305.25   4
   2 -17 -11 14231.7 2405.97   2
 -15  -2  11 18117.6 2457.26   3
  15 -17  11 14887.5 1911.47   1
  -2 -15 -11 14089.8 2484.40   2
 -17   2  11 15569.8 2137.72   3
 -15  17 -11 18054.8 2442.41   4
  17 -15  11 16314.3 1850.28   1
  15 -17   8 49427.3 3104.05   1
   2 -17  -8 46119.8 3913.96   2
  -2 -15  -8 49907.5 4236.25   2
 -15  -2   8 48465.6 3702.51   3
 -17   2   8 52109.3 3692.70   3
   2 -17  -5 16153.7 2427.08   2
 -15  -2   5 18925.7 2435.01   3
  -2 -15  -5 16661.9 2579.34   2
 -17   2   5 21004.7 2415.15   3
  15 -17   5 22248.7 1961.15   1
  15 -17   2 96539.2 4058.95   1
   2 -17  -2 92522.4 5630.94   2
  -2 -15  -2 95056.6 5667.41   3
  -2 -15  -2 94833.5 5877.43   2
 -15  -2   2 93448.1 5167.62   3
 -17   2   2 94749.2 4997.06   3
  -2  17  -1 48980.9 3119.27   4
   2 -17   1 56004.8 4180.66   2
  -2 -15   1 49807.7 4174.11   3
  -2 -15   1 59948.3 4558.61   2
 -15  -2  -1 52593.9 3902.93   3
 -17   2  -1 51956.1 3729.02   3
 -17   2  -4 59891.7 3977.75   3
  -2  17  -4 60007.2 3637.75   4
   2  15  -4 64853.3 3557.00   4
   2 -17   4 61791.7 4358.39   2
  -2 -15   4 68119.0 4712.04   2
 -15  -2  -4 59117.2 4068.94   3
   2 -17   7 24709.7 2700.86   2
  -2 -15   7 21595.1 2642.81   2
 -15  -2  -7 20803.8 2469.66   3
 -17   2  -7 25341.6 2569.52   3
   2  15  -7 26050.3 2422.34   4
  -2  17  -7 24996.9 2538.55   4
 -17   2 -10 97300.8 5093.12   3
  -2  17 -10 88575.8 5059.09   4
   2  15 -10 94572.9 5103.74   4
   2 -17  10 92415.8 5012.38   2
  -2 -15  10 95437.7 5360.98   2
 -15  -2 -10 100588. 5256.47   3
 -17   2 -13 42799.5 3344.25   3
  -2  17 -13 40201.9 3663.74   4
   2  15 -13 41571.8 3613.94   4
   2 -17  13 43104.0 3269.63   2
  -2 -15  13 41401.8 3370.30   2
 -15  -2 -13 40536.0 3324.66   3
  -2 -15  16 38900.4 3709.04   1
   2 -17  16 38863.5 3823.83   1
   2  15 -16 35478.7 3561.68   4
  -2  17 -16 34562.4 3610.61   4
 -15  -2 -16 39268.7 3235.15   3
 -17   2 -16 39925.0 3239.03   3
  -2  17 -19-1797.34 1819.00   4
   2  15 -19-507.416 1480.93   4
  -2 -15  19 2247.93 1464.34   1
   2 -17  19 3777.74 1772.06   1
  16 -17  21 3624.62 1637.88   1
  17 -16  21 4565.79 1545.87   1
 -17  16 -21 6291.76 2054.41   4
   1 -17 -18 14441.6 2188.79   2
  -1 -16 -18 15045.1 2138.91   2
 -16  -1  18 17267.9 2530.99   3
  17 -16  18 19323.0 2458.11   1
 -17   1  18 16189.2 2400.93   3
 -17  16 -18 19531.0 2793.50   4
 -16  17 -18 20318.8 2920.73   4
  16 -17  18 17650.9 2389.60   1
   1 -17 -15 4117.02 1475.65   2
  -1 -16 -15 3824.33 1551.71   2
 -16  -1  15 4218.75 1528.33   3
 -17   1  15 3305.27 1529.77   3
 -16  17 -15 5941.72 1792.14   4
  16 -17  15 2725.34 1110.81   1
  17 -16  15 3391.80 1303.70   1
   1 -17 -12 8877.66 1909.42   2
  -1 -16 -12 8508.60 1909.59   2
 -16  -1  12 14400.7 2236.97   3
 -17   1  12 7559.47 1774.78   3
  16 -17  12 9597.54 1608.77   1
  17 -16  12 9929.64 1674.50   1
   1 -17  -9 4362.38 1545.48   2
  -1 -16  -9 4011.76 1669.14   2
 -16  -1   9 5693.01 1562.72   3
 -17   1   9 5592.98 1546.68   3
  16 -17   9 5087.26 1199.75   1
  16 -17   6 1154.81 832.262   1
   1 -17  -6 1561.15 1137.89   2
  -1 -16  -6 857.956 1196.95   2
 -16  -1   6 4226.42 1533.69   3
 -17   1   6 1506.95 1141.51   3
   1 -17  -3 5926.10 1810.07   2
  -1 -16  -3 2087.27 1224.11   2
 -16  -1   3 3585.29 1340.20   3
 -17   1   3 2675.56 1230.16   3
  -1 -16   0-34.1002 1391.37   2
 -16  -1   0 388.116 1207.79   3
 -17   1   0 901.913 1270.26   3
   1 -17   3 83.2523 1235.75   2
  -1 -16   3 3230.57 1453.58   2
 -16  -1  -3 2142.35 1182.91   3
 -17   1  -3 1525.73 1343.96   3
  -1  17  -3 2531.78 1037.41   4
   1  16  -3 975.057 773.468   4
   1 -17   6 5291.98 1594.09   2
  -1 -16   6 4336.36 1569.93   2
 -16  -1  -6 3241.64 1290.02   3
 -17   1  -6 6026.03 1637.89   3
  -1  17  -6 1953.16 1002.39   4
   1  16  -6 5685.99 1296.01   4
   1 -17   9 17401.8 2307.29   2
  -1 -16   9 18886.5 2497.98   2
 -17   1  -9 16088.9 2198.35   3
  -1  17  -9 14629.2 2124.24   4
   1  16  -9 16234.0 2091.38   4
 -16  -1  -9 17993.1 2356.92   3
   1 -17  12 12948.6 1954.68   2
  -1 -16  12 11249.3 1888.38   2
 -16  -1 -12 7821.40 1780.77   3
 -17   1 -12 8067.24 1696.68   3
  -1  17 -12 11844.9 2105.45   4
   1  16 -12 11982.1 2122.65   4
 -16  -1 -15 800.741 983.780   3
 -17   1 -15 1672.71 1201.95   3
  -1 -16  15 2173.27 1380.32   1
   1 -17  15 1037.48 1394.39   1
  -1  17 -15 540.857 1164.34   4
   1  16 -15 2607.07 1357.48   4
  -1  17 -18 276.183 1389.63   4
   1  16 -18 1102.87 1438.08   4
  -1 -16  18 2906.49 1631.83   1
   1 -17  18 2043.98 1571.80   1
   1  16 -21 413.555 1580.84   4
 -17  17 -19 46847.5 4237.50   4
   0 -17 -19 41213.3 3653.60   2
 -17   0  19 46457.6 3976.62   3
  17 -17  19 35742.5 3318.44   1
 -17  17 -16 66034.1 4897.31   4
   0 -17 -16 60079.8 4553.75   2
 -17   0  16 71191.9 4802.25   3
  17 -17  16 63582.9 4214.06   1
   0 -17 -13 63126.7 4741.13   2
  17 -17  13 67237.9 4064.81   1
 -17   0  13 72986.1 4686.42   3
   0 -17 -10 14149.4 2381.39   2
 -17   0  10 16111.5 2306.35   3
   0 -17  -7 6677.32 1948.61   2
 -17   0   7 4451.81 1504.63   3
   0 -17  -4 19354.7 2881.71   2
 -17   0   4 21614.4 2644.02   3
   0 -17  -1 3622.93 1784.82   2
 -17   0   1 3071.39 1436.43   3
   0 -17   2 2432.59 1505.17   2
 -17   0  -2 3139.13 1489.13   3
 -17   0  -5 1317.21 1145.55   3
   0 -17   5 548.156 1196.66   2
   0  17  -5 295.813 836.783   4
   0 -17   8 12352.5 2189.36   2
 -17   0  -8 7898.09 1793.86   3
   0  17  -8 12742.8 1931.55   4
   0 -17  11 19041.4 2414.64   2
 -17   0 -11 17897.0 2323.70   3
   0  17 -11 21118.6 2562.43   4
   0  17 -14 43590.2 3835.54   4
   0 -17  14 41866.4 3394.33   2
 -17   0 -14 46416.2 3660.88   3
   0  17 -17 22951.1 3007.46   4
   0 -17  17 21151.2 2881.60   1
   0  17 -20 21623.7 3206.34   4
   9 -18   0 328584. 10812.6   2
  -9  -9   0 345121. 11513.9   3
   9 -18   3 180910. 7169.62   2
   9 -18  -3 172994. 7372.71   2
  -9  -9   3 166052. 7460.32   3
  -9  -9  -3 168828. 7432.05   3
  -9  18  -6 359999. 11250.2   4
   9 -18   6 359724. 10893.9   2
   9 -18  -6 331425. 11164.6   2
  -9  -9   6 364567. 11938.1   3
  -9  -9  -6 331451. 11333.5   3
  -9  18  -9 112716. 5861.24   4
   9 -18   9 131964. 6086.50   1
   9 -18   9 119445. 5469.37   2
   9   9  -9 118657. 5511.65   4
   9 -18  -9 126327. 6097.34   2
  -9  -9   9 123941. 6398.86   3
  -9  -9  -9 116590. 5861.45   3
  -9  18 -12 113005. 6076.77   4
   9 -18  12 125655. 6086.44   1
   9 -18  12 107531. 5125.86   2
   9   9 -12 115135. 5810.90   4
   9 -18 -12 114978. 5738.24   2
  -9  -9  12 114307. 6236.81   3
  -9  -9 -12 110727. 5564.77   3
  -9  -9  15 34135.0 3445.99   3
  -9  -9  15 39731.7 3276.75   1
   9 -18  15 33077.1 2668.91   2
   9 -18 -15 35492.7 3163.27   2
  -9  18 -15 35175.8 3642.31   4
   9   9 -15 29332.6 3054.25   4
   9 -18  15 34791.2 3288.06   1
 -18   9  15 35829.0 2852.87   3
  -9  -9  18 25128.7 3011.20   3
  -9  18 -18 20042.2 2984.37   4
   9   9 -18 23171.8 2957.50   4
  -9  -9  18 20723.2 2539.86   1
   9 -18 -18 19963.0 2366.42   2
   9 -18  18 24504.0 2952.20   1
  -9  -9  21-881.719 1381.64   3
   9 -18  21 312.425 1539.86   1
  -9  18 -21-2329.56 2096.27   4
   9   9 -21 1250.88 1490.60   4
 -10  -8  22 39223.0 3916.85   3
  10   8 -22 34235.4 3735.59   4
 -10  18 -19 77157.1 5691.78   4
   8 -18 -19 66916.3 4257.39   2
  10   8 -19 79720.5 5424.44   4
  10 -18  19 81783.9 5271.36   1
 -10  -8  19 77571.8 5309.58   3
 -10  18 -16 59329.6 4752.78   4
 -10  -8  16 62192.9 4043.94   1
  10   8 -16 57547.2 4367.47   4
   8 -18 -16 53334.8 3875.03   2
  10 -18  16 58178.7 4294.71   1
 -10  -8  16 59702.9 4530.97   3
 -18   8  16 55927.0 3677.56   3
 -18   8  13 75957.4 4194.71   3
 -10  18 -13 71395.2 4873.77   4
  10 -18  13 73478.9 4056.24   2
  10 -18  13 77534.7 4693.80   1
  10   8 -13 68303.5 4513.48   4
   8 -18 -13 77124.3 4680.09   2
 -10  -8  13 70499.2 4815.79   3
  -8 -10 -13 78578.9 4485.38   3
 -10  18 -10 96709.8 5472.81   4
  10 -18  10 104573. 5368.59   1
  10 -18  10 104622. 5026.28   2
  10   8 -10 98511.1 5077.91   4
   8 -18 -10 96396.0 5318.64   2
  -8 -10 -10 90359.5 5095.81   3
 -10  -8  10 95750.0 5534.06   3
 -10  18  -7 88824.0 5016.31   4
  10 -18   7 96403.8 4841.68   2
  10   8  -7 96302.4 4619.73   4
   8 -18  -7 86334.1 5034.31   2
  -8 -10  -7 98030.7 5378.56   3
 -10  -8   7 97394.8 5501.62   3
  10 -18   4 45308.9 3370.42   2
   8 -18  -4 41911.5 3444.48   2
  -8 -10  -4 41059.5 3510.73   3
 -10  -8   4 45116.5 3702.53   3
  -8 -10  -1 24009.1 2801.30   3
 -10  -8   1 23656.6 2795.46   3
  10 -18   1 23200.3 2515.94   2
   8 -18  -1 22574.6 2558.24   2
  -8 -10   2 856.449 1265.12   3
 -10  -8  -2 1084.68 1199.08   3
  10 -18  -2 605.846 1090.61   2
   8 -18   2-529.499 1056.46   2
  -8 -10   5-1107.97 1533.96   3
 -10  -8  -5-263.655 1064.64   3
  -8  18  -5-44.7800 1212.62   4
  10 -18  -5 121.584 1068.65   2
   8 -18   5 1354.41 1161.61   2
  -8 -10   8 572.310 1303.52   3
 -10  -8  -8-47.6932 1125.66   3
  -8  18  -8 1167.66 1048.45   4
   8  10  -8-347.899 726.023   4
  10 -18  -8 3367.19 1395.72   2
   8 -18   8 3137.76 1283.75   2
  -8 -10  11 19890.4 2622.94   3
 -10  -8 -11 21326.2 2415.25   3
  -8  18 -11 19116.6 2487.28   4
   8 -18  11 20334.0 2548.39   1
   8  10 -11 19290.5 2312.35   4
  10 -18 -11 15999.6 2252.11   2
   8 -18  11 17364.6 2077.50   2
  -8  18 -14 44606.9 3966.62   4
   8 -18  14 45648.2 3767.59   1
   8 -18  14 41374.8 3018.21   2
  10 -18 -14 43994.1 3433.50   2
   8  10 -14 37245.6 3434.84   4
  -8 -10  14 51916.2 4233.54   3
 -10  -8 -14 41606.0 3234.11   3
  -8  18 -17 72900.4 5321.46   4
  -8 -10  17 77579.0 4764.92   1
  10 -18 -17 68162.0 4257.64   2
   8  10 -17 64696.3 4776.83   4
   8 -18  17 73292.2 4991.13   1
  -8 -10  17 72799.3 5123.90   3
  -8  18 -20 60973.2 5271.78   4
  10 -18 -20 69241.1 4134.58   2
   8  10 -20 56382.5 4667.56   4
  -8 -10  20 73089.3 4809.16   1
   8 -18  20 66049.1 4908.83   1
  -8 -10  20 68296.0 5062.82   3
 -11  18 -20 56448.0 5245.05   4
  18 -11  20 60529.1 3929.75   1
   7 -18 -20 61706.2 4056.05   2
  11   7 -20 61079.6 4805.57   4
  11 -18  20 60123.0 4635.76   1
  -7 -11 -20 47173.6 3830.73   2
 -11  -7  20 71364.3 5064.68   3
 -11  -7  17 34893.7 3502.87   3
  18 -11  17 36971.5 2894.53   1
  11   7 -17 43835.2 3839.23   4
   7 -18 -17 38081.7 3232.46   2
 -11  18 -17 36298.8 3945.88   4
  11 -18  17 36856.9 3443.84   1
 -18   7  17 37102.7 3146.52   3
 -11  18 -14 63319.3 4661.68   4
 -11  -7  14 62923.5 3946.14   1
  11 -18  14 63545.5 3717.41   2
  18 -11  14 55599.5 3339.52   1
  11   7 -14 62684.9 4419.51   4
   7 -18 -14 61684.5 4229.28   2
  11 -18  14 66730.0 4396.51   1
 -11  -7  14 71372.4 4781.71   3
 -18   7  14 59403.7 3783.96   3
 -18   7  11 62506.4 3828.04   3
  11 -18  11 68096.0 3879.41   2
  11 -18  11 61917.2 3991.36   1
  11   7 -11 58285.6 3965.05   4
   7 -18 -11 63945.5 4336.28   2
  -7 -11 -11 60724.4 4058.43   3
 -11  -7  11 58986.8 4294.97   3
 -11  18 -11 60426.6 4297.17   4
 -11  18  -8 100985. 5505.11   4
  11 -18   8 105835. 5213.67   1
  11 -18   8 111978. 5201.36   2
  11   7  -8 108838. 5088.66   4
   7 -18  -8 97638.3 5454.25   2
  -7 -11  -8 102028. 5589.26   3
 -11  -7   8 96656.2 5507.78   3
  -7 -11  -5 27106.5 2953.53   3
  11 -18   5 35195.4 2885.99   2
 -11  -7   5 34901.8 3274.43   3
   7 -18  -5 34017.3 3109.39   2
  11 -18   2 52739.5 3662.52   2
   7 -18  -2 56839.5 4043.71   2
  -7 -11  -2 52449.5 4033.00   3
 -11  -7   2 48178.5 3776.33   3
  -7 -11   1 21505.7 2650.36   3
 -11  -7  -1 24214.9 2708.88   3
  11 -18  -1 23976.1 2552.63   2
   7 -18   1 22863.5 2538.61   2
  -7 -11   4 32265.2 3273.59   3
  -7  18  -4 28301.8 2621.75   4
  11 -18  -4 32062.8 2962.74   2
 -11  -7  -4 31455.2 3042.12   3
   7 -18   4 27283.8 2697.17   2
  -7 -11   7 15935.8 2541.29   3
 -11  -7  -7 14191.4 2093.51   3
  -7  18  -7 15212.7 2103.05   4
   7  11  -7 15270.2 1800.50   4
  11 -18  -7 14368.7 2197.71   2
   7 -18   7 15713.7 2046.48   2
  -7 -11  10 5719.21 1885.39   3
 -11  -7 -10 5685.42 1529.45   3
  -7  18 -10 3338.57 1488.58   4
   7  11 -10 6853.10 1539.84   4
  11 -18 -10 7842.68 1753.99   2
   7 -18  10 6256.79 1486.60   2
  -7 -11  13 16492.5 2527.56   3
 -11  -7 -13 15170.9 2086.71   3
  -7  18 -13 16020.2 2453.58   4
   7 -18  13 14807.2 2303.45   1
   7  11 -13 15960.3 2215.32   4
  11 -18 -13 15957.9 2218.86   2
   7 -18  13 15366.0 1887.47   2
  -7 -11  16 15178.8 2420.56   3
  -7 -11  16 14670.1 2221.01   1
  -7  18 -16 13878.6 2582.23   4
   7  11 -16 12336.4 2152.85   4
   7 -18  16 16126.6 2520.12   1
  11 -18 -16 18525.0 2247.74   2
  -7 -11  19 22234.0 3008.05   3
  -7  18 -19 29020.5 3610.23   4
   7  11 -19 21701.6 2910.10   4
  -7 -11  19 23823.9 2841.05   1
  11 -18 -19 20856.6 2363.39   2
   7 -18  19 22689.8 3014.07   1
   7  11 -22 23942.7 3155.44   4
  -7 -11  22 23999.7 2924.37   1
  18 -12  21 135416. 6429.25   1
  12   6 -21 141526. 7578.40   4
  12 -18  21 148180. 7434.50   1
 -12  -6  21 149597. 7613.17   3
 -12  18 -18 112330. 6717.15   4
  18 -12  18 107157. 5231.43   1
  12   6 -18 120701. 6536.71   4
   6 -18 -18 112941. 5780.44   2
  12 -18  18 105898. 5956.22   1
  -6 -12 -18 96125.3 5641.47   2
 -12  -6  18 119308. 6471.14   3
  18 -12  15 56962.1 3370.84   1
 -12  18 -15 50967.3 4297.34   4
  12   6 -15 58078.1 4293.96   4
   6 -18 -15 47242.2 3757.53   2
  12 -18  15 45936.2 3659.55   1
  -6 -12 -15 47372.6 4022.34   2
 -12  -6  15 52410.5 4146.55   3
 -18   6  15 50950.7 3656.39   3
  -6 -12 -12 10099.7 1760.27   3
 -12  -6  12 9629.45 1941.44   3
 -18   6  12 9527.15 1695.70   3
 -12  18 -12 8328.60 1994.06   4
  12   6 -12 10665.1 1880.86   4
  12 -18  12 8524.34 1499.22   2
  12 -18  12 10304.8 1825.03   1
   6 -18 -12 8857.17 1876.88   2
   6 -18  -9 23858.2 2802.53   2
  -6 -12  -9 20736.6 2486.03   3
 -12  -6   9 27431.5 2946.27   3
 -18   6   9 28075.6 2618.05   3
 -12  18  -9 26419.8 2886.55   4
  12 -18   9 24824.1 2425.97   1
  12   6  -9 24773.8 2443.69   4
  12 -18   9 24391.3 2360.79   2
   6 -18  -6-32.9133 1383.35   2
  -6 -12  -6 569.252 1129.44   3
 -12  -6   6 1240.09 1225.16   3
  12 -18   6 1939.29 1079.23   1
  12 -18   6 969.340 993.394   2
   6 -18  -3 22810.0 2652.00   2
  -6 -12  -3 23819.0 2878.41   3
 -12  -6   3 24770.5 2792.50   3
  12 -18   3 26370.2 2634.16   2
  12 -18   0 101925. 5251.43   2
   6 -18   0 100104. 5439.25   2
  -6 -12   0 98410.3 5771.96   3
 -12  -6   0 103709. 5571.38   3
  12 -18  -3 52709.5 3691.16   2
   6 -18   3 56419.1 3965.28   2
  -6 -12   3 58068.8 4425.73   3
  -6  18  -3 54062.1 3600.83   4
 -12  -6  -3 50591.4 3846.82   3
  -6  18  -6 182165. 7185.01   4
   6  12  -6 177618. 6427.46   4
  12 -18  -6 174371. 7182.99   2
   6 -18   6 169933. 7043.11   2
  -6 -12   6 172515. 7971.88   3
 -12  -6  -6 166466. 7293.81   3
  -6  18  -9 214990. 8352.10   4
  12 -18  -9 197089. 7855.00   2
   6  12  -9 207103. 7682.01   4
   6 -18   9 220313. 7912.27   2
  -6 -12   9 215715. 9008.95   3
 -12  -6  -9 201801. 8105.53   3
   6 -18  12 284401. 10324.8   1
  -6  18 -12 276155. 10291.3   4
  12 -18 -12 275735. 9457.81   2
   6  12 -12 268500. 9728.34   4
   6 -18  12 272899. 9037.20   2
  -6 -12  12 264816. 10464.4   3
 -12  -6 -12 271868. 9564.60   3
  -6 -12  15 186642. 7954.06   1
  -6  18 -15 198589. 8702.15   4
  12 -18 -15 183516. 7351.56   2
   6 -18  15 183152. 8217.09   1
   6  12 -15 174782. 7976.41   4
  -6 -12  15 190932. 8561.57   3
  -6  18 -18 217974. 9828.54   4
  12 -18 -18 211638. 7979.57   2
  -6 -12  18 223992. 8977.59   1
   6  12 -18 204358. 9162.66   4
   6 -18  18 229454. 9533.01   1
  -6 -12  18 222089. 9486.35   3
   6  12 -21 173735. 8762.95   4
  -6 -12  21 191899. 8431.25   1
  18 -13  22 1407.14 1172.98   1
 -18  13 -22 1581.80 1517.95   4
  13   5 -22 904.587 1525.03   4
 -13  -5  19 6498.12 1677.40   3
  -5 -13 -19 10412.1 1933.80   2
  13 -18  19 14437.4 2272.60   1
 -13  18 -19 10193.1 2359.86   4
  13   5 -19 12442.4 2220.11   4
  18 -13  19 9391.11 1751.65   1
   5 -18 -19 6015.08 1610.02   2
 -13  -5  16 8118.31 1870.25   3
  13 -18  16 12945.2 2174.65   1
 -18   5  16 10952.7 1900.64   3
  -5 -13 -16 10380.1 1902.24   2
  18 -13  16 11884.4 1737.78   1
 -13  18 -16 11909.8 2239.62   4
  13   5 -16 13336.8 2323.00   4
   5 -18 -16 11680.7 2052.34   2
   5 -18 -13 17650.3 2509.54   2
 -13  -5  13 20683.3 2681.67   3
 -18   5  13 21305.2 2407.66   3
  -5 -13 -13 18140.8 2633.12   2
 -13  18 -13 22665.7 2838.12   4
  13   5 -13 23370.2 2676.22   4
  13 -18  13 22606.0 2497.57   1
 -13  18 -10 75961.1 4865.62   4
  13 -18  10 81796.8 4440.56   1
   5 -18 -10 81892.2 5085.28   2
  -5 -13 -10 77012.6 4756.84   3
 -13  -5  10 83694.8 4994.64   3
 -18   5  10 79603.8 4522.89   3
 -18   5   7 124551. 5748.26   3
  13 -18   7 134273. 5796.80   2
  13 -18   7 116649. 5276.38   1
   5 -18  -7 113110. 6149.66   2
  -5 -13  -7 129095. 6398.80   3
 -13  -5   7 110171. 5892.36   3
  13 -18   4 137756. 5488.90   1
  13 -18   4 123751. 5738.33   2
   5 -18  -4 122505. 6406.14   2
  -5 -13  -4 117320. 6343.32   3
 -13  -5   4 126730. 6300.82   3
  13 -18   1 147019. 6373.76   2
   5 -18  -1 138455. 6742.55   2
  -5 -13  -1 146479. 7165.49   3
 -13  -5   1 135521. 6540.17   3
   5 -18   2 26357.4 2949.94   2
  -5 -13   2 30201.4 3188.16   3
 -13  -5  -2 28472.8 2949.17   3
  -5  18  -2 31058.1 2623.24   4
  13 -18  -2 27639.1 2725.54   2
   5 -18   5 27687.5 2788.89   2
  -5 -13   5 25662.9 3040.67   3
 -13  -5  -5 22625.8 2642.65   3
  -5  18  -5 25419.4 2588.86   4
  13 -18  -5 26732.1 2723.06   2
  -5  18  -8 51751.7 3740.73   4
  13 -18  -8 55944.6 3852.30   2
   5  13  -8 54773.3 3524.73   4
   5 -18   8 59919.4 3945.37   2
  -5 -13   8 55018.7 4398.60   3
 -13  -5  -8 52081.3 3861.44   3
  -5  18 -11 69446.3 4669.76   4
  13 -18 -11 71779.3 4364.12   2
   5  13 -11 68564.0 4405.57   4
   5 -18  11 69827.5 4171.24   2
  -5 -13  11 72720.3 5078.73   3
 -13  -5 -11 83690.6 4788.38   3
  -5 -13  14 13359.8 2363.22   3
 -13  -5 -14 16035.5 2159.09   3
  -5 -13  14 12032.4 2003.84   2
  -5  18 -14 12362.1 2398.42   4
   5 -18  14 13386.3 2389.41   1
   5  13 -14 13411.2 2115.98   4
  13 -18 -14 16380.8 2146.50   2
   5 -18  14 16856.7 2064.05   2
  -5  18 -17 5903.27 1884.77   4
  -5 -13  17 1976.26 1416.17   1
   5  13 -17 5045.47 1683.68   4
   5 -18  17 690.501 1495.60   1
  13 -18 -17 2851.29 1141.18   2
  -5  18 -20 4567.21 1926.91   4
   5  13 -20 2224.33 1464.89   4
  -5 -13  20 1349.71 1171.08   1
   5 -18  20 2287.42 1618.87   1
 -18  14 -23 5134.54 1653.17   4
  18 -14  23 447.140 1131.94   1
 -14  -4  20 8222.32 1993.99   3
  -4 -14 -20 2845.66 1304.79   2
  18 -14  20 3083.92 1253.77   1
 -18  14 -20 6052.68 1789.24   4
  14 -18  20 4284.93 1700.63   1
  14   4 -20 5081.98 1681.43   4
   4 -18 -20 1851.59 1055.23   2
   4 -18 -17-319.506 1331.93   2
  18 -14  17-212.715 1053.73   1
 -14  -4  17-93.1976 1273.00   3
  -4 -14 -17-31.0550 991.009   2
 -18   4  17-830.985 1200.99   3
  14 -18  17-346.171 1305.65   1
 -14  18 -17 1343.43 1626.63   4
   4 -18 -14 8094.09 1889.15   2
 -14  -4  14 8638.13 1927.90   3
  14 -18  14 8753.71 1658.55   1
  -4 -14 -14 10781.2 2121.78   2
 -18   4  14 7439.62 1658.63   3
 -14  18 -14 10427.0 2156.86   4
  -4 -14 -11 20982.7 2408.65   3
   4 -18 -11 19204.4 2602.61   2
 -14  -4  11 19438.3 2532.21   3
  -4 -14 -11 23022.9 2924.53   2
 -18   4  11 22004.0 2493.69   3
 -14  18 -11 25462.5 2924.68   4
  14 -18  11 23661.9 2381.66   1
  14 -18   8 74204.5 4140.85   1
   4 -18  -8 83795.5 5313.63   2
  -4 -14  -8 79712.6 4926.39   3
  -4 -14  -8 76708.1 5270.49   2
 -14  -4   8 70788.8 4605.61   3
 -18   4   8 81240.0 4534.96   3
  14 -18   5 84026.5 4647.73   2
  14 -18   5 91166.4 4324.59   1
   4 -18  -5 90965.7 5545.13   2
  -4 -14  -5 90599.2 5454.89   3
 -14  -4   5 87212.2 5138.31   3
 -18   4   5 87736.8 4833.09   3
 -18   4   2 69692.4 4213.77   3
  14 -18   2 59517.3 3345.56   1
  14 -18   2 60349.4 3935.08   2
   4 -18  -2 61945.1 4488.69   2
  -4 -14  -2 54379.5 4353.63   3
 -14  -4   2 60514.5 4248.21   3
  14 -18  -1 38009.1 3180.66   2
   4 -18   1 41674.1 3602.64   2
  -4 -14   1 44422.8 3972.23   3
 -14  -4  -1 39574.8 3412.70   3
  -4  18  -4 88301.2 4589.56   4
  14 -18  -4 82633.5 4691.00   2
   4 -18   4 81313.3 4939.59   2
  -4 -14   4 90787.8 5660.93   3
 -14  -4  -4 75909.1 4739.69   3
  -4  18  -7 152850. 6668.12   4
  14 -18  -7 146264. 6577.74   2
   4  14  -7 152712. 6163.37   4
   4 -18   7 171591. 7125.24   2
  -4 -14   7 163007. 7868.55   3
 -14  -4  -7 162600. 7120.68   3
  -4  18 -10 42086.8 3533.08   4
  14 -18 -10 41697.3 3377.25   2
   4  14 -10 42210.2 3313.96   4
   4 -18  10 40436.8 3251.61   2
  -4 -14  10 45417.4 4072.37   3
  -4 -14  10 40620.8 3593.06   2
 -14  -4 -10 42866.2 3465.04   3
 -14  -4 -13 11115.5 1872.84   3
  -4 -14  13 14134.3 2268.44   2
   4 -18  13 13819.5 2308.27   1
  -4  18 -13 9474.06 2008.12   4
   4  14 -13 12078.5 2051.02   4
  14 -18 -13 15781.2 2152.61   2
   4 -18  13 11936.7 1760.83   2
  -4 -14  16 9497.93 2081.22   1
  -4  18 -16 5670.95 1872.72   4
   4  14 -16 7439.54 1830.99   4
   4 -18  16 6742.23 2005.94   1
  -4  18 -19 12941.6 2592.78   4
   4  14 -19 8462.53 2182.19   4
  -4 -14  19 9558.89 2192.27   1
   4 -18  19 11015.8 2272.88   1
  18 -15  21 138861. 6663.75   1
 -18  15 -21 142706. 7356.96   4
  15 -18  21 141655. 7272.30   1
  18 -15  18 209250. 7856.31   1
 -15  18 -18 205277. 9403.77   4
   3 -18 -18 182250. 8072.78   2
  -3 -15 -18 172328. 8017.77   2
  15 -18  18 204251. 8420.46   1
 -15  -3  18 203229. 8771.94   3
 -18   3  18 194396. 8298.99   3
 -15  18 -15 304500. 11170.4   4
   3 -18 -15 261338. 10173.1   2
  -3 -15 -15 262111. 10437.6   2
  15 -18  15 286075. 9940.88   1
 -15  -3  15 295136. 10629.0   3
 -18   3  15 283297. 10199.8   3
 -15  18 -12 170594. 7784.82   4
   3 -18 -12 164866. 7782.40   2
  15 -18  12 170611. 6852.80   1
  -3 -15 -12 164820. 7916.02   2
 -15  -3  12 164876. 7435.99   3
 -18   3  12 172985. 7304.22   3
  15 -18   9 196955. 7236.28   1
   3 -18  -9 212693. 8962.52   2
  -3 -15  -9 205938. 9079.25   2
 -15  -3   9 194923. 8227.25   3
 -18   3   9 205890. 8066.12   3
  15 -18   6 148255. 5805.83   1
   3 -18  -6 143524. 7246.87   2
  -3 -15  -6 149752. 7186.75   3
  -3 -15  -6 148189. 7633.65   2
 -15  -3   6 145144. 6903.95   3
 -18   3   6 152279. 6673.56   3
  15 -18   3 135062. 5261.68   1
   3 -18  -3 135126. 6945.54   2
  -3 -15  -3 135034. 6952.02   3
  -3 -15  -3 137239. 7368.57   2
 -15  -3   3 136828. 6593.65   3
 -18   3   3 141825. 6367.39   3
   3 -18   0 83108.6 5292.93   2
  -3 -15   0 84622.7 5470.23   3
  -3 -15   0 78732.8 5447.94   2
 -15  -3   0 71909.9 4682.09   3
 -18   3   0 81399.7 4712.01   3
  -3 -15   3 22289.2 2874.37   3
   3 -18   3 18120.4 2525.59   2
 -15  -3  -3 17919.8 2411.39   3
  -3 -15   3 18520.7 2680.70   2
 -18   3  -3 22987.9 2566.53   3
  -3  18  -3 19505.5 2156.01   4
  -3 -15   6-571.106 1336.39   3
   3 -18   6 2090.47 1532.05   2
 -15  -3  -6 1516.66 1365.42   3
  -3 -15   6-48.2424 1307.49   2
 -18   3  -6 1123.70 1241.56   3
  -3  18  -6 988.655 1094.55   4
   3  15  -6-343.779 751.439   4
   3 -18   9 9165.84 1831.08   2
 -15  -3  -9 8640.96 1887.20   3
  -3 -15   9 7026.64 1760.42   2
 -18   3  -9 6669.35 1704.93   3
  -3  18  -9 5571.31 1535.10   4
   3  15  -9 6497.21 1466.59   4
 -18   3 -12 34642.2 3151.04   3
  -3  18 -12 41424.4 3638.11   4
   3  15 -12 34812.6 3210.62   4
   3 -18  12 37835.9 3179.08   2
  -3 -15  12 35565.7 3254.03   2
 -15  -3 -12 38276.0 3341.73   3
 -18   3 -15 88692.2 4957.44   3
  -3 -15  15 81550.8 5324.89   1
  -3  18 -15 78492.1 5340.03   4
   3 -18  15 72519.8 5225.11   1
   3  15 -15 79997.8 5201.45   4
 -15  -3 -15 79069.5 4725.01   3
  -3  18 -18 70416.5 5347.32   4
  -3 -15  18 67519.4 4988.70   1
   3  15 -18 75622.2 5379.12   4
   3 -18  18 77139.9 5417.51   1
   3  15 -21 85322.2 5970.67   4
  18 -16  22 38446.8 3579.86   1
   2 -18 -19 9974.72 1951.64   2
  -2 -16 -19 10441.6 2053.37   2
 -16  -2  19 14776.3 2438.24   3
 -18   2  19 11325.1 2069.67   3
 -18  16 -19 11803.4 2279.51   4
  18 -16  19 12383.4 2068.98   1
  16 -18  19 8396.33 1914.11   1
   2 -18 -16 18471.5 2538.35   2
  -2 -16 -16 21748.4 2821.27   2
 -16  -2  16 23644.1 2887.80   3
 -18   2  16 18968.0 2597.13   3
 -16  18 -16 22373.4 3025.12   4
  16 -18  16 20350.9 2475.27   1
   2 -18 -13 20502.1 2823.45   2
 -16  -2  13 22958.2 2764.38   3
  -2 -16 -13 15939.4 2461.77   2
 -18   2  13 17316.1 2328.58   3
  16 -18  13 16351.4 2098.80   1
   2 -18 -10 1340.73 1419.95   2
 -16  -2  10 3346.93 1458.43   3
  -2 -16 -10 1906.83 1202.99   2
  16 -18  10 3348.66 1208.94   1
 -18   2  10 1263.63 1339.73   3
  16 -18   7 9658.90 1474.52   1
   2 -18  -7 8740.96 1955.79   2
 -16  -2   7 11348.3 2039.15   3
  -2 -16  -7 11241.6 2424.20   2
 -18   2   7 9456.17 1905.88   3
   2 -18  -4 19167.0 2717.99   2
 -16  -2   4 17687.1 2498.81   3
  -2 -16  -4 16700.7 2639.82   2
 -18   2   4 18831.4 2496.73   3
   2 -18  -1 75710.9 5189.40   2
  -2 -16  -1 76923.1 5456.98   2
 -16  -2   1 77945.5 4895.54   3
 -18   2   1 84082.0 4872.79   3
  -2  18  -2 77231.5 4085.47   4
   2 -18   2 71699.2 4928.47   2
  -2 -16   2 70393.7 5081.79   2
 -16  -2  -2 72878.9 4724.36   3
 -18   2  -2 66767.1 4398.41   3
   2 -18   5 32240.4 3229.60   2
  -2 -16   5 31336.4 3332.25   2
 -16  -2  -5 32278.2 3180.53   3
  -2  18  -5 27663.8 2631.44   4
 -18   2  -5 31513.9 3065.70   3
   2 -18   8 23206.5 2651.24   2
  -2 -16   8 16938.5 2520.95   2
 -16  -2  -8 23371.3 2706.38   3
 -18   2  -8 20525.9 2558.42   3
  -2  18  -8 17234.2 2307.15   4
   2  16  -8 21887.2 2353.92   4
  -2  18 -11 129310. 6409.61   4
   2  16 -11 116965. 5873.05   4
   2 -18  11 125257. 6083.49   2
  -2 -16  11 133979. 6503.67   2
 -16  -2 -11 121514. 6110.31   3
 -18   2 -11 115393. 5872.75   3
   2 -18  14 77067.9 5400.53   1
  -2  18 -14 85913.5 5474.58   4
   2  16 -14 76027.2 5108.29   4
   2 -18  14 80046.8 4622.53   2
  -2 -16  14 88665.0 5028.72   2
 -16  -2 -14 96029.5 5310.00   3
 -18   2 -14 79633.5 4801.33   3
  -2  18 -17 85016.8 5757.05   4
  -2 -16  17 97396.3 6036.17   1
   2  16 -17 89300.9 5831.43   4
   2 -18  17 95556.2 6062.31   1
 -18   2 -17 89793.5 5084.79   3
   2  16 -20 28369.6 3495.45   4
   1 -18 -20 17429.0 2464.29   2
  -1 -17 -20 21481.0 2666.12   2
  18 -17  20 24304.7 2823.29   1
  17 -18  20 18239.0 2648.37   1
   1 -18 -17 29190.5 3214.63   2
  -1 -17 -17 25460.8 2965.86   2
 -17  -1  17 25770.6 3041.10   3
 -18   1  17 27136.7 3010.56   3
 -17  18 -17 34164.0 3663.81   4
  17 -18  17 23653.2 2723.55   1
   1 -18 -14 20755.1 2875.18   2
  -1 -17 -14 21850.5 2880.99   2
 -17  -1  14 27901.0 3042.61   3
 -18   1  14 22503.8 2728.95   3
  17 -18  14 21883.5 2447.71   1
   1 -18 -11 21784.9 2977.88   2
  -1 -17 -11 21140.7 2866.30   2
 -17  -1  11 20746.8 2686.12   3
 -18   1  11 19167.5 2616.65   3
   1 -18  -8 3601.53 1592.73   2
  -1 -17  -8 3810.28 1810.10   2
 -17  -1   8 6670.87 1857.44   3
 -18   1   8 4665.70 1664.30   3
   1 -18  -5 2056.63 1775.99   2
  -1 -17  -5 2829.95 1509.92   2
 -17  -1   5 6775.21 1844.82   3
 -18   1   5 3618.61 1426.29   3
  -1 -17  -2 205.780 1519.00   2
 -17  -1   2 248.797 1362.41   3
 -18   1   2 2112.49 1314.61   3
   1 -18   1 3375.15 1634.50   2
  -1 -17   1 277.158 1520.64   2
 -17  -1  -1 2051.57 1380.86   3
 -18   1  -1 3629.85 1384.76   3
   1 -18   4 21139.9 2831.01   2
  -1 -17   4 21661.2 2917.29   2
 -17  -1  -4 17348.2 2455.06   3
 -18   1  -4 19400.0 2598.72   3
  -1  18  -4 22283.5 2271.50   4
  -1 -17   7 32509.0 3310.28   2
  -1  18  -7 37276.7 3106.37   4
   1  17  -7 28854.7 2729.15   4
   1 -18   7 37130.0 3505.80   2
 -17  -1  -7 35325.6 3332.03   3
 -18   1  -7 36316.7 3257.29   3
  -1  18 -10 46292.7 3692.83   4
   1  17 -10 45967.3 3517.81   4
   1 -18  10 47837.1 3745.99   2
  -1 -17  10 46040.8 3800.21   2
 -17  -1 -10 47504.3 3804.45   3
 -18   1 -10 43059.3 3534.74   3
  -1  18 -13 57583.9 4345.51   4
   1  17 -13 55620.3 4201.76   4
   1 -18  13 53809.6 3919.37   2
  -1 -17  13 53354.6 3928.19   2
 -17  -1 -13 54921.1 4066.88   3
 -18   1 -13 55767.1 4013.73   3
  -1 -17  16 48772.0 4359.88   1
   1 -18  16 52457.2 4556.24   1
  -1  18 -16 51969.4 4378.35   4
   1  17 -16 50753.3 4297.03   4
 -18   1 -16 49655.5 3799.69   3
  -1  18 -19 38966.8 4040.33   4
   1  17 -19 46583.3 4392.88   4
   0 -18 -18 1596.73 1058.76   2
 -18   0  18-163.761 1337.26   3
   0 -18 -15 49316.5 4245.54   2
 -18   0  15 47178.4 4011.20   3
   0 -18 -12 49526.2 4336.86   2
 -18   0  12 51947.3 4159.36   3
   0 -18  -9 113131. 6670.04   2
 -18   0   9 112257. 6145.72   3
   0 -18  -6 157249. 8071.90   2
 -18   0   6 161413. 7453.22   3
   0 -18  -3 270344. 11026.6   2
 -18   0   3 277328. 10270.9   3
   0 -18   0 190934. 8877.22   2
 -18   0   0 186809. 8108.85   3
   0 -18   3 230624. 9642.76   2
 -18   0  -3 211511. 8771.73   3
   0  18  -6 227993. 8293.81   4
   0 -18   6 236398. 9555.66   2
 -18   0  -6 216114. 8870.10   3
   0  18  -9 178638. 7464.60   4
   0 -18   9 179086. 7962.34   2
 -18   0  -9 184514. 7901.16   3
   0  18 -12 119549. 6233.60   4
   0 -18  12 130376. 6407.22   2
 -18   0 -12 116529. 6215.86   3
 -18   0 -15 14757.4 2275.07   3
   0 -18  15 16792.0 2813.84   1
   0  18 -15 16706.7 2624.64   4
   0  18 -18 7426.85 1946.80   4
   9 -19 -20 54340.0 3869.92   2
  10   9 -20 56018.5 4705.07   4
  10 -19  20 53250.3 4510.63   1
 -10  -9  20 54412.8 4569.26   3
 -10  -9  17 44362.5 3578.30   1
   9 -19 -17 43347.6 3544.90   2
[truncated: 79,137 more chars]
